# Supplementary material for: Proteome reallocation in Escherichia coli with increasing specific growth rate
Source: Royal Society of Chemistry journal article supplement (doi:10.1039/c4mb00721b), 2015-02-16
Supplement: c4mb00721b1.xlsx [file c4mb00721b1.xlsx]

## Sheet: Sheet1
Supplementary dataset 1. Complete gene-specific dataset of protein concentrations, protein expression costs and covariance (between specific growth rate and protein expression cost) values in minimal glucose and rich defined media.
						Protein concentration (molecules per fL of cytosol volume)																							Protein expression cost (protein concentration multiplied with protein lenght in amino acids)
						Minimal medium replicate 1				Minimal medium replicate 2					Rich medium replicate 1								Rich medium replicate 2						Minimal medium replicate 1				Minimal medium replicate 2					Rich medium replicate 1								Rich medium replicate 2
					Glucose uptake rate (mmol gdcw-1 h-1)	2.66362	3.81325	4.91042	6.24085	2.78302	3.25247	4.35802	5.51578	6.24085	1.72502	1.9568	2.69092	3.37581	4.0496	4.77545	5.56957	6.53861	1.72502	3.17462	3.91338	4.62161	5.46963	6.00051	2.66362	3.81325	4.91042	6.24085	2.78302	3.25247	4.35802	5.51578	6.24085	1.72502	1.9568	2.69092	3.37581	4.0496	4.77545	5.56957	6.53861	1.72502	3.17462	3.91338	4.62161
Gene name	B number identifier	COG class	Molecular weight [kDa]	Sequence length	Specific growth rate (h-1)	0.21	0.31	0.41	0.51	0.22	0.26	0.36	0.46	0.51	0.22	0.25	0.35	0.45	0.55	0.65	0.74	0.82	0.22	0.42	0.53	0.63	0.73	0.78	0.21	0.31	0.41	0.51	0.22	0.26	0.36	0.46	0.51	0.22	0.25	0.35	0.45	0.55	0.65	0.74	0.82	0.22	0.42	0.53	0.63
thra	b0002	[e]	89.119	820		2678.86	3488.88	4547.33	5470.07	2699.99	3132.11	4021.71	5126.89	5651.21	1472.65	1736.19	2379.88	2861.06	3178.7	3412.56	3387.93	3476.81	1655.33	2772.45	3246.68	3393.67	3448.3	3628.83	2.19667e+06	2.86088e+06	3.72881e+06	4.48546e+06	2.21399e+06	2.56833e+06	3.2978e+06	4.20405e+06	4.634e+06	1.20757e+06	1.42367e+06	1.9515e+06	2.34607e+06	2.60653e+06	2.7983e+06	2.7781e+06	2.85098e+06	1.35737e+06	2.27341e+06	2.66228e+06	2.78281e+06
thrb	b0003	[e]	33.623	310		483.055	605.667	808.638	1003.87	516.458	554.755	776.601	847.817	890.662	295.911	378.772	417.375	531.86	593.619	644.452	670.84	652.018	452.184	553.267	657.621	703.707	705.632	758.528	149747	187757	250678	311199	160102	171974	240746	262823	276105	91732.3	117419	129386	164876	184022	199780	207960	202126	140177	171513	203863	218149
thrc	b0004	[e]	47.113	428		4480.06	5271.37	6219.87	7689.88	4463.8	4856.25	5820.56	6908.69	7523.29	3198.95	3487.48	4028.31	4556.35	4974.29	5238.69	5176.73	4681.25	3763.23	4814.71	5182.45	5380.08	5407.44	5723.26	1.91746e+06	2.25615e+06	2.6621e+06	3.29127e+06	1.91051e+06	2.07848e+06	2.4912e+06	2.95692e+06	3.21997e+06	1.36915e+06	1.49264e+06	1.72411e+06	1.95012e+06	2.129e+06	2.24216e+06	2.21564e+06	2.00358e+06	1.61066e+06	2.0607e+06	2.21809e+06	2.30268e+06
yaaa	b0006	[s]	29.585	258		177.401					219.483			208.561	162.121	240.88	200.465							180.905	160.258	169.918		183.914	45769.4					56626.6			53808.8	41827.2	62146.9	51720.1							46673.5	41346.6	43838.8
talb	b0008	[g]	35.219	317		15678.4	15830.9	16228.4	16650.6	15145.3	16126	16072.7	16283.7	16855.7	13765	14355.9	15864.4	16399.4	17757.4	17533.8	17027.3	15791.3	14517.4	16534.9	17354.6	17387.7	17311.7	17102.5	4.97004e+06	5.0184e+06	5.1444e+06	5.27824e+06	4.80105e+06	5.11196e+06	5.09503e+06	5.16193e+06	5.34326e+06	4.36352e+06	4.55083e+06	5.02902e+06	5.1986e+06	5.62911e+06	5.55821e+06	5.39767e+06	5.00583e+06	4.60201e+06	5.24155e+06	5.50142e+06	5.51189e+06
mog	b0009	[h]	21.222	195						95.5617	90.2763			72.7289	111.616				94.739						58.2869								18634.5	17603.9			14182.1	21765.2				18474.1						11365.9
dnak	b0014	[o]	69.114	638		12514.5	11915.6	11612	11793.1	12638.8	12273.8	11865.9	12157	12189.8	13364.9	13680.9	14443.1	14996.4	14995.1	14657.3	14624.8	13603.3	13294.4	13895.8	15492.5	14921	14612	13881.1	7.98423e+06	7.60214e+06	7.40843e+06	7.52399e+06	8.06356e+06	7.83066e+06	7.57046e+06	7.75615e+06	7.77709e+06	8.52681e+06	8.72841e+06	9.2147e+06	9.56771e+06	9.56685e+06	9.35135e+06	9.33061e+06	8.67888e+06	8.48181e+06	8.86551e+06	9.88422e+06	9.51957e+06
dnaj	b0015	[o]	41.1	376		528.808	537.248	514.771	526.888	543.584	560.594	557.573	567.91	557.85	548.507	519.952	567.469	560.796	609.736	591.859	558.937	500.408	581.146	558.323	621.905	572.063	549.928	531.672	198832	202005	193554	198110	204387	210783	209647	213534	209752	206238	195502	213368	210859	229261	222539	210160	188153	218511	209929	233836	215096
rpst	b0023	[j]	9.6843	87		12378.3	15223.2	18029	20864.6	12700.6	13526.4	16281.9	20196.5	21033.6	12883.7	14371.4	17385.8	20106.7	21688.3	25964.4	27047.7	28179.4	13665.5	18338.1	21719.6	23844.5	26345.6	28362	1.07691e+06	1.32441e+06	1.56852e+06	1.81522e+06	1.10495e+06	1.1768e+06	1.41652e+06	1.7571e+06	1.82992e+06	1.12088e+06	1.25031e+06	1.51257e+06	1.74928e+06	1.88688e+06	2.2589e+06	2.35315e+06	2.45161e+06	1.1889e+06	1.59541e+06	1.88961e+06	2.07447e+06
ribf	b0025	[h]	34.734	313						713.198			647.944	649.557	591.836													744.411					223231			202806	203311	185245
iles	b0026	[j]	104.3	938		1788.01	1868.45	1762.22	1722.4	1802.5	1894.55	1799.81	1819.76	1773.58	1546.66	1687.02	1671.77	1674.99	1555.15	1432.05	1410.58	1387.59	1597.75	1597.84	1586.04	1443.33	1382.49	1388.47	1.67715e+06	1.75261e+06	1.65296e+06	1.61561e+06	1.69074e+06	1.77709e+06	1.68822e+06	1.70694e+06	1.66362e+06	1.45077e+06	1.58243e+06	1.56812e+06	1.57114e+06	1.45874e+06	1.34326e+06	1.32312e+06	1.30156e+06	1.49869e+06	1.49878e+06	1.4877e+06	1.35385e+06
fkpb	b0028	[o]	16.081	149		464.429	529.419	529.965	501.699	495.903	462.203	523.597	495.366	462.814	469.098	414.924	506.576	476.416	513.256	494.148		365.917	425.794	491.357	528.185	538.27	563.604	504.039	69199.9	78883.4	78964.7	74753.2	73889.6	68868.3	78016	73809.6	68959.4	69895.6	61823.6	75479.8	70985.9	76475.2	73628		54521.6	63443.3	73212.1	78699.6	80202.2
isph	b0029	[im]	34.774	316		154.007		144.863	129.547				131.446	144.457					167.271	141.722					158.752		154.599	154.856	48666.1		45776.9	40936.9				41536.8	45648.4					52857.6	44784.3					50165.5
rihc	b0030	[f]	32.56	304							72.1594				56.6222										71.7751		26.5828							21936.5				17213.2										21819.6
dapb	b0031	[e]	28.756	273		573.565	512.844	612.017	897.416	488.089	493.141	556.673	732.055	849.996	275.601	271.586	282.086	330.956	274.441	316.929	342.974	378.574	386.703	316.157	304.452	323.563	330.017	339.227	156583	140006	167081	244995	133248	134627	151972	199851	232049	75239.1	74142.9	77009.4	90351.1	74922.4	86521.7	93631.9	103351	105570	86310.9	83115.3	88332.7
cara	b0032	[ef]	41.431	382		1058.5	1552.68	2058.86	2688.05	1093.19	1302.79	1725.58	2363.02	2668.7	1023.24	1264.05	1517.09	1962.96	2501.99	2829.09	3217.65	3753.4	972.294	1685.3	2318.2	2644.35	3002.63	3281.76	404346	593125	786485	1.02683e+06	417598	497667	659171	902672	1.01944e+06	390879	482869	579528	749852	955762	1.08071e+06	1.22914e+06	1.4338e+06	371416	643783	885554	1.01014e+06
carb	b0033	[ef]	117.84	1073		1251.89	1707.84	2055.29	2603.48	1274.94	1544.66	1834.48	2344.08	2659.19	1252.19	1550.28	1836.68	2243.19	2739.99	3081.43	3233.55	4065.48	1324.48	1895.09	2442.45	2861.85	3194.14	3482.41	1.34328e+06	1.83251e+06	2.20532e+06	2.79354e+06	1.36801e+06	1.65742e+06	1.96839e+06	2.51519e+06	2.85331e+06	1.3436e+06	1.66345e+06	1.97076e+06	2.40695e+06	2.94001e+06	3.30638e+06	3.4696e+06	4.36226e+06	1.42117e+06	2.03344e+06	2.62075e+06	3.07076e+06
fola	b0048	[h]	17.999	159					69.238															45.1773	130.085							11008.8															7183.2	20683.5
apah	b0049	[t]	31.296	280			74.9222	59.3963		90.3839	62.2432			58.3782			75.766							73.0971	88.1387	73.7544	67.5299	58.3009		20978.2	16631		25307.5	17428.1			16345.9			21214.5							20467.2	24678.8	20651.2
rsma	b0051		30.42	273		141.433	159.296	219.48	213.505	148.491		167.271	187.37	200.796	166.636									135.988	175.154	133.679	155.565	164.067	38611.3	43487.8	59918.1	58286.8	40538.2		45665	51152.1	54817.3	45491.6									37124.9	47817	36494.4
sura	b0053	[o]	47.283	428		1338.31	1176.27	1052.91	1085.06	1325.4	1217.12	1147.9	1133.33	1087.29	1653.11	1507.43	1340.78	1352.81	1111.16	1059.75	960.271	722.276	1595.74	1275.9	1191.16	1055.77	1421.81	1009.32	572798	503444	450646	464405	567273	520927	491299	485064	465361	707532	645181	573853	579001	475576	453571	410996	309134	682977	546087	509818	451869
lptd	b0054		89.67	784		297.016	278.264	254.689	252.398	286.211	281.868	267.852	252.819	254.49	289.4	289.715	250.384	243.994	234.702	231.08	229.757	219.098	303.204	248.803	230.699	237.38	209.518	220.31	232860	218159	199676	197880	224389	220985	209996	198210	199520	226890	227137	196301	191291	184006	181167	180129	171773	237712	195062	180868	186106
rapa	b0059		109.77	968		53.1124	65.9692	76.7061	78.6198	60.749	63.5964	62.9401	81.7994	85.1368	52.1705	51.743	59.5667	80.3705	68.3355	66.3291	92.1655	121.376	63.7239	64.8508	74.2517	84.3595	94.7613	104.301	51412.8	63858.2	74251.5	76103.9	58805.1	61561.3	60926.1	79181.8	82412.4	50501	50087.3	57660.6	77798.7	66148.8	64206.5	89216.2	117492	61684.7	62775.6	71875.7	81660
thib	b0068		36.163	327		383.884	441.273	404.417	494.152	346.15	423.958	415.872	417.902	426.163	467.538	411.209	387.426	494.603	600.767	510.443	473.13	156.544	416.625	514.826	526.203	503.654	1008.73	479.739	125530	144296	132245	161588	113191	138634	135990	136654	139355	152885	134465	126688	161735	196451	166915	154714	51189.8	136236	168348	172068	164695
leud	b0071	[e]	22.487	201		6811.82	7017.98	6460.49	5753.72	7313.31	7133.41	6864.75	5923.36	5717.32	2887.09	3128.77	3091.47	2954.71	2917.52	2620.88	2196.89	1858.08	2907.27	3007.32	3130.48	2885.31	2188.69	2332.97	1.36918e+06	1.41061e+06	1.29856e+06	1.1565e+06	1.46997e+06	1.43382e+06	1.37982e+06	1.1906e+06	1.14918e+06	580305	628882	621385	593897	586422	526797	441575	373474	584361	604472	629227	579948
leuc	b0072	[e]	49.881	466		4922.8	5098.79	4701.11	4060.32	5005.88	4992.83	4890.16	4255.84	4014.38	2045.09	2126.96	2126.37	2064.24	1959.47	1713.96	1353.8	1318.61	2145.03	2167.91	2257.01	2054.5	1561.97	1639.46	2.29403e+06	2.37603e+06	2.19072e+06	1.89211e+06	2.33274e+06	2.32666e+06	2.27881e+06	1.98322e+06	1.8707e+06	953013	991165	990890	961936	913114	798704	630869	614474	999584	1.01025e+06	1.05177e+06	957398
leub	b0073		39.517	363		4665.92	4571.6	3842.2	3396.07	4890.05	4820.73	4372.07	3768.06	3413.69	2007.09	2068.43	1947.11	1822.33	1859.48	1488.67	1328.27	1209.6	1977.46	2018.16	1973.26	1750.18	1351	1432.07	1.69373e+06	1.65949e+06	1.39472e+06	1.23277e+06	1.77509e+06	1.74993e+06	1.58706e+06	1.3678e+06	1.23917e+06	728573	750840	706802	661507	674991	540388	482162	439085	717819	732591	716293	635314
leua	b0074	[e]	57.297	523		5542.02	5439.35	4353.29	3526.57	5740.98	5547.02	4719.83	3902.56	3541.55	2171.82	2143.84	1973.87	1836.9	1701.59	1408.56	1147.66	985.864	2312.78	2097.3	2053.7	1687.56	1176.13	1341.04	2.89848e+06	2.84478e+06	2.27677e+06	1.8444e+06	3.00253e+06	2.90109e+06	2.46847e+06	2.04104e+06	1.85223e+06	1.13586e+06	1.12123e+06	1.03234e+06	960698	889929	736676	600226	515607	1.20958e+06	1.09689e+06	1.07409e+06	882593
ilvi	b0077		62.984	574		520.67	495.06	488.617	496.363	511.01	509.426	485.21	497.355	497.018	379.451	370.779	382.92	373.615	404.147	397.841	365.366	357.18	455.823	398.687	401.116	355.811	348.63	367.228	298864	284164	280466	284913	293320	292411	278510	285482	285288	217805	212827	219796	214455	231981	228361	209720	205021	261642	228847	230240	204236
ilvh	b0078	[e]	17.977	163		1235.16	1251.28	1065	1115.03	1099.88	1181.12	1077.15	1112.86	1160.53	837.813	702.725	817.603	815.471	803.542	772.518	711.685	691.7	959.99	848.101	825.277	797.844	694.582	721.522	201331	203958	173594	181750	179280	192523	175575	181397	189166	136564	114544	133269	132922	130977	125920	116005	112747	156478	138241	134520	130049
cra	b0080		37.999	334		154.583	168.341	142.349	91.9065	198.583	210.102	144.074			214.618	178.072	198.206	150.171	131.684		105.898	86.6736	222.792	214.425		137.045		94.2357	51630.7	56226	47544.7	30696.8	66326.8	70174	48120.7			71682.4	59476.2	66200.8	50157.1	43982.3		35369.9	28949	74412.6	71618		45773.2
rsmh	b0082		34.877	313		157.158	161.44	139.621	135.908	147.353	121.971	134.16	143.494	138.262	144.684	155.806	127.018	138.559	112.919	113.557		91.1794	185.682	123.752	107.274	109.852	109.506	105.899	49190.4	50530.9	43701.4	42539.2	46121.6	38177	41992.1	44913.7	43275.9	45286	48767.4	39756.6	43368.9	35343.5	35543.2		28539.1	58118.6	38734.5	33576.7	34383.8
mure	b0085	[m]	53.343	495		84.301	69.9606	85.6661	97.5781	79.1152	90.8043	84.3084	91.509	98.449	83.9599	89.0217	74.7425	87.7022				88.2408		102.553	79.7234	81.4428	81.9958	78.6262	41729	34630.5	42404.7	48301.2	39162	44948.1	41732.7	45297	48732.3	41560.1	44065.7	36997.5	43412.6				43679.2		50763.9	39463.1	40314.2
murf	b0086	[m]	47.447	452		30.7292	40.0476	48.8052	47.4933	41.7793	40.4782	52.6581			36.0642	36.4045		39.2957		38.6566	33.5548			38.2192	36.4701	37.6681	36.1899	42.1642	13889.6	18101.5	22060	21467	18884.2	18296.1	23801.4			16301	16454.8		17761.7		17472.8	15166.8			17275.1	16484.5	17026
murd	b0088	[m]	46.973	438		155.782	125.395	126.718	180.482	143.278	136.134	116.729	202.947	159.331	134.086	105.148	127.824	113.901	242.563	165.456	225.801	106.114	106.031	142.864	175.505	93.4311	107.249	121.137	68232.4	54922.9	55502.4	79051	62755.6	59626.6	51127.1	88890.7	69787.1	58729.7	46054.9	55987	49888.5	106243	72469.6	98900.8	46477.8	46441.8	62574.6	76871.2	40922.8
murg	b0090	[m]	37.814	355		42.9749	55.7639	53.3794	55.3456	45.621	47.4376	46.4949	50.1597	58.137	50.3736									66.4312	63.9112	63.8358	62.6347	57.7526	15256.1	19796.2	18949.7	19647.7	16195.5	16840.3	16505.7	17806.7	20638.6	17882.6									23583.1	22688.5	22661.7
murc	b0091	[m]	53.625	491		45.4738	45.2452	52.1955	62.7924	50.9428	51.4689		49.1108	51.6195	51.5661				54.5835					62.5355	58.2862	51.8515	57.0551	40.4119	22327.6	22215.4	25628	30831.1	25012.9	25271.2		24113.4	25345.2	25318.9				26800.5					30704.9	28618.5	25459.1
ddlb	b0092	[m]	32.839	306		69.9387	78.1708	62.0459		77.0266														66.0387					21401.2	23920.3	18986.1		23570.1														20207.8
ftsa	b0094	[d]	45.329	420		201.644	208.93	193.888	215.499	218.148	197.564	189.332	196.796	207.207	216.003	273.587	223.01	174.562	173.399	197.609	159.697	164.576	224.608	185.104	188.804	158.989	151.98	157.881	84690.6	87750.5	81433	90509.5	91622.3	82976.8	79519.6	82654.4	87027	90721.4	114906	93664.3	73316.2	72827.7	82995.9	67072.7	69122.1	94335.5	77743.9	79297.9	66775.2
ftsz	b0095	[d]	40.323	383		2354.18	2334.73	2270.92	2394.96	2378.77	2399.27	2349.28	2293.23	2310.97	2737.09	2810.86	2844.03	2639.64	2443.29	2271.47	2184.8	2138.24	3029.48	2615.92	2515.09	2186.93	2185.72	2125.72	901653	894203	869761	917269	911068	918922	899774	878309	885102	1.0483e+06	1.07656e+06	1.08926e+06	1.01098e+06	935781	869972	836777	818944	1.16029e+06	1.0019e+06	963278	837594
lpxc	b0096	[m]	33.956	305		141.127	53.9701	49.0459	52.3697	77.5635	72.2691		56.0198	54.2884	45.0962	44.7252			67.6638		47.5147			61.6985	63.5425	50.6493	53.3291	53.2796	43043.7	16460.9	14959	15972.8	23656.9	22042.1		17086	16558	13754.3	13641.2			20637.5		14492			18818	19380.4	15448
seca	b0098	[u]	102.02	901		668.719	640.642	586.992	578.536	674.474	702.73	619.817	598.477	570.197	874.65	849.597	933.234	824.299	774.366	714.773	734.542	650.608	883.938	869.23	841.324	749.25	709.414	679.704	602516	577218	528880	521261	607702	633160	558455	539228	513747	788059	765487	840844	742693	697704	644010	661823	586198	796428	783176	758033	675074
yacf	b0102	[s]	28.291	247		94.624	97.1469	95.3418	77.1275		90.8393	84.9588			90.0972											86.9535	75.7532	80.0391	23372.1	23995.3	23549.4	19050.5		22437.3	20984.8			22254											21477.5
guac	b0104	[f]	37.383	347		602.112	773.622	978.492	1073.42	566.85	662.393	888.291	1118.82	1139.92	415.004	485.013	666.93	818.828	955.302	1105.34	1117.89	1214.7	543.924	738.396	850.699	1022.36	1045.57	1140.08	208933	268447	339537	372476	196697	229851	308237	388231	395553	144006	168300	231425	284133	331490	383553	387906	421501	188741	256223	295192	354758
nadc	b0109	[h]	32.762	297		166.298	166.46	149.736	152.384	178.292	172.161	156.115	151.939	129.097	147.794	145.293	128.897	150.929		129.578	220.747	103.149	160.521	134.851	142.111	118.003	113.527	115.469	49390.5	49438.7	44471.6	45258	52952.7	51131.8	46366.1	45125.7	38341.7	43894.9	43152	38282.5	44826		38484.7	65561.8	30635.3	47674.7	40050.8	42206.9	35046.8
arop	b0112	[e]	49.69	457		159.993	162.714	166.969	160.152	162.201	174.414	181.422	173.429	159.529	76.7851	78.0489	91.3324	88.0457	86.4323	91.3531	85.2758	33.2139	78.3173	80.7986	102.55	72.4426	66.2936	50.4421	73116.9	74360.5	76304.6	73189.4	74125.7	79707.1	82909.7	79257	72904.6	35090.8	35668.3	41738.9	40236.9	39499.6	41748.3	38971.1	15178.8	35791	36925	46865.5	33106.3
pdhr	b0113	[k]	29.425	254
acee	b0114	[c]	99.667	887		5695.2	5785.34	5743.83	5798.39	5749.42	5779.44	5898.59	5893.39	5954.74	6294.04	6654.77	6854.99	7192.48	7074.98	7137.32	7826.04	10143.8	6285.73	6683.9	7151.64	7119.07	7436.21	8425.82	5.05164e+06	5.1316e+06	5.09478e+06	5.14317e+06	5.09973e+06	5.12636e+06	5.23205e+06	5.22744e+06	5.28186e+06	5.58281e+06	5.90278e+06	6.08038e+06	6.37973e+06	6.27551e+06	6.3308e+06	6.9417e+06	8.99756e+06	5.57545e+06	5.92862e+06	6.3435e+06	6.31462e+06
acef	b0115	[c]	66.095	630		4538.48	4503.44	4523.74	4525.86	4609.21	4588.56	4654.75	4555.6	4819.82	5080.52	5169.77	5280.03	5444.66	5378.07	5709.82	6098.49	7875.19	4873.71	5155.4	5344.49	5487.35	5671.63	6567.54	2.85924e+06	2.83717e+06	2.84995e+06	2.85129e+06	2.9038e+06	2.89079e+06	2.9325e+06	2.87003e+06	3.03649e+06	3.20073e+06	3.25695e+06	3.32642e+06	3.43013e+06	3.38819e+06	3.59718e+06	3.84205e+06	4.96137e+06	3.07044e+06	3.2479e+06	3.36703e+06	3.45703e+06
lpd	b0116	[c]	50.688	474		10882.4	12005.8	11803.7	10458.9	11016.7	11786.5	12490	11688	10667.7	10710	11922.7	15127.9	16277.2	17140.2	16256.3	15231.3	13298.4	10360.7	15465	17218.9	17095.9	15596.3	15001	5.15827e+06	5.69076e+06	5.59495e+06	4.9575e+06	5.22193e+06	5.58682e+06	5.92026e+06	5.54009e+06	5.05649e+06	5.07654e+06	5.65136e+06	7.17062e+06	7.7154e+06	8.12446e+06	7.70549e+06	7.21961e+06	6.30346e+06	4.91099e+06	7.33041e+06	8.16175e+06	8.10346e+06
acnb	b0118	[c]	93.497	865		22299.2	19752.9	13413.5	9885.54	22158	22457.4	16145.6	11687.4	9787.91	20649.5	23362.6	22446	21435.4	18240	13625.2	10924.9	8171.53	20411.7	20319.7	18465.5	14407	11868	9792.54	1.92888e+07	1.70863e+07	1.16027e+07	8.55099e+06	1.91666e+07	1.94257e+07	1.39659e+07	1.01096e+07	8.46654e+06	1.78618e+07	2.02086e+07	1.94158e+07	1.85416e+07	1.57776e+07	1.17858e+07	9.45006e+06	7.06837e+06	1.76562e+07	1.75765e+07	1.59727e+07	1.2462e+07
yacl	b0119	[s]	13.941	120		273.571	118.557	107.711					120.993	127.4								197.332				113.291			32828.6	14226.9	12925.3					14519.2	15288								23679.8				13595
sped	b0120	[e]	30.384	264		201.354	291.271	368.468	471.868	205.168	232.33	316.273	434.179	446.322	172.141	187.977	250.431	316.74	346.981	389.569		399.57	245.627	272.473	337.283	420.125	393.325	421.614	53157.5	76895.5	97275.6	124573	54164.3	61335.1	83496.1	114623	117829	45445.3	49625.9	66113.8	83619.3	91602.9	102846		105486	64845.6	71933	89042.8	110913
spee	b0121	[e]	32.321	288		270.426	301.275	378.586	339.477	249.907	269.284	356.044	382.444	456.473	226.36	286.763	300.692	361.109	252.025	374.663	312.295	344.708	251.667	237.849	312.047	317.945	313.072	328.223	77882.7	86767.3	109033	97769.3	71973.2	77553.9	102541	110144	131464	65191.6	82587.7	86599.3	103999	72583.3	107903	89940.9	99275.8	72480.2	68500.5	89869.4	91568.3
yacc	b0122		12.854	115
cueo	b0123	[q]	56.556	516		259.322	275.501	263.873	280.221	240.47	265.383	296.056	278.735	313.544	251.893	251.85	294.122	321.93	290.967	286.817	288.619	222.601	299.426	328.199	324.277	309.425	377.766	264.5	133810	142158	136159	144594	124082	136938	152765	143827	161789	129977	129955	151767	166116	150139	147998	148927	114862	154504	169351	167327	159663
gcd	b0124	[g]	86.746	796		50.7604	39.9676	48.6268	59.1029	47.1991	42.1719	53.8462	61.091	56.4661	37.1489	27.912	34.6703				29.8103	41.7577		20.1402	20.2423	20.999	28.2893	28.1369	40405.3	31814.2	38707	47045.9	37570.5	33568.8	42861.5	48628.4	44947	29570.6	22217.9	27597.6				23729	33239.2		16031.6	16112.9	16715.2
hpt	b0125		20.115	178		678.631	712.873	656.997	704.283	711.184	701.535	638.752	694.656	780.11	662.015	633.88	705.224	714.827	705.043	795.157	753.357	784.158	658.851	721.223	790.063	777.818	753.203	850.771	120796	126891	116945	125362	126591	124873	113698	123649	138860	117839	112831	125530	127239	125498	141538	134098	139580	117276	128378	140631	138452
can	b0126	[p]	25.096	220		2355.61	2217.6	2039.58	2101.84	2275.11	2362.62	2018.68	2012.63	2032.61	1900.43	2154.72	1966.08	2027.05	1878.57	1736.9	1718.01	1901.69	2186.41	1787.26	1769.93	1769.49	1624.27	1470.14	518234	487871	448707	462406	500525	519776	444110	442778	447174	418094	474039	432537	445951	413286	382118	377962	418372	481010	393197	389385	389287
yadg	b0127	[v]	34.647	308		153.174	136.082	116.414	106.616	134.372	132.188	122.943	118.218	114.4	124.256	122.774	119.01		99.3083	82.5185	88.6185		106.909	110.235	106.503	87.3059	86.4615		47177.6	41913.1	35855.5	32837.9	41386.6	40713.9	37866.3	36411.3	35235.3	38270.9	37814.5	36655		30587	25415.7	27294.5		32927.9	33952.4	32803	26890.2
pand	b0131	[h]	13.834	126		553.792	678.366	655.17	786.341	681.8	696.049	664.251	857.801	942.91	550.702		542.018	646.943	692.543			963.747		661.96	700.519	805.279	924.696	884.404	69777.8	85474.1	82551.4	99078.9	85906.8	87702.2	83695.7	108083	118807	69388.5		68294.3	81514.8	87260.4			121432		83407	88265.4	101465
panc	b0133	[h]	31.597	283		1626.57	1498.97	1365.09	1378.77	1653.12	1611.42	1456.35	1334.38	1346.99	1765.76	1678.5	1480.48	1414.54	1224.45	1101.8	1106.35	1078.47	1867.22	1449.7	1399.04	1181.5	1119.71	1162.12	460320	424209	386320	390191	467834	456031	412148	377629	381199	499709	475014	418976	400315	346518	311809	313097	305208	528423	410266	395929	334364
panb	b0134	[h]	28.237	264		1576.68	1556.04	1395.34	1282.15	1587.42	1573.95	1527.66	1399.15	1381.32	1699.73	1682.68	1709.34	1462.44	1366.3	1298.19	1275.7	1283.21	1749.1	1432.73	1385.41	1312.45	1267.62	1221	416243	410794	368368	338487	419078	415523	403303	369376	364667	448728	444227	451265	386085	360703	342723	336784	338768	461763	378241	365748	346486
pcnb	b0143	[j]	53.87	465		44.438	44.2695	60.2541	73.6828	52.908	59.7607	52.9766	54.7978	66.8577	38.7874									62.628	58.0284	59.2126	67.5303	68.2431	20663.7	20585.3	28018.2	34262.5	24602.2	27788.7	24634.1	25481	31088.8	18036.1									29122	26983.2	27533.9
dksa	b0145	[t]	17.528	151		1707.22	1760.59	1819.8	1429.05	1597.14	1709.34	1929.01	1548.76	1745.96	1964.65	2126.7	2291.58	2328.39	2415.81	1953.15	1684.78	884.623	1989.26	2496.04	2499.77	2264.37	2061.87	1980.71	257790	265849	274790	215787	241168	258110	291280	233863	263640	296662	321132	346029	351586	364788	294926	254402	133578	300378	376902	377465	341919
mrcb	b0149	[m]	94.291	844		518.19	449.267	354.648	326.487	467.801	491.057	474.525	322.471	334.152	456.52	459.291	468.679	404.975	273.193	216.269	296.211			372.918	311.016	343.406	267.57	299.198	437352	379181	299323	275555	394824	414452	400499	272165	282024	385303	387642	395565	341799	230575	182531	250002			314743	262497	289835
fhua	b0150	[p]	82.181	747		463.807	449.976	447.524	449.867	463.82	432.877	427.783	450.715	442.426	356.148	382.326	423.545	433.49	407.819	362.915	372.871	318.627	360.472	391.748	347.821	277.253	328.097	120.628	346464	336132	334300	336050	346473	323359	319554	336684	330492	266043	285597	316388	323817	304640	271097	278535	238015	269272	292636	259822	207108
heml	b0154	[h]	45.366	426		1023.86	1088.22	1053	1058.51	1027.99	1073.08	1086.27	1018.26	1097.72	929.523	975.639	1029.6	1037.95	1004.06	1025.93	967.241	978.658	1073.69	1000.96	971.3	960.024	949.473	937.043	436163	463581	448576	450927	437923	457133	462749	433778	467629	395977	415622	438611	442166	427728	437048	412045	416908	457391	426408	413774	408970
erpa	b0156		12.1	114		1014.51	1246.14	1272.78	1262.35	1067.7	1162.49	1220.91	1313.12	1374.16	929.494	1080.67	1199.51	1268.03	1103.17	1254.83	1285.15	1118.73	949.175	1119.94	1150.88	1209.41	1259.26	1178.73	115654	142060	145097	143908	121718	132524	139184	149696	156654	105962	123197	136745	144555	125761	143051	146507	127535	108206	127673	131200	137873
mtn	b0159		24.354	232		396.405	425.712	493.339	429.221	436.619	448.657	469.823	424.549	450.698	362.702		467.75	441.818	369.378	382.056	306.606	369.904		385.487	353.858	408.587	376.574	339.361	91966	98765.1	114455	99579.2	101296	104088	108999	98495.3	104562	84146.9		108518	102502	85695.8	88637.1	71132.6	85817.8		89433.1	82095	94792.2
degp	b0161	[o]	49.354	474		1447.63	1065.5	806.552	792.874	1524.02	1552.4	935.877	809.11	781.929	2396.99	2388.5	2213.76	1772.89	1402.22	1119.83	966.493	993.324	2613.16	2037.79	1567.92	1225.9	986.863	905.934	686177	505046	382306	375822	722386	735838	443606	383518	370634	1.13617e+06	1.13215e+06	1.04932e+06	840352	664651	530802	458118	470836	1.23864e+06	965912	743196	581079
yaeh	b0163		15.096	128		7301.72	5152.67	4266.63	2964.64	7055.37	6062.08	4800.89	3641.4	2951.65	8195.18	6566.17	5413.57	4050.98	3014.11	2029.21	1889.42	1306.3	7965.32	4573.47	3226.21	2364.49	1818.75	1713.74	934621	659541	546128	379474	903087	775946	614514	466099	377812	1.04898e+06	840469	692937	518525	385806	259738	241846	167207	1.01956e+06	585404	412954	302655
dapd	b0166	[e]	29.892	274		3905.46	4234.29	4919.25	6352.56	4055.14	4236.01	4549.76	5597.36	6654.1	2809.27	2917.5	3112.92	3170.14	3303.14	3369.6	3189.19	3713.97	2854.64	3196.81	3338.25	3245.85	3301.92	3389.1	1.0701e+06	1.1602e+06	1.34788e+06	1.7406e+06	1.11111e+06	1.16067e+06	1.24664e+06	1.53368e+06	1.82322e+06	769741	799395	852941	868619	905062	923270	873837	1.01763e+06	782171	875927	914682	889363
glnd	b0167	[o]	102.39	890						5.72452															4.25869								5094.83															3790.24
map	b0168	[j]	29.33	264		552.843	590.086	563.619	590.842	521.261	532.306	506.914	574.547	594.527	487.579	514.854	591.311	618.298	748.427	668.09	645.513	492.351	568.697	593.925	607.264	659.885	667.757	583.506	145950	155783	148796	155982	137613	140529	133825	151680	156955	128721	135921	156106	163231	197585	176376	170416	129981	150136	156796	160318	174210
rpsb	b0169	[j]	26.743	241		16328.8	19947.3	23553.3	26576.6	16396.1	17347.4	21559.1	24648	25726.4	15645.6	16915.3	20605.1	24698.1	26943.1	30437.5	32025	33926.7	16938	23141.5	27663.9	29898.1	31506.8	32900.1	3.93524e+06	4.8073e+06	5.67636e+06	6.40497e+06	3.95147e+06	4.18071e+06	5.19574e+06	5.94016e+06	6.20005e+06	3.77058e+06	4.0766e+06	4.96582e+06	5.95224e+06	6.49329e+06	7.33543e+06	7.71803e+06	8.17632e+06	4.08206e+06	5.57711e+06	6.66701e+06	7.20545e+06
tsf	b0170	[j]	30.423	283		14366.4	16557	19061.4	20671.9	14181.1	15129.2	18191.3	19968.7	21159.8	14958.2	16044.1	18899.2	21977	23731.4	25950	26444.1	25183.9	15275.5	20657.3	23565.5	25483	25971.9	27653.8	4.06569e+06	4.68563e+06	5.39437e+06	5.85014e+06	4.01324e+06	4.28157e+06	5.14814e+06	5.65114e+06	5.98822e+06	4.23316e+06	4.54049e+06	5.34848e+06	6.21949e+06	6.716e+06	7.34385e+06	7.48369e+06	7.12703e+06	4.32297e+06	5.84601e+06	6.66904e+06	7.21169e+06
pyrh	b0171	[f]	25.97	241		520.664	672.145	631.36	649.202	521.54	541.604	596.061	621.267	653.821	505.106	498.331	652.351	708.596	820.222	862.664	812.099	927.747	475.392	673.044	791.859	793.578	848.676	883.025	125480	161987	152158	156458	125691	130526	143651	149725	157571	121731	120098	157217	170772	197674	207902	195716	223587	114569	162204	190838	191252
frr	b0172	[j]	20.638	185		3796.24	3731.67	3545.92	3489.77	3913.12	3959.03	3839.17	3410.68	3356.7	4339.16	4689.09	4697.35	4638.27	4481.5	4471.93	4079.76	2346.87	4717.86	4531.64	4685.83	4745.53	4808.37	4435.61	702304	690359	655996	645607	723927	732421	710246	630975	620989	802745	867481	869009	858080	829078	827308	754756	434171	872804	838354	866879	877924
ispu	b0174	[i]	28.444	253				64.3049							69.0525											38.6098	37.5701				16269.1							17470.3											9768.27
rsep	b0176		49.071	450					15.4829																			19.9507				6967.31
bama	b0177		90.552	810		1722.68	1712.51	1695.26	1638.4	1772.28	1730.78	1650.61	1667.67	1703.2	1962.17	1959.36	1947.5	1821.64	1743.15	1703.22	1689.22	1665.75	2101.27	1951.27	1892.52	1746.5	1629.92	1710.16	1.39537e+06	1.38713e+06	1.37316e+06	1.32711e+06	1.43555e+06	1.40193e+06	1.33699e+06	1.35081e+06	1.37959e+06	1.58935e+06	1.58708e+06	1.57747e+06	1.47553e+06	1.41195e+06	1.37961e+06	1.36827e+06	1.34926e+06	1.70203e+06	1.58053e+06	1.53294e+06	1.41467e+06
skp	b0178		17.688	161		9345.84	9105.99	8698.32	8841.58	9271.28	10158	9220	8492.7	9011.04	9157.75	9170.92	8629.05	8773.66	7937.99	8201.78	7318.25	5538.88	8727.27	8072.81	8261.13	7533.17	10184.3	7703.64	1.50468e+06	1.46606e+06	1.40043e+06	1.42349e+06	1.49268e+06	1.63544e+06	1.48442e+06	1.36732e+06	1.45078e+06	1.4744e+06	1.47652e+06	1.38928e+06	1.41256e+06	1.27802e+06	1.32049e+06	1.17824e+06	891760	1.40509e+06	1.29972e+06	1.33004e+06	1.21284e+06
lpxd	b0179	[m]	36.038	341		231.012	214.097	223.486	204.472	231.96	228.379	217.455	210.502	205.961	259.74	258.661	255.501	207.737	192.904	210.143	207.863	229.441	270.249	204.71		209.647	203.219	225.072	78775	73007	76208.7	69725	79098.2	77877.1	74152.1	71781.1	70232.8	88571.3	88203.4	87125.9	70838.2	65780.2	71658.7	70881.3	78239.3	92155	69806.3		71489.6
fabz	b0180	[i]	17.033	151		1887.54	2088.58	2441.36	2567.05	1833.25	2067.62	2242.43	2453.08	2576.15	1643.58	1778.75	2023.14	2087.47	2313.33	2552.9	2881.24	2725.48	1686.86	2101.74	2302.54	2506.84	2641.67	2877.25	285018	315376	368646	387625	276821	312211	338607	370415	388998	248180	268592	305494	315208	349312	385489	435067	411547	254716	317362	347683	378533
lpxa	b0181	[m]	28.08	262		592.313	573.069	557.512	478.421	609.931	700.335	746.093	547.939	561.517	659.178	734.518	675.526	544.066	579.341	465.373	466.373	383.858	645.542	594.174	506.321	468.658	436.251	413.971	155186	150144	146068	125346	159802	183488	195476	143560	147118	172705	192444	176988	142545	151787	121928	122190	100571	169132	155674	132656	122788
acca	b0185	[i]	35.241	319		2077.9	2055.42	2031.76	2004.89	2109.8	2077.49	2030.44	2097.98	1972.64	2252.15	2505.91	2370.11	2386.93	2371.01	2361.77	2409.33	2307.95	2305.67	2375.32	2444.43	2495.25	2236.76	2443.72	662849	655680	648131	639561	673027	662721	647710	669256	629273	718437	799385	756066	761431	756352	753404	768577	736235	735507	757726	779775	795984
yaer	b0187		14.737	129
rof	b0189	[k]	9.4795	84																								18.3053
nlpe	b0192	[mp]	25.844	236					20.0803																							4738.96
pros	b0194	[j]	63.692	572		1903.12	2009.62	2015.3	2087.7	1874.77	1944.31	2016.95	2169.18	2128.38	1815.48	1974.12	2158.84	2365.21	2550.68	2411.66	2399.51	2568.9	1911.8	2156.33	2355.51	2342.16	2435.67	2330.52	1.08859e+06	1.1495e+06	1.15275e+06	1.19417e+06	1.07237e+06	1.11215e+06	1.1537e+06	1.24077e+06	1.21744e+06	1.03846e+06	1.1292e+06	1.23486e+06	1.3529e+06	1.45899e+06	1.37947e+06	1.37252e+06	1.46941e+06	1.09355e+06	1.23342e+06	1.34735e+06	1.33972e+06
rcsf	b0196		14.163	134		251.51		215.611	174.467	228.268		239.194	197.414	218.584	207.872			179.597		197.092	167.782		249.765	209.983	196.901	174.85	165.193	153.689	33702.3		28891.8	23378.6	30588		32052	26453.5	29290.3	27854.9			24066		26410.4	22482.8		33468.5	28137.7	26384.8	23430
metq	b0197	[p]	29.431	271		28736.9	28361.3	29014.7	28466.1	29615.9	28834.2	28224.4	28789.3	28728.7	20892.7	21747.1	23104.4	22968.5	21785.9	21498.8	20927.4	16980.2	21243.4	22272.6	22004.1	20909.2	20179.5	18849.4	7.78771e+06	7.68592e+06	7.86297e+06	7.71432e+06	8.02592e+06	7.81406e+06	7.6488e+06	7.80191e+06	7.78549e+06	5.66192e+06	5.89346e+06	6.2613e+06	6.22446e+06	5.90398e+06	5.82619e+06	5.67132e+06	4.60164e+06	5.75695e+06	6.03588e+06	5.9631e+06	5.6664e+06
meti	b0198	[p]	23.256	217
metn	b0199	[p]	37.788	343		328.52	334.386	388.693	470.107	327.308	348.834	372.477	448.672	501.864	225.347	224.701	313.032	351.209	442.905	488.036	397.424	450.448	277.016	281.873	323.532	332.95	397.896	390.872	112682	114695	133322	161247	112267	119650	127760	153895	172139	77294	77072.5	107370	120465	151916	167396	136316	154504	95016.5	96682.3	110971	114202
gmhb	b0200	[e]	21.294	191		181.171	176.882	166.774		167.464		159.258	150.933	149.482	148.71		151.807							142.568	144.69	137.812	127.685	125.411	34603.7	33784.4	31853.8		31985.6		30418.3	28828.1	28551.1	28403.5		28995.2							27230.4	27635.8	26322.2
dkgb	b0207	[r]	29.436	267		111.03	289.234	161.368			318.252	214.188	120.754	110.891	356.727											179.77			29645	77225.6	43085.3			84973.4	57188.2	32241.4	29607.9	95246.2											47998.5
glob	b0212	[r]	28.434	251		219.75	158.536	106.571		233.938	177.53	151.092	100.626		232.526		191.938		118.386		58.1798			133.073	120.664	85.4019	69.7445		55157.3	39792.5	26749.3		58718.4	44560	37924.2	25257.1		58364.1		48176.4		29714.8		14603.1			33401.4	30286.7	21435.9
ivy	b0220		16.872	157		1033.68	887.86	582.907	603.28	997.089	965.964	706.082	537.79	668.338	1227.59	1554.73	1143.53	812.871			442.823		1374.23	931.242	665.264	492.17	721.115	336.42	162288	139394	91516.5	94714.9	156543	151656	110855	84433.1	104929	192732	244092	179535	127621			69523.3		215754	146205	104446	77270.8
fade	b0221	[i]	89.223	814		333.389	291.81	203.139	129.656	254.632	138.616	198.201	123.518	105.319	285.31	92.643			150.354				271.181	280.512	229.197	152.425			271379	237533	165355	105540	207270	112833	161335	100544	85730	232243	75411.4			122388				220741	228337	186566	124074
lpca	b0222	[g]	20.815	192		3707	3330.15	2749.97	2226.59	3782.32	3779.06	3161.47	2577.57	2239.39	3917.03	3737.48	3486.55	2983.04	2766.04	2373	2004.27	2037.21	3785.53	3088.62	2788.18	2393.4	2171.71	2021.91	711744	639389	527994	427506	726205	725580	607003	494894	429963	752069	717596	669417	572743	531081	455615	384820	391144	726821	593015	535330	459532
dinj	b0226	[l]	9.4057	86
pepd	b0237	[e]	52.915	485		2595.9	2452.57	2189.4	1892.68	2517.54	2452.98	2328.99	2034.3	1910.36	2732.89	2897.25	2674.62	2689.45	2274.24	2044.24	2110.64	2113.3	2981.88	2602.42	2445.23	2183.29	1979.87	2109.05	1.25901e+06	1.1895e+06	1.06186e+06	917949	1.22101e+06	1.1897e+06	1.12956e+06	986633	926525	1.32545e+06	1.40516e+06	1.29719e+06	1.30439e+06	1.10301e+06	991458	1.02366e+06	1.02495e+06	1.44621e+06	1.26217e+06	1.18594e+06	1.0589e+06
gpt	b0238	[f]	16.97	152		1025.08	1155.27	1266.99	1338.57	1067.86	1129.72	1284.77	1328.98	1441.34	1258.93	1405.68	1655.46	1757.25	1598.26	1683.51	1840.36	1973.38	1251.74	1560	1554.72	1757.87	1791.81	1893.16	155812	175602	192582	203463	162314	171717	195284	202005	219084	191357	213664	251630	267102	242936	255894	279735	299953	190265	237121	236318	267196
frsa	b0239	[r]	47.008	414		236.205	205.781	163.774	143.357	206.341	280.755	233.625	169.263		205.061	163.154		144.664		95.7627	101.439	145.039		148.505	123.636	120.229	104.689	93.1156	97788.9	85193.1	67802.3	59349.7	85425.2	116233	96720.9	70074.9		84895.4	67545.9		59890.8		39645.8	41995.7	60046.1		61480.9	51185.3	49775
crl	b0240		15.655	133		2271.06	2680.98	3067.97	3185.71	2346.2	2705.75	3328.1	3045.16	3104.04	1924.24	2473.21	3024.57	3446.44	3301.49	3454.73	2662.46	1793.92	2113.82	3260.98	3771.83	3820.19	3184	3199.48	302051	356571	408040	423700	312044	359865	442637	405006	412837	255924	328937	402268	458376	439099	459479	354108	238592	281138	433711	501654	508085
prob	b0242	[e]	39.056	367		487.906	475.795	459.096	456.637	501.449	457.277	441.122	447.674	435.284	420.383	419.484	411.885	352.438	377.351	331.959	348.705	383.665	438.777	394.867	359.304	351.697	333.89	327.421	179062	174617	168488	167586	184032	167821	161892	164297	159749	154281	153951	151162	129345	138488	121829	127975	140805	161031	144916	131865	129073
proa	b0243	[e]	44.63	417		746.652	672.893	589.231	516.211	740.342	735.894	612.702	555.136	557.888	712.098	668.273	553.344	522.263	475.673	384.597	353.233	440.346	764.912	596.868	516.97	446.858	405.435	418.745	311354	280596	245709	215260	308723	306868	255497	231492	232639	296945	278670	230744	217784	198356	160377	147298	183624	318968	248894	215577	186340
insh	b0259		39.327	338								62.8777	54.5482		55.2836																				21252.7	18437.3		18685.9
argf	b0273	[e]	36.827	334		46.3621	108.309	123.152	166.124		60.4843	73.2807	95.2385	135.827	33.0951	27.7207		54.8648	37.0278	40.7542	31.7925	149.157			45.4266	31.426	54.9029	75.8981	15484.9	36175.1	41132.9	55485.4		20201.7	24475.7	31809.7	45366.1	11053.8	9258.72		18324.9	12367.3	13611.9	10618.7	49818.4			15172.5	10496.3
yagu	b0287	[s]	22.967	204		141.025		224.678	363.519	149.243	185.663	193.245	296.298	346.227	65.7988	57.777		72.1847	78.9266	113.39	118.995	140.367	65.1051	45.416	75.3218	61.849	88.4673	78.4733	28769.1		45834.3	74158	30445.5	37875.3	39422.1	60444.8	70630.3	13423	11786.5		14725.7	16101	23131.6	24275.1	28634.9	13281.4	9264.86	15365.7	12617.2
betb	b0312	[c]	52.911	490											155.687		169.715			211.541																		76286.5		83160.1			103655
yahk	b0325	[r]	37.978	349		3122.46	2035.81	1537.4	965.844	3075.23	2340.46	1583	1185.77	984.961	3927.97	2898.49	1924.25	1255.23	902.839	533.733	368.719	349.885	3268.9	1385.03	1055.04	615.474	400.814	346.563	1.08974e+06	710498	536552	337080	1.07326e+06	816819	552466	413834	343751	1.37086e+06	1.01157e+06	671563	438074	315091	186273	128683	122110	1.14084e+06	483375	368209	214800
yaho	b0329		9.8953	91		934.932	236.502	233.509	124.513	562.752	560.734	297.87	134.478	125.774	982.277	718.998	310.179	253.771					1385.9	476.073	221.044	145.669	81.4443	52.1939	85078.8	21521.7	21249.4	11330.7	51210.5	51026.8	27106.2	12237.5	11445.4	89387.2	65428.8	28226.3	23093.1					126116	43322.6	20115	13255.9
prpb	b0331	[g]	32.134	296		490.558	1690.61			479.03	429.529				1536.3	503.899	390.952						605.219	618.674					145205	500421			141793	127141				454743	149154	115722						179145	183128
prpc	b0333	[c]	43.102	389		1144.69	1413.95			825.335	567.559		91.8849		708.975	296.449	740.619		98.4901			92.1296	96.3635	1165.96					445286	550028			321055	220780		35743.2		275791	115318	288101		38312.6			35838.4	37485.4	453560
prpd	b0334	[r]	53.951	483		1009.33	679.058			1305.19	833.402				514.114	332.434	537.987						331.026	445.778					487509	327985			630407	402533				248317	160566	259848						159885	215311
codb	b0336	[f]	43.649	419					34.9955																	41.2091						14663.1																	17266.6
coda	b0337	[fr]	47.59	427		582.62	907.087	1197.79	1292	570.934	778.248	1086.4	1338.69	1371.78	591.636	704.893	1096.59	1454.29	1633.38	1905.42	1930.15	2069.42	523.199	1282.8	1606.6	1847.36	1928.2	2096.19	248779	387326	511457	551682	243789	332312	463892	571623	585752	252628	300989	468243	620983	697454	813613	824173	883644	223406	547756	686017	788823
laci	b0345		38.59	360
mhpr	b0346	[k]	31.322	277		126.084		43.7954		234.255					112.038									74.13	61.2763				34925.3		12131.3		64888.6					31034.5									20534	16973.5
yail	b0354		19.923	179		213.872	303.205	184.23	170.32						216.002	502.973	161.108								147.625			199.719	38283	54273.7	32977.2	30487.3						38664.3	90032.1	28838.4								26424.9
frma	b0356	[c]	39.359	369		312.355	295.837	260.971	222.492	318.61	286.395	270.851	251.509	256.732	401.111	369.059	345.071	339.131	327.848	298.481	274.249	262.482	438.499	333.624	330.682	291.883	295.715	273.533	115259	109164	96298.4	82099.7	117567	105680	99944.1	92806.7	94734.2	148010	136183	127331	125139	120976	110140	101198	96855.7	161806	123107	122022	107705
frmr	b0357		10.318	91											153.665									155.901		143.018		115.863										13983.5									14187		13014.6
hemb	b0369		35.624	324		394.557	401.068	368.371	373.314	414.11	446.545	394.008	391.144	399.47	404.356	419.229	441.206	427.352	440.431	474.377	381.855	398.753	374.892	380.106	390.895	372.676	367.246	371.417	127836	129946	119352	120954	134172	144681	127658	126731	129428	131011	135830	142951	138462	142700	153698	123721	129196	121465	123154	126650	120747
ddla	b0381	[m]	39.315	364		84.4259	100.608	116.191	156.552	88.6352	90.6399	119.407	153.086	144.56	110.679	120.888	135.156	159.275	170.963	207.136	244.597	306.633		145.23	174.746	197.361	223.357	272.958	30731	36621.5	42293.6	56985.1	32263.2	32992.9	43464.1	55723.4	52619.7	40287.3	44003.3	49196.7	57976	62230.6	75397.4	89033.4	111614		52863.6	63607.6	71839.3
irap	b0382		9.9374	86		1479.45	959.311	1079.89		1281.29	1221.68	1049.35	911.012	702.669	1181.34	1193.92	1006.42	828.8	1500.83	511.958		294.405	1373.51	963.63	861.038	589.113	596.421	449.496	127233	82500.7	92870.3		110191	105065	90244	78347	60429.6	101596	102677	86552.4	71276.8	129071	44028.4		25318.9	118122	82872.2	74049.3	50663.7
psif	b0384		11.686	106			431.884	403.237	334.38	669.749	757.341	601.848			1142.2			266.409						122.506			306.651			45779.7	42743.1	35444.2	70993.4	80278.2	63795.8			121073			28239.4						12985.6
proc	b0386	[e]	28.145	269		1063.32	963.481	810.408	737.271	1085.07	966.405	877.229	765.477	724.345	1207.01	1140.29	978.14	713.974	754.853	636.456	574.118	545.564	1158.33	832.604	730.865	639.522	570.815	523.121	286032	259177	218000	198326	291883	259963	235975	205913	194849	324685	306737	263120	192059	203055	171207	154438	146757	311591	223971	196603	172031
arol	b0388	[e]	19.151	174									100.467								28.5078			72.9004				58.2728								17481.3								4960.36			12684.7
yaie	b0391	[s]	10.234	94		386.897	418.464	424.84	378.752	364.054	432.236	470.68	393.685		335.366	337.053	375.669	304.761		249.066	271.685			308.972	431.909	225.571	237.76	172.415	36368.4	39335.6	39935	35602.7	34221.1	40630.2	44244	37006.3		31524.4	31683	35312.9	28647.5		23412.2	25538.4			29043.4	40599.5	21203.6
rdgc	b0393	[l]	33.993	303		293.928	289.286	293.355	298.209	290.701	318.399	276.767	313.362	313.365	309.279	314.043	357.584	295.975	341.191	283.374	392.644	369.41	293.247	318.315	338.999	361.682	341.901	368.212	89060.3	87653.5	88886.5	90357.4	88082.3	96474.9	83860.4	94948.8	94949.7	93711.6	95155	108348	89680.3	103381	85862.5	118971	111931	88853.9	96449.5	102717	109590
mak	b0394	[kg]	32.499	302			113.083	77.6194		149.404		108.649	77.0067	62.327	153.077									106.44	66.9993		49.9079	48.2601		34151.2	23441.1		45120		32811.9	23256	18822.8	46229.3									32144.9	20233.8
quea	b0405	[j]	39.43	356		68.7988		68.018	75.9113	74.6493	45.23		92.9642	96.5662	71.0908	67.2201			102.621		76.503	79.4052		67.6589	71.3033	68.3157	73.4481	85.5619	24492.4		24214.4	27024.4	26575.2	16101.9		33095.2	34377.6	25308.3	23930.4			36532.9		27235.1	28268.3		24086.6	25384	24320.4
tgt	b0406	[j]	42.593	375		188.692	208.2	260.03	316.549	170.506	212.443	255.407	332.717	351.62	204.931	306.796	421.597	399.411	354.119	561.625		594.142	174.115	293.566	399.58	489.961	565.79	666.777	70759.5	78075	97511.1	118706	63939.6	79666.1	95777.6	124769	131857	76849.2	115049	158099	149779	132795	210609		222803	65293	110087	149843	183735
yajc	b0407	[u]	11.887	110		6301.75	6568.28	6042.15	5838.19	6497.91	6657.56	6784.5	6159.51	5941.54	7363.55	7798.96	8171.16	7919.69	6901.37	6534.85	6589.11	5936.92	7765.6	7811.3	7609.15	6885.28	5684.46	6063.63	693193	722511	664637	642201	714770	732332	746296	677546	653569	809991	857886	898827	871165	759151	718833	724802	653061	854216	859243	837007	757380
secd	b0408	[u]	66.631	615		642.328	629.213	579.943	609.438	600.268	636.925	622.993	654.693	590.773	624.665	642.477	684.848	678.155	620.645	667.621	678.738	687.837	717.319	669.261	677.293	663.879	675.71	692.754	395032	386966	356665	374804	369165	391709	383141	402636	363325	384169	395123	421182	417065	381697	410587	417424	423020	441151	411596	416535	408285
secf	b0409	[u]	35.382	323		174.593	166.393	208.725	160.278	175.361	176.318	167.613	193.078	179.527	176.589	168.525	188.83	170.975		175.323			191.039	187.216	190.792	185.114	198.005	194.214	56393.4	53745	67418.1	51769.8	56641.5	56950.8	54139	62364.2	57987.4	57038.3	54433.5	60992	55225		56629.2			61705.6	60470.7	61625.7	59791.7
yajd	b0410		13.364	115				187.325	133.819	218.181	209.801		163.466	76.1897	169.376									199.353		158.063		95.4792			21542.4	15389.2	25090.9	24127.1		18798.6	8761.82	19478.2									22925.6		18177.2
tsx	b0411	[m]	33.589	294		1412.06	1517.35	1477.05	1234.61	1419.18	1429.57	1551.83	1402.74	1327.35	1867.44	1715.45	1767.92	1657.67	1326.85	1288.63	1321.81	1447.68	1872.96	1676.54	1518.07	1419.16	1295.64	1412.21	415145	446102	434254	362977	417238	420293	456238	412405	390242	549026	504342	519770	487356	390094	378857	388612	425619	550650	492903	446311	417233
nrdr	b0413		17.229	149		391.868	358.901	310.682	287.636	361.089	315.492	321.66	310.011	299.968	323.721	257.346	296.219	277.239		237.462	203.516	223.629		319.519	283.129	250.36	212.428	217.629	58388.4	53476.2	46291.7	42857.7	53802.3	47008.2	47927.3	46191.7	44695.2	48234.4	38344.5	44136.7	41308.5		35381.8	30323.8	33320.7		47608.4	42186.2	37303.7
ribd	b0414	[h]	40.338	367
ribe	b0415	[h]	16.156	156		3669.82	4071.2	4145.57	3893.57	3700.14	3836.5	4074.75	4153.56	4131.82	3520.33	3771.58	4471.46	5164.02	4642.97	4594.96	4247.93	4383.46	3575.4	4353.33	4695.8	4368.42	4457.6	4078.72	572492	635107	646709	607397	577222	598493	635661	647955	644564	549171	588366	697548	805587	724303	716814	662677	683819	557763	679120	732546	681474
nusb	b0416	[k]	15.689	139		1077.74	1144.34	1150.49	1194.04	1100.43	1195.52	1147.98	1107.56	1176.92	988.024	1058.28	1209.8	1174.22	1201.08	1119.71	1241.96	1243.9	923.929	1199.65	1257.44	1299.93	1302.25	1370.61	149805	159063	159918	165971	152960	166177	159569	153951	163592	137335	147101	168162	163217	166950	155639	172632	172902	128426	166751	174784	180691
thil	b0417	[h]	35.07	325		50.7784	51.0485			50.5355	49.6364		36.9901			30.781		45.5095						70.9481	61.0893	51.5956	50.9471		16503	16590.8			16424	16131.8		12021.8			10003.8		14790.6						23058.1	19854	16768.6
yajo	b0419	[c]	36.42	324		247.367	155.472	114.011	75.6945	244.862	169.83	159.166	93.942		209.915	177.781					40.3025	46.134		123.037	85.7394	56.8085	43.2151	32.3541	80146.8	50373	36939.4	24525	79335.2	55025	51569.9	30437.2		68012.3	57601					13058	14947.4		39863.8	27779.6	18406
dxs	b0420	[hi]	67.616	620		145.502	150.242	129.171	118.334	137.825	136.644	133.942	142.387	102.396	148.583	122.356	140.891		120.197	113.546	106.175	109.251	135.715	146.506	139.796	132.496	113.36	116.313	90211.4	93150	80086.1	73367.3	85451.3	84719.2	83044.2	88279.9	63485.7	92121.7	75861	87352.6		74522.4	70398.4	65828.3	67735.9	84143.4	90833.9	86673.6	82147.5
ispa	b0421	[h]	32.159	299		92.2356	78.2674	69.0418	67.0447	78.3179	66.8096	70.2691	62.6885	63.7002	95.1689	61.6771	74.0538	55.1872								71.862	64.6485	71.7609	27578.5	23402	20643.5	20046.4	23417	19976.1	21010.5	18743.9	19046.4	28455.5	18441.5	22142.1	16501								21486.7
xseb	b0422	[l]	8.9518	80
thii	b0423	[h]	54.972	482		87.2206	111.884	131.602	169.093	84.0833	100.962	120.101	154.941	167.22	71.9754		123.544	138.115	168.496	209.728	193.822	242.778	101.925	138.402	166.026	191.072	195.669	231.79	42040.3	53928	63432.2	81503	40528.1	48663.5	57888.8	74681.7	80600.1	34692.2		59548.1	66571.4	81215	101089	93422.4	117019	49127.8	66709.9	80024.3	92096.6
yajl	b0424		20.777	196			207.676	170.263	200.842	180.498	192.037	182.623	194.981	172.637	180.657	178.146	189.118		156.084					162.142	157.026	162.649	134.37	148.81		40704.5	33371.6	39365.1	35377.6	37639.2	35794.1	38216.3	33836.9	35408.7	34916.5	37067.2		30592.5					31779.9	30777.1	31879.2
yajq	b0426	[s]	18.344	163		6824.01	6261.52	5920.85	5492.2	6812.77	6655.69	6127.83	5611.26	5422.56	7525.32	7372.02	6989.17	6028.63	5978.79	5555.42	4911.49	3265.04	7443.33	6450.97	6013.77	5872.8	5807.51	5415.7	1.11231e+06	1.02063e+06	965099	895228	1.11048e+06	1.08488e+06	998837	914636	883877	1.22663e+06	1.20164e+06	1.13923e+06	982666	974542	905533	800573	532202	1.21326e+06	1.05151e+06	980244	957266
cyod	b0429	[c]	12.029	109		138.747	135.08	128.988	151.927	141.996	154.841	168.902	228.103		185.327		250.347	272.199	284.519	354.574	369.01	352.762	192.869	53.993		315.234	326.85	334.877	15123.4	14723.8	14059.7	16560	15477.5	16877.7	18410.3	24863.2		20200.7		27287.9	29669.7	31012.6	38648.6	40222.1	38451.1	21022.8	5885.23		34360.5
cyob	b0431	[c]	74.367	663		324.62	402.88	476.767	530.822	350.664	367.457	462.94	555.408	549.851	407.524	389.771	541.381	686.656	708.423	777.12	883.721	862.929	354.706	614.904	716.221	803.11	838.46	932.39	215223	267109	316097	351935	232490	243624	306929	368236	364551	270188	258418	358935	455253	469684	515231	585907	572122	235170	407682	474854	532462
cyoa	b0432	[c]	34.911	315		2330.56	2784.53	3197.43	3852.74	2277.19	2559.82	3044.48	3653.24	3945.64	2871.89	3152.55	3823.26	4353.91	4724.61	5296.81	5911.93	5798.45	2841.84	4018.03	4671.03	5170.25	5361.91	5823.29	734127	877128	1.00719e+06	1.21361e+06	717314	806344	959012	1.15077e+06	1.24288e+06	904645	993055	1.20433e+06	1.37148e+06	1.48825e+06	1.66849e+06	1.86226e+06	1.82651e+06	895181	1.26568e+06	1.47137e+06	1.62863e+06
yajg	b0434		20.95	192		1849.5	2004.74	1876.24	1839.75	1919.5	2170.26	1986.2	1937.97	1869.22	1833.87	2080.75	2034.54	2128.61	2172.06	2296.92	2147.19	1948.71	2074.67	2007.02	2196.31	1933.3	2006.14	2026.39	355105	384910	360238	353232	368543	416691	381351	372090	358891	352104	399505	390631	408692	417035	441008	412261	374153	398337	385348	421691	371193
bola	b0435		11.994	105		251.849	304.232	297.324	352.414	170.709	248.298	256.993	377.33	293.823	173.494	348.285		379.213		289.733	282.979			242.493	271.423	245.238	134.163	137.429	26444.1	31944.4	31219.1	37003.5	17924.5	26071.3	26984.3	39619.6	30851.4	18216.9	36569.9		39817.3		30421.9	29712.8			25461.8	28499.4	25750
tig	b0436	[o]	48.192	432		10917.3	13160.6	14034	14771.3	11103.2	11981.7	13840.8	14476.2	14951.4	11187.2	12531.9	14812.4	16601	17139.3	17856	17725.4	18949.1	11899.8	15887.6	17411.7	17680.3	17342.8	18548.8	4.71629e+06	5.68537e+06	6.0627e+06	6.38119e+06	4.79656e+06	5.17609e+06	5.97923e+06	6.25371e+06	6.459e+06	4.83289e+06	5.4138e+06	6.39897e+06	7.17165e+06	7.40416e+06	7.7138e+06	7.65736e+06	8.18602e+06	5.14072e+06	6.86345e+06	7.52186e+06	7.6379e+06
clpp	b0437	[ou]	23.186	207		1774.01	1916.12	1699.78	1656.92	1716.1	1698.36	1635.31	1693.43	1666.77	1563.4	1563.23	1535.4	1620.76	1439.05	1367.31	1131.59	1347.82	1712.94	1507.25	1467.83	1371.22	1334.05	1250.76	367220	396637	351855	342982	355232	351561	338509	350541	345021	323623	323588	317828	335497	297884	283032	234238	278999	354580	312002	303842	283842
clpx	b0438	[o]	46.355	424		1362.09	1497.07	1671.09	1726.68	1411.89	1506.02	1570	1688.66	1697.67	1196.41	1146.69	1361.12	1432.85	1527.51	1616.27	1502.26	1723.34	1203.07	1417.4	1546.78	1460.31	1514.65	1508.16	577525	634756	708542	732113	598643	638552	665679	715992	719813	507276	486196	577113	607530	647662	685299	636960	730696	510103	600977	655837	619170
lon	b0439	[o]	87.437	784		867.613	901.525	940.203	950.656	862.556	880.883	924.586	946.615	971.835	793.028	794.274	872.026	959.576	922.596	916.59	899.543	925.739	861.672	901.313	967.225	929.399	917.723	923.101	680209	706795	737119	745314	676244	690612	724875	742146	761919	621734	622711	683668	752308	723315	718606	705242	725779	675551	706630	758305	728649
hupb	b0440	[l]	9.2255	90		50183.5	47557.8	34338	28330.1	49710.8	49410.3	41611.2	36034.6	26581.8	51283	50637.1	47271.1	43225.1	36482.5	33503.5	28686.4	15816.2	53400	46012.4	36807.2	32309.8	27754.7	23322.7	4.51651e+06	4.28021e+06	3.09042e+06	2.54971e+06	4.47398e+06	4.44692e+06	3.74501e+06	3.24312e+06	2.39236e+06	4.61547e+06	4.55734e+06	4.2544e+06	3.89026e+06	3.28343e+06	3.01531e+06	2.58178e+06	1.42345e+06	4.806e+06	4.14112e+06	3.31265e+06	2.90788e+06
ppid	b0441	[o]	68.149	623		1444.9	1406.94	1476.65	1257.47	1447.17	1502.95	1477.92	1445.28	1291.99	1325.64	1315.98	1370.99	1411.89	1327.98	1247.45	1315.21	1275.48	1469.42	1392.22	1417.39	1276.27	1243.48	1291.06	900172	876524	919955	783402	901588	936340	920746	900411	804911	825873	819857	854128	879607	827332	777163	819374	794623	915446	867356	883033	795116
quec	b0444		25.514	231		103.145	105.463	112.472	119.703	127.577	118.603			110.977	112.232									114.364		99.5872	104.074	105.529	23826.4	24362	25981.1	27651.3	29470.4	27397.3			25635.7	25925.6									26418.2		23004.7
glnk	b0450	[e]	12.259	112		117.754	185.325	41.7557		145.347	80.4171	97.4965	57.1192	64.2224	134.427		41.1791					326.981		99.5827	92.4994	93.0318	139.742	252.686	13188.5	20756.5	4676.64		16278.8	9006.71	10919.6	6397.35	7192.91	15055.8		4612.06					36621.9		11153.3	10359.9	10419.6
tesb	b0452	[i]	31.966	286					102.534	99.8864	113.616	104.558		95.9949	106.117		94.9317					72.7953			80.2177							29324.7	28567.5	32494.2	29903.5		27454.6	30349.4		27150.5					20819.4			22942.3
ybay	b0453		19.431	190		1579.39	1585.89	1640.1	1349.72	1567.93	1371.09	1578.65	1535.91	1320.64	1697.06	1372.12	1059.94	1019.26	1099.93	685.746	641.857	845.578	1715.21	1063.42	843.721	750.455	899.894	616.706	300085	301320	311620	256447	297907	260507	299943	291823	250921	322441	260703	201388	193659	208987	130292	121953	160660	325890	202049	160307	142586
ylac	b0458		18.267	156
acrb	b0462	[v]	113.57	1049		211.259	205.711	221.782	196.343	197.515	214.975	212.869	206.437	204.022	196.079	204.585	229.74	242.021	191.809	204.591	202.363	199.241	231.759	197.844	201.256	191.711	191.818	193.281	221611	215791	232649	205964	207194	225508	223300	216552	214019	205687	214610	240997	253880	201208	214616	212279	209004	243115	207538	211118	201104
acra	b0463	[m]	42.196	397		2021.38	2078.53	1965.8	1829.48	2097.27	2022.3	1946.72	1979.88	1872.87	1966.91	1883.53	2041.05	1984.9	1763.99	1852	1780.69	1723.57	2195.02	1947.77	1861.79	1818.05	1679.1	1800.97	802486	825175	780423	726305	832615	802853	772848	786012	743528	780864	747761	810298	788007	700302	735242	706932	684257	871423	773266	739132	721768
kefa	b0465	[m]	127.21	1120			23.9352		15.2564		12.8943	11.0277	9.89782	16.1562	10.2997	12.102	13.7222			15.2285	12.3624		36.5107	16.5164		12.1188	15.2429			26807.5		17087.1		14441.6	12351	11085.6	18095	11535.6	13554.3	15368.9			17055.9	13845.9		40892	18498.4		13573
ybam	b0466		6.0248	53		13.043	13.4729	11.2961																					691.279	714.061	598.692
apt	b0469	[f]	19.859	183		505.477	577.862	575.411	557.635	510.661	580.485	571.343	669.24	667.528	460.534	512.237	618.013	880.78	804.588	714.457	715.768	663.33	572.594	662.071	671.667	745.696	728.272	735.875	92502.2	105749	105300	102047	93451	106229	104556	122471	122158	84277.7	93739.4	113096	161183	147240	130746	130986	121389	104785	121159	122915	136462
ybab	b0471	[s]	12.015	109		2718.63	2839.69	2791	2856.94	2691.16	2724.95	2869.82	2756.71	2917.36	2891.82	3105.63	2988.93	3194.91	3065.26	3065.03	2797.18	2674.13	2984.97	3083.75	3054.57	3083.88	3016.77	2905.63	296331	309526	304219	311407	293336	297020	312811	300482	317992	315208	338514	325793	348245	334114	334088	304892	291480	325361	336129	332948	336143
htpg	b0473	[o]	71.422	624		1901.73	1861.83	1869.4	1863.85	1963.44	1965.2	1882.22	1985.28	1867.95	1997.38	2013.95	2260.14	2374.13	2436.21	2275.84	2312.21	2093.42	1993.16	2278.71	2511.56	2543.68	2374.05	2274.86	1.18668e+06	1.16178e+06	1.16651e+06	1.16305e+06	1.22519e+06	1.22628e+06	1.1745e+06	1.23881e+06	1.1656e+06	1.24637e+06	1.25671e+06	1.41033e+06	1.48145e+06	1.5202e+06	1.42012e+06	1.44282e+06	1.30629e+06	1.24373e+06	1.42191e+06	1.56721e+06	1.58725e+06
adk	b0474	[f]	23.586	214		4391.77	4595.87	4223.76	4797.2	4152.33	4483.06	4442.66	4137.61	4937.01	4141.56	4437.08	4787.08	5132.86	5003.48	4845.95	4881.36	3511.32	4273.56	5133.28	5145.72	5147	5311.43	5624.16	939838	983517	903884	1.0266e+06	888599	959374	950730	885448	1.05652e+06	886293	949535	1.02443e+06	1.09843e+06	1.07074e+06	1.03703e+06	1.04461e+06	751422	914543	1.09852e+06	1.10118e+06	1.10146e+06
hemh	b0475		35.884	320
gsk	b0477	[g]	48.448	434
usha	b0480	[f]	60.823	550		255.303	236.993	194.437	165.68	271.572	232.194	255.02	198.964	177.915	268.054	242.85	208.628	187.138	190.714	160.314	128.253	59.9136	224.929	221.66	185.268	152.628	177.082	124.341	140416	130346	106940	91124	149364	127707	140261	109430	97853.1	147430	133567	114746	102926	104893	88172.8	70539.2	32952.5	123711	121913	101898	83945.4
ybak	b0481	[s]	17.093	159		272.311	235.069	228.614	244.377	225.283		216.091	209.509	227.389	175.159			179.543	212.569		259.002			181.442	193.129	196.771	202.528	240.43	43297.5	37375.9	36349.7	38856	35820.1		34358.5	33311.9	36154.9	27850.3			28547.3	33798.5		41181.3			28849.2	30707.5	31286.6
copa	b0484	[p]	87.872	834		223.95	208.942	188.967	172.027	213.178	215.49	199.247	176.696	167.219	203.596	218.717	214.119	201.388	130.817	146.901	172.304	172.294	193.357	188.952	165.36	162.486	139.921	110.104	186774	174258	157598	143471	177790	179718	166172	147364	139460	169799	182410	178575	167958	109102	122515	143702	143693	161260	157586	137910	135513
ybbl	b0490	[r]	25.382	225		58.5561	92.5159	95.0317				92.5056				93.3938	89.1502	86.5701		69.6157		84.4447	86.3441	70.0376	60.9487	79.0807	75.1006		13175.1	20816.1	21382.1				20813.8				21013.6	20058.8	19478.3		15663.5		19000.1	19427.4	15758.5	13713.5	17793.2
ybbn	b0492		31.791	284		831.904	856.188	835.12	803.986	837.48	819.473	903.924	862.539	840.967	813.078	790.006	831.082	848.073	810.815	784.991	718.157	733.619	843.037	873.143	855.703	795.205	758.262	755.776	236261	243158	237174	228332	237844	232730	256714	244961	238835	230914	224362	236027	240853	230271	222938	203957	208348	239423	247972	243020	225838
ybbo	b0493	[iqr]	29.41	269					40.5635																							10911.6
ybba	b0495	[q]	24.533	228																					25.5135																							5817.07
allr	b0506	[k]	29.269	271		102.546	112.878	116.228	122.271	104.823	116.658	113.016	126.94	133.52	72.1303	83.9828	97.3156	92.3326	78.8958	88.3694			88.6851	87.7793	93.7211	93.0501	91.3666	105.459	27790	30589.9	31497.8	33135.4	28407.1	31614.3	30627.4	34400.8	36183.8	19547.3	22759.3	26372.5	25022.1	21380.7	23948.1			24033.7	23788.2	25398.4	25216.6
purk	b0522	[f]	39.461	355		47.6134	56.2387	65.9388					76.8283	81.6679	37.9765									49.8795	58.5396	60.2781	78.5957	80.6223	16902.7	19964.7	23408.3					27274.1	28992.1	13481.7									17707.2	20781.6	21398.7
pure	b0523	[f]	17.78	169		600.704	671.73	771.225	1108.55	621.197	677.779	731.949	882.169	1113.64	582.457		683.798	768.687	763.633	868.712	960.793	1331.03	648.982	739.409	848.52	872.497	946.716	1020.78	101519	113522	130337	187345	104982	114545	123699	149087	188205	98435.3		115562	129908	129054	146812	162374	224944	109678	124960	143400	147452
ppib	b0525	[o]	18.153	164		3772.49	3803.15	3686.85	3921.29	4091.81	4004.39	3783.72	3560.14	3925.71	3779.6	3755.83	3831.32	3487.87	3499.98	3432.55	3281.51	2726.04	3827.04	3825.54	3785.3	3613.09	3589.29	3481.13	618689	623717	604644	643091	671057	656720	620530	583863	643816	619855	615957	628337	572010	573997	562939	538167	447070	627635	627389	620789	592546
cyss	b0526	[j]	52.202	461		398.817	436.004	482.791	533.144	390.638	444.239	484.579	505.84	532.503	383.137	422.066	463.83	494.9	498.51	537.286	546.875	588.903	436.732	452.255	506.333	519.663	538.882	597.654	183854	200998	222567	245779	180084	204794	223391	233192	245484	176626	194572	213826	228149	229813	247689	252109	271484	201333	208489	233420	239565
ybcj	b0528	[s]	7.3895	70		741.678	918.699	922.257	1006.95	820.235	818.684	978.912	934.837	1035.18	722.941	758.436	859.308	949.051	857.732	930.095	999.581	1004.41	746.292	878.162	863.725	1009.45	1022.28	902.241	51917.4	64308.9	64558	70486.6	57416.5	57307.9	68523.8	65438.6	72462.7	50605.8	53090.5	60151.5	66433.6	60041.3	65106.6	69970.7	70309	52240.4	61471.4	60460.8	70661.3
fold	b0529	[h]	31.043	288		300.83	337.557	359.207	395.386	313.887	338.556	355.019	364.125	448.613	294.446	308.345	336.468	375.82	402.017	400.985	406.291	416.784	344.484	318.248	346.507	380.139	397.439	412.496	86638.9	97216.5	103452	113871	90399.4	97504.1	102245	104868	129201	84800.5	88803.3	96902.8	108236	115781	115484	117012	120034	99211.3	91655.3	99794.1	109480
nmpc	b0553	[m]	40.302	365
bord	b0557		10.447	97		560.295	716.14	1136.99	1674.87	503.817	595.039	854.33	1190.67	1555.3	1066.17	1382.5	1794.69	2248.11	2147.36	2929.5	3860.77	3541.93	1529.12	1775.15	2029.88	2463.15	2875.22	3183.91	54348.6	69465.5	110288	162462	48870.3	57718.8	82870	115495	150864	103419	134102	174085	218066	208294	284162	374495	343567	148325	172189	196899	238926
ompt	b0565	[m]	35.562	317		5484.85	5439.36	5929.14	7001.4	5584.68	5780.99	5719.22	6567.73	7223.89	6016.46	6242.17	6492.73	6783.75	6561.03	6935.22	7285.47	7011.36	5275.64	5844.4	6215.02	6217.27	7150.3	6481.77	1.7387e+06	1.72428e+06	1.87954e+06	2.21944e+06	1.77034e+06	1.83257e+06	1.81299e+06	2.08197e+06	2.28997e+06	1.90722e+06	1.97877e+06	2.0582e+06	2.15045e+06	2.07985e+06	2.19846e+06	2.30949e+06	2.2226e+06	1.67238e+06	1.85268e+06	1.97016e+06	1.97087e+06
cusr	b0571	[tk]	25.394	227
cusc	b0572	[mu]	50.269	457		458.546	436.399	265.902	195.696	480.559	455.071	323.272	219.209	194.133	598.303	459.446	517.23	334.733		284.852	284.131	315.651	422.319	414.149	346.859	297.415	311.312	272.248	209556	199434	121517	89433.2	219616	207967	147736	100179	88718.8	273425	209967	236374	152973		130177	129848	144253	193000	189266	158515	135919
cusb	b0574	[m]	44.304	407		396.346	374.088	221.899	133.737	418.498	298.948	243.728	166.355	85.6561	332.607		555.241				155.7		176.229	352.016	363.315	251.687	153.512	267.839	161313	152254	90312.8	54430.9	170329	121672	99197.4	67706.6	34862	135371		225983				63369.9		71725.2	143271	147869	102436
nfsb	b0578		23.905	217		2216.71	2213.71	2244.08	2276.84	2287.66	2257.59	2199.2	2210.96	2342.61	2350.49	2475.16	2462.43	2445.74	2342.8	2354.1	2169.79	2014.72	2486.64	2472.13	2449.92	2408.63	2289.38	2220.86	481027	480375	486966	494074	496422	489897	477226	479777	508346	510056	537110	534348	530725	508388	510839	470844	437194	539600	536453	531633	522673
fepa	b0584	[p]	82.106	746		39.5886	30.8499	35.6796	37.0933	34.633			45.5875		37.1487						25.8147			34.05	34.8961	25.3907	32.289		29533.1	23014	26617	27671.6	25836.2			34008.3		27712.9						19257.8			25401.3	26032.5	18941.5
fepb	b0592	[p]	34.283	318					35.98			34.6144					45.6907															11441.6			11007.4					14529.6
ente	b0594	[q]	59.111	536
entb	b0595	[q]	32.554	285				81.0566	63.2324	68.7968	74.3729		49.2825		101.379		128.593		96.0301					80.3119	65.91	40.9303	48.4765				23101.1	18021.2	19607.1	21196.3		14045.5		28893.1		36649.1		27368.6					22888.9	18784.3	11665.1
enta	b0596	[iqr]	26.249	248
csta	b0598	[t]	75.104	701		1283.98	1287.88	796.334	361.744	1349.06	1063.77	975.839	582.394	308.701	1103.79	1263.22	1228.46	864.413	798.863	479.147	279.97	165.687	608.747	1605.77	777.68	833.815	561.49	373.962	900073	902807	558230	253582	945691	745703	684063	408258	216400	773754	885518	861147	605954	560003	335882	196259	116146	426732	1.12565e+06	545154	584504
ybdh	b0599	[c]	39.091	362				116.905		81.2069	90.9774	114.119	126.93	54.0458	39.4678									39.3371							42319.5		29396.9	32933.8	41311.2	45948.7	19564.6	14287.3									14240
ybdl	b0600	[e]	42.962	386
dsbg	b0604	[o]	27.495	248					20.7204																32.8254							5138.66																8140.71
ahpc	b0605	[o]	20.761	187		51210.1	47391.2	38529.6	34328.4	54229.7	51521.3	43753.7	37286.4	35966.7	58897.7	58308.6	50898.2	43085.7	37347.4	33051.2	29203.3	27553	58442.7	43648.7	38625.3	32458	29853.6	27664.5	9.57629e+06	8.86215e+06	7.20504e+06	6.41942e+06	1.0141e+07	9.63449e+06	8.18194e+06	6.97256e+06	6.72577e+06	1.10139e+07	1.09037e+07	9.51797e+06	8.05703e+06	6.98396e+06	6.18057e+06	5.46102e+06	5.15241e+06	1.09288e+07	8.16231e+06	7.22293e+06	6.06965e+06
ahpf	b0606	[o]	56.176	521		1323.59	1298.97	1270.41	1258.01	1359.84	1339.18	1294.98	1322.5	1311.34	1255.52	1287.78	1282.88	1324.14	1305.94	1195.97	1185.76	1234.71	1184.8	1212.92	1277.88	1208.12	1227.54	1199.57	689590	676765	661885	655425	708475	697713	674684	689023	683206	654126	670932	668381	689875	680397	623101	617779	643282	617280	631930	665775	629428
uspg	b0607	[t]	15.935	142		2412.41	2175.61	2152.38	1810.98	2400	2172.35	1814.06	1960.91	1982.39	3276.74	2031.75	2443.1	1872.63	1569.95		1334.05	1316.48	3583.36	2264.86	1825.24	1577.31	1325.18	1617.28	342563	308937	305638	257159	340800	308474	257597	278450	281499	465297	288508	346920	265913	222933		189434	186940	508837	321611	259184	223978
rnk	b0610	[k]	14.927	136				409.296	322.728	669.022					594.357						102.037			554.092	632.016	698.121		362.963			55664.2	43891.1	90987					80832.6						13877			75356.5	85954.2	94944.4
cspe	b0623	[k]	7.4634	69		20264.5	20892.6	21248.6	24902.7	21515.2	21172	24182.1	20514.1	22629.3	20870.7	24649.7	26116.6	25479.4	22333.7	23991.5	25618.5	20367.6	24238.5	25360.2	23250.1	26065.3	23446.6	26122.7	1.39825e+06	1.44159e+06	1.46616e+06	1.71829e+06	1.48455e+06	1.46087e+06	1.66856e+06	1.41547e+06	1.56142e+06	1.44008e+06	1.70083e+06	1.80205e+06	1.75808e+06	1.54103e+06	1.65542e+06	1.76768e+06	1.40537e+06	1.67246e+06	1.74986e+06	1.60425e+06	1.79851e+06
tate	b0627	[u]	7.0242	67		83.3479		114.186	179.269																	152.644	144.809	154.518	5584.31		7650.44	12011.1																	10227.2
lipa	b0628	[h]	36.071	321		434.111	456.707	388.883	337.093	397.169	490.696	424.818	360.752	351.683	570.7	628.452	742.258	658.065	579.457	927.889	606.799	719.115	811.337	658.984	644.21	619.201	613.606	613.064	139350	146603	124831	108207	127491	157514	136367	115801	112890	183195	201733	238265	211239	186006	297852	194783	230836	260439	211534	206791	198764
ybed	b0631	[s]	9.8272	87		2250.89	2138.8	1868.93	1830.35	2457.43	2111.4	1991.79	2087.06	2190.02	2303.12	1911.2	2484.4	1665.7	1876.6	1834.6	1769.08	1234.8	2127.21	2467.24	2053.07	2156.03	1906.92	1801.22	195828	186075	162597	159240	213796	183692	173286	181574	190532	200372	166274	216143	144916	163264	159610	153910	107428	185067	214650	178617	187575
daca	b0632	[m]	44.443	403		963.443	1160.89	1271.42	1440.8	1013.1	1084.57	1253.14	1345.1	1541.67	924.268	985.4	1317.32	1417.6	1521.12	1673.24	1798.14	1902.73	936.883	1405.69	1505.66	1662.51	1626.06	1689.52	388267	467837	512382	580643	408277	437083	505016	542077	621294	372480	397116	530880	571293	613011	674316	724652	766802	377564	566493	606783	669993
rlpa	b0633	[m]	37.528	362		204.948	205.951	227.018	233.544	202.78	205.223	185.372	221.655	216.832	187.312	184.449	195.668	225.478	179.064	201.015	218.938	244.357	187.618	190.593	197.132	219.735	212.476	224.677	74191.1	74554.4	82180.6	84543	73406.4	74290.7	67104.8	80239.2	78493.1	67807.1	66770.5	70832	81623.1	64821	72767.4	79255.5	88457.4	67917.9	68994.7	71361.9	79544.2
ybeb	b0637		11.582	105		189.549	205.968	250.956	317.19	147.6	185.443	245.471			147.429	163.027		318.76	229.934	355.768				252.279		352.001	326.644	396.977	19902.6	21626.7	26350.4	33305	15498	19471.5	25774.5			15480	17117.9		33469.8	24143	37355.7				26489.3		36960.1
lpte	b0641		21.356	193		450.314	404.048	420.43	343.024	422.343	423.089	324.786	357.756	358.555	472.274	478.698	400.853	327.695	287.01	314.932	292.085	293.422	481.829	339.023	331.245	307.692	259.796	294.247	86910.7	77981.3	81143	66203.6	81512.2	81656.1	62683.8	69047	69201.2	91148.9	92388.8	77364.6	63245.2	55393	60781.9	56372.5	56630.5	92993.1	65431.4	63930.3	59384.5
leus	b0642	[j]	97.233	860		1554.59	1597	1597.94	1629.49	1554.56	1546.97	1530.41	1638.14	1677.55	1414.55	1508.75	1515.25	1632.27	1699.24	1678.26	1724.39	1890.94	1474.07	1553.33	1618.67	1625.91	1714.67	1749.73	1.33695e+06	1.37342e+06	1.37423e+06	1.40136e+06	1.33692e+06	1.33039e+06	1.31616e+06	1.4088e+06	1.44269e+06	1.21652e+06	1.29753e+06	1.30311e+06	1.40375e+06	1.46135e+06	1.44331e+06	1.48297e+06	1.62621e+06	1.2677e+06	1.33586e+06	1.39205e+06	1.39828e+06
ybel	b0643		18.797	160		984.883	576.448	507.823	267.479	948.462	678.34	530.355	345.256	312.847	1267.38	982.563	603.502	419.496	252.452	150.774	109.58		1298.5	586.068	385.301	206.583	140.825	122.429	157581	92231.7	81251.6	42796.6	151754	108534	84856.8	55240.9	50055.5	202780	157210	96560.3	67119.3	40392.3	24123.9	17532.7		207760	93770.9	61648.1	33053.3
hscc	b0650	[o]	61.986	556																						178.901																							99469
riha	b0651	[f]	33.823	311		123.039	147.709	121.053	90.2787	142.739		120.487			113.885									154.88	94.4497	157.435	161.231	119.707	38265.2	45937.6	37647.3	28076.7	44391.8		37471.3			35418.3									48167.7	29373.8	48962.2
gltl	b0652	[e]	26.661	241		72.0159	62.6564	56.5125	43.4086	76.1257	91.7431				87.1212									88.0186		84.418	83.2902	74.0263	17355.8	15100.2	13619.5	10461.5	18346.3	22110.1				20996.2									21212.5		20344.7
glti	b0655	[et]	33.42	302		2407.32	1834.15	1076.15	781.659	2265.67	2228.11	1514.4	844.873	776.744	3118.42	2452.47	1732.74	1878.29	1263.07	845.379	718.758	168.223	2472.45	1922.44	1373.93	1004.61	1445.98	625.418	727010	553915	324997	236061	684231	672890	457350	255152	234577	941764	740647	523286	567242	381448	255304	217065	50803.4	746679	580578	414928	303393
lnt	b0657	[m]	57.065	512		27.2719	28.6394	35.5034	22.072													21.0477					32.3308	31.4481	13963.2	14663.4	18177.7	11300.9													10776.4
ybex	b0658	[p]	33.298	292		178.639	230.92	230.771	233.139	196.288	228.169	252.884	219.107	178.023	168.84	205.791			154.173	157.298	175.707		168.243	187.638	182.077	196.076	151.409	202.407	52162.7	67428.6	67385.2	68076.6	57316	66625.4	73842.2	63979.1	51982.8	49301.4	60090.9			45018.4	45930.9	51306.3		49127	54790.2	53166.6	57254.1
ybez	b0660	[t]	39.038	346		722.361	789.752	786.686	795.077	752.121	677.777	807.539	808.227	802.399	693.428	728.679	749.636	725.38	716.155	735.062	754.357	749.768	752.824	722.851	723.868	805.656	739.433	840.634	249937	273254	272193	275097	260234	234511	279409	279647	277630	239926	252123	259374	250981	247790	254331	261008	259420	260477	250107	250458	278757
miab	b0661	[j]	53.662	474		147.639	180.102	242.047	280.282	155.402	177.038	218.965	274.679	294.359	146.895	196.377	216.997	347.763	264.265		289.107	421.632		274.197	291.681	305.383	338.955	394.31	69980.8	85368.3	114730	132854	73660.6	83916	103789	130198	139526	69628.4	93082.9	102857	164840	125261		137037	199854		129969	138257	144752
ubif	b0662	[hc]	42.953	391						47.361			65.5274		48.2975	50.2184	38.9568									35.2779							18518.1			25621.2		18884.3	19635.4	15232.1									13793.7
asnb	b0674	[e]	62.658	554		318.16	349.215	380.986	390.898	343.351	332.373	355.769	389.068	384.531	200.928	217.31	253.348	258.469	362.173	291.895	279.473	287.79	203.782	231.683	262.193	249.517	261.103	260.957	176261	193465	211066	216558	190217	184135	197096	215543	213030	111314	120390	140355	143192	200644	161710	154828	159435	112895	128353	145255	138232
nagd	b0675	[g]	27.163	250		183.566	184.303	192.023	182.31	204.146	197.059	185.901	169.584	169.053	217.066	210.759	219.249	221.717	169.256			163.071		177.34	183.217	163.608	154.518	161.15	45891.5	46075.8	48005.8	45577.6	51036.6	49264.7	46475.3	42396	42263.3	54266.6	52689.6	54812.3	55429.3	42313.9			40767.7		44335.1	45804.1	40901.9
nagc	b0676	[kg]	44.541	406		137.79			40.0518															119.051		75.344	118.594	100.654	55942.6			16261															48334.8		30589.7
naga	b0677	[g]	40.949	382		99.7622	92.0136	73.2973		116.907		82.3294	61.137	52.6479	106.797	117.427					63.6237	52.7757		95.5963	74.5725	70.8206	66.4966	53.6798	38109.2	35149.2	27999.6		44658.6		31449.8	23354.4	20111.5	40796.6	44857					24304.3	20160.3		36517.8	28486.7	27053.5
nagb	b0678	[g]	29.774	266		763.705	694.133	528.442	350.938	816.193	617.533	559.429	400.536	393.66	882.974	751.494	697.854	606.824	488.78	371.352	311.585	254.589	867.415	628.673	520.708	430.831	336.561	264.577	203146	184639	140565	93349.4	217107	164264	148808	106542	104713	234871	199897	185629	161415	130015	98779.7	82881.7	67720.6	230732	167227	138508	114601
nage	b0679	[g]	68.346	648		703.362	544.488	421.397	288.321	722.554	634.801	513.138	345.201	270.127	843.439	651.291	658.582	613.145	389.536	444.895	369.807		717.948	667.803	618.677	469.207	372.014	289.056	455778	352828	273066	186832	468215	411351	332513	223690	175042	546549	422036	426761	397318	252419	288292	239635		465230	432736	400902	304046
glns	b0680	[j]	63.477	554		939.259	1009.57	1121.46	1144.82	929.507	961.183	1062.07	1135.79	1127.69	791.275	921.979	1000.61	1104.36	1218.65	1242.96	1230.15	1245.73	826.479	970.069	1096.13	1140.78	1247.24	1236.41	520350	559299	621290	634233	514947	532495	588388	629228	624740	438366	510776	554340	611815	675133	688598	681505	690134	457869	537418	607256	631990
fur	b0683	[p]	16.795	148		4190.38	3820.2	3119.89	2584.31	4276.11	4251.65	3400.02	2846.36	2678.94	4229.71	4176.32	3852.43	3683.36	3391.01	2438.99	2571.46	2168.56	4540.85	3730.95	3213.79	2841.56	2643.81	2463.59	620176	565390	461744	382477	632865	629244	503203	421261	396484	625997	618095	570159	545137	501870	360970	380576	320947	672046	552181	475641	420550
flda	b0684	[c]	19.737	176		1822.96	1782.99	1666.75	1583.78	2065.44	1972.14	1919.02	1627.37	1637.12	2360.1	2617.42	2323.28	1996.91	2056.78	1746.25	1583.59	921.429	2402.79	1945.71	1957.21	1840	2050.96	1674.3	320840	313807	293348	278745	363518	347097	337747	286417	288134	415377	460666	408897	351457	361993	307339	278712	162172	422891	342446	344470	323839
ybff	b0686	[r]	28.437	254		154.645	151.032	150.324		166.14		155.878	126.416	124.169	151.127		148.873							128.47	120.177	113.6	111.221	95.324	39279.7	38362.1	38182.4		42199.6		39592.9	32109.6	31539	38386.3		37813.8							32631.3	30525.1	28854.4
seqa	b0687	[l]	20.315	181		566.151	580.501	500.517	491.762	587.438	643.101	538.815	552.843	558.263	596.038	567.237	566.903	522.068	500.192	583.027	539.169	492.288	574.808	513.326	486.666	500.325	525.879	534.233	102473	105071	90593.6	89008.9	106326	116401	97525.4	100065	101046	107883	102670	102609	94494.2	90534.8	105528	97589.6	89104.1	104040	92912.1	88086.5	90558.8
pgm	b0688	[g]	58.36	546		1801.68	1665.06	1468.49	1296.5	1754.78	1753.61	1576.09	1415.86	1327.62	1758.64	1719.05	1558.91	1463.15	1281.32	1225.55	1113.9	1147.17	1943.47	1514.58	1462.66	1266.2	1170.78	1207.23	983719	909124	801795	707890	958109	957473	860543	773061	724878	960217	938603	851165	798877	699602	669152	608188	626356	1.06114e+06	826961	798611	691345
ybgi	b0710	[s]	26.892	247		1156.21	1021.48	924.287	772.089	1157.32	1119.56	861.753	843.202	750.459	983.124	957.278	853.604	642.428	583.907	391.741	437.113	372.213	957.089	692.205	593.451	515.813	452.58	437.295	285583	252305	228299	190706	285857	276531	212853	208271	185363	242832	236448	210840	158680	144225	96760.1	107967	91936.5	236401	170975	146582	127406
ybgk	b0712	[e]	34.386	310				64.1219		88.8339					44.9662											58.8966					19877.8		27538.5					13939.5											18257.9
glta	b0720	[c]	48.014	427		26490.1	23409.5	19666.5	15148.6	28160.9	27027.7	20678.2	19024.1	14779	23151.2	25405	25871.4	25965.6	25433.6	21154.1	16989.9	8848.06	19668.5	23108.6	24812.4	21366.6	18021.2	12979	1.13113e+07	9.99587e+06	8.39761e+06	6.46843e+06	1.20247e+07	1.15408e+07	8.82958e+06	8.12329e+06	6.31064e+06	9.88557e+06	1.08479e+07	1.10471e+07	1.10873e+07	1.08601e+07	9.0328e+06	7.25467e+06	3.77812e+06	8.39844e+06	9.86737e+06	1.05949e+07	9.12352e+06
sdhd	b0722	[c]	12.867	115		796.533	1310.53	1597.7	843.997	1275.62		2011.99	1964.47	1303.03	1697.8	2220.51	2245.12	2381.62			2131.53	1224.8	1770.86	2550.01	2587.21	1200.91	2328.8	1959.85	91601.3	150711	183736	97059.6	146697		231379	225914	149848	195247	255359	258188	273887			245126	140852	203648	293251	297530	138105
sdha	b0723	[c]	64.421	588		7437.78	7635.98	7365.45	6654.52	7337.16	8072.57	7245.19	7215.63	6415.49	7675.08	9147.16	10149.5	11001.1	10883.5	10653.7	9434.84	6922.98	7093.33	10072.1	11366	10864.8	9592.55	8952.93	4.37341e+06	4.48996e+06	4.33088e+06	3.91286e+06	4.31425e+06	4.74667e+06	4.26017e+06	4.24279e+06	3.77231e+06	4.51294e+06	5.37853e+06	5.96791e+06	6.46867e+06	6.39947e+06	6.26436e+06	5.54768e+06	4.07071e+06	4.17088e+06	5.92242e+06	6.68322e+06	6.3885e+06
sdhb	b0724	[c]	26.77	238		6197.3	6727.3	6283.17	5286.69	6535.65	7224.38	6169.1	6011.7	5438.08	7017.29	7510.55	8910.72	8746.86	8393.41	8231.06	7206.93	5520.06	6369.7	8164.24	9041.9	8716.29	7235.42	6658.82	1.47496e+06	1.6011e+06	1.49539e+06	1.25823e+06	1.55549e+06	1.7194e+06	1.46825e+06	1.43078e+06	1.29426e+06	1.67011e+06	1.78751e+06	2.12075e+06	2.08175e+06	1.99763e+06	1.95899e+06	1.71525e+06	1.31378e+06	1.51599e+06	1.94309e+06	2.15197e+06	2.07448e+06
suca	b0726	[c]	105.06	933		3622.64	3699.93	3565.21	3649.97	3695.27	3922.8	3565.89	3803.26	3458.21	3842.07	4240.55	4978.3	5535.23	6021.46	5812.19	5577.34	4796.91	3604.65	5301.83	6191.94	6149.5	5653.94	5277.18	3.37992e+06	3.45203e+06	3.32634e+06	3.40542e+06	3.44769e+06	3.65997e+06	3.32698e+06	3.54844e+06	3.22651e+06	3.58465e+06	3.95643e+06	4.64476e+06	5.16437e+06	5.61803e+06	5.42277e+06	5.20366e+06	4.47552e+06	3.36314e+06	4.94661e+06	5.77708e+06	5.73748e+06
sucb	b0727	[c]	44.011	405		7876.47	8443.89	8238.55	8620.48	8378.31	8630.62	8055.85	8822.95	8402.07	8355.87	9232.71	10653.5	11967.7	13250.4	12906.3	12724.1	11030.2	8249.28	11274.3	12923.1	13684.7	12533.5	12154.5	3.18997e+06	3.41978e+06	3.33661e+06	3.4913e+06	3.39321e+06	3.4954e+06	3.26262e+06	3.57329e+06	3.40284e+06	3.38413e+06	3.73925e+06	4.31468e+06	4.84693e+06	5.36643e+06	5.22706e+06	5.15326e+06	4.46721e+06	3.34096e+06	4.56608e+06	5.23387e+06	5.54229e+06
succ	b0728	[c]	41.392	388		24785.1	25659.5	23005.9	19107.9	26701.2	26791.8	23341.1	21659.2	19286.4	28651.7	32296	36081.2	38288.7	39930.9	36495.8	30747.3	20910	27669.3	37171.2	39379.3	37858.4	32635.8	27318.1	9.61661e+06	9.9559e+06	8.9263e+06	7.41386e+06	1.03601e+07	1.03952e+07	9.05636e+06	8.40377e+06	7.48313e+06	1.11168e+07	1.25309e+07	1.39995e+07	1.4856e+07	1.54932e+07	1.41604e+07	1.19299e+07	8.11309e+06	1.07357e+07	1.44224e+07	1.52792e+07	1.46891e+07
sucd	b0729	[c]	29.777	289		18226.5	18135.5	16339.6	13752.2	19215.7	19408.5	16783.3	15240.3	13464.9	20853	23816.7	26138.3	27025.6	28092.6	25792.7	21424.8	15037.7	19702.1	25525.7	29025.9	27586.2	22906.9	19668.9	5.26745e+06	5.24116e+06	4.72216e+06	3.9744e+06	5.55334e+06	5.60906e+06	4.85038e+06	4.40446e+06	3.89134e+06	6.02651e+06	6.88302e+06	7.55398e+06	7.81038e+06	8.11875e+06	7.4541e+06	6.19176e+06	4.3459e+06	5.6939e+06	7.37693e+06	8.38849e+06	7.97242e+06
cyda	b0733	[c]	58.204	522		1121.3	923.671	845.488	703.432	1124.95	1056.51	949.298	862.922	770.12	1267.17	1216.75	997.53	951.235	827.271	696.08	779.665	781.388	1127.03	908.709	899.391	737.744	712.142	696.065	585321	482156	441345	367191	587224	551499	495533	450445	402002	661464	635144	520711	496545	431835	363354	406985	407885	588312	474346	469482	385102
cydb	b0734	[c]	42.453	379		355.845	329.595	282.859	233.316	442.903			246.608	279.024	461.089									53.2523	98.1946	234.015	223.75	244.189	134865	124916	107204	88426.9	167860			93464.3	105750	174753									20182.6	37215.7	88691.8
tolq	b0737	[u]	25.597	230		155.77	173.666	182.828	193.92	174.461	160.177	168.351	179.509	201.197	153.509	163.531	188.814	179.385		184.463	218.962	223.054	234.842	181.661	176.269	216.71	193.627	225.431	35827.1	39943.3	42050.5	44601.6	40126	36840.8	38720.7	41287	46275.3	35307.1	37612.2	43427.3	41258.5		42426.5	50361.2	51302.5	54013.8	41782	40541.8	49843.3
tolr	b0738	[u]	15.383	142
tola	b0739	[m]	43.156	421			115.894		231.245	88.9343			111.339	118.951					124.551		128.643									48791.4		97354.1	37441.3			46873.8	50078.2					52435.9		54158.7
tolb	b0740	[u]	45.955	430		1226.07	1180.87	1224.34	1233.68	1127.64	1186.04	1184	1245.42	1243.64	1202.75	1157.66	1085.9	1134.81	1065.22	1130.4	1133.13	957.994	1364.35	1180.07	1110.4	1086.68	1627.29	1123.73	527209	507774	526465	530482	484883	509997	509121	535529	534764	517184	497795	466936	487967	458045	486074	487248	411937	586670	507431	477473	467271
pal	b0741	[m]	18.824	173		14214.9	17655.1	19890.4	20510.3	13919.1	14694.9	19060.9	21162.5	20966.7	10463.7	11581.2	13989.8	16357.5	17702.6	20276.2	21471.7	20226.2	11605.7	16197.8	18621.8	20406.9	20656.7	21316.2	2.45917e+06	3.05433e+06	3.44105e+06	3.54828e+06	2.408e+06	2.54221e+06	3.29754e+06	3.66112e+06	3.62724e+06	1.81022e+06	2.00355e+06	2.42024e+06	2.82984e+06	3.06255e+06	3.50779e+06	3.7146e+06	3.49913e+06	2.00778e+06	2.80222e+06	3.22156e+06	3.5304e+06
ybgf	b0742	[s]	28.231	263		642.153	751.436	833.058	989.16	611.199	646.504	778.753	882.081	962.964	691.789	722.029	582.925	745.473	804.823	907.431	891.564	647.611	777.494	734.365	790.037	897.057	1361.64	1006.55	168886	197628	219094	260149	160745	170031	204812	231987	253259	181941	189894	153309	196059	211669	238654	234481	170322	204481	193138	207780	235926
nada	b0750	[h]	38.24	347		124.882	148.46	131.434	166.462	124.185	159.466	131.043	154.301	115.306	140.124	196.747	215.889				273.446	254.555		254.718	388.185	323.168	362.052	348.63	43333.9	51515.7	45607.6	57762.5	43092.4	55334.6	45472	53542.3	40011.2	48623.1	68271.2	74913.6				94885.9	88330.7		88387.2	134700	112139
ybgs	b0753		12.872	126
arog	b0754	[e]	38.009	350		2540.38	3466.9	4451.52	5830.68	2554.73	2907.55	3763.42	4978.14	6017.25	1552.36	1797.35	2093.13	2478.8	3092	3572.57	3592.57	3857.82	1674.38	2253.93	2883.7	3221.3	3581.98	3649.97	889133	1.21341e+06	1.55803e+06	2.04074e+06	894154	1.01764e+06	1.3172e+06	1.74235e+06	2.10604e+06	543325	629074	732597	867581	1.0822e+06	1.2504e+06	1.2574e+06	1.35024e+06	586033	788876	1.00929e+06	1.12746e+06
gpma	b0755	[g]	28.556	250		8581.32	7261.13	6221.07	5531.38	8853.15	8299.36	6734.06	5841.87	5295.39	9062.77	8574.32	7386.9	6363.7	5302.78	4843.32	4588.81	4174.57	9247.11	6429.9	5567.19	4797.68	4559.54	4283.36	2.14533e+06	1.81528e+06	1.55527e+06	1.38285e+06	2.21329e+06	2.07484e+06	1.68352e+06	1.46047e+06	1.32385e+06	2.26569e+06	2.14358e+06	1.84673e+06	1.59092e+06	1.3257e+06	1.21083e+06	1.1472e+06	1.04364e+06	2.31178e+06	1.60748e+06	1.3918e+06	1.19942e+06
galm	b0756	[g]	38.19	346		782.308	736.253	724.674	606.764	775.391	883.329	750.555	713.384	721.274	658.997	622.926	730.852	684.609	643.863	714.33	563.179	582.872	742.857	669.214	690.621	614.371	606.266	566.438	270678	254744	250737	209940	268285	305632	259692	246831	249561	228013	215532	252875	236875	222777	247158	194860	201674	257028	231548	238955	212572
galk	b0757	[g]	41.442	382		438.986	381.741	307.954	218.895	444.744	444.498	362.942	343.62	287.284	454.618	483.574	482.736	609.69	485.848	545.231	389.281	219.855	545.943	427.432	441.21	395.356	412.986	293.744	167693	145825	117638	83617.9	169892	169798	138644	131263	109743	173664	184725	184405	232902	185594	208278	148706	83984.6	208550	163279	168542	151026
galt	b0758	[c]	39.645	348		62.7349	55.5615	50.9711	39.1732	64.4238	60.2795	72.1317	46.6973	53.693	48.8682	52.2978	52.4691		77.0544	75.2915	60.2153	411.148		56.4589	53.1812	66.3236	52.2103	51.0402	21831.7	19335.4	17737.9	13632.3	22419.5	20977.3	25101.8	16250.6	18685.2	17006.1	18199.6	18259.2		26814.9	26201.5	20954.9	143080		19647.7	18507	23080.6
gale	b0759		37.265	338		569.546	575.552	491.07	432.248	612.245	599.521	493.971	445.072	472.571	660.38	651.432	807.526	650.244	735.646	721.576	474.232	549.292	662.332	593.446	585.363	545.715	566.203	529.111	192507	194537	165982	146100	206939	202638	166962	150434	159729	223208	220184	272944	219782	248649	243893	160290	185661	223868	200585	197853	184452
modf	b0760	[p]	54.535	490		71.8131	69.8822	60.7113	54.1984	83.5762		67.892	54.8912	59.6456	40.3375						19.7842			37.064	31.1358	36.724	40.2806	28.4585	35188.4	34242.3	29748.5	26557.2	40952.4		33267.1	26896.7	29226.3	19765.4						9694.27			18161.4	15256.5	17994.7
mode	b0761	[r]	28.281	262
moda	b0763	[p]	27.364	257		264.601		115.571	117.85	199.053	142.583	209.968	146.566	112.256	351.788		202.927								227.539	225.5		107.529	68002.4		29701.7	30287.6	51156.7	36643.9	53961.7	37667.4	28849.7	90409.6		52152.3								58477.5	57953.5
modc	b0765	[p]	39.102	352		32.9371	37.1808	38.125				56.1047	56.778	16.7205	60.7035				54.7971					39.5648	70.7786	51.3119	24.6758	19.6771	11593.9	13087.7	13420				19748.8	19985.9	5885.61	21367.6				19288.6					13926.8	24914.1	18061.8
ybha	b0766	[r]	30.201	272		86.0254	123.241	115.565	129.276	92.535	95.4336	119.214	115.375	116.935	103.677	128.839	155.204	197.482	157.995		147.732			159.099	164.736	131.103	176.455	163.492	23398.9	33521.7	31433.6	35163.1	25169.5	25957.9	32426.2	31382	31806.4	28200.2	35044.3	42215.4	53715.2	42974.7		40183.2			43274.9	44808.2	35660
pgl	b0767		36.307	331		1192.64	904.145	796.598	624.694	1132.27	968.561	855.729	751.351	651.947	1270.16	1064.21	838.802	670.642	520.223	451.355	357.525	268.986	1424.06	772.174	576.979	455.573	405.448	378.841	394763	299272	263674	206774	374783	320594	283246	248697	215795	420422	352254	277644	221982	172194	149398	118341	89034.2	471363	255589	190980	150795
ybhc	b0772	[g]	46.082	427		378.032	365.001	404.149	419.289	376.941	388.158	379.08	426.347	426.199	385.729	435.264	402.969	385.823	396.445	371.386	366.449	452.521	462.077	432.306	460.157	429.799	396.61	442.419	161420	155855	172572	179036	160954	165743	161867	182050	181987	164706	185858	172068	164746	169282	158582	156474	193227	197307	184595	196487	183524
ybhb	b0773		17.085	158
bioa	b0774	[h]	47.335	429			32.773	39.5516	48.7253				38.6954											51.6785		37.4527	41.008			14059.6	16967.6	20903.1				16600.3											22170.1		16067.2
biob	b0775	[h]	38.648	346			64.3711	76.6546	112.47	44.651		57.209	90.9974									147.696		52.409		96.4762	187.578	135.05		22272.4	26522.5	38914.6	15449.3		19794.3	31485.1									51102.9		18133.5		33380.8
biod	b0778	[h]	24.139	225		114.206	115.323	122.67	134.632	131.27	103.937	152.531	120.609	137.968	93.9522			110.204		111.858				113.381	125.215	127.716	129.351	125.057	25696.4	25947.7	27600.8	30292.2	29535.7	23385.8	34319.6	27137	31042.8	21139.2			24795.9		25168				25510.7	28173.3	28736.1
uvrb	b0779	[l]	76.225	673		142.807	127.498	97.644	87.3956	136.419		87.6473		96.6871	136.892	103.513					70.0645			91.264		60.6719	66.4921	55.6468	96109.2	85806.4	65714.4	58817.2	91810.1		58986.6		65070.4	92128.6	69664.3					47153.4			61420.7		40832.2
moab	b0782	[h]	18.665	170		2156.07	1838.64	1582.68	1261.69	2076.77	1892.51	1657.52	1426.65	1278.68	2049.28	1843.27	1494.94	1248.33	895.762	754.781	720.714	659.614	1773.87	1267.6	1037.79	868.231	724.47	685.454	366532	312568	269055	214487	353051	321726	281779	242531	217375	348378	313356	254140	212216	152280	128313	122521	112134	301558	215492	176425	147599
moac	b0783	[h]	17.467	161		204.299	227.042	187.188	196.803	237.764	221.908	203.936	176.655	333.574	203.269	192.36	270.025		172.543	143.711	199.494			195.241	176.955	186.839	137.579	156.992	32892.1	36553.7	30137.3	31685.3	38280	35727.2	32833.7	28441.4	53705.3	32726.4	30969.9	43474.1		27779.4	23137.5	32118.5			31433.8	28489.7	30081.1
moad	b0784	[h]	8.7578	81													10.3963										9.5871													842.104
moae	b0785	[h]	16.981	150						191.608	217.739		200.8	249.029	224.574								261.492										28741.2	32660.8		30120.1	37354.4	33686								39223.9
ybhm	b0787	[r]	26.123	237
ybhg	b0795	[m]	36.415	332		20.424	17.2264	17.6242	17.5501	24.5476					20.9255									16.6136				18.2843	6780.76	5719.17	5851.22	5826.65	8149.81					6947.27									5515.72
rhle	b0797	[lkj]	49.989	454					9.31961																							4231.1
ybib	b0800	[e]	35.048	320		441.82	382.472	398.589	342.798	394.068	389.42	400.245	334.115	327.232	318.71	282.377	277.397	213.36	211.969	185.959	192.442		337.473	224.987	227.872	195.717	173.248	187.937	141382	122391	127548	109696	126102	124614	128079	106917	104714	101987	90360.7	88766.9	68275.3	67830	59506.9	61581.6		107991	71995.7	72919.1	62629.4
ybic	b0801	[c]	38.897	361		722.75	810.036	858.633	934.45	766.162	780.201	858.43	900.838	993.428	403.576	432.801	517.866	529.705	637.869	574.915		535.907	436.555	488.53	533.003	526.383	546.277	439.435	260913	292423	309966	337337	276584	281653	309893	325202	358628	145691	156241	186950	191224	230271	207544		193462	157596	176359	192414	190024
fiu	b0805	[p]	81.959	760		72.2823	68.6726	78.8959	36.1272	27.7323	72.1793	34.4501	81.0747	40.8234	23.4884	75.1016	90.6523	21.3453		26.743	110.313		88.0959	95.5784	43.6159	24.226	22.6266	95.7481	54934.5	52191.2	59960.9	27456.7	21076.5	54856.3	26182.1	61616.7	31025.8	17851.2	57077.2	68895.8	16222.5		20324.7	83838.3		66952.9	72639.6	33148.1	18411.7
rlmf	b0807		34.226	308					19.8398												22.196											6110.67												6836.37
glnq	b0809	[e]	26.731	240		777.929	704.417	554.845	394.012	784.356	856.339	567.495	460.496	371.369	854.779	970.429	780.928	943.235	468.451	430.581	422.633	313.743	924.115	758.587	625.85	515.537	373.181	393.536	186703	169060	133163	94562.8	188245	205521	136199	110519	89128.6	205147	232903	187423	226377	112428	103339	101432	75298.3	221788	182061	150204	123729
glnh	b0811	[et]	27.19	248		13754.2	11417	5830.78	3643.76	11979.4	12420.1	8951.81	4350.21	3302.01	16426.9	13634.7	9278.27	11037	5833.56	4865.19	3648.97	688.742	18306.8	12925	8545.32	6055.19	6222.87	3557.1	3.41105e+06	2.83142e+06	1.44603e+06	903653	2.97089e+06	3.08019e+06	2.22005e+06	1.07885e+06	818898	4.07387e+06	3.3814e+06	2.30101e+06	2.73718e+06	1.44672e+06	1.20657e+06	904945	170808	4.54007e+06	3.20541e+06	2.11924e+06	1.50169e+06
dps	b0812	[p]	18.695	167		16773.9	14617.1	15122.3	12233.5	16873.7	14884.9	13965	13398.1	12739.9	25940	21891.5	15797.1	9905.88	6237.62	4320.83	3442.52	2443.85	30015	11515.1	7552.04	4763.48	3296.09	3548.66	2.80124e+06	2.44106e+06	2.52543e+06	2.04299e+06	2.8179e+06	2.48578e+06	2.33216e+06	2.23748e+06	2.12756e+06	4.33198e+06	3.65589e+06	2.63811e+06	1.65428e+06	1.04168e+06	721578	574901	408124	5.01251e+06	1.92302e+06	1.26119e+06	795500
ompx	b0814	[m]	18.602	171		3201.52	3171.21	4062.92	6190.69	2636.27	2588.73	3621.74	4839.97	6847.49	2196.94	2435.61	2577.99	2322.7	2838.02	3393.38	3850.03	6921.12	2406.78	2627.08	2511.35	3196.9	3719.25	4769.77	547460	542276	694759	1.05861e+06	450802	442673	619318	827634	1.17092e+06	375676	416489	440837	397182	485302	580268	658356	1.18351e+06	411559	449231	429441	546669
ybis	b0819	[s]	33.325	306		1040.05	1157.02	1115.31	1183.42	974.049	1053.28	1044.79	1151.61	1249.99	1049.93	949.956	1000.04	1084.77	1011.65	1094.04	1041.66	576.323	1023.03	1046.56	1043.87	986.821	1887.75	1176.98	318254	354048	341286	362125	298059	322303	319705	352391	382497	321278	290687	306011	331941	309566	334777	318749	176355	313046	320247	319423	301967
ybit	b0820	[r]	59.857	530		184.387	196.985	199.756	188.045	169.575	188.95	209.647	199.534	192.988	168.636	169.546	211.175	190.388	205.125	221.704	190.982	257.663	195.837	196.45	225.038	228.163	208.567	236.477	97725.1	104402	105871	99663.8	89874.9	100144	111113	105753	102283	89377	89859.6	111923	100905	108716	117503	101220	136561	103793	104118	119270	120926
ybiu	b0821		47.329	421		23.2146	22.4046		22.0837															18.9996				17.1771	9773.34	9432.34		9297.23															7998.85
ybiv	b0822	[r]	30.412	271		47.6868	52.2376	59.9143	65.0123	49.6966			69.8073											31.1499	57.9697		37.6977	44.5685	12923.1	14156.4	16236.8	17618.3	13467.8			18917.8											8441.63	15709.8
moea	b0827	[h]	44.067	411		204.653	203.894	194.522	192.996	210.518	210.134	200.998	195.573	186.206	195.695	191.502	189.201	177.652	181.209	166.686	149.589	169.037	207.687	181.958	169.155	163.243	153.422	153.835	84112.3	83800.3	79948.5	79321.3	86523.1	86365	82610.4	80380.6	76530.7	80430.6	78707.3	77761.7	73014.8	74477	68508.1	61480.9	69474.1	85359.5	74784.7	69522.5	67092.9
gsib	b0830		56.47	512		208.256	193.079	167.411	138.099	215.437	191.126	181.82	139.088	138.632	153.071	144.202	136.501	117.779	112.564	351.685	70.9369		170.832	130.261	110.933	96.3816	116.102	72.008	106627	98856.6	85714.7	70706.9	110304	97856.5	93091.9	71213.2	70979.4	78372.4	73831.2	69888.4	60303.1	57632.6	180063	36319.7		87466	66693.4	56797.8	49347.4
rimo	b0835		49.581	441		101.56	118.894	135.512	168.858		122.259	129.909	163.796	169.678	89.7537	105.997	164.513	147.922	186.452	196.256	216.34	226.8	403.056	131.32		172.121	193.046	210.534	44788.2	52432.4	59760.7	74466.2		53916.4	57289.9	72234.2	74828.1	39581.4	46744.5	72550.3	65233.5	82225.4	86549.1	95406.1	100019	177748	57912.2		75905.4
gstb	b0838		23.713	208		1274.35	1126.06	919.417	790.83	1292.44	1146.27	1076.92	826.48	782.354	1112.62	1049.49	803.269	709.15	493.151	425.163		280.395	1250	768.985	602.936	475.81	363.645	383.568	265066	234220	191239	164493	268827	238425	224000	171908	162730	231425	218294	167080	147503	102575	88433.9		58322.2	260001	159949	125411	98968.4
dacc	b0839	[m]	43.608	400		1162.18	986.401	849.475	628.701	1178.54	1017.16	885.959	776.747	683.713	1083.83	1059.45	931.655	787.676	641.148	481.863	427.564	354.171	1193.86	880.352	662.747	508.759	404.084	394.79	464872	394561	339790	251480	471416	406862	354383	310699	273485	433533	423781	372662	315071	256459	192745	171026	141668	477542	352141	265099	203504
deor	b0840		28.548	252			9.89212														9.50061						9.6873			2492.81														2394.15
nfsa	b0851	[c]	26.8	240		262.754	269.19	238.967	204.839	290.187	310.197	273.28	232.036	216.015	331.032	332.542	376.76	338.684	350.082	262.313	255.977	267.661		331.687	281.461	278.079	265.534	233.951	63060.9	64605.6	57352.2	49161.3	69645	74447.2	65587.1	55688.8	51843.6	79447.8	79810	90422.4	81284.2	84019.6	62955.1	61434.6	64238.6		79604.9	67550.7	66739
potf	b0854	[e]	40.839	370		1492.52	1187.33	813.749	625.684	1337.3	1214.91	938.492	705.64	605.539	2012.19	1614.8	1254.8	1260.94	951.946	856.068	692.782	212.845	1980.86	1265.17	965.018	859.668	1305.77	635.068	552232	439313	301087	231503	494803	449518	347242	261087	224050	744511	597477	464274	466549	352220	316745	256329	78752.6	732918	468113	357057	318077
potg	b0855		41.93	377		65.4394	63.4795	51.522		60.8696			50.8279						86.884					75.3102		61.3798	55.7504	55.462	24670.7	23931.8	19423.8		22947.8			19162.1						32755.3					28391.9		23140.2
artj	b0860	[et]	26.829	243		1584.85	2021.96	1835.4	2250.04	1296.78	1727.57	1835.05	1842.56	2050.8	1067.24	939.907	831.53	1228.13	1367.73	1750.55	1593.29	495.483	795.955	1114.59	1203.74	1650.07	3006.66	1698.41	385119	491335	446003	546760	315119	419799	445917	447743	498345	259339	228398	202062	298435	332358	425384	387169	120402	193417	270846	292510	400967
arti	b0863	[et]	26.929	243		1578.1	1365.23	1055.71	1058.22	1267.02	1455.67	1255.12	977.424	927.169	2060.56	1597.91	1402.07	2069.35	1781.1	1834.34	1795.82	383.993	1724.43	1835.85	1838.55	1806.92	3294.85	1724.22	383478	331751	256539	257147	307886	353729	304995	237514	225302	500716	388291	340702	502851	432808	445745	436384	93310.3	419037	446110	446767	439081
artp	b0864	[e]	27.022	242		184.238	167.806	162.351	182.908		154.61			160.688	209.045					233.32		359.794	251.487	214.968		236.153	255.386	310.574	44585.5	40608.9	39289	44263.8		37415.6			38886.4	50589					56463.3		87070.1	60860	52022.2		57149.1
ybjp	b0865		18.991	171		3127.16	2349.37	2230.5	1462.33	2895.07	2628.24	2253.7	1623.87	1421.99	3308.21	2637.57	2288.41	1665.9	1313.29	981.849	739.851	662.451	3317.01	1886.19	1381.39	1062.21	703.885	729.969	534744	401741	381415	250058	495056	449429	385383	277682	243160	565704	451025	391318	284869	224572	167896	126515	113279	567209	322538	236217	181639
ybjq	b0866	[s]	11.437	107			507.399	304.119		474.215	375.869		307.298	254.041	502.43									400.965	183.061					54291.7	32540.7		50741	40218		32880.9	27182.4	53760									42903.3	19587.5
ltae	b0870	[e]	36.494	333		135.49	199.16	191.112	176.374	181.606	204.24	149.217	168.779	181.68	200.479				116.963			144.573		218.827	182.975	171.508	167.838	161.685	45118.1	66320.2	63640.4	58732.4	60474.8	68012.1	49689.3	56203.5	60499.6	66759.6				38948.6			48142.8		72869.5	60930.8	57112
poxb	b0871	[eh]	62.011	572		568.621	381.433	325.995	249.32	515.968	421.856	318.182	274.818	227.477	687.533	598.154	327.377	281.466	164.433	112.358	86.7733	70.6218	532.695	305.942	199.291	131.044	87.8022	68.455	325251	218180	186469	142611	295134	241302	182000	157196	130117	393269	342144	187260	160998	94055.6	64269	49634.3	40395.7	304702	174999	113995	74957.4
maca	b0878		40.623	371				51.4274	48.4721	62.7438					48.2697									47.7627							19079.6	17983.2	23277.9					17908.1									17720
cspd	b0880	[k]	7.9689	74		1759.05	1386.32	1110.95		1702.55	1698.23	1067.33			2536.13	1176.37	1884.43	1126.8					1554.35	2166.88		1163.32			130169	102588	82210.5		125988	125669	78982.4			187674	87051.6	139448	83383					115022	160349		86085.7
clps	b0881		12.179	106
clpa	b0882	[o]	84.206	758		254.229	248.218	263.491	299.405	265.435	226.476	227.592	269.531	253.853	209.486	167.679	184.219	158.841	200.174	148.889	170.967	137.329	190.26	200.507	204.695	171.777	181.521	153.513	192706	188149	199726	226949	201199	171669	172515	204305	192421	158790	127101	139638	120401	151732	112858	129593	104095	144217	151984	155159	130207
infa	b0884	[j]	8.2495	72		2522.85	4254.33	3132.47	3238.31	2511.72	2489.47	2858.36	2870.2	2834.51	2551.59	2852.41	3092.23	3310.41	3276.7	3579.18	3663.5	2596.46	2601.96	3234.36	3149.77	3392.51	3661.44	3854.79	181645	306312	225538	233158	180844	179242	205802	206655	204085	183714	205373	222641	238349	235923	257701	263772	186945	187341	232874	226783	244261
cydc	b0886	[co]	62.919	573		68.7318	52.866	40.9866	37.2194															32.9497		33.5243	34.0559	36.6394	39383.3	30292.2	23485.3	21326.7															18880.2		19209.4
cydd	b0887	[co]	65.055	588		27.977		29.3532	29.2988	31.213		29.7409		25.5603	25.249													27.7758	16450.5		17259.7	17227.7	18353.2		17487.6		15029.4	14846.4
trxb	b0888	[o]	34.623	321		1479.87	1578.79	1618.26	1792.72	1438.27	1426.71	1651.97	1741.43	1766.55	1413.9	1449.17	1597.92	1752.59	1657.24	1788.51	1762.58	1877.11	1627.05	1634.31	1725.23	1751.35	1744.98	1778.07	475039	506792	519460	575462	461686	457973	530284	559000	567063	453863	465184	512932	562583	531973	574110	565787	602553	522283	524614	553798	562184
lrp	b0889	[k]	18.887	164		9238.28	8853.3	8086.36	7797.29	9222	8981.49	8358.02	7838.39	7634.67	7153.22	7207.56	7401.2	6503.2	5529.4	5371.88	4923.69	4300.31	7893.76	6343.3	6039.69	5220.51	4475.24	4194.21	1.51508e+06	1.45194e+06	1.32616e+06	1.27875e+06	1.51241e+06	1.47296e+06	1.37072e+06	1.2855e+06	1.25209e+06	1.17313e+06	1.18204e+06	1.2138e+06	1.06653e+06	906821	880988	807485	705251	1.29458e+06	1.0403e+06	990509	856163
lola	b0891	[m]	22.497	203																								93.901
sers	b0893	[j]	48.413	430		1823.03	1924.31	1922.57	2025.3	1858.7	1891.89	1958.6	2090.8	2146.53	1630.58	1656.8	1794.98	1810.25	1984.19	1972.87	2101.23	2483.16	1663.1	1712.71	1856.16	1987.08	2086.89	2303.89	783903	827453	826703	870881	799241	813511	842198	899044	923007	701151	712423	771843	778406	853201	848334	903530	1.06776e+06	715132	736467	798148	854443
ycac	b0897	[q]	23.1	208		1336.58	763.067	436.477		1408.22	1024.83	561.013	345.547	308.57	2896.59	2271.39	1333.86	894.011	469.569	312.657	187.799	192.711	2584.63	1072.62	657.176	382.375			278008	158718	90787.3		292909	213165	116691	71873.7	64182.5	602491	472449	277443	185954	97670.3	65032.7	39062.3	40083.9	537603	223106	136693	79534
pfla	b0902	[o]	28.204	246		221.955	195.157	176.171	149.444	227.854	210.732	177.412	177.921	158.863	215.052	240.671	228.574	228.639		181.151	154.048	164.349	256.393	198.574	193.248	172.829	154.703	170.092	54600.8	48008.6	43338.1	36763.2	56052.1	51840	43643.3	43768.5	39080.3	52902.8	59205	56229.3	56245.2		44563.2	37895.8	40429.8	63072.6	48849.1	47539.1	42515.9
pflb	b0903	[c]	85.356	760		12500.6	9957.01	8056.54	6498.46	12458.6	11179.7	8875.46	7032.24	6493.77	12768.8	12034	10453.5	9109.64	7829.46	6092.57	5448.18	5445.82	12622.8	9319.44	7933.63	6529.32	5737.28	5383.28	9.50048e+06	7.56732e+06	6.12297e+06	4.93883e+06	9.46854e+06	8.49655e+06	6.74535e+06	5.3445e+06	4.93526e+06	9.70426e+06	9.14585e+06	7.94467e+06	6.92332e+06	5.95039e+06	4.63035e+06	4.14062e+06	4.13882e+06	9.59333e+06	7.08277e+06	6.02956e+06	4.96228e+06
ycao	b0905		65.651	586		49.7125	59.7014	86.3218	112.76	45.7169	51.5281	66.5967	92.1297	99.3869	39.812	43.7633	60.2769		103.997		143.167			80.9804	106.705	124.502	124.148	142.707	29131.5	34985	50584.6	66077.6	26790.1	30195.5	39025.7	53988	58240.7	23329.8	25645.3	35322.3		60942.4		83895.7			47454.5	62528.9	72958.2
serc	b0907	[he]	39.783	362		6298.5	6977.23	7327.49	8379.88	6356.38	6789.61	7117.85	7714.2	8515.35	4508.06	4822.54	4918	4817.79	4752.34	4774.38	4633.46	4906.64	4954.68	4765.24	4811.61	4650.82	4442.7	4678.47	2.28006e+06	2.52576e+06	2.65255e+06	3.03352e+06	2.30101e+06	2.45784e+06	2.57666e+06	2.79254e+06	3.08256e+06	1.63192e+06	1.74576e+06	1.78032e+06	1.74404e+06	1.72035e+06	1.72833e+06	1.67731e+06	1.7762e+06	1.79359e+06	1.72502e+06	1.7418e+06	1.6836e+06
aroa	b0908	[e]	46.095	427		340.671	371.377	418.834	519.54	361.958	340.499	381.138	469.232	564.505	260.457	270.667	286.92	309.549	303.239	291.287	342.545	303.102	305.055	272.772	294.066	314.394	307.796	369.505	145466	158578	178842	221843	154556	145393	162746	200362	241044	111215	115575	122515	132177	129483	124379	146267	129425	130258	116473	125566	134246
cmk	b0910	[f]	24.746	227		202.906	205.026	198.379	210.682	215.993	197.742	178.159	192.403		263.062	267.011	237.241	244.618	232.456	265.438	196.739		284.371	243.216	230.985	218.479	250.329	245.094	46059.6	46540.9	45032	47824.7	49030.4	44887.5	40442.2	43675.4		59715	60611.6	53853.7	55528.3	52767.6	60254.4	44659.7		64552.2	55210	52433.6	49594.8
rpsa	b0911	[j]	61.157	557		13121	15567.1	18361.9	21096.2	13103.7	13783.7	16810	20042.2	21049.9	12458	13714.3	16487.3	19840.4	22322.2	23953.4	25904.4	27414.5	13887.4	18908.3	22301.5	23916.3	25175.8	27108.8	7.30838e+06	8.67087e+06	1.02276e+07	1.17506e+07	7.29875e+06	7.67753e+06	9.36318e+06	1.11635e+07	1.17248e+07	6.93912e+06	7.63889e+06	9.18341e+06	1.10511e+07	1.24334e+07	1.3342e+07	1.44288e+07	1.52699e+07	7.73529e+06	1.05319e+07	1.24219e+07	1.33214e+07
ihfb	b0912	[l]	10.651	94		6931.46	5586.12	5363.98	3656.26	6453.02	5226.9	5352.26	5174.05	4456.58	5343.07	6996.23	4682.07	3579.94	3468.94	2772.6	3247.34	2509.09	6428.77	4122.12	4067.56	3811.97	2806.38	3059.32	651557	525095	504214	343688	606584	491329	503112	486361	418918	502249	657646	440114	336515	326080	260624	305250	235854	604304	387479	382350	358325
msba	b0914	[v]	64.46	582		55.5388	61.3608	56.2959	57.9877	58.2987	56.5603	56.8277	68.0078	70.8687	57.6728							60.6659	57.6686	60.7718	65.0627	54.1491	59.1217	57.4359	32323.6	35712	32764.2	33748.9	33929.9	32918.1	33073.7	39580.5	41245.6	33565.5							35307.6	33563.1	35369.2	37866.5	31514.8
ycar	b0917	[s]	6.8549	60		1282	1188.66	1049.96	981.218	1182.4	1244.53	1253.27		993.061	1122.93	1339.87		1362.74	1137.72	1120.11	1138.09	816.121	1366.71	1177.34	1181.39	1267.57		981.719	76919.8	71319.4	62997.8	58873.1	70943.9	74671.7	75196.2		59583.7	67375.7	80392.3		81764.4	68263.3	67206.9	68285.7	48967.3	82002.4	70640.6	70883.2	76054.3
kdsb	b0918	[m]	27.614	248		252.845	312.306	265.868	395.151	275.283	261.607	275.805	320.51	334.424	243.527	229.791	268.971	326.542		356.212	298.062	317.799	290.11	308.528	302.135	345.187	332.296	359.281	62705.5	77451.9	65935.2	97997.4	68270.2	64878.4	68399.6	79486.4	82937.1	60394.6	56988.2	66704.8	80982.5		88340.6	73919.3	78814	71947.4	76515	74929.6	85606.5
mukf	b0922	[d]	50.578	440													89.483																							39372.5
muke	b0923	[d]	26.974	234		173.537	143.805	149.066	129.611	174.538	174.348	161.568	144.509	129.011	173.139		173.481	157.394		129.238		127.495		145.429	142.371	129.835	149.299	122.818	40607.7	33650.5	34881.5	30328.9	40841.8	40797.4	37806.8	33815.1	30188.5	40514.5		40594.6	36830.2		30241.6		29833.9		34030.4	33314.8	30381.5
mukb	b0924	[d]	170.23	1486		85.1119	87.9049	81.1834	74.2479	90.2341	93.1108	84.7203	80.9742	76.177	88.9814	88.1442	80.51	90.5843	75.2049	73.8804	64.2337	67.4648	98.9423	83.2388	78.9367	72.6199	66.1443	66.8608	126476	130627	120639	110332	134088	138363	125894	120328	113199	132226	130982	119638	134608	111754	109786	95451.2	100253	147028	123693	117300	107913
ycbl	b0927	[r]	23.784	215		282.42	272.495	175.45	199.146	263.45	266.584	198.286	184.73	189.743	290.556	351.292	240.348	193.483	170.42	153.319	132.182	147.204		189.562	162.819	158.655	160.979	146.972	60720.2	58586.5	37721.8	42816.4	56641.7	57315.6	42631.5	39717	40794.7	62469.5	75527.7	51674.7	41598.8	36640.3	32963.6	28419.2	31648.8		40755.9	35006.1	34110.9
aspc	b0928	[e]	43.573	396		11810.7	12224.9	10399.9	9490.18	12115.7	12481.4	11539.6	9740.49	9375.25	9775.84	10832.2	11181.5	10921.1	9768.5	9046.14	7890.51	6618.07	9767.99	10346.3	10017.3	8807.66	8154.43	7148.18	4.67706e+06	4.84105e+06	4.11837e+06	3.75811e+06	4.7978e+06	4.94262e+06	4.5697e+06	3.85724e+06	3.7126e+06	3.87123e+06	4.28956e+06	4.42787e+06	4.32476e+06	3.86832e+06	3.58227e+06	3.12464e+06	2.62076e+06	3.86812e+06	4.09715e+06	3.96687e+06	3.48783e+06
ompf	b0929	[m]	39.333	362		76056.2	77290.7	64291.3	47662.3	77126.7	78067.1	70561.1	57015.4	46568	63721.6	69439.6	73701.1	71733.1	62412.4	56568.2	51713	34572.5	64312.3	68030.1	62866.8	54378.7	51021.7	39187.8	2.75323e+07	2.79793e+07	2.32735e+07	1.72538e+07	2.79199e+07	2.82603e+07	2.55431e+07	2.06396e+07	1.68576e+07	2.30672e+07	2.51371e+07	2.66798e+07	2.59674e+07	2.25933e+07	2.04777e+07	1.87201e+07	1.25153e+07	2.32811e+07	2.46269e+07	2.27578e+07	1.96851e+07
asns	b0930	[j]	52.57	466		2299.1	2455.79	2258.87	2497.86	2363.5	2486.78	2325.95	2488.18	2561.21	2046.02	2231.16	2289.47	2288.69	2356.45	2359.46	2377.71	2543.66	2285.85	2233.4	2412.4	2341.2	2385.49	2374.65	1.07138e+06	1.1444e+06	1.05263e+06	1.164e+06	1.10139e+06	1.15884e+06	1.08389e+06	1.15949e+06	1.19352e+06	953446	1.03972e+06	1.06689e+06	1.06653e+06	1.0981e+06	1.09951e+06	1.10801e+06	1.18535e+06	1.06521e+06	1.04076e+06	1.12418e+06	1.091e+06
pncb	b0931	[h]	45.897	400		330.484	363.81	332.237	352.458	362.283	365.929	358.149	383.179	340.813	332.801	361.07	360.967	348.629	334.058	289.321	318.44	311.469	354.014	343.698	347.513	320.545	280.994	315.019	132194	145524	132895	140983	144913	146372	143260	153272	136325	133120	144428	144387	139452	133623	115728	127376	124587	141606	137479	139005	128218
pepn	b0932	[e]	98.918	870		1037.76	912.604	791.471	621.375	1008.32	975.11	882.833	715.934	625.741	1004.98	971.127	889.583	829.613	664.997	534.952	481.328	440.712	991.172	810.018	699.776	550.042	490.829	444.082	902848	793965	688580	540597	877239	848345	768065	622862	544394	874337	844881	773937	721763	578547	465408	418755	383419	862320	704715	608805	478537
pyrd	b0945	[f]	36.774	336		228.717	377.985	552.787	775.017	236.862	303.426	435.526	666.006	819.666	186.038	305.688	386.372	604.769	706.115	885.122	1045.33	1096.7	204.723	429.794	583.279	750.356	949.57	1004.09	76848.8	127003	185736	260406	79585.7	101951	146337	223778	275408	62508.7	102711	129821	203203	237255	297401	351231	368492	68786.8	144411	195982	252120
ycbx	b0947	[r]	40.644	369		46.0886		29.0583	44.6909	39.2946		35.0654	30.4633		37.2769										29.6707	21.6781			17006.7		10722.5	16490.9	14499.7		12939.1	11241		13755.2										10948.5	7999.21
uup	b0949	[r]	72.066	635		18.6636	26.4622	31.5139	34.6943	20.336				34.2432	25.1055		17.4392	31.0523	31.7932					31.0216		34.5042	33.0076	31.4264	11851.4	16803.5	20011.3	22030.9	12913.4				21744.5	15942		11073.9	19718.2	20188.7					19698.7		21910.2
pqib	b0951	[r]	60.52	546					11.0792						13.1671																	6049.25						7189.22
rmf	b0953	[j]	6.5074	55		1396.01				1688.83					3358.55	2155.82	1153.46			296.814				812.777	1674.28	354.665	223.308		76780.4				92885.5					184720	118570	63440.4			16324.8				44702.7	92085.3	19506.6
faba	b0954	[i]	18.969	172		12274.6	13217.9	14240	12930.8	12418.8	13118.6	14882	13656.1	13583.2	11486.8	12643.7	13664.4	16219.5	17269.5	18535.5	17911.7	12150.8	10921.1	14832.2	17653.9	18963.8	19309.2	18716.4	2.11124e+06	2.27347e+06	2.44928e+06	2.22409e+06	2.13604e+06	2.2564e+06	2.5597e+06	2.34885e+06	2.3363e+06	1.97573e+06	2.17472e+06	2.35028e+06	2.78976e+06	2.97036e+06	3.1881e+06	3.08081e+06	2.08994e+06	1.87842e+06	2.55113e+06	3.03648e+06	3.26177e+06
ycbz	b0955	[o]	65.818	586						5.01101																							2936.45
matp	b0956		17.693	150		180.273	161.268	120.439		196.911		123.182	106.345						145.022					148.448	139.57	123.49	111.315	99.8714	27040.9	24190.2	18065.9		29536.6		18477.3	15951.8						21753.2					22267.2	20935.5	18523.5
ompa	b0957	[m]	37.2	346		90750.2	98590.6	106297	111652	88853.4	89737.9	100866	109086	109591	64740.8	63499.4	65384.1	68469.1	69132.3	75108.7	82151.5	85458.9	67860	68103.5	72551.8	76314.5	76139.6	83509.3	3.13996e+07	3.41123e+07	3.67789e+07	3.86317e+07	3.07433e+07	3.10493e+07	3.48996e+07	3.77438e+07	3.79186e+07	2.24003e+07	2.19708e+07	2.26229e+07	2.36903e+07	2.39198e+07	2.59876e+07	2.84244e+07	2.95688e+07	2.34796e+07	2.35638e+07	2.51029e+07	2.64048e+07
yccf	b0961	[s]	16.275	148						297.306	272.441	308.315		316.374		252.422	288.829				385.059	390.118											44001.2	40321.3	45630.7		46823.4		37358.5	42746.6				56988.8	57737.5
held	b0962	[l]	77.975	684				129.19	152.734	103.297				125.985			96.0342														88365.8	104470	70654.9				86173.7			65687.4
mgsa	b0963	[g]	16.918	152		569.66	523.861	427.683	329.756	573.905	345.819	442.651	422.943		565.231		485.908	546.441	341.344	365.703				549.861	461.662	385.323	333.485	234.36	86588.3	79626.9	65007.9	50123	87233.5	52564.4	67283	64287.3		85915.1		73858	83059	51884.3	55586.9				83578.8	70172.7	58569.1
yccu	b0965		14.701	137		967.684	1014.7	715.594	520.506	938.124	895.704	778.043	578.371	563.395	1028.29	881.092	772.8	695.377	516.244	453.531		276.224	885.281	690.063	518.43	581.687	507.504	404.503	132573	139013	98036.4	71309.4	128523	122711	106592	79236.8	77185.1	140876	120710	105874	95266.6	70725.4	62133.8		37842.7	121283	94538.6	71024.9	79691.2
rlmi	b0967		44.356	396		76.0594	81.9471	103.284	110.675	81.2965	95.1521	110.098	94.7197	125.206	89.2262									98.2444	96.9762	124.116	117.539	136.727	30119.5	32451.1	40900.4	43827.4	32193.4	37680.2	43599	37509	49581.8	35333.6									38904.8	38402.6	49149.8
tuse	b0969		12.41	109											76.0503																							8289.49
gfcd	b0984		78.686	698							74.8232			85.7264						80.0572			56.2926											52226.6			59837						55879.9			39292.2
cbpa	b1000	[o]	34.455	306						64.4475	57.5126	52.2075														34.5641							19720.9	17598.9	15975.5														10576.6
agp	b1002		45.682	413		1945.47	1717.55	891.34	455.082	1772.14	1527.01	1034.82	205.715	281.179	2645.48	1690.67	1894.03	1239.77	527.117	694.799	417.583		976.402	1789.04	1284.59	747.737	619.939	353.394	803481	709349	368123	187949	731893	630657	427381	84960.4	116127	1.09259e+06	698245	782234	512026	217699	286952	172462		403254	738873	530537	308815
yccj	b1003		8.5244	75		862.249	697.233	551.442	375.749	804.012	709.153	602.08	638.778	794.98	992.086	744.06	680.446	367.185	273.707		139.984	108.482	928.698	483.539	330.848	327.178		304.177	64668.7	52292.4	41358.2	28181.1	60300.9	53186.5	45156	47908.3	59623.5	74406.4	55804.5	51033.4	27538.9	20528		10498.8	8136.17	69652.4	36265.5	24813.6	24538.4
wrba	b1004	[r]	20.845	198		6786.86	5003.42	3951.7	3015.01	6404.66	5195.44	3852.85	3175.06	2633.84	6866.76	5521.18	4314.74	3000.86	2190.48	1290.1	1068.83	732.377	6589.15	3410.82	2180.73	1509.82	1072.92	869.882	1.3438e+06	990678	782436	596972	1.26812e+06	1.0287e+06	762865	628661	521500	1.35962e+06	1.09319e+06	854318	594170	433714	255440	211629	145011	1.30465e+06	675341	431785	298943
puta	b1014	[e]	143.81	1320			4.08628													2.4329	12.7571				10.0513		13.9311			5393.89													3211.43	16839.4				13267.7
putp	b1015	[er]	54.344	502		52.2446	110.71	69.9737										177.086						90.6	141.893	88.6499	80.3683	61.1702	26226.8	55576.3	35126.8										88897						45481.2	71230.1	44502.2
efeo	b1018		41.137	375		350.623	441.854	382.947	487.038	344.584	443.936	387.583	423.884	472.154	366.585	351.356	370.57	515.293	476.665	459.709	432.241	492.863	296.068	370.748	355.141	298.2	757.857	149.588	131484	165695	143605	182639	129219	166476	145344	158956	177058	137469	131758	138964	193235	178749	172391	162090	184824	111026	139030	133178	111825
ghra	b1033		35.343	312		381.602	436.811	402.173	390.867	392.667	433.014	405.234	368.621	344.332	372.107	372.961	399.919	387.448	393.682	333.359	289.244	290.783	400.908	403.119	372.86	372.342	361.263	311.704	119060	136285	125478	121950	122512	135100	126433	115010	107432	116097	116364	124775	120884	122829	104008	90244.2	90724.4	125083	125773	116332	116171
ycdx	b1034	[er]	26.89	245		220.102	197.396	189.584	207.366	244.091	228.288	202.821	194.87	193.147	219.516	207.566	239.881	215.1	180.209	184.774	167.419	129.412	188.144	203.619	174.221	171.117	162.459	151.209	53924.9	48362	46448.2	50804.8	59802.4	55930.6	49691.2	47743.1	47321	53781.3	50853.7	58770.9	52699.5	44151.2	45269.7	41017.6	31705.9	46095.4	49886.7	42684.2	41923.6
ycdy	b1035	[r]	20.724	184		302.786	317.454	346.885	330.503	297.624	281.726	332.329	339.545	365.651	247.468	250.75	333.856	330.57	311.372		328.892	320.535		326.964	359.224	363.917	339.046	360.783	55712.6	58411.5	63826.8	60812.5	54762.8	51837.6	61148.6	62476.3	67279.7	45534.1	46137.9	61429.6	60824.8	57292.5		60516	58978.4		60161.4	66097.2	66960.8
ymdb	b1045		18.88	177
opgg	b1048		57.912	511		1136.15	1101.63	1064.18	1061.58	1086.53	1131.93	1061.92	1072.41	1033.78	1011.14	1022.38	1063.27	1168.38	1154.81	1015.4	1054.27	917.716	1107.5	1024.74	1033.39	965.325	1100.36	1034.16	580571	562933	543798	542470	555217	578416	542640	548003	528260	516695	522438	543331	597041	590110	518870	538733	468953	565934	523640	528062	493281
opgh	b1049		96.936	847		63.5197	52.8664	81.5012	74.0617	76.3319	63.2961		70.7985		67.7303					55.0125				66.7278	63.9631	65.7405	63.1392	58.6862	53801.2	44777.8	69031.5	62730.2	64653.1	53611.8		59966.3		57367.6					46595.6				56518.5	54176.8	55682.2
msyb	b1051		14.259	124		484.358	382.779	399.351		463.25	457.555	419.334	308.793	248.284	507.681										259.346	142.876			60060.4	47464.6	49519.5		57443	56736.8	51997.4	38290.4	30787.2	62952.4										32158.9	17716.7
ycei	b1056	[s]	20.912	191		300.006	498.52	199.198	164.972	319.841	235.75	267.7	177.736	167.4	342.481		269.665		186.478		99.4706		212.439	301.463	239.039	177.667		109.758	57301.2	95217.4	38046.7	31509.7	61089.6	45028.2	51130.6	33947.6	31973.4	65413.8		51506		35617.3		18998.9		40575.9	57579.5	45656.4	33934.5
sola	b1059	[e]	40.902	372		238.828	243.187	224.946	219.476	255.579	266.425	230.937	226.481	272.89	216.433	210.465	207.231	220.578	209.882	203.836	183.759	194.03	197.209	197.519	213.136	181.595	174.26	163.401	88844.1	90465.4	83680	81645.2	95075.4	99110.2	85908.4	84250.9	101515	80513	78292.8	77090.1	82055	78076	75827	68358.2	72179	73361.7	73477.2	79286.4	67553.2
pyrc	b1062	[f]	38.827	348		2059.94	2308.07	2301.42	2618.62	2062.84	2289.83	2229.57	2384.06	2634.35	2018.61	2392.9	2604.78	2836.01	2964.36	2906.03	2673.81	2828.78	2069.64	2622.35	2700.93	2747.99	2751.4	2711.79	716860	803209	800894	911280	717869	796859	775889	829654	916755	702478	832729	906464	986932	1.0316e+06	1.0113e+06	930485	984415	720233	912579	939924	956299
yceb	b1063		20.5	186		83.1182	102.937						129.072		80.3303	220.734				91.9251				91.7807		56.7015			15460	19146.3						24007.4		14941.4	41056.6				17098.1				17071.2		10546.5
grxb	b1064	[o]	24.35	215		3066.38	2810.03	2504.57	1905.94	2948.56	2721.17	2489.86	2128.52	1793.75	2548.35	2666.35	2356.38	1917.94	1497.82	1088.81	865.419	530.851	2747.44	2219.33	1603.96	1292.08	1015.16	863.312	659271	604156	538484	409777	633940	585052	535320	457632	385656	547895	573265	506623	412356	322032	234094	186065	114133	590701	477156	344851	277797
yceh	b1067	[s]	24.177	215		415.571	448.759	418.944	379.675	453.547	406.998	396.155	399.731	361.115	322.596				281.118		235.822	267.839		331.678	297.297	250.805	225.228	228.053	89347.7	96483.1	90073	81630.1	97512.6	87504.6	85173.3	85942.3	77639.7	69358.1				60440.3		50701.7	57585.4		71310.8	63918.8	53923
flgm	b1071	[knu]	10.34	97
flge	b1076	[n]	42.045	402											12.8115										22.1337	26.6099		12.167										5150.21										8897.76	10697.2
flgg	b1078	[n]	27.744	260				172.006																							44721.5
flgh	b1079	[n]	24.615	232			41.5692			31.6848	69.3636				91.5488	106.631		131.031		67.9996		57.3434		58.9343	56.6462	51.2317	55.5598			9644.05			7350.86	16092.3				21239.3	24738.5		30399.2		15775.9		13303.7		13672.8	13141.9	11885.7
flgi	b1080		38.169	365					43.2345																							15780.6
rne	b1084	[j]	118.2	1061		645.646	728.589	691.363	711.88	680.01	711.994	712.161	732.094	718.268	729.215	712.675	739.003	676.282	691.174	699.558	674.868	667.004	763.815	712.167	729.405	692.347	670.94	683.457	685031	773033	733536	755305	721491	755426	755603	776752	762082	773698	756148	784082	717536	733335	742232	716035	707691	810408	755609	773899	734580
rluc	b1086	[j]	36.026	319		71.8157	70.2857	72.5828	85.673	63.6272	64.8975	70.3403	87.2601		74.9075	77.277	77.5865			97.2921		108.411	78.2823	86.3208	72.8311	93.0851	101.09	105.954	22909.2	22421.2	23153.9	27329.7	20297.1	20702.3	22438.5	27836		23895.5	24651.4	24750.1			31036.2		34583	24972.1	27536.3	23233.1	29694.1
ycef	b1087	[d]	21.691	194		508.23	430.738	327.45	250.426	506.46	391.002	339.013	280.404	253.541	595.458	517.52	392.933	336.61	222.127					341.265	256.848	216.839	171.983	149.22	98596.5	83563.1	63525.4	48582.7	98253.2	75854.4	65768.6	54398.4	49186.9	115519	100399	76228.9	65302.3	43092.6					66205.5	49828.5	42066.8
yced	b1088	[r]	19.315	173		507.853	627.458	573.812	586.398	520.906	485.008	576.508	582.507	605.659	500.661	520.759	599.175	546.285	632.402	557.298	556.795		577.589	580.471	666.876	650.075	630.145	630.06	87858.5	108550	99269.5	101447	90116.7	83906.4	99735.8	100774	104779	86614.4	90091.3	103657	94507.3	109406	96412.5	96325.5		99922.9	100421	115369	112463
rpmf	b1089	[j]	6.4463	57		9162.01	10814.1	10822.8	12645.3	8545.81	10225	11747.4	11810.2	11038.8	9326.85	10990.9	13432.9	13498.2	16100.6	17299.8	16325.4	14021.6	9226.39	13891.3	15541.8	17517.1	16879.1	18005.6	522234	616406	616901	720784	487111	582826	669604	673179	629210	531630	626482	765675	769397	917734	986090	930547	799233	525904	791804	885885	998474
fabh	b1091	[i]	33.515	317		952.064	872.126	818.131	834.642	896.18	919.229	826.08	840.009	831.091	939.794	914.641	905.778	977.112	844.22	802.537	847.974	1023.61	935.425	928.291	962.746	903.758	858.402	913.404	301804	276464	259348	264581	284089	291395	261868	266283	263456	297915	289941	287132	309745	267618	254404	268808	324483	296530	294268	305191	286491
fabd	b1092	[i]	32.417	309		3086.24	3257.83	3034.97	2906.51	3073.38	3177.98	3224.27	2970.06	2944.58	3389.19	3376.52	3471.92	3629.19	3393.41	3347.08	3098.68	2549.71	3584.62	3629.77	3628.81	3392.7	3430.6	3310.23	953648	1.00667e+06	937805	898110	949675	981996	996298	917750	909877	1.04726e+06	1.04335e+06	1.07282e+06	1.12142e+06	1.04856e+06	1.03425e+06	957492	787860	1.10765e+06	1.1216e+06	1.1213e+06	1.04835e+06
fabg	b1093	[iqr]	25.56	244		4126.78	4266.92	4323.62	4138.88	4105.63	4369.43	4433.64	4316.8	4276.9	4466.54	4529.33	4979.24	5063.32	5147.66	5168.16	4919.89	5090.07	4741.08	5189.28	5429.28	5058.36	5138.08	5217.59	1.00694e+06	1.04113e+06	1.05496e+06	1.00989e+06	1.00177e+06	1.06614e+06	1.08181e+06	1.0533e+06	1.04356e+06	1.08984e+06	1.10516e+06	1.21494e+06	1.23545e+06	1.25603e+06	1.26103e+06	1.20045e+06	1.24198e+06	1.15682e+06	1.26619e+06	1.32474e+06	1.23424e+06
acpp	b1094	[iq]	8.6394	78		17091.3	15368.8	12558.5	13039.1	16134.3	16890.7	15579.4	12089.6	11811.1	19041.2	20517.7	20494.3	18360.6	15686.8	14533.9	11718.4	5379.41	19141.2	19131.1	16772.4	16396.9	13385.5	13726.1	1.33312e+06	1.19877e+06	979561	1.01705e+06	1.25847e+06	1.31748e+06	1.2152e+06	942990	921266	1.48521e+06	1.60038e+06	1.59855e+06	1.43213e+06	1.22357e+06	1.13364e+06	914034	419594	1.49301e+06	1.49222e+06	1.30825e+06	1.27895e+06
fabf	b1095	[iq]	43.045	413		535.349	590.308	617.728	569.14	483.593	538.382	624.1	622.364	636.218	533.373	555.818	647.188	762.625	814.234	833.335	931.342	932.705	535.562	803.416	883.387	896.407	947.865	1037.68	221099	243797	255122	235055	199724	222352	257753	257036	262758	220283	229553	267289	314964	336279	344167	384644	385207	221187	331811	364839	370216
yceg	b1097	[r]	38.247	340			9.15511			10.4706					10.2984											8.8123	7.78437	9.7784		3112.74			3559.99					3501.46											2996.18
tmk	b1098	[f]	23.783	213																								32.4832
ptsg	b1101	[g]	50.676	477		4741.13	5898.42	5754.44	4864.87	4424.35	4967.96	5854.31	5475.08	4943.98	2452.09	3107.23	5104.03	5703	5164.74	5452.37	5728.49	5054.25	2718.41	5677.26	6144.45	5588.47	5690.45	5280.55	2.26152e+06	2.81355e+06	2.74487e+06	2.32054e+06	2.11042e+06	2.36972e+06	2.79251e+06	2.61162e+06	2.35828e+06	1.16965e+06	1.48215e+06	2.43462e+06	2.72033e+06	2.46358e+06	2.60078e+06	2.73249e+06	2.41088e+06	1.29668e+06	2.70805e+06	2.9309e+06	2.6657e+06
hint	b1103		13.241	119		1963.98	1840.62	1644.68	1279	1997.76	1681.35	1600.72	1449.41	1367.53	1855.68	1606.95	1609.05	1422.74	1198.29	1180.07	920.915	676.419	1558.42	1532.67	1337.04	1188.21	1072.36	879.65	233714	219034	195717	152201	237733	200080	190486	172480	162736	220827	191227	191477	169306	142596	140429	109589	80493.9	185452	182387	159108	141397
lpob	b1105		22.515	213		327.489	305.135	247.322	287.124	338.265	354.055	331.092	315.771	256.262	363.038	355.384	288.26	263.504	243.559	220.578	182.285	172.32	377.56	305.078	235.811	200.121	176.051	183.832	69755.2	64993.7	52679.7	61157.3	72050.5	75413.7	70522.6	67259.2	54583.7	77327.1	75696.8	61399.5	56126.4	51878	46983	38826.6	36704.2	80420.3	64981.7	50227.8	42625.9
nagz	b1107	[g]	37.594	341			53.2485		51.5275	52.12	50.2723					42.9396		48.0826			56.6155				49.1289		45.4819	43.6794		18157.7		17570.9	17772.9	17142.9					14642.4		16396.2			19305.9				16753
ycfp	b1108		21.226	180		1198.94	1070.19	1031.8	753.826	1111.04	949.851	1072.84	846.816	753.75	1271.28	1245.17	1063.28	851.528	640.974	593.658	587.402	385.571	1470.25	794.28	603.05	650.222	551.942	522.177	215809	192634	185724	135689	199987	170973	193110	152427	135675	228831	224131	191390	153275	115375	106858	105732	69402.7	264644	142970	108549	117040
ndh	b1109	[c]	47.358	434		154.626	171.193	202.52	301.938	166.978	168.087	224.893	243.075	304.484	170.935	172.05	162.415	180.66	142.952	257.301	303.987	378.633	177.021	150.675	163.521	206.493	248.348	329.172	67107.8	74297.8	87893.8	131041	72468.4	72949.9	97603.5	105495	132146	74185.8	74669.6	70487.9	78406.2	62041.3	111668	131930	164327	76827	65393.1	70968.3	89618
mfd	b1114	[lk]	129.98	1148		62.3542	72.0427	73.2209	69.2579	77.3871	64.6595	75.1785	96.985	89.0497	83.6043	86.1584	101.497	110.933	64.5666			78.4161		78.4738	72.3415	79.3386	75.5078	70.1043	71582.7	82705.1	84057.6	79508	88840.4	74229.1	86304.9	111339	102229	95977.7	98909.8	116519	127351	74122.5			90021.7		90087.9	83048.1	91080.7
lold	b1117		25.438	233		128.449	129.719	133.264	141.354	130.81	134.822	128.61	123.921	125.955	131.759	252.379		123.479					157.182	125.361	122.063	107.235	109.567	116.884	29928.5	30224.5	31050.5	32935.5	30478.7	31413.5	29966.1	28873.7	29347.4	30699.8	58804.3		28770.7					36623.5	29209.1	28440.6	24985.8
lole	b1118	[m]	45.344	414						7.91682																							3277.56
cobb	b1120	[k]	26.716	242		303.895		271.31		388.037	375.732	318.297	277.266	280.814	312.18							38.6376			281.955		212.48	233.781	73542.7		65657		93905	90927.3	77027.9	67098.5	67956.9	75547.6							9350.31			68233.1
potd	b1123	[e]	38.867	348		2992.24	2795.87	2239.74	2079.38	2902.88	2906.9	2566.77	2128.62	2106.79	3748.35	3252.46	2950.28	3130	2557.71	2350.56	2091.25	446.059	3569.23	3294.56	2926.04	2418.71	4270.59	2093.44	1.0413e+06	972964	779428	723625	1.0102e+06	1.0116e+06	893235	740758	733162	1.30443e+06	1.13186e+06	1.0267e+06	1.08924e+06	890083	817997	727757	155229	1.24209e+06	1.14651e+06	1.01826e+06	841712
pota	b1126	[e]	43.028	378		138.35	151.999	151.6	175.902	130.334	138.618	170.515	172.089	211.188	129.432	127.345	151.782	146.626	155.728	187.178	227.05	254.866	142.82	151.36	178.515	206.843	212.306	253.982	52296.4	57455.7	57304.6	66491	49266.1	52397.6	64454.7	65049.7	79829	48925.3	48136.4	57373.6	55424.7	58865.2	70753.2	85825	96339.4	53986	57213.9	67478.6	78186.6
pept	b1127	[e]	44.923	408		198.586	153.281	143.195	117.146	234.265	163.363	157.934	136.189	107.458	182.454	144.611	134.104				92.8952			120.358	94.9506	79.2184	64.6793	58.9881	81023	62538.8	58423.7	47795.7	95580	66651.9	64437.2	55565	43843.1	74441.1	59001.1	54714.3				37901.2			49106	38739.8	32321.1
ycfd	b1128		42.578	373		186.268	170.65	156.506	150.137	182.257	192.526	182.158	142.456	141.816	182.815	199.039		192.332				141.666	141.235	160.424	157.104	148.908	145.51	123.988	69478	63652.4	58376.6	56001.2	67982	71812.3	67944.9	53136.1	52897.4	68190.1	74241.4		71739.7				52841.3	52680.6	59838.1	58600	55542.7
phop	b1130	[tk]	25.535	223		1258.7	1174.81	1107.94	975.912	1200.36	1250.27	1170.64	1057.69	1042.89	1046.4	1073.69	1029.78	1051.23	896.519	856.723	767.087	580.678	1109.51	924.286	861.299	757.128	761.635	657.602	280690	261983	247071	217628	267679	278811	261052	235865	232564	233347	239432	229641	234425	199924	191049	171061	129491	247421	206116	192070	168839
purb	b1131	[f]	51.542	456		1666.48	1898.35	2127.45	2523.47	1669.04	1819.24	2022.84	2408.88	2690.9	1938.85	2073.97	2378.59	2548.58	2627.97	2865.74	3140.2	3538.01	2086.15	2422.65	2741.86	2809.83	2966.27	3294.38	759913	865647	970119	1.1507e+06	761084	829575	922415	1.09845e+06	1.22705e+06	884118	945731	1.08464e+06	1.16215e+06	1.19835e+06	1.30678e+06	1.43193e+06	1.61333e+06	951286	1.10473e+06	1.25029e+06	1.28128e+06
hfld	b1132	[r]	22.947	213		20.9742	25.0865			30.4275		24.3777							26.5045			21.4943		26.0488			20.8812		4467.5	5343.43			6481.06		5192.45							5645.46			4578.29		5548.39
mnma	b1133		40.959	368		243.468	233.358	231.255	239.872	250.322	236.178	207.287	216.043	239.864	202.876	237.758	232.042	250.914	216.273	225.98	223.999	239.442		209.352	216.921	230.499	222.468	237.517	89596.3	85875.7	85101.8	88272.9	92118.5	86913.5	76281.7	79503.9	88270	74658.2	87495.1	85391.3	92336.5	79588.5	83160.6	82431.5	88114.8		77041.6	79826.8	84823.7
icd	b1136	[c]	45.756	416		31732.1	33002.6	27409.4	22887.6	31702	33161	29923.7	24669.7	22646	25935.3	29270.7	32537.9	33259.3	30500.8	26128	22392.7	19235.8	25705	31102.7	30623.8	27026.7	23728	20811.5	1.32006e+07	1.37291e+07	1.14023e+07	9.52123e+06	1.3188e+07	1.3795e+07	1.24483e+07	1.02626e+07	9.42072e+06	1.07891e+07	1.21766e+07	1.35358e+07	1.38359e+07	1.26883e+07	1.08693e+07	9.31538e+06	8.00208e+06	1.06933e+07	1.29387e+07	1.27395e+07	1.12431e+07
mine	b1174	[d]	10.235	88		1549.04	1517.04	1177.01	902.244	1553.8	1600.32	1320.24	1124.63	1183.71	1743.79	1676.38	1284.96	1173.16	1173.72	1101.88	782.425	538.526	1883.16	1272.7	1394.11	1087.45	1067.77	1015.63	136316	133500	103577	79397.5	136735	140828	116181	98967.5	104167	153453	147521	113076	103238	103287	96965	68853.4	47390.3	165718	111997	122682	95695.4
mind	b1175	[d]	29.614	270		4270.25	3819.77	3127.48	2673.52	4203.14	4239.54	3538.22	2911.61	2741.42	3991.93	3932.84	3490.06	3205.58	2743.18	2415.7	2297.76	1858.61	4297.74	3531.09	3183.01	2763.33	2509.31	2481.02	1.15297e+06	1.03134e+06	844419	721849	1.13485e+06	1.14468e+06	955320	786133	740184	1.07782e+06	1.06187e+06	942317	865507	740659	652238	620394	501824	1.16039e+06	953395	859412	746098
minc	b1176	[d]	24.775	231		122.243	118.792	108.489		172.348			134.718		112.485			102.53		107.868				103.305		92.2819	116.701	104.063	28238.1	27440.9	25061		39812.4			31119.8		25984.1			23684.4		24917.6				23863.4		21317.1
ycgl	b1179		11.247	97		459.712	473.737	520.745	561.14	492.151	464.828	564.952	647.167	506.355	423.367	412.149	414.799		420.608	398.79	549.108	585.145	415.526	454.587	482.855	381.61	388.561	423.545	44592.1	45952.5	50512.3	54430.6	47738.7	45088.3	54800.4	62775.2	49116.4	41066.6	39978.4	40235.5		40799	38682.6	53263.4	56759	40306	44094.9	46836.9	37016.1
ycgm	b1180	[q]	23.711	219		79.4656	69.7163	62.5408	50.7417	102.442	81.6399	51.6777											92.5762	42.0235					17403	15267.9	13696.4	11112.4	22434.8	17879.1	11317.4											20274.2	9203.14
nhab	b1186	[p]	56.728	513					107.53			56.5774						31.854	41.9154					100.743	91.1269		91.4001	88.3447				55163.1			29024.2						16341.1	21502.6					51681.3	46748.1
fadr	b1187	[k]	26.968	239		116.075	101.085	90.0908			103.662	88.8281	81.6742	79.6314	115.912		120.037					84.0965		93.7772	102.526	88.1259	93.5816	86.4153	27742	24159.4	21531.7			24775.2	21229.9	19520.1	19031.9	27703		28688.8					20099.1		22412.8	24503.7	21062.1
dada	b1189	[e]	47.607	432		260.189	373.556	297.027	223.352	295.57	288.979	271.825	249.782	216.427	356.334	372.133	465.34	359.821	490.826	451.224	556.951	533.837	217.341	517.088	469.278	518.707	572.173	540.354	112401	161376	128316	96488.1	127686	124839	117428	107906	93496.3	153936	160761	201027	155443	212037	194929	240603	230618	93891.2	223382	202728	224082
dadx	b1190	[m]	38.844	356		102.647	89.6656		28.4504						201.404									138.279	62.5448	87.7354		83.414	36542.4	31921		10128.4						71699.9									49227.5	22266	31233.8
emta	b1193	[m]	22.226	203		128.476	129.43	153.4	227.17		101.53	125.318	167.965	180.041	96.6737									174.534	171.433	185.916	144.127	215.253	26080.5	26274.2	31140.3	46115.5		20610.7	25439.5	34097	36548.4	19624.8									35430.4	34800.8	37741
ycgr	b1194		27.857	244		43.7956	63.7617	28.489	14.1378	22.0906	77.6786	64.1087	1035.13		30.1843	52.4425	82.9232	95.6459	140.993	231.833	93.5692	98.2202		89.5496	74.79	76.5579	92.6241	59.3327	10686.1	15557.9	6951.33	3449.63	5390.11	18953.6	15642.5	252571		7364.97	12796	20233.3	23337.6	34402.2	56567.2	22830.9	23965.7		21850.1	18248.8	18680.1
trea	b1197	[g]	63.636	565		131.472	162.338	48.1563	41.7917	159.957	122.564	92.3123	72.3086	34.3539	116.406	129.112							43.3651	111.814	86.5969	42.6413			74281.7	91720.8	27208.3	23612.3	90375.5	69248.9	52156.5	40854.3	19410	65769.4	72948.3							24501.3	63174.9	48927.2	24092.3
dham	b1198		51.448	472		68.0136	81.0316	96.8799	133.889	68.6715	74.4303	86.5997	108.82	126.833	65.4022	75.5509	60.508		52.6561		98.4424	109.617		56.4091	56.5226	58.5738	70.6757	92.4018	32102.4	38246.9	45727.3	63195.7	32413	35131.1	40875.1	51363.3	59865.1	30869.8	35660	28559.8		24853.7		46464.8	51739.4		26625.1	26678.6	27646.8
dhal	b1199	[g]	22.632	210		288.991	142.052	144.794	107.678	148.1	141.329	128.131	131.384	113.023	209.151	135.867				100.547	89.4281		157.977	116.996	123.364	112.055	120.93		60688.2	29831	30406.7	22612.4	31101	29679.2	26907.6	27590.6	23734.9	43921.8	28532.1				21114.8	18779.9		33175.1	24569.1	25906.5	23531.6
dhak	b1200		38.215	356		683.285	583.955	489.333	376.35	694.085	595.66	453.698	389.281	377.803	832.106	715.831	569.591	443.931	339.028	304.601	255.935	241.309	834.992	508.085	375.194	325.068	291.568	256.439	243250	207888	174203	133981	247094	212055	161517	138584	134498	296230	254836	202774	158040	120694	108438	91112.8	85905.9	297257	180878	133569	115724
ychf	b1203	[j]	39.667	363		1037.36	1207.26	1487.62	1569.03	1022.91	1161.01	1292.96	1477.34	1582.37	1212.3	1267.19	1466.85	1636	1718.1	1939.38	1849.43	2009.36	1300.12	1638.82	1790.02	1795.49	1795.81	1912.3	376561	438234	540005	569556	371317	421447	469345	536275	574400	440066	459989	532466	593867	623670	703994	671342	729397	471943	594892	649779	651762
pth	b1204	[j]	21.082	194		180.318	173.39	204.693	167.068	164.868	169.08	185.396	183.229	172.521	192.43	237.105	219.478	247.872		211.808	251.801	254.265	231.042	225.018	221.254	250.877	231.183	272.185	34981.7	33637.7	39710.5	32411.1	31984.4	32801.5	35966.9	35546.4	33469	37331.4	45998.5	42578.7	48087.1		41090.7	48849.4	49327.4	44822.2	43653.6	42923.3	48670.2
prs	b1207		34.218	315		2909.93	3326.1	3237.56	3267.42	2941.93	3147.17	3339.33	3238.85	3285.33	3305.73	3584.76	3892.41	4059.05	4137.02	4210.28	4257.91	4498.48	3370.77	3883.82	4051.36	4193.63	4114.69	4290.93	916629	1.04772e+06	1.01983e+06	1.02924e+06	926707	991359	1.05189e+06	1.02024e+06	1.03488e+06	1.04131e+06	1.1292e+06	1.22611e+06	1.2786e+06	1.30316e+06	1.32624e+06	1.34124e+06	1.41702e+06	1.06179e+06	1.2234e+06	1.27618e+06	1.32099e+06
ispe	b1208	[i]	30.925	283		80.0934																							22666.4
lolb	b1209	[m]	23.55	207		390.521	398.094	394.675	422.845	401.617	475.227	412.095	417.288	464.362	323.05	370.612	410.054	352.675	321.845	370.904	363.488	343.419		302.723	319.203	341.519	344.058	318.327	80837.9	82405.5	81697.7	87528.9	83134.8	98372.1	85303.7	86378.7	96122.9	66871.4	76716.7	84881.1	73003.8	66621.9	76777	75242	71087.7		62663.7	66074.9	70694.5
prfa	b1211	[j]	40.517	360				32.365	31.5618	24.6941			38.4866	37.451				32.878				36.7171		30.3122		34.4541	31.2174	38.5798			11651.4	11362.2	8889.86			13855.2	13482.4				11836.1				13218.1		10912.4		12403.5
kdsa	b1215	[m]	30.832	284		3341	3331.51	3247.14	2960.84	3431.03	3466.47	3334.19	3216.69	3178.89	3009.42	3200.23	3377.31	3247.37	3144.7	3250.21	2946.45	3201.81	3375.37	3136.22	3197.5	3099.48	2901.74	3013.47	948844	946148	922189	840880	974414	984478	946910	913540	902804	854676	908865	959156	922252	893095	923060	836792	909313	958605	890685	908091	880253
chab	b1217	[r]	8.9447	76
ychn	b1219	[p]	12.693	117		1586.41	1112.47	643.961		1577.05	1366.55	903.804	714.782	645.302	2008.16	1803.61	1398.94	860.969	808.883	735.755		553.916	1725.09	1023.03	1085.54	704.466	646.338	581.941	185610	130159	75343.4		184515	159886	105745	83629.4	75500.3	234955	211022	163676	100733	94639.3	86083.3		64808.1	201836	119694	127008	82422.5
narl	b1221	[tk]	23.927	216		476.78	506.165	518.704	442.317	499.008	489.741	519.335	487.434	474.857	367.983	358.229	415.551	439.995	404.151	365.66	272.521		363.851	394.887	392.896	355.834	313.218	291.507	102985	109332	112040	95540.4	107786	105784	112176	105286	102569	79484.2	77377.5	89759	95039	87296.6	78982.5	58864.5		78591.9	85295.6	84865.5	76860.1
puru	b1232	[f]	31.934	280		599.36	658.313	724.27	922.639	562.296	584.912	705.28	782.648	946.132	447.703	563.748	575.123	691.761	718.029	851.385	925.844	1039.9	485.66	625.837	716.22	803.805	831.859	902.644	167821	184328	202796	258339	157443	163775	197478	219142	264917	125357	157849	161035	193693	201048	238388	259236	291173	135985	175234	200542	225065
galu	b1236	[m]	32.942	302		1857.03	1839.23	1751.32	1713.16	1907.73	1733.75	1816.21	1720.61	1884.16	1766.61	1639.01	1639.65	1607.75	1547.96	1640.46	1624.29	1816.7	1863.15	1692.29	1708.82	1637.3	1485.92	1696.16	560822	555447	528898	517373	576135	523592	548497	519623	569017	533515	494980	495174	485540	467484	495419	490536	548645	562670	511072	516062	494464
hns	b1237	[r]	15.539	137		48047.9	42600.6	36076.6	29082.9	46846.1	45562	40105.3	34483.9	30152.7	48968	46546.4	45659.5	40892.8	35171.8	32083.1	29511.2	24569.8	50526.4	41510.4	36500.9	32171.2	29816.3	26924	6.58257e+06	5.83628e+06	4.9425e+06	3.98435e+06	6.41791e+06	6.24199e+06	5.49443e+06	4.72429e+06	4.13092e+06	6.70861e+06	6.37686e+06	6.25534e+06	5.60231e+06	4.81853e+06	4.39538e+06	4.04304e+06	3.36607e+06	6.92212e+06	5.68693e+06	5.00062e+06	4.40745e+06
tdk	b1238	[f]	23.456	205					110.863	71.7718							70.2512								94.8818		110.178	98.0827				22727	14713.2							14401.5								19450.8
adhe	b1241	[c]	96.126	891		6074.08	5382.35	5604.19	4860.09	6146.27	5714.86	5677.29	5811.97	5483.01	5694.47	5255.06	4636.4	4003.59	3479.49	3232.3	3171.41	3222.97	5529.79	3902.92	3473.84	3071.86	3059.68	2910.92	5.412e+06	4.79568e+06	4.99333e+06	4.33034e+06	5.47633e+06	5.09194e+06	5.05847e+06	5.17846e+06	4.88536e+06	5.07377e+06	4.68226e+06	4.13103e+06	3.5672e+06	3.10023e+06	2.87998e+06	2.82572e+06	2.87167e+06	4.92704e+06	3.4775e+06	3.09519e+06	2.73703e+06
oppa	b1243	[e]	60.898	543		9445.72	8995.94	8075.03	7610.69	9520.73	9265.15	8690.38	8070.5	7693.88	15334.3	15660.9	16845	18634.8	17052.2	15775.1	16303.8	8601.38	13593.9	15987.3	15674.5	14226.7	24714.2	15430.8	5.12903e+06	4.8848e+06	4.38474e+06	4.1326e+06	5.16975e+06	5.03098e+06	4.71888e+06	4.38228e+06	4.17777e+06	8.32653e+06	8.50386e+06	9.14684e+06	1.01187e+07	9.25935e+06	8.56589e+06	8.85299e+06	4.67055e+06	7.38149e+06	8.68111e+06	8.51126e+06	7.72509e+06
oppb	b1244	[ep]	33.443	306			35.9195			49.5116																				10991.4			15150.6
oppc	b1245	[ep]	33.022	302			38.8325	41.7591	44.8245															92.834		88.1189	68.6392	119.652		11727.4	12611.2	13537															28035.9		26611.9
oppd	b1246		37.188	337		68.6837	78.9377	62.6961		64.9631	61.2412	55.2768	61.1324	46.9847	113.706	93.1103			127.947		141.601			118.145	126.721	140.998	147.627	146.892	23146.4	26602	21128.6		21892.6	20638.3	18628.3	20601.6	15833.8	38318.9	31378.2			43118.3		47719.7			39814.9	42704.9	47516.2
oppf	b1247	[e]	37.197	334		150.168	190.494	167.117	168.726	146.932	178.768	187.8	175.624	191.531	233.818	253.431	330.832	358.569	366.226	436.73	451.322	578.106	211.009	330.176	357.824	364.829	441.596	491.736	50156.2	63624.9	55817.2	56354.5	49075.3	59708.5	62725.3	58658.5	63971.5	78095.2	84646	110498	119762	122319	145868	150741	193087	70477.1	110279	119513	121853
ycii	b1251	[s]	10.602	98		1597.72	1461.07	1231.7	937.753	1581.49	1486.88	1409.44	1078.26	1025.41	1229.63	1323.95	1222.1	969.23	905.8	748.767	614.079		1634.96	1086.6	841.103	684.685	648.208	564.149	156577	143185	120707	91899.8	154986	145714	138125	105670	100491	120504	129747	119766	94984.5	88768.4	73379.2	60179.8		160226	106487	82428.1	67099.1
tonb	b1252	[m]	26.094	239																						27.9459		21.6916																					6679.06
ycia	b1253	[i]	14.23	132		94.365			106.23																112.868				12456.2			14022.3																14898.6
ompw	b1256	[m]	22.928	212		354.816	322.594	446.458		571.031	283.605	488.448			1027.46									764.005	558.923			364.816	75221	68389.9	94649		121059	60124.3	103551			217822									161969	118492
ycif	b1258	[s]	18.597	166		1391.26	701.909	624.503	362.098	2142.09		731.569	565.057	478.294	3484.91									597.945	411.522	330.557	282.898	267.147	230949	116517	103667	60108.3	355588		121440	93799.4	79396.9	578495									99258.8	68312.7	54872.4
trpa	b1260	[e]	28.724	268		2941.24	3071.48	3300.49	3800.23	2992.08	2887.15	3054.3	3547.47	3856.64	1622.63	1651.24	1677.41	1616.27	1364.74	1255.6	876.98	516.881	1671.54	1618.89	1544.97	1315.24	986.92	762.605	788252	823155	884532	1.01846e+06	801878	773757	818553	950723	1.03358e+06	434864	442533	449546	433160	365752	336500	235031	138524	447972	433862	414052	352485
trpb	b1261	[e]	42.983	397		2024.79	2073.02	2405.75	2871.63	2002.79	2131.48	2205.27	2665.9	2922.32	1100.64	1110.08	1170.11	1176.29	1036.43	875.511	716.663	411.85	1125.56	1118.35	1119.47	883.69	716.507	532.44	803840	822989	955083	1.14004e+06	795107	846198	875491	1.05836e+06	1.16016e+06	436954	440703	464534	466988	411464	347578	284515	163504	446846	443987	444431	350825
trpc	b1262	[e]	49.361	452		571.37	551.949	617.38	717.179	517.081	542.31	563.299	655.03	756.797	274.995	323.961	290.678	276.257	260.276	430.935	142.787		460.869	291.64	269.866	223.56	177.33	122.649	258259	249481	279056	324165	233721	245124	254611	296074	342072	124298	146430	131386	124868	117645	194782	64539.7		208313	131821	121979	101049
trpd	b1263	[eh]	56.869	531		287.07	304.356	348.447	410.713	285.281	282.078	309.844	385.145	416.979	121.897	146.552	154.691	141.77	128.35	97.9264		47.2033	141.514	129.323	131.993	105.74	81.7396	60.713	152434	161613	185025	218089	151484	149783	164527	204512	221416	64727.5	77819.1	82140.7	75279.8	68154.1	51998.9		25064.9	75143.7	68670.3	70088.3	56148.2
trpe	b1264	[eh]	57.494	520		309.826	324.567	395.217	485.379	308.808	320.485	340.625	435.603	475.085	145.093	150.632	154.781	205.209	149.731	106.351	89.5083	66.4532	170.86	156.064	170.753	122.004	103.542	77.811	161109	168775	205513	252397	160580	166652	177125	226513	247044	75448.1	78328.4	80486.4	106709	77860.3	55302.4	46544.3	34555.7	88847.4	81153.2	88791.6	63442.3
ycio	b1267		23.211	206		396.304	390.84	313.056	269.22	422.066	368.874	325.736	297.263	290.821	407.147	399.038		299.439	302.936	220.801	199.381		477.918	350.272		247.628	221.995	255.337	81638.6	80513	64489.6	55459.2	86945.5	75988.1	67101.5	61236.3	59909.1	83872.2	82201.8		61684.4	62404.8	45484.9	41072.5		98451.2	72156.1		51011.4
rlub	b1269	[j]	32.711	291		198.014	257.633	282.096	311.501	237.591	248.933	276.41	283.513	313.431	209.421	239.292	301.677	346.903	336.888	362.113	417.112	324.568		323.835	387.62	443.088	401.117	467.883	57622.2	74971.3	82090.1	90646.7	69139	72439.6	80435.3	82502.4	91208.4	60941.5	69634.1	87788.1	100949	98034.4	105375	121380	94449.3		94235.9	112798	128939
ycik	b1271	[iqr]	27.933	252		157.851	182.901	126.438	93.7736						141.284											70.7716	81.406	74.6366	39778.4	46091.1	31862.4	23630.9						35603.7											17834.4
sohb	b1272	[ou]	39.366	349		190.956	224.718	281.374	296.859	215.096	196.67	252.601	304.026	295.704	154.813	173.346	186.228	186.687	194.362	192.815	214.602	292.394	224.505	199.451	207.954	220.134	226.638	230.07	66643.6	78426.6	98199.6	103604	75068.6	68638	88157.9	106105	103201	54029.8	60497.6	64993.4	65153.7	67832.3	67292.4	74896	102046	78352.3	69608.3	72575.9	76826.8
ycin	b1273		9.3855	83		528.083	467.155	393.03	301.522	610.681		465.583	344.774	335.601	665.267	742.625							633.375	493.832	426.633	457.622	254.294		43830.9	38773.8	32621.5	25026.3	50686.5		38643.4	28616.3	27854.9	55217.2	61637.9							52570.1	40988.1	35410.5	37982.6
topa	b1274	[l]	97.349	865		235.796	210.73	224.353	227.541	206.561	225.811	208.282	215.183	205.256	207.746	214.536	238.719	230.797	245.306	222.195	225.046	246.768	244.384	239.443	235.397	224.773	229.36	248.857	203963	182282	194065	196823	178676	195327	180164	186133	177547	179701	185573	206492	199639	212189	192199	194665	213454	211392	207118	203619	194429
cysb	b1275	[k]	36.15	324		191.989	227.449	235.787	257.297	208.422	221.537	273.456	287.082	273.001	189.374	188.676	210.004	219.077	220.426	186.184	212.872	202.122	186.133	212.364	212.761	210.598	196.475	181.895	62204.5	73693.6	76394.9	83364.3	67528.8	71778.1	88599.8	93014.7	88452.3	61357.3	61130.9	68041.2	70980.8	71418	60323.7	68970.5	65487.5	60307.2	68805.8	68934.6	68233.7
acna	b1276	[c]	97.676	891		1314.39	1082.66	755.67	495.264	1300.38	1127.2	868.296	623.208	474.089	1452.48	1251.27	976.83	807.554	693.048	439.057	342.067	241.301	1291.49	1025.36	854.556	556.062	392.856	342.689	1.17112e+06	964651	673302	441280	1.15864e+06	1.00433e+06	773652	555278	422413	1.29416e+06	1.11488e+06	870356	719531	617506	391200	304781	214999	1.15072e+06	913593	761410	495451
riba	b1277	[h]	21.836	196			100.502	118.048	107.018	98.8962	112.303	107.477	93.4192		101.926							87.9081	85.7617	98.5068	111.651	107.26	92.1307	105.45		19698.3	23137.5	20975.5	19383.7	22011.5	21065.6	18310.2		19977.4							17230	16809.3	19307.3	21883.6	21023
ycis	b1279	[s]	11.351	102
pyrf	b1281	[f]	26.35	245		229.666	276.933	306.196	402.08	238.11	281.242	289.346	349.751	430.804	232.105	294.958	373.393	411.974	428.816	440.296	489.979	455.532	342.54	361.574	403.637	440.7	441.628	481.812	56268.1	67848.6	75018	98509.7	58336.9	68904.2	70889.9	85688.9	105547	56865.8	72264.8	91481.4	100934	105060	107872	120045	111605	83922.2	88585.5	98891	107972
ycit	b1284	[kg]	27.602	249					24.3007	30.9969	36.5329													34.9604			31.1165					6050.87	7718.23	9096.7													8705.13
rnb	b1286	[k]	72.49	644		399.152	458.705	489.56	627.442	386.077	450.099	478.653	557.698	643.692	323.777	383.282	452.066	499.175	553.566	610.264	702.069	710.723	371.685	472.856	535.999	556.27	602.776	653.729	257054	295406	315277	404073	248634	289864	308253	359157	414537	208512	246833	291130	321469	356496	393010	452132	457706	239365	304519	345183	358238
yciw	b1287	[s]	42.219	375								26.9358																							10100.9
fabi	b1288	[i]	27.864	262		6821.13	7155.22	7205.44	7695.26	7122.58	7018.57	7116.31	7555.98	8135.9	7615.98	7461.32	8177.95	8635.91	8844.71	9347.39	8875.19	10431.7	8254.6	8810.26	9510.79	9466.46	9020.93	10016.1	1.78714e+06	1.87467e+06	1.88783e+06	2.01616e+06	1.86612e+06	1.83886e+06	1.86447e+06	1.97967e+06	2.13161e+06	1.99539e+06	1.95487e+06	2.14262e+06	2.26261e+06	2.31731e+06	2.44902e+06	2.3253e+06	2.7331e+06	2.16271e+06	2.30829e+06	2.49183e+06	2.48021e+06
sapa	b1294	[e]	61.564	547								24.9502																							13647.8
puua	b1297		53.177	472
puud	b1298		28.013	254		273.204	225.13			221.913	199.895																		69393.7	57182.9			56365.9	50773.3
puur	b1299	[k]	20.091	185						133.568		164.654																					24710.1		30461
puuc	b1300	[c]	53.418	495		98.9142	173.052		145.579	131.674	193.216	98.0565		60.6562	47.2755									110.688					48962.5	85661		72061.5	65178.8	95641.7	48538		30024.8	23401.4									54790.5
puue	b1302	[e]	44.729	421		71.5966	202.948	126.74		182.694														91.7091					30142.2	85441.2	53357.7		76914														38609.5
pspa	b1304	[kt]	25.493	222		2148.75	2225.97	1606.52	1243.5	2152.86	2009.5	1795.17	1478.21	1345.14	2021.74	2270.65	2709.27	2277.85	1923.88	1363.99	1223.18	964.357	1853.48	2910.24	2179.03	1543.06	1385.11	1251.44	477023	494165	356648	276056	477934	446108	398528	328162	298621	448827	504083	601459	505683	427101	302807	271546	214087	411472	646073	483745	342559
pspb	b1305		8.763	74		513.824					632.656	288.174			472.069									652.432		345.317	326.093	320.988	38023					46816.6	21324.9			34933.1									48280		25553.4
tyrr	b1323	[ke]	57.655	513		52.3018	45.4278	44.7027	37.5639	37.29	45.3636		43.4837		42.2729	43.6323										32.5169	28.1267	31.2007	26830.8	23304.4	22932.5	19270.3	19129.8	23271.5		22307.1		21686	22383.4										16681.2
tpx	b1324	[o]	17.835	168		19188.5	19925.5	17832.5	18276.5	19647.7	20231.2	20051.5	18046.3	18306.3	18417.7	18748.4	19905.3	19473.7	18445.7	16650.8	16139.1	13159.5	16499.3	17719.7	17064.1	16133.2	17168.3	15176.8	3.22367e+06	3.34748e+06	2.99587e+06	3.07045e+06	3.30082e+06	3.39885e+06	3.36864e+06	3.03179e+06	3.07546e+06	3.09418e+06	3.14973e+06	3.34409e+06	3.27159e+06	3.09887e+06	2.79734e+06	2.71137e+06	2.2108e+06	2.77187e+06	2.9769e+06	2.86676e+06	2.71037e+06
mppa	b1329	[e]	59.899	537				45.5778	32.7486	65.1627				27.0239	82.7771									51.4224	75.0371		63.4062				24475.3	17586	34992.4				14511.8	44451.3									27613.8	40294.9
uspe	b1333	[t]	35.706	316		259.427	277.411	236.469		239.248	83.0502	378.005	113.107	150.429	539.492	205.636								114.436	246.292		154.166		81979	87661.7	74724.2		75602.5	26243.9	119450	35741.9	47535.7	170479	64980.8								36161.9	77828.4
fnr	b1334	[t]	27.967	250		2214.69	3820.41	628.134	309.078	245.266					387.565	326.905	387.24	428.067				330.215		5461.62	734.768	357.256	2078.12	630.721	553673	955102	157033	77269.5	61316.5					96891.3	81726.2	96810.1	107017				82553.7		1.3654e+06	183692	89314
ttca	b1344		35.561	311					288.244																	59.9796		268.459				89643.7																	18653.7
uspf	b1376		16.016	144		8093.63	4980.05	2817.9	1471.73	6978.44	6838.19	4390.39	2249.64	1370.98	9135.87	7146.02	5734.66	3788.96	2600.44	1813.68	1207.25	761.885	8922.44	5005.53	3271.8	1911.39	1325.05	1000.59	1.16548e+06	717127	405777	211929	1.00489e+06	984699	632216	323948	197422	1.31556e+06	1.02903e+06	825791	545610	374464	261170	173844	109711	1.28483e+06	720796	471139	275240
ompn	b1377	[m]	41.219	377
ydbk	b1378	[c]	128.82	1174		31.9428	23.4452	24.2475	20.3254	31.5796	27.6848	22.981	24.8788	17.9568	38.638	33.645	30.236	28.8267	32.6156	24.2985		34.2389	36.7916	28.2388	27.3654	24.1884	21.6393	20.9615	37500.9	27524.7	28466.5	23862	37074.5	32501.9	26979.7	29207.8	21081.3	45361	39499.2	35497.1	33842.5	38290.7	28526.4		40196.5	43193.3	33152.4	32127	28397.2
ldha	b1380	[chr]	36.534	329		698.282	551.602	482.65	376.991	684.933	597.356	492.042	416.489	409.771	726.842	697.432	535.834	416.239		355.088	284.691	311.426	679.977	511.088	438.542	344.68	324.482	286.427	229735	181477	158792	124030	225343	196530	161882	137025	134815	239131	229455	176290	136943		116824	93663.4	102459	223712	168148	144280	113400
paay	b1400	[r]	21.324	196
ydbc	b1406	[c]	30.706	286		457.311	419.228	198.21		685.446	451.221	240.539			607.068								379.584			122.791			130791	119899	56687.9		196038	129049	68794.2			173621								108561			35118.1
azor	b1412	[i]	21.657	201		534.914	545.394	472.989	506.973	517.679	492.242	469.37	469.524	504.868	507.05	502.261	558.939	408.623	449.452	446.408	393.006	281.599	356.945	454.874	456.301	336.869	361.051	265.744	107518	109624	95070.8	101902	104054	98940.6	94343.3	94374.2	101478	101917	100954	112347	82133.3	90339.9	89727.9	78994.2	56601.3	71745.9	91429.7	91716.6	67710.6
hrpa	b1413		149.03	1300		28.3231	33.1748	25.4084	32.4766		27.6831	30.6525		29.9767	26.7171	30.4551		30.5021	72.8311	9.4766	38.4959	34.2368		28.7567	30.6694	32.5167	34.7551	40.4362	36820	43127.2	33030.9	42219.6		35988	39848.2		38969.7	34732.2	39591.6		39652.7	94680.4	12319.6	50044.7	44507.9		37383.7	39870.2	42271.7
ydcf	b1414	[s]	29.705	266		188.229	119.271	87.6109	60.9359	160.755	134.793	98.7133	77.067	61.2822	179.266	149.28	108.262	81.7965	65.1838	49.0011		44.2075	80.1313	89.1227	77.2005	47.1113	45.3489	39.4352	50069	31726.1	23304.5	16208.9	42760.9	35854.9	26257.7	20499.8	16301.1	47684.9	39708.4	28797.6	21757.9	17338.9	13034.3		11759.2	21314.9	23706.6	20535.3	12531.6
alda	b1415	[c]	52.272	479		33062.3	24207.8	11897.5	4780.73	26874.1	24532.9	15625.6	8317.49	4704.04	27534.5	24293.8	20442	20048.2	13913.5	9002.38	5732.74	2304.55	21560.5	23900	18143	11121.5	6835.5	4150.07	1.58369e+07	1.15955e+07	5.6989e+06	2.28997e+06	1.28727e+07	1.17512e+07	7.48467e+06	3.98408e+06	2.25323e+06	1.3189e+07	1.16367e+07	9.79173e+06	9.60311e+06	6.66455e+06	4.31214e+06	2.74598e+06	1.10388e+06	1.03275e+07	1.14481e+07	8.69051e+06	5.32719e+06
trg	b1421	[nt]	58.898	546					2.31282						8.48972												5.06716					1262.8						4635.39
ydci	b1422	[k]	33.401	307			107.714	87.7141	49.066	83.2828						121.888								126.448	108.391	107.637				33068.2	26928.2	15063.3	25567.8						37419.6								38819.4	33276.2	33044.5
opgd	b1424		62.757	551			38.8155	34.6225	29.0875						43.8363									48.7447	46.5056	33.9802	33.8963	36.3902		21387.4	19077	16027.2						24153.8									26858.3	25624.6	18723.1
ydch	b1426		8.8782	74						500.105					962.957																		37007.8					71258.8
tehb	b1430	[qr]	22.53	197		261.403	249.871	263.51	230.979	255.036	241.976	288.216	197.135	189.623	233.112						209.311			264.889	229.195	201.222	204.066	202.557	51496.5	49224.5	51911.5	45502.9	50242	47669.2	56778.5	38835.5	37355.8	45923.1						41234.3			52183.1	45151.4	39640.7
ydcl	b1431		24.427	222		2405.09	1704.03	1249.99	859.739	2409.78	1958.59	1549.88	1034.96	899.378	2556.94	2095.99	1475.37	1074.88	823.811	567.986	525.809	422.596	2733.25	1158.11	877.646	670.553	442.412	419.274	533931	378296	277497	190862	534972	434806	344074	229762	199662	567641	465311	327533	238622	182886	126093	116729	93816.4	606781	257101	194837	148863
ydcs	b1440	[e]	42.295	381		918.02	805.481			553.366	323.73				496.73	462.354	453.43						440.094	449.777					349766	306888			210833	123341				189254	176157	172757						167676	171365
ydct	b1441		37.04	337
prr	b1444		50.829	474		835.99	554.063		132.231	963.714	893.492	240.992			1681.27	918.031	773.419	579.453					708.184	702.013					396259	262626		62677.7	456801	423515	114230			796923	435147	366600	274661					335679	332754
ydcy	b1446		8.7998	77		211.843	215.591	211.48	243.862	216.196		235.232	236.924		192.454	203.012		201.73	169.536	149.873				192.443		198.423	153.361	200.592	16311.9	16600.5	16284	18777.3	16647.1		18112.9	18243.2		14819	15631.9		15533.2	13054.3	11540.3				14818.1		15278.6
cura	b1449		37.609	345			153.504	126.824	102.928	224.176	191.934	150.982	117.839	86.2088	276.904	122.111	148.598							110.129	67.5096	56.6853				52958.9	43754.3	35510.2	77340.6	66217.3	52088.9	40654.5	29742	95532	42128.3	51266.3							37994.6	23290.8	19556.4
ynce	b1452	[s]	38.612	353		872.462	1106.03	1138.69	1181.22	889.162	1049.05	1212.5	1186.25	1313.15	876.554	1048.08	1469.48	1806.06	1669.69	1454.52	1299.48	509.288	913.324	1539.5	1474.84	1119.94	1890.19	518.051	307979	390428	401959	416971	313874	370315	428012	418748	463542	309424	369972	518726	637537	589400	513444	458715	179779	322403	543442	520618	395340
yddj	b1470		12.871	111		268.794	313.428	312.995		310.128	307.82	256.431	228.758	255.109										88.024	75.179		59.7991	44.0279	29836.1	34790.5	34742.5		34424.2	34168	28463.9	25392.1	28317.1										9770.67	8344.87
adhp	b1478		35.379	336
maea	b1479		63.197	565		543.767	613.485	657.903	702.269	549.694	589.69	612.796	719.737	690.056	541.16	649.448	698.383	815.109	1005.01	1048.31	994.807	866.455	490.387	736.051	955.756	1026.63	1032.63	946.023	307228	346619	371715	396782	310577	333175	346230	406651	389881	305755	366938	394586	460536	567833	592295	562066	489547	277069	415869	540002	580043
sra	b1480		5.0958	45		9238.15	8291.5	6913.7	5219.38	9122.84	8415.53	7815.19	6020.09	5158.97	9095.99	8441.98	9229.56	6978.68	5235.58	3554.88	2405.28	1430.51	10036.9	7916.35	6531.76	4692.31	2525.9	2096	415717	373118	311116	234872	410528	378699	351684	270904	232154	409320	379889	415330	314041	235601	159970	108237	64372.8	451659	356236	293929	211154
osmc	b1482	[o]	15.088	143		13282.9	7719.99	5625.63	3341.1	12629.7	10552.1	6692.77	4295.86	3187.71	14357.6	12862.3	7027.12	4749.44	2192.88	1275.61	891.025	650.898	17713.7	5467.56	2869.34	1607.95	1134.68	888.32	1.89945e+06	1.10396e+06	804466	477777	1.80604e+06	1.50895e+06	957066	614307	455843	2.05313e+06	1.8393e+06	1.00488e+06	679170	313582	182412	127417	93078.3	2.53306e+06	781860	410316	229937
ddpa	b1487	[e]	57.641	516		46.4207		18.8081		36.0058					50.5013													10.3047	23953.1		9704.99		18579					26058.7
gadc	b1492	[e]	55.076	511											629.824	50.5813							68.0152															321840	25847.1							34755.8
gadb	b1493	[e]	52.668	466		1135.59	852.199	943.305	967.035	1196.65	434.905	530.916	722.49	252.576	1940.57	535.748	1229.4	934.933			264.558		517.951	947.799	1419.4	532.547		182.09	529185	397125	439580	450639	557639	202666	247407	336680	117700	904307	249659	572901	435679			123284		241365	441674	661439	248167
yden	b1498	[p]	62.801	560		280.217		97.8491		719.986		184.205			307.699	400.431	740.335	202.237	179.592				96.8621	108.323	306.796	161.48			156921		54795.5		403192		103155			172312	224241	414588	113253	100572				54242.8	60660.9	171806	90428.8
lsrr	b1512		33.796	317
lsrb	b1516	[g]	36.684	340		395.923				151.842					730.435	182.886	310.282						345.102	216.918					134614				51626.2					248348	62181.2	105496						117335	73752.2
lsrf	b1517	[g]	31.892	291						262.341					376.016	353.865	206.733						129.869										76341.1					109421	102975	60159.4						37791.7
ydej	b1537	[r]	18.321	172						61.9301																							10652
dcp	b1538	[e]	77.515	681		416.347	407.045	340.826	288.154	433.337	447.874	361.093	313.009	308.225	436.292	395.784	386.853	377.186	264.843	267.878	248.72	235.612	436.752	358.539	330.106	271.234	252.605	232.964	283533	277198	232103	196233	295102	305003	245905	213159	209901	297115	269529	263447	256864	180358	182425	169378	160452	297428	244165	224802	184710
ydfg	b1539	[r]	27.249	248		1883.73	1754.03	1559.03	1504.21	1997.15	1914.03	1715.6	1515.92	1532.98	1870.89	1890.48	1819.18	1626.91	1630.74	1490.33	1224.29	1166.15	2094.36	1742.92	1619.24	1396.78	1242.09	1161.03	467164	434998	386640	373045	495294	474681	425469	375947	380179	463981	468838	451157	403473	404423	369602	303623	289205	519402	432245	401572	346403
gnsb	b1550		6.5476	57		5863.01	11048.6	5020.06	5276.73	6138.32	7850.33	6682.02	4944.39	5463.16	7399.92	7314.6	7121.68	7102.3	5080.81		3005.92		3966.83	5707.04	5219.43	4551.05	3938.43	3505.32	334192	629770	286143	300774	349884	447469	380875	281830	311400	421796	416932	405936	404831	289606		171338		226109	325301	297508	259410
relb	b1564	[l]	9.0714	79
flxa	b1566		12.208	110
dica	b1570	[k]	15.656	135
ynfb	b1583		12.909	113		257.711	202.86	185.931	186.166	243.354	261.358	217.364	193.162	179.255	240.188	261.073	212.994		172.412	161.018	182.991	88.7427	249.222	198.145		175.419	152.168	162.259	29121.3	22923.2	21010.2	21036.7	27499.1	29533.5	24562.2	21827.3	20255.8	27141.3	29501.2	24068.4		19482.5	18195	20677.9	10027.9	28162.1	22390.3		19822.3
speg	b1584	[j]	21.887	186		306.987	369.445	312.271	369.187	305.406	350.212	340.728	358.642	409.196	257.927		303.823		414.785	350.458	338.66			301.22	301.549	305.648	316.279	367.607	57099.6	68716.8	58082.5	68668.7	56805.5	65139.4	63375.5	66707.4	76110.5	47974.3		56511		77150	65185.3	62990.8			56026.9	56088.1	56850.5
pntb	b1602	[c]	48.722	462		1217.02	1291.74	1505.56	1966.62	1259.6	1315.73	1478.28	1768.45	2026.28	996.881	1026.74	1086.89	1055.42	1080.77	992.265	1020.97	915.321	1199.28	1099.62	1088.63	1066.21	941.467	973.82	562265	596786	695567	908577	581937	607869	682965	817024	936139	460559	474356	502142	487604	499317	458427	471687	422878	554065	508025	502948	492588
pnta	b1603	[c]	54.623	510		1429.52	1580.45	1796.57	2347.55	1496.67	1488.65	1606.2	2069.49	2290.85	1077.03	1115.3	1189.03	1245.9	1215.34	1130.22	1212.75	1075	1180.46	1281.54	1284.04	1262.7	1177.46	1176.79	729057	806029	916249	1.19725e+06	763302	759213	819162	1.05544e+06	1.16833e+06	549283	568802	606406	635411	619824	576410	618502	548252	602033	653585	654862	643979
ydgh	b1604		33.903	314		2351.93	2276.94	2140.42	2052.59	2373.05	2336.74	2088.02	1906.28	1947.38	2529.86	2469.54	2219.27	2294.02	2003.86	1784.43	1596.37	638.735	2338.23	2209.44	1955.76	1823.21	2370.53	1478.21	738506	714959	672093	644515	745137	733736	655638	598573	611476	794377	775435	696849	720321	629212	560312	501260	200563	734206	693765	614109	572489
rsta	b1608	[tk]	26.704	239						27.3807																							6543.99
fumc	b1611	[c]	50.488	467		3293.68	2432.56	1363.53	596.059	3314.49	3138.96	1766.73	977.955	631.129	3738.47	3354.55	2837.8	1980.84	1587.33	1038.35	765.072	470.234	4115.55	2138.14	1777.97	1165.22	799.871	546.292	1.53815e+06	1.13601e+06	636767	278359	1.54787e+06	1.4659e+06	825064	456705	294737	1.74587e+06	1.56657e+06	1.32525e+06	925052	741282	484909	357288	219599	1.92196e+06	998510	830313	544157
fuma	b1612	[c]	60.298	548		7044.78	8172.3	7389.45	4367.02	7018.95	7889.83	8515.75	6240	4254.82	6069.66	6800.95	8907.68	10035.6	9861.63	8387.86	6778.94	3983.28	5536.52	9786.85	11112.6	9858.22	7739.32	5893.05	3.86054e+06	4.47842e+06	4.04942e+06	2.39313e+06	3.84639e+06	4.32363e+06	4.66663e+06	3.41952e+06	2.33164e+06	3.32617e+06	3.72692e+06	4.88141e+06	5.49952e+06	5.40417e+06	4.59655e+06	3.71486e+06	2.18284e+06	3.03401e+06	5.3632e+06	6.08968e+06	5.4023e+06
mana	b1613		42.849	391		1170.93	1114.39	1015.91	976.443	1171.05	1137.02	1115.97	1019.3	995.702	1271.72	1373.93	1257.66	1259.75	1180.65	1100.38	1097.12	839.265	1301.61	1251.52	1214.72	1097.98	1101.11	1023.47	457835	435728	397222	381789	457879	444576	436343	398547	389320	497244	537208	491746	492563	461635	430248	428973	328153	508930	489344	474957	429312
ydga	b1614	[s]	54.688	502		1243.08	1192.67	1207.95	1222.29	1186.66	1119.4	1161.74	1240.18	1223.19	1196.06	1197.95	1272.54	1310.87	1261.63	1186.45	1105.54	1078.94	1390.82	1303.5	1244.75	1224.57	1066.4	1157.92	624027	598722	606393	613588	595706	561939	583194	622572	614039	600423	601369	638815	658058	633340	595599	554981	541628	698189	654359	624865	614733
uidc	b1615		46.647	421											60.2644																							25371.3
hdha	b1619	[iqr]	26.778	255		1371.48	927.858	721.735	550.731	1245.93	1103.16	747.307	717.58	690.433	1368.16	1099.08	827.167	577.394	380.856	309.466	291.815	319.148	1686.75	733.965	531.617	373.035	295.866	297.536	349727	236604	184042	140436	317711	281305	190563	182983	176060	348881	280264	210928	147235	97118.4	78913.9	74412.7	81382.7	430120	187161	135562	95123.8
add	b1623	[f]	36.397	333
gsta	b1635		22.868	201		1750.88	1556.89	1321.97	1108.32	1735.02	1693.26	1371.15	1134.09	1010.17	1576.7	1624.64	1424.54	1034.58	832.822	781.902		581.812	1872.38	1184.43	915.401	742.362	576.801	577.05	351928	312935	265717	222772	348740	340345	275601	227952	203045	316917	326553	286332	207951	167397	157162		116944	376348	238071	183996	149215
pdxy	b1636	[h]	31.322	287
tyrs	b1637	[j]	47.526	424		839.427	891.067	920.888	1030.41	825.145	845.181	904.43	987.629	1107.17	689.147	714.172	730.617	826.824	876.223	880.633	963.804	1089.64	720.388	774.57	794.53	896.036	909.01	1046.18	355917	377812	390456	436892	349862	358357	383478	418755	469440	292198	302809	309782	350573	371519	373389	408653	462008	305445	328418	336881	379919
pdxh	b1638	[h]	25.545	218		468.675	421.378	400.137	397.641	457.23	452.844	414.303	397.9	383.353	432.494	456.088	458.448	432.629	408.362	379.873	364.705	378.27	419.95	357.79	383.109	358.262	353.595	335.396	102171	91860.4	87229.9	86685.7	99676.1	98720.1	90318	86742.2	83570.9	94283.6	99427.2	99941.7	94313	89023	82812.3	79505.7	82462.8	91549.1	77998.2	83517.8	78101.1
slyb	b1641		15.601	155		5531.04	4927.65	4370.82	3814.4	5350.15	4881	4465.58	4435.06	4168.18	5899.55	5465.3	5315.27	4830.8	4358.14	4204.73	4026.73	4211.66	6260.62	4612.05	4407.92	4154.87	3959.9	3858.86	857312	763786	677476	591232	829273	756556	692165	687434	646068	914431	847121	823867	748774	675512	651733	624143	652808	970396	714867	683227	644005
slya	b1642	[k]	16.353	144		1186.13	1253.3	1123.86	880.942	1157.88	1366.36	1088.17	1052.51	1009.22	1195.05	1134.26	1195.1	1135.94	901.939	996.06	747.97		1138.14	1084.76	982.6	906.658	793.309	759.097	170803	180475	161836	126856	166734	196755	156696	151561	145327	172087	163333	172094	163575	129879	143433	107708		163892	156206	141494	130559
ydhf	b1647		33.675	298		462.749	345.727	230.1		426.934	364.244	266.626	196.407	172.016	569.727	531.752	384.143	266.388	156.955	170.359	139.074	113.792	644.374	326.565	240.738	188.691	140.45	127.343	137899	103027	68569.7		127226	108545	79454.6	58529.2	51260.7	169779	158462	114474	79383.5	46772.4	50767.1	41444	33910.1	192023	97316.3	71740	56229.8
nema	b1650	[c]	39.516	365											116.922								236.487	249.969														42676.5								86317.6	91238.6
gloa	b1651	[e]	14.92	135		480.478	482.067	444.898	357.144	471.671	422.607	480.908	402.149	360.268	401.431	407.889	501.024	410.138	357.181	304.388	285.94	261.343	503.367	366.07	331.806	315.633	320.311	250.613	64864.6	65079.1	60061.2	48214.5	63675.6	57052	64922.6	54290.1	48636.1	54193.2	55065	67638.2	55368.7	48219.5	41092.3	38601.9	35281.3	67954.5	49419.5	44793.8	42610.5
rnt	b1652	[l]	23.522	215													304.183																							65399.4
grxd	b1654		12.879	115		3535.02	3595.35	3578.24	3944.04	3603.52	3497.6	3556.46	3758.81	4050.52	2824.68	2879.57	3080.75	3159.16	3097.51	3088.66	3248.41	2358.58	2672.04	2987.42	3039.71	2971.75	3105.19	3056.33	406527	413465	411497	453565	414404	402223	408993	432263	465810	324838	331151	354286	363303	356214	355196	373567	271237	307284	343554	349566	341751
sodb	b1656	[p]	21.265	193		7357.41	8259.83	8481.82	7910.32	7560.15	8130.19	8917.37	8656.56	8341.88	7858.66	8028.4	9492.12	9739.75	10507.2	10077.3	9677.01	7569.9	7084.28	9943.53	10650.6	11361.4	9913.89	12934.1	1.41998e+06	1.59415e+06	1.63699e+06	1.52669e+06	1.45911e+06	1.56913e+06	1.72105e+06	1.67072e+06	1.60998e+06	1.51672e+06	1.54948e+06	1.83198e+06	1.87977e+06	2.02788e+06	1.94492e+06	1.86766e+06	1.46099e+06	1.36727e+06	1.9191e+06	2.05557e+06	2.19276e+06
purr	b1658	[k]	38.174	341		805.179	781.359	691.636	674.74	794.606	776.258	735.585	650.932	680.663	856.908	913.93	907.395	859.32	818.874	793.42	754.273	823.269	887.124	884.052	924.408	858.81	725.031	850.377	274566	266443	235848	230086	270961	264704	250835	221968	232106	292206	311650	309422	293028	279236	270556	257207	280735	302509	301462	315223	292854
cfa	b1661	[m]	43.909	382																			118.157																							45135.8
ribc	b1662	[h]	23.445	213		457.718	496.644	601.697	563.217	455.272	459.23	530.584	612.695	584.529	361.203	409.461	468.067	432.323	482.056	501.022	448.692	523.201	415.553	432.006	455.267	437.622	484.143	504.373	97493.8	105785	128161	119965	96973	97815.9	113014	130504	124505	76936.2	87215.3	99698.3	92084.9	102678	106718	95571.5	111442	88512.8	92017.4	96971.9	93213.5
ydhq	b1664	[mu]	42.876	418		70.4264	70.5475	89.3014	93.2296	64.0132	62.2637	91.6024	93.977	83.8968	83.0798	57.666		64.9827	77.6418		79.442			97.4323	78.3308	86.4934	83.2609	92.3499	29438.2	29488.8	37328	38970	26757.5	26026.2	38289.8	39282.4	35068.9	34727.3	24104.4		27162.8	32454.3		33206.8			40726.7	32742.3	36154.3
ydhr	b1667		11.288	101		3282.12	2567.1	2104.86	1648.04	3594.35	3375.75	2436.34	1914.74	1680.73	3472.98	3690.93	2668.22	1927.3	1513.26	1023.23	1025.29	663.082	3609.84	2209.44	1624.85	1189.2	1133.66	854.855	331494	259277	212591	166452	363030	340951	246070	193389	169754	350771	372784	269490	194657	152839	103347	103555	66971.3	364594	223154	164110	120109
pykf	b1676	[g]	50.729	470		6198.09	5843.58	6645.25	7040.14	6575.89	5883.09	6386.97	7201.82	7441.36	6642.57	6196.44	5040.47	4921.04	4905.92	5442.01	5821.26	6626.48	6892.8	4505.01	4674.25	4922.79	5647.29	5901.77	2.9131e+06	2.74648e+06	3.12327e+06	3.30887e+06	3.09067e+06	2.76505e+06	3.00188e+06	3.38486e+06	3.49744e+06	3.12201e+06	2.91233e+06	2.36902e+06	2.31289e+06	2.30578e+06	2.55775e+06	2.73599e+06	3.11445e+06	3.23962e+06	2.11735e+06	2.1969e+06	2.31371e+06
lpp	b1677	[m]	8.3234	78		206732	224331	224657	223065	200630	206314	222987	226555	231841	146210	160180	165424	184315	183420	170402	202952	208961	188803	186475	199025	186413	186638	198982	1.61251e+07	1.74978e+07	1.75233e+07	1.73991e+07	1.56491e+07	1.60925e+07	1.7393e+07	1.76713e+07	1.80836e+07	1.14044e+07	1.24941e+07	1.29031e+07	1.43765e+07	1.43067e+07	1.32914e+07	1.58303e+07	1.6299e+07	1.47266e+07	1.4545e+07	1.5524e+07	1.45402e+07
ynhg	b1678	[s]	36.082	334		84.9379	107.702	125.326	163.438	94.8324	102.77	156.15	127.138	121.351	80.1701		104.947	59.8794			56.1691	164.267		121.826	73.5396	106.158	145.002	149.805	28369.3	35972.3	41859	54588.2	31674	34325	52154.2	42464.1	40531.2	26776.8		35052.2	19999.7			18760.5	54865.2		40690	24562.2	35456.6
sufs	b1680	[e]	44.433	406		58.1852		39.0873			60.3423	44.4202	37.3095		55.8079									36.6383			12.5172		23623.2		15869.4			24499	18034.6	15147.6		22658									14875.1
sufc	b1682	[o]	27.582	248		162.018			101.415						109.174									106.316			51.4903		40180.4			25150.9						27075.1									26366.3
sufb	b1683	[o]	54.745	495		12.1625	11.4648	8.90691	7.68804	11.4954	9.25806		9.71531		14.0815											5.14997	5.43802	2.70727	6020.44	5675.07	4408.92	3805.58	5690.24	4582.74		4809.08		6970.34											2549.23
ydii	b1686	[q]	14.945	136			369.216	329.915	168.824	244.51		347.534	136.506		312.145				165.356					295.938		272.218	298.952	292.697		50213.3	44868.4	22960	33253.3		47264.6	18564.8		42451.7				22488.5					40247.5		37021.7
ydij	b1687	[c]	113.25	1018		214.093	208.651	199.952	209.663	210.176	214.123	211.938	233.222	220.303	205.524	208.661	224.926	235.28	213.162	211.291	233.245	214.847	212.796	218.756	223.977	222.505	218.125	226.728	217947	212407	203551	213437	213959	217977	215753	237420	224268	209223	212417	228974	239515	216999	215094	237443	218714	216626	222694	228009	226510
ydik	b1688	[r]	39.841	370
arod	b1693	[e]	27.466	252		321.624	309.577	263.525	219.065	334.824	329.981	292.645	224.059	236.798	290.238	381.797	246.373	291.599	205.971	218.881	117.562	122.276	309.721	227.079	182.885	172.163	148.485	141.87	81049.3	78013.4	66408.3	55204.3	84375.7	83155.2	73746.6	56462.8	59673.2	73139.9	96212.9	62086	73483	51904.6	55157.9	29625.6	30813.6	78049.8	57224	46087.1	43385.2
ppsa	b1702		87.434	792		2367.93	2077.42	1266.28	998.746	2333.75	2234.59	1458.47	947.854	839.933	2147	2217.44	2155.51	1972.64	1607.59	1366.05	1155.86	1157.08	2167.42	2060.85	1753.4	1418.66	1179	1064.35	1.8754e+06	1.64532e+06	1.0029e+06	791007	1.84833e+06	1.76979e+06	1.15511e+06	750700	665227	1.70042e+06	1.75621e+06	1.70716e+06	1.56233e+06	1.27321e+06	1.08191e+06	915441	916410	1.7166e+06	1.63219e+06	1.38869e+06	1.12358e+06
ppsr	b1703		31.211	277							130.116		103.761	87.6734									79.1266											36042.2		28741.7	24285.5									21918.1
aroh	b1704	[e]	38.735	348		126.429	133.779	147.595	208.313	97.6021	138.374	215.303	141.919	199.069	74.3089		119.624		162.611		196.951	215.406	278.461	75.7089	109.389	114.85	100.636	110.119	43997.3	46555.2	51363	72493.1	33965.5	48154.1	74925.4	49387.7	69275.8	25859.5		41629.2		56588.6		68538.8	74961.2	96904.5	26346.7	38067.4	39967.8
btue	b1710	[o]	20.469	183		1771.38	1432.53	1230.65	982.951	1762.26	1603.24	1419.35	1120.56	1022.79	1587.06	1498.59	1292.87	949.47	577.313	722.42	512.302		1383.79	1094.24	865.494	680.411	560.228	435.889	324163	262152	225208	179880	322494	293393	259741	205063	187171	290432	274242	236596	173753	105648	132203	93751.3		253233	200246	158385	124515
ihfa	b1712	[l]	11.354	99		13779.5	11639.6	10414.3	8717.17	13735.6	12014.9	10835.3	9052.25	8548.07	15213.2	12667.5	10539.3	8606.76	6901.39	5815.46	5213.05	4734.69	13835.3	9445.88	7581.25	6823.02	6145.62	6116.65	1.36417e+06	1.15232e+06	1.03102e+06	862999	1.35982e+06	1.18948e+06	1.0727e+06	896173	846259	1.5061e+06	1.25408e+06	1.04339e+06	852070	683237	575730	516092	468734	1.3697e+06	935142	750544	675479
phet	b1713	[r]	87.377	795		3402.28	3298.5	2848.42	2761.27	3459.11	3474.22	3021	2859.65	2760.62	2900.4	3056.56	3121.44	3002.03	2868.43	2438.44	2641.18	2734.08	2870.48	2981.1	2889.99	2587.07	2652.24	2594.23	2.70482e+06	2.62231e+06	2.2645e+06	2.19521e+06	2.75e+06	2.762e+06	2.40169e+06	2.27342e+06	2.19469e+06	2.30581e+06	2.42997e+06	2.48155e+06	2.38661e+06	2.2804e+06	1.93856e+06	2.09974e+06	2.17359e+06	2.28203e+06	2.36997e+06	2.29754e+06	2.05672e+06
phes	b1714	[j]	36.831	327		4238.39	3955.13	3347.54	3205.82	4228.61	4199.37	3751.03	3382.05	3280.64	3520.55	3627.21	3740.37	3507.04	3293.55	3185.81	3121.64	3213.05	3389.8	3525.6	3428.61	3186.97	3113.39	3078.89	1.38595e+06	1.29333e+06	1.09464e+06	1.0483e+06	1.38276e+06	1.37319e+06	1.22659e+06	1.10593e+06	1.07277e+06	1.15122e+06	1.1861e+06	1.2231e+06	1.1468e+06	1.07699e+06	1.04176e+06	1.02078e+06	1.05067e+06	1.10846e+06	1.15287e+06	1.12115e+06	1.04214e+06
rplt	b1716	[j]	13.497	118		9995.21	11854.7	13945.7	15758.1	9937.56	11161.4	13019.5	15030.9	16321.9	9862.35	10207.7	12313.2	14729.1	16092.2	18797.6	19033.3	20031.6	9754.74	13960.4	16229.9	17796.7	18343.9	19693.3	1.17944e+06	1.39886e+06	1.64559e+06	1.85945e+06	1.17263e+06	1.31704e+06	1.53631e+06	1.77364e+06	1.92598e+06	1.16376e+06	1.2045e+06	1.45296e+06	1.73803e+06	1.89888e+06	2.21811e+06	2.24593e+06	2.36373e+06	1.15106e+06	1.64733e+06	1.91513e+06	2.10001e+06
rpmi	b1717		7.2888	65		142.307	172.492																	189.86	246.415			313.243	9249.96	11212																	12340.9	16017
infc	b1718	[j]	20.564	180		3623.4	3915.57	4227.75	4522.74	3577.72	3570.94	3937.43	4295.25	4479.99	3522.46	3353.02	3561.87	3808.62	3897.41	4272.89	4431.51	4376.7	3550.81	3770.7	4024.11	4244.39	4620.71	4709.56	652213	704803	760995	814093	643989	642769	708738	773146	806399	634042	603543	641137	685551	701534	769120	797671	787806	639146	678727	724340	763990
thrs	b1719	[j]	74.013	642		1083.28	1169.85	1107.77	1078.25	1096.83	1166.93	1181.9	1100.34	1120.16	1115.23	1172.18	1247.01	1259.7	1222.32	1237.75	1241.8	1275.75	1126.31	1192.12	1269.04	1172.27	1158.11	1205.77	695465	751044	711185	692238	704166	749170	758777	706420	719142	715978	752541	800582	808726	784728	794635	797237	819034	723089	765343	814726	752600
pfkb	b1723		32.456	309		472.322	438.709	405.922	352.997	453.857	454.975	402.276	390.87	395.141	439.925	319.108	301.753		211.481			145.121		334.298	254.239	194.206	138.788	206.181	145948	135561	125430	109076	140242	140587	124303	120779	122098	135937	98604.5	93241.6		65347.5			44842.4		103298	78559.8	60009.8
ynia	b1725	[g]	32.458	286		220.049				136.56	229.571				257.701	278.249							348.069	110.999					62934				39056.3	65657.4				73702.6	79579.1							99547.8	31745.9
ynic	b1727	[r]	24.33	222		366.438	387.252	353.712	332.142	368.854	339.361	338.401	332.831	340.834	280.407	309.343	314.159		323.293	361.571				367.189	345.135	364.347	372.426	349.627	81349.2	85969.9	78524	73735.4	81885.5	75338.2	75125	73888.4	75665.2	62250.4	68674.1	69743.4		71771.1	80268.7				81516	76620	80885.1
ydjn	b1729	[r]	48.661	463		1365.27	1560.04	1702.44	2501.35	1390.51	1552.74	1612.36	2028.05	2509.64	752.639	917.257	985.861	1144.16	1385.85	1558.21	1915.98	2182.69	787.546	1059.07	1205.37	1577.98	1613.99	1797.51	632120	722300	788229	1.15812e+06	643804	718919	746525	938988	1.16196e+06	348472	424690	456454	529748	641650	721453	887100	1.01059e+06	364634	490349	558088	730605
kate	b1732		84.162	753		913.021	741.311	541.668	439.332	926.544	815.327	575.445	470.733	375.787	1199.62	1011.51	751.95	580.908	355.243	177.333	156.612	130.933	797.106	685.996	483.367	246.065	163.779	127.328	687505	558207	407876	330817	697687	613941	433310	354462	282968	903318	761670	566218	437423	267498	133532	117929	98592.4	600221	516555	363975	185287
chbb	b1738	[g]	11.426	106		229.223	310.35	229.395	214.432	475.309	442.19	309.271	183.19	162.183	501.355	517.119	240.402	205.25	225.234	173.233			485.559	224.545	227.614	210.328	118.614	132.661	24297.7	32897.1	24315.8	22729.8	50382.8	46872.1	32782.8	19418.2	17191.4	53143.7	54814.7	25482.6	21756.5	23874.8	18362.7			51469.2	23801.8	24127.1	22294.8
osme	b1739		12.021	112		13177.6	11129.7	10659.8	7589.95	13983.5	10664.4	9812.92	9461.4	7842.63	13191.1	12539.6	9136.55	7981.01	5036.17	3533.71	3016.52	2523.54	14729.4	8022.39	6115.48	4206.17	3159.72	2775.62	1.47589e+06	1.24653e+06	1.1939e+06	850075	1.56615e+06	1.19441e+06	1.09905e+06	1.05968e+06	878375	1.4774e+06	1.40444e+06	1.02329e+06	893874	564051	395775	337850	282636	1.64969e+06	898507	684934	471092
nade	b1740	[h]	30.636	275		1307.64	1301.66	1311.92	1313.05	1334.74	1330.33	1209.19	1276.49	1313.72	1051.65	1069.91	829.932	789.609	685.245	668.282	678.669	746.118	1138.81	884.775	828.798	751.16	650.573	708.63	359601	357957	360779	361088	367052	365842	332527	351033	361272	289204	294227	228231	217143	188442	183778	186634	205183	313172	243313	227920	206569
spy	b1743	[untp]	18.199	161				112.398	73.4816	216.985	175.107	149.119		73.8818	327.287	161.407	238.452							207.302	151.052						18096.1	11830.5	34934.6	28192.2	24008.2		11895	52693.1	25986.6	38390.7							33375.7	24319.3
astc	b1748	[e]	43.665	406		465.835	262.061	69.681	57.517	396.333	285.339				1080.2	788.867							499.473	173.281	129.552				189129	106397	28290.5	23351.9	160911	115848				438560	320280							202786	70352.1	52598
xtha	b1749	[l]	30.969	268		336.954	316.851	283.421	276.468	321.731	323.563	311.26	298.294	299.286	353.89	386.64	358.603		378.859		255.8	245.922	401.812	358.72	324.408	334.474	294.241	306.847	90303.6	84916	75956.9	74093.5	86223.9	86714.8	83417.8	79942.7	80208.6	94842.5	103620	96105.6		101534		68554.4	65907	107686	96137.1	86941.3	89639.1
ynjb	b1754	[r]	42.844	388
ynje	b1757		48.228	435							11.4459																							4978.97
gdha	b1761	[e]	48.581	447		4054.46	4822.51	5217.53	5081.94	3948.24	4718.47	4913.86	5285.12	5204.13	1792.61	2106.71	2491.89	2661.25	2556.83	2066.61	1712.32	1146.7	1646.53	2109.11	2174.58	1927.01	1752.2	1166.77	1.81234e+06	2.15566e+06	2.33223e+06	2.27163e+06	1.76486e+06	2.10915e+06	2.1965e+06	2.36245e+06	2.32625e+06	801299	941701	1.11388e+06	1.18958e+06	1.1429e+06	923774	765409	512575	735999	942771	972038	861375
seld	b1764	[e]	36.687	347		812.653	734.004	663.922	582.085	766.331	765.748	650.92	653.483	586.944	871.457	773.417	809.269	704.532	588.419	605.794	521.227	600.288	855.65	724.905	654.028	671.564	551.205	569.814	281990	254699	230381	201983	265917	265715	225869	226759	203670	302396	268376	280816	244472	204181	210211	180866	208300	296910	251542	226948	233033
ydja	b1765	[c]	20.059	183		1517.68	1491.86	1459.47	1271.64	1492.7	1521.42	1398.53	1360.28	1249.13	1243.76	1363.66	1249.96	1308.27	1096.4	1037.47	942.812	850.485	1199.27	1194.83	1203.12	1058.33	944.582	905.19	277735	273010	267084	232710	273165	278419	255930	248932	228591	227608	249551	228743	239414	200641	189858	172535	155639	219466	218655	220170	193675
sppa	b1766	[ou]	67.219	618			19.8632	20.9127	22.6849	22.2699			21.3625	20.5991	15.7526		14.8627	16.8636		14.0035	21.851	18.5352	15.4925		14.5944			19.1854		12275.5	12924.1	14019.2	13762.8			13202	12730.3	9735.09		9185.17	10421.7		8654.16	13503.9	11454.7	9574.37		9019.37
ansa	b1767	[ej]	37.127	338		65.4658	76.13	63.3706	65.2258	74.5123		78.5355				89.5373								68.9218		63.4651	66.2681	60.2653	22127.5	25732	21419.3	22046.3	25185.1		26545				30263.6								23295.6		21451.2
pnca	b1768		23.362	213
ydjf	b1770		28.261	252
yeac	b1777		10.338	90
msrb	b1778		15.451	137		1611.22	1462.49	1009.9	753.572	1502.2	1553.51	1286.7	916.289	709.035	1655.85	1746.06	1522.49	1281.17	1110.97	824.833	639.537	351.908	1594.82	1485.55	1127.91	857.74	766.903	635.26	220737	200361	138357	103239	205802	212830	176278	125532	97137.8	226851	239210	208581	175521	152203	113002	87616.5	48211.5	218490	203521	154524	117510
gapa	b1779	[g]	35.532	331		31485	32003.3	35340.1	38124.1	30646.3	30784.8	33999.2	39099.3	41412.6	31390.6	32215.6	35974.8	37782.1	39828.8	40771.1	40828.9	42849.9	32145.1	35703.2	37949.9	39719.1	41729.8	40475.5	1.04215e+07	1.05931e+07	1.16976e+07	1.26191e+07	1.01439e+07	1.01898e+07	1.12537e+07	1.29419e+07	1.37076e+07	1.03903e+07	1.06634e+07	1.19077e+07	1.25059e+07	1.31833e+07	1.34952e+07	1.35144e+07	1.41833e+07	1.064e+07	1.18178e+07	1.25614e+07	1.3147e+07
yead	b1780		32.666	294		547.273	652.803	708.817	748.206	584.63	634.908	714.286	767.236	740.285	545.088	590.106	669.396	776.588	895.612	974.974	918.966	685.115	553.294	712.427	784.119	902.239	979.071	920.902	160898	191924	208392	219973	171881	186663	210000	225567	217644	160256	173491	196802	228317	263310	286642	270176	201424	162668	209453	230531	265258
mipa	b1782	[m]	27.831	248		1238.51	1384.01	1349.04	1636.71	1213.65	1335.19	1348.22	1610.12	1630.55	1215.73	1339.5	1575.26	1705.69	1832.69	1779.7	1901.12	1980.43	1405.99	1788.89	1869.12	1969.51	1872.21	1937	307152	343234	334562	405905	300986	331127	334357	399309	404377	301502	332196	390664	423012	454506	441366	471478	491145	348685	443646	463542	488440
yeag	b1783	[t]	74.479	644		612.756	427.753	390.118	239.781	576.746	474.781	370.191	299.863	239.287	606.641	519.047	334.252	207.953	105.759	66.4976	48.2324		688.351	251.855	148.635	80.8071	49.9014	52.7522	394615	275473	251236	154419	371424	305759	238403	193112	154101	390677	334266	215258	133922	68108.5	42824.4	31061.7		443298	162195	95720.8	52039.7
yeak	b1787	[s]	17.85	167				309.081		316.023	370.327	311.199	287.162	325.896	221.212						177.148		238.145		223.925	189.194					51616.6		52775.8	61844.6	51970.3	47956.1	54424.6	36942.3						29583.7		39770.2		37395.5	31595.4
fadd	b1805	[iq]	62.331	561		90.8845	90.1264			92.3702					80.088										53.7346				50986.2	50560.9			51819.7					44929.3										30145.1
yeay	b1806	[m]	20.921	193		63.3103		29.9269	25.1576		45.9869		23.2137		83.65	93.0413		35.8582			19.9975		93.9228			26.064		26.268	12218.9		5775.89	4855.42		8875.48		4480.24		16144.5	17957		6920.64			3859.52		18127.1			5030.34
yoab	b1809		12.493	114		1219.54	1151.7	1077.63	1076.17	1272.59	1314.92	1139.34	1066.72	1053.91	1225.65	1239.41	1302.35	1401.71	1054.62	1027.15	950.633	765.118	1072.33	1314.67	1097.06	1237.89	1034.47	989.593	139027	131294	122850	122683	145075	149901	129884	121606	120146	139724	141292	148468	159795	120227	117095	108372	87223.5	122245	149872	125065	141119
yoah	b1811		6.5542	59
sdaa	b1814	[e]	48.906	454
manx	b1817	[g]	35.047	323		17904.5	20925.6	18328.9	10535.8	19095.5	19701.4	21431.2	16595.6	11234.3	9647.37	11064.2	15335.3	14831.3	14617.7	13296.7	12474.7	7049.74	12412.9	16313.5	16123.9	13644.6	11931.7	9584.45	5.78314e+06	6.75896e+06	5.92024e+06	3.40308e+06	6.16786e+06	6.36355e+06	6.92227e+06	5.36039e+06	3.62867e+06	3.1161e+06	3.57375e+06	4.95329e+06	4.7905e+06	4.72152e+06	4.29484e+06	4.02933e+06	2.27706e+06	4.00936e+06	5.26926e+06	5.20803e+06	4.40721e+06
many	b1818	[g]	27.635	266		413.335																							109947
manz	b1819		30.955	283		2861.7	3166.93	2761.02	1724.78	3022.86	2610.39	3261.4	2221.37	1574.3	1505.91	1580.52	2032.11	2077.17	1782.48	1495.06	1408.56	853.801	1744.63	2344.01	2096.32	1876.43	1390.39	1239.82	809862	896241	781369	488113	855470	738742	922977	628648	445527	426173	447287	575087	587838	504441	423102	398621	241626	493730	663354	593258	531030
cspc	b1823	[k]	7.4023	69		35274.7	41456.8	40674.6	36487.1	34093.8	38240.1	43194.3	37899.6	35446.7	35726.8	38036.5	46673.9	50861.6	49974.7	49856.8	47332.9	34036.5	35935.1	50299.6	48448	57391.3	52167.2	48461	2.43395e+06	2.86052e+06	2.80655e+06	2.51761e+06	2.35247e+06	2.63856e+06	2.9804e+06	2.61507e+06	2.44582e+06	2.46515e+06	2.62452e+06	3.2205e+06	3.50945e+06	3.44825e+06	3.44012e+06	3.26597e+06	2.34852e+06	2.47952e+06	3.47068e+06	3.34291e+06	3.96e+06
yebo	b1825		10.792	95
kdgr	b1827	[k]	30.029	263		394.841	407.655	384.045	337.227	454.715	452.563	392.599	322.893	325.53	414.548	423.862	394.401	399.229	301.931	332.158	286.982	299.361	548.791	383.16	353.945	311.302	301.982	296.482	103843	107213	101004	88690.7	119590	119024	103254	84920.9	85614.3	109026	111476	103727	104997	79407.8	87357.5	75476.2	78732	144332	100771	93087.5	81872.6
htpx	b1829	[o]	31.923	293		367.569	321.034	325.819	274.66	97.0027	321.117	369.651		265.789	353.313		383.598							433.794	355.945	338.42	311.889	324.745	107698	94062.9	95465.1	80475.4	28421.8	94087.3	108308		77876.1	103521		112394							127102	104292	99157.1
prc	b1830	[m]	76.662	682		283.243	292.699	290.933	283.514	288.285	276.425	292.185	290.339	267.757	275.195	266.556	276.404	263.137	264.587	247.691	246.972	239.216	336.188	280.724	257.4	263.81	265.041	255.225	193172	199621	198417	193357	196611	188522	199270	198011	182610	187683	181791	188508	179459	180449	168926	168435	163145	229281	191454	175547	179918
proq	b1831		25.892	232		816.172	993.863	1038.1	1180.04	842.938	922.401	1031.18	1107.42	1184.58	754.852	837.035	932.696	1075.28	1020.14	1106.57	1104.25	1192.91	831.156	952.691	1120.42	1103.74	1188.45	1270.73	189352	230576	240839	273768	195562	213997	239234	256921	274823	175126	194192	216385	249466	236672	256724	256185	276755	192828	221024	259938	256067
msrc	b1832		18.121	165		406.577	422.429	399.825	406.806	401.062	389.882	370.042	377.105	408.016	314.477	356.652	389.064	329.768	409.073	335.255	306.046	230.184	385.169	342.388	336.407	306.169	295.363	270.651	67085.2	69700.8	65971.2	67123	66175.2	64330.6	61056.9	62222.3	67322.6	51888.7	58847.5	64195.6	54411.7	67497	55317.1	50497.6	37980.4	63552.9	56493.9	55507.2	50518
yebe	b1846	[s]	23.687	219
yebf	b1847		12.962	118		435.251	224.705	213.014	218.786	334.871	367.568	252.953	190.099	166.535	507.98									459.611	284.854	271.448	189.893	86.2179	51359.7	26515.2	25135.7	25816.7	39514.8	43373	29848.5	22431.6	19651.1	59941.6									54234.2	33612.8	32030.8
purt	b1849	[f]	42.433	392		391.169	428.294	520.407	652.314	369.803	439.197	453.846	596.074	681.959	442.211	482.059	530.001	550.696	595.23	606.936	664.875	819.045	504.452	505.053	544.725	578.577	637.551	706.433	153338	167891	204000	255707	144963	172165	177907	233661	267328	173347	188967	207760	215873	233330	237919	260631	321066	197745	197981	213532	226802
eda	b1850	[g]	22.284	213		2668.97	2565.84	2416.34	2590.32	2614.77	2531.6	2428.22	2624.56	2599.51	2467.93	2454.76	2452.06	2388.97	2114.58	2176.3	2147.25	2310.22	2451.21	2296.52	2329.8	2071.1	2072.19	2094.06	568490	546523	514681	551739	556947	539231	517211	559031	553697	525670	522864	522290	508850	450405	463553	457365	492077	522108	489159	496247	441145
zwf	b1852	[g]	55.704	491		1235.16	1163.65	1134.36	1082.18	1282.56	1225.71	1182.6	1134.25	1107.12	1182.73	1176.52	1081.93	1060.97	874.739	845.505	833.761	965.259	1399.75	1021.08	953.77	865.938	795.575	856.048	606466	571350	556970	531351	629736	601826	580658	556916	543594	580719	577673	531229	520937	429497	415143	409377	473942	687280	501349	468301	425176
yebk	b1853	[k]	31.975	289																				101.393																							29302.6
pyka	b1854	[g]	51.357	480		3441.16	3393.39	2969.34	2334.05	3561.72	3498.51	3208.85	2711.85	2337.22	3049.57	3122.54	3020.04	3111.59	2899.97	2549.37	2277.15	2204.79	3331.43	3192.15	3091.56	2671.99	2473.59	2267.79	1.65176e+06	1.62883e+06	1.42528e+06	1.12035e+06	1.70963e+06	1.67928e+06	1.54025e+06	1.30169e+06	1.12187e+06	1.46379e+06	1.49882e+06	1.44962e+06	1.49356e+06	1.39198e+06	1.2237e+06	1.09303e+06	1.0583e+06	1.59909e+06	1.53223e+06	1.48395e+06	1.28255e+06
lpxm	b1855		37.41	323				53.5829																		28.1899					17307.3																		9105.33
znua	b1857		33.777	310		22.9927	26.6462	32.0831	32.4539	23.2697	19.9787	30.5422	29.427	49.9729	29.8628			36.652	55.2512	51.1455	46.3466			43.3506	89.1809	50.6417	84.6653	43.9894	7127.73	8260.31	9945.75	10060.7	7213.6	6193.39	9468.07	9122.38	15491.6	9257.48			11362.1	17127.9	15855.1	14367.4			13438.7	27646.1	15698.9
ruva	b1861	[l]	22.085	203
yebc	b1864	[s]	26.422	246		2139.13	2260.67	2221.56	2215.27	2130.09	2221.47	2193.44	2182.9	2134.92	1845.21	2031.58	2045.13	2162.93	2340.18	2303.36	2193.91	1550.99	1764.29	2249.72	2181.49	2187.24	2396.43	2268.22	526226	556126	546504	544956	524003	546482	539587	536993	525190	453922	499768	503101	532081	575684	566626	539703	381544	434014	553432	536645	538061
asps	b1866	[j]	65.913	590		1501.62	1576.06	1463.7	1559.05	1551.09	1559.73	1520.92	1539.99	1607.18	1392.79	1410.71	1436.9	1599.02	1580.51	1550.08	1528.65	1717.79	1374.4	1521.32	1647.95	1552.99	1563.06	1620.67	885955	929873	863583	919838	915144	920243	897340	908595	948239	821749	832320	847772	943422	932503	914546	901903	1.01349e+06	810893	897577	972292	916262
yecd	b1867	[q]	20.452	188																				72.6797																							13663.8
cmoa	b1870		27.776	247		85.0169			106.127	103.106		117.32	115.13		95.4993	111.644					102.266			97.3783	98.2361	100.017	88.7631		20999.2			26213.3	25467.1		28978	28437.1		23588.3	27576.1					25259.6			24052.4	24264.3	24704.1
cmob	b1871		37.006	323							31.8562																							10289.5
yecm	b1875		21.205	188			30.3305				32.538																			5702.13				6117.15
args	b1876	[j]	64.682	577		412.311	415.783	436.18	458.535	416.397	419.149	488.431	455.125	471.747	451.335	495.804	432.376	434.788	531.726	491.256	459.539	538.185	548.431	475.348	502.083	475.677	478.246	527.907	237903	239907	251676	264574	240261	241849	281825	262607	272198	260420	286079	249481	250873	306806	283455	265154	310533	316445	274276	289702	274466
yect	b1877		18.885	162		1234.99		1219.63	1241.18	1299.44	1268.56	1266.95	1270.7	1256.92	1581.88		1718.05		2072.57		2130.88	1611.79		1624.91	1906.07	1570.42	2183.78	1850.81	200068		197580	201071	210509	205506	205246	205853	203621	256265		278325		335757		345202	261110		263236	308783	254408
chez	b1881	[nt]	23.976	214		65.46	84.9719	102.723	26.5136	68.8515	155.374	81.1613	98.617	108.035	67.0147	127.869	161.565	166.885	195.853	175.414		133.236		146.721	149.488	129.939	154.15	70.4356	14008.4	18184	21982.6	5673.91	14734.2	33250	17368.5	21104	23119.4	14341.1	27363.9	34574.9	35713.4	41912.5	37538.6		28512.5		31398.2	31990.5	27807
chey	b1882	[t]	14.097	129		223.254	170.385	117.346	167.421	134.553	252.811	275.235	179.708	214.538	231.445	427.577	500.555	527.468	514.595	568.771	420.378	267.904	390.598	434.983	384.169	339.699	370.783	176.685	28799.7	21979.7	15137.6	21597.3	17357.4	32612.7	35505.3	23182.3	27675.4	29856.4	55157.4	64571.6	68043.3	66382.8	73371.4	54228.8	34559.7	50387.2	56112.8	49557.8	43821.1
tap	b1885	[nt]	57.511	533				6.25135	5.00059	14.6187	16.5364	15.5447	5.24384	4.79798	6.45533	17.5173	18.1738	17.996			14.5086	13.0157		17.5401	24.9625	12.3794	13.6992	8.13648			3331.97	2665.31	7791.78	8813.89	8285.33	2794.97	2557.32	3440.69	9336.71	9686.63	9591.86			7733.09	6937.38		9348.85	13305	6598.22
tar	b1886	[nt]	59.943	553		101.659	146.079	123.537	158.962	133.129	118.04	171.066	143.342	175.395	197.158	282.17	494.672	523.79	500.928	432.684	432.454	394.544	318.695	389.468	336.982	318.843	399.025	228.083	56217.2	80781.8	68316	87905.7	73620.3	65276.4	94599.6	79267.9	96993.2	109029	156040	273553	289656	277013	239274	239147	218183	176238	215376	186351	176320
chew	b1887	[nt]	18.084	167		144.062	88.3449	213.951	254.547	77.0484	122.764	82.4574	121.414	319.798	123.292		404.973	470.104	446.394	437.441	369.267	279.463	184.059	367.697	339.254	309.343	403.937	198.644	24058.4	14753.6	35729.9	42509.4	12867.1	20501.6	13770.4	20276.1	53406.3	20589.8		67630.5	78507.4	74547.8	73052.7	61667.6	46670.3	30737.9	61405.4	56655.4	51660.3
chea	b1888	[nt]	71.382	654		64.9024	61.8402	83.418	110.407	100.184	46.0475	45.2128	88.8865	98.582	52.5571	101.383	163.246	191.488	202.737	189.263	143.348	148.521	138.91	145.555	145.739	119.833	149.152	86.8957	42446.2	40443.5	54555.4	72206.1	65520.4	30115	29569.2	58131.8	64472.6	34372.4	66304.2	106763	125233	132590	123778	93749.6	97133	90847.2	95192.9	95313.4	78371
motb	b1889	[n]	34.186	308			271.511	145.448																141.272	124.451	157.633	202.046	174.412		83625.5	44797.9																43511.7	38330.8	48550.9
mota	b1890	[n]	32.011	295								44.8964																							13244.4
flhc	b1891		21.566	192
otsa	b1896	[g]	53.61	474		119.164	93.2884	100.312	71.5042	162.202	178.624		92.9303		172.056								63.4736	68.1729	54.3553	38.502		21.495	56483.6	44218.7	47547.8	33893	76883.7	84668		44049		81554.5								30086.5	32313.9	25764.4	18249.9
araf	b1901	[g]	35.54	329		626.691				609.85	202.211				606.74	834.724													206181				200641	66527.5				199618	274624
ftna	b1905		19.424	165		882.735	957.035	981.597	1004.39	949.407	947.54	992.719	995.931	982.901	764.088	862.135	717.328	747.958	835.847	905.585	968.828	1029.97	836.857	843.306	897.477	1180.51	904.737	2355.3	145651	157911	161963	165724	156652	156344	163799	164329	162179	126075	142252	118359	123413	137915	149422	159857	169944	138081	139145	148084	194785
yeca	b1908	[r]	25.039	221		153.943	147.49	172.316		154.848	147.452	150.877	122.621	122.912	151.519		127.396		80.6617	94.811		75.5417	150.261	115.279	113.996	98.9711	88.0974	82.1833	34021.4	32595.2	38081.8		34221.4	32586.8	33343.8	27099.1	27163.5	33485.7		28154.5		17826.2	20953.2		16694.7	33207.6	25476.6	25193.2	21872.6
uvry	b1914	[tk]	23.892	218
yecf	b1915		8.2385	74
yecc	b1917	[e]	27.677	250		139.525	109.43	119.953	97.9883	106.114	110.241	115.298	127.223	118.495	82.0486	93.9124		102.542			70.9383		102.808	78.4099	119.32	80.2809	79.7399	79.8629	34881.3	27357.5	29988.3	24497.1	26528.4	27560.2	28824.5	31805.7	29623.7	20512.2	23478.1		25635.6			17734.6		25702.1	19602.5	29830	20070.2
yecs	b1918	[e]	24.801	222		158.068	153.671	168.633	153.521	150.904	143.501	154.485	184.764	185.478	129.287	128.017	137.122	130.315	117.935	130.364		90.828	122.142	121.201	141.654	124.425	109.852	108.183	35091.2	34115	37436.6	34081.7	33500.7	31857.3	34295.7	41017.7	41176.1	28701.7	28419.8	30441.2	28929.8	26181.6	28940.9		20163.8	27115.5	26906.6	31447.1	27622.4
dcyd	b1919		35.153	328		568.524	496.484	450.382	379.633	514.361	537.549	497.591	392.821	426.371	492.121	483.713	465.06	457.475	366.581	324.747	293.816	280.655	544.112	411.755	369.89	339.985	319.198	273.762	186476	162847	147725	124520	168710	176316	163210	128845	139850	161416	158658	152540	150052	120238	106517	96371.5	92054.7	178469	135056	121324	111515
fliy	b1920	[et]	29.039	266		7614.06	8141.2	6751.23	7194.4	6562.67	7622.05	7599.21	6668.6	6679.66	5772.39	4977.11	4259.14	5726.61	4261.39	4298.82	3588.4	702.641	4949.45	5136.96	4560.62	4207.94	6852.91	3290.52	2.02534e+06	2.16556e+06	1.79583e+06	1.91371e+06	1.74567e+06	2.02747e+06	2.02139e+06	1.77385e+06	1.77679e+06	1.53546e+06	1.32391e+06	1.13293e+06	1.52328e+06	1.13353e+06	1.14349e+06	954513	186903	1.31655e+06	1.36643e+06	1.21312e+06	1.11931e+06
flic	b1923	[n]	51.294	498		419.358	509.849	323.611	452.747	321.333	488.523	343.228	707.744	578.202	631.781	1041.24	1505.62	2315.39	2001.9	1781.99	1879.1	1695.88	1029.83	1530.25	1503.68	1424.92	1956.46	768.499	208840	253905	161158	225468	160024	243285	170928	352456	287945	314627	518539	749797	1.15306e+06	996944	887433	935790	844549	512856	762066	748833	709608
amya	b1927	[g]	56.639	495		106.272	115.315	66.9159	81.6328			89.2146			165.324											53.8568		33.9149	52604.7	57081.1	33123.4	40408.2			44161.2			81835.2											26659.1
yedd	b1928		14.983	137		674.149	651.795	651.377	705.89	723.398	671.217	627.913	712.428	689.648	655.009	606.116	620.845	558.479	579.69	576.351	639.37	661.565	721.272	618.613	610.355	635.986	570.113	623.025	92358.4	89296	89238.6	96707	99105.5	91956.7	86024.1	97602.6	94481.7	89736.2	83037.9	85055.7	76511.7	79417.5	78960.1	87593.7	90634.4	98814.3	84750	83618.6	87130.1
yedf	b1930	[o]	8.6389	77			867.393		2477.44			1489.12	2106.9	986.392	2535.3	4946.17		5008.02	5649.54	5088.57			5786.01	3239.04		2686.05				66789.3		190763			114662	162231	75952.2	195218	380855		385618	435015	391820			445522	249406		206826
flif	b1938	[nu]	60.588	552					2.86283															13.0285	9.78056	11.0592	9.97281	6.87121				1580.28															7191.75	5398.87	6104.66
flig	b1939	[n]	36.776	331		13.5768	14.629		9.40882	15.7178	19.2052	15.6833	24.6115	15.4305		24.4343	29.9468	29.109			28.6553	30.1645		26.6798	22.3838	31.6477	30.0445	17.8593	4493.92	4842.19		3114.32	5202.59	6356.91	5191.17	8146.42	5107.48		8087.76	9912.39	9635.08			9484.91	9984.46		8831	7409.03	10475.4
flih	b1940	[nu]	25.05	228																					11.4557																							2611.91
flii	b1941	[nu]	49.315	457
flil	b1944	[n]	17.221	154						23.3226					335.421										37.4363								3591.68					51654.9										5765.19
flin	b1946	[nu]	14.855	137									32.4033			58.8093			104.843	109.275	72.1084	140.193			79.551		100.612	85.9761								4439.25			8056.87			14363.4	14970.6	9878.85	19206.5			10898.5
yedp	b1955	[r]	30.439	271
yedi	b1958	[s]	32.19	305					90.943	64.3485																	76.1926					27737.6	19626.3
hcha	b1967	[r]	31.19	283		1586.77	1291.68	1133.43	703.03	1835.91	1482.68	1127.38	950.303	761.668	2206.94	1718.07	868.198	505.669	251.037	197.328	99.8906		1821.63	585.705	302.02	192.38	111.148	175.285	449056	365546	320762	198957	519562	419598	319049	268936	215552	624563	486213	245700	143104	71043.4	55843.7	28269		515522	165754	85471.7	54443.6
mtfa	b1976		30.279	265		190.682						155.582			137.053								128.751	130.25	77.4823				50530.6						41229.3			36319								34119.1	34516.2	20532.8
amn	b1982	[f]	53.994	484		194.171	171.803	193.836	150.246	184.171	176.158	172.409	163.475	145.838	154.35	145.761	133.19	162.582	112.938	126.045			172.022	114.681	112.833	95.6885	74.6652	80.319	93978.8	83152.7	93816.7	72718.9	89138.6	85260.4	83445.8	79121.8	70585.5	74705.5	70548.2	64464	78689.8	54662	61006			83258.5	55505.5	54611.2	46313.2
yeen	b1983	[s]	25.867	238			144.819	156.666	171.976	124.103			169.228	180.72		124.157			188.532			168.518		158.494	180.049	182.334	202.559	194.126		34466.9	37286.4	40930.3	29536.5			40276.4	43011.3		29549.3			44870.6			40107.3		37721.6	42851.6	43395.5
erfk	b1990	[s]	34.411	310		25.9654	24.3204	10.6124				26.3524																	8049.28	7539.33	3289.83				8169.26
flu	b2000		106.82	1039		20.2387	22.7826	14.8853	11.2708	28.3305	14.9273															9.72505	9.60215	5.49927	21028	23671.1	15465.8	11710.3	29435.3	15509.4															10104.3
yeex	b2007		12.778	109		6434.01	6467.67	6683.72	6272.88	6466.06	6463.34	7146.97	7054.39	6994.11	5723.73	5601.31	5248.97	4776.55	4674.56	4856.86	4599.88	4597.13	6073.09	4649.44	4789.08	4536.56	4622.73	4502.27	701307	704976	728526	683744	704800	704504	779020	768929	762358	623886	610542	572138	520644	509527	529398	501387	501087	661967	506789	522010	494485
yeed	b2012	[o]	8.1482	75
plap	b2014		49.537	452					20.6262															16.488		35.0242		55.5432				9323.03															7452.56		15830.9
yeez	b2016	[mg]	29.68	274		192.478	204.982	187.334	191.932	248.091	221.602	205.615	198.725	208.892	208.539	180.13	187.206		137.148	144.044		111.397	210.142	162.531	156.771	131.264	123.92	129.274	52739	56165.2	51329.4	52589.4	67977	60718.9	56338.4	54450.6	57236.5	57139.7	49355.7	51294.5		37578.5	39467.9		30522.7	57578.8	44533.4	42955.2	35966.3
hisg	b2019	[e]	33.366	299		1401.06	1512.51	1835.25	1913.15	1504.82	1428.1	1666.79	1831.56	1961.8	1006.67	1073.23	1353.38	1628.5	1632.73	1802.78	1759.91	1787.3	1020.7	1553.55	1708.44	1771.19	1775.52	1946.74	418916	452240	548740	572031	449941	427003	498371	547636	586579	300993	320896	404662	486923	488185	539031	526214	534404	305189	464513	510823	529587
hisd	b2020	[e]	46.11	434		724.452	731.709	834.429	904.81	741.797	739.093	806.153	872.723	858.254	498.62	564.06	675.849	859.007	857.852	785.115	800.036	846.18	553.724	756.432	852.476	837.11	797.301	903.79	314412	317562	362142	392688	321940	320766	349870	378762	372482	216401	244802	293319	372809	372308	340740	347216	367242	240316	328291	369975	363306
hisc	b2021	[e]	39.36	356		1184.7	1194.38	1330.74	1303.58	1145.87	1172.2	1248.2	1364.45	1368.16	864.523	910.461	1079.17	1279.58	1253.7	1216.84	1153.87	1134.24	996.987	1259.45	1314.89	1253.75	1210.54	1360.21	421752	425199	473744	464075	407929	417303	444360	485745	487065	307770	324124	384184	455531	446317	433194	410779	403788	354928	448365	468101	446333
hisb	b2022	[e]	40.278	355		806.28	872.999	971.545	1067.16	782.763	805.551	947.23	958.688	1039.1	595.607	741.347	822.087	1028.69	1019.08	1011.29	967.326	963.173	700.58	928.784	986.299	972.631	932.768	1042.31	286229	309915	344898	378840	277881	285971	336267	340334	368880	211440	263178	291841	365186	361774	359009	343401	341926	248706	329718	350136	345284
hish	b2023	[e]	21.653	196		403.886	397.133	479.441	491.029	383.18	361.284	389.55	449.066	417.376	300.587	339.169	434.895	452.636	496.116	406.041	448.533	378.361	340.636	482.476	458.626	450.248	475.799	531.243	79161.7	77838.2	93970.5	96241.6	75103.3	70811.6	76351.8	88017	81805.7	58915.1	66477.1	85239.3	88716.7	97238.8	79584	87912.6	74158.8	66764.6	94565.4	89890.8	88248.6
hisa	b2024	[e]	26.032	245		186.189	218.515	260.988	256.412	200.983	247.202	248.018	236.954	310.767	175.383		235.551		283.567	260.48	238.37	176.137	180.226	252.463	254.354	272.326	284.844	289.094	45616.4	53536.3	63941.9	62821	49240.9	60564.4	60764.5	58053.7	76137.9	42968.8		57710		69473.8	63817.7	58400.7	43153.5	44155.4	61853.5	62316.8	66719.8
hisf	b2025	[e]	28.454	258		355.387	382.899	413.282	427.019	351.515	361.682	382.191	408.995	439.517	293.076	304.296	402.372	424.07	445.087	441.921	422.314	359.655	315.064	421.722	451.757	451.967	417.372	477.639	91689.9	98788.1	106627	110171	90690.8	93313.8	98605.3	105521	113395	75613.5	78508.4	103812	109410	114832	114016	108957	92791	81286.5	108804	116553	116608
hisi	b2026	[e]	22.756	203		84.1932	93.1791	109.463	127.122	75.9415	77.0888	100.925	111.522	129.703	60.0529		92.6412	104.098	103.096	113.363	117.109	132.661		107.588	128.763	120.404	125.707	139.893	17091.2	18915.4	22221	25805.7	15416.1	15649	20487.9	22639.1	26329.7	12190.7		18806.2	21131.9	20928.5	23012.6	23773.2	26930.2		21840.4	26138.8	24442
cld	b2027		36.454	326		1281.64	1418.29	1429.09	1637.7	1279.29	1382.01	1418.81	1610.44	1696.71	1292.82	1360.94	1569.05	1602.59	1724.51	1808.13	1998.9	2119.59	1330.14	1466.6	1644.11	1665.73	1871.71	1860.09	417815	462363	465882	533891	417049	450535	462533	525002	553128	421461	443665	511511	522446	562189	589451	651640	690985	433625	478112	535981	543029
gnd	b2029	[g]	51.481	468		7155.27	8227.92	9680.45	12000.9	7006.82	7365.57	8995.72	10852.7	12166.7	6352.43	6794.25	7779.49	9146.72	10357.4	11628.3	12619.8	15130.6	7778.33	9370.91	10948.2	12184.8	12305	14563.3	3.34867e+06	3.85066e+06	4.53045e+06	5.61644e+06	3.27919e+06	3.44709e+06	4.20999e+06	5.07908e+06	5.69401e+06	2.97294e+06	3.17971e+06	3.6408e+06	4.28066e+06	4.84724e+06	5.44203e+06	5.90608e+06	7.08114e+06	3.64026e+06	4.38559e+06	5.12376e+06	5.70249e+06
wbbk	b2032	[m]	43.188	372		124.967	150.466	143.512	163.951	122.793	143.614	133.619	185.386	207.244	134.351	152.449	171.459	200.044	186.763	221.189	263.856	229.823		175.552	230.646	221.671	212.48	208.578	46487.9	55973.2	53386.6	60989.7	45678.9	53424.6	49706.2	68963.5	77094.7	49978.5	56711.1	63782.8	74416.3	69475.7	82282.3	98154.6	85494.2		65305.4	85800.5	82461.6
wbbj	b2033	[r]	21.675	196
wbbi	b2034		37.757	330		421.02	534.922	632.962	727.38	442.315	513.313	588.214	635.276	774.415	476.481	544.203	657.274	718.193	730.554	873.151	1051.4	1010.18	470.589	752.109	887.861	927.565	910.475	987.383	138937	176524	208878	240035	145964	169393	194111	209641	255557	157239	179587	216900	237004	241083	288140	346962	333361	155294	248196	292994	306096
glf	b2036	[m]	42.965	367		574.332	699.532	714.284	717.444	643.577	659.489	700.585	725.033	801.657	788.605	822.302	989.01	916.237	951.551	950.423	920.488	990.148	834.579	1026.75	1105.13	998.53	952.959	1047.77	210780	256728	262142	263302	236193	242032	257115	266087	294208	289418	301785	362967	336259	349219	348805	337819	363384	306291	376817	405583	366460
rfbc	b2038	[m]	21.27	185		100.548		103.522		118.296		106.629		92.8838		113.918		138.977			125.767	142.421		134.298	143.28		162.48	142.275	18601.4		19151.7		21884.7		19726.3		17183.5		21074.8		25710.8			23266.9	26347.9		24845.2	26506.7
rfba	b2039	[m]	32.693	293		848.447	904.943	957.932	986.689	830.462	899.408	938.641	960.472	1012.49	844.542	929.948	1011.58	1110.95	1201.32	1307.19	1186.91	1254.32	1049.16	1129.6	1235.42	1156.41	1171.96	1326.21	248595	265148	280674	289100	243325	263527	275022	281418	296660	247451	272475	296393	325509	351986	383008	347764	367516	307403	330971	361978	338828
rfbd	b2040	[m]	32.694	299		426.699	475.237	458.05	507.156	392.396	405.602	475.03	477.636	520.854	433.709	438.017	529.921	566.594	594.628	659.206	723.993	749.172	576.975	561.84	627.436	658.091	657.242	783.276	127583	142096	136957	151639	117327	121275	142034	142813	155735	129679	130967	158446	169412	177794	197102	216474	224003	172515	167990	187603	196769
rfbb	b2041	[m]	40.558	361		482.027	602.811	692.811	796.638	471.807	535.97	650.029	711.377	772.589	499.361	515.985	648.123	751.798	894.329	1071.07	1082.75	1236.61	544.519	746.157	904.675	1062.82	1041.44	1203.9	174012	217615	250105	287586	170322	193485	234661	256807	278905	180269	186271	233973	271399	322853	386655	390871	446416	196571	269363	326588	383679
galf	b2042	[m]	32.829	297		1716.07	1639.91	1765.97	1874.21	1598.4	1713.5	1725.21	1791.55	2047.72	1600.73	1569.82	1582.61	1709.72	1714.24	1808.4	1933.76	2161.44	1856.24	1808.09	1794.69	1814.46	1843.93	1979.29	509672	487053	524494	556640	474726	508911	512386	532090	608171	475417	466238	470036	507787	509130	537095	574328	641947	551303	537004	533022	538893
cpsb	b2049	[m]	53.016	478									82.5889																							39477.5
dcd	b2065	[f]	21.249	193		196.343	156.458	138.03	103.85	181.855	170.006	139.601	111.244		171.049									125.753		89.5133	71.4148	60.0261	37894.3	30196.4	26639.9	20043	35098.1	32811.2	26943	21470		33012.5									24270.4		17276.1
udk	b2066	[f]	24.353	213		154.588	208.698	240.115	208.753	139.783	157.385		207.986		159.572	161.065	180.248							194.043	122.993	228.822	269.439	274.078	32927.2	44452.6	51144.4	44464.3	29773.8	33523		44301		33988.9	34306.9	38392.8							41331.2	26197.5	48739.1
yege	b2067		123.89	1105
baes	b2078	[t]	51.991	467										73.4914									243.894														34320.5									113898
yegp	b2080		12.024	110		2454.57	1178.28	639.24	318.431	2469.97	1632.89	890.301	467.69	291.431	2629.07	2258.85	1425.58	776.534	794.735				2596.84	1222.07	483.939	266.33	141.109	118.562	270003	129611	70316.4	35027.4	271696	179618	97933.1	51445.9	32057.4	289198	248473	156814	85418.7	87420.9				285653	134428	53233.3	29296.4
yegq	b2081	[o]	51.193	453		157.484	176.608	180.606	183.635	170.345	149.714	179.721	184.358	177.16	140.4		175.404		224.877				156.696	163.659	169.019	194.019	209.26	221.021	71340.1	80003.6	81814.7	83186.8	77166.4	67820.5	81413.7	83514.4	80253.3	63601.4		79458.2		101869				70983.2	74137.4	76565.6	87890.5
gatd	b2091	[er]	37.39	346		3987.7	3410.02	2774.86	1439.21	4532	2001.74	1440.17	1532.92	939.498	3678.76	2906.46	2061.54	2702.13	2748.27	1764.64	1740.54	746.069	2878.53	5332.94	4395.52	2763.43	2647.82	1905.6	1.37974e+06	1.17987e+06	960103	497967	1.56807e+06	692600	498300	530390	325066	1.27285e+06	1.00564e+06	713294	934938	950902	610567	602229	258140	995972	1.8452e+06	1.52085e+06	956146
gatc	b2092	[g]	48.364	451		5097.37	4637.6	2650.28	1686.04	5249.13	4972.06	3488.15	2178.02	1630.11	6110.96	5236.61	6331.74	5504.21	4427	3597.45	2683.69	1500.68	3936.98	5576.04	4159.78	3506.27	3065.39	2029.71	2.29891e+06	2.09156e+06	1.19528e+06	760404	2.36736e+06	2.2424e+06	1.57315e+06	982287	735178	2.75604e+06	2.36171e+06	2.85561e+06	2.4824e+06	1.99658e+06	1.62245e+06	1.21034e+06	676809	1.77558e+06	2.51479e+06	1.87606e+06	1.58133e+06
gatb	b2093	[g]	10.222	94		75515.3	55900	28224.6	16668.7	69603	72783.8	44784.7	23053.3	16511.5	81192.6	41066.5	44568.8	39649	35413.5	24838.2	18679.5	7808.84	44426.6	68005.6	52089	43594.2	25870.5	19237.4	7.09843e+06	5.2546e+06	2.65311e+06	1.56685e+06	6.54268e+06	6.84167e+06	4.20977e+06	2.16701e+06	1.55208e+06	7.6321e+06	3.86025e+06	4.18946e+06	3.72701e+06	3.32887e+06	2.33479e+06	1.75588e+06	734031	4.1761e+06	6.39252e+06	4.89636e+06	4.09785e+06
gata	b2094	[gt]	16.907	150		25950.6	23820.8	16920.1	11810.1	27235.3	26394.6	20557.2	14761.7	11927.2	25805.7	28279.4	31092.3	27931.4	25151.2	20434	16059.6	5851.23	23982.5	26759.7	23881.3	21741.9	19891.9	13706.3	3.8926e+06	3.57312e+06	2.53801e+06	1.77151e+06	4.0853e+06	3.9592e+06	3.08358e+06	2.21425e+06	1.78909e+06	3.87086e+06	4.24191e+06	4.66385e+06	4.18971e+06	3.77268e+06	3.0651e+06	2.40894e+06	877685	3.59738e+06	4.01396e+06	3.5822e+06	3.26128e+06
gatz	b2095	[g]	47.108	420		28955.9	33818.9	24086.2	22648.4	57559.4	28952.7	21046.3	22458.9	17307.5	30166.7	22340.5	30240.3	22444.6	20145.2	24511.5	17053.2	14133.2	16625	23732.4	31278.1	31647.5	24299.6	20616.5	1.21615e+07	1.42039e+07	1.01162e+07	9.51233e+06	2.41749e+07	1.21601e+07	8.83946e+06	9.43276e+06	7.26917e+06	1.267e+07	9.38302e+06	1.27009e+07	9.42672e+06	8.46097e+06	1.02948e+07	7.16232e+06	5.93593e+06	6.9825e+06	9.9676e+06	1.31368e+07	1.3292e+07
gaty	b2096	[g]	30.812	284		55071.6	39431.4	21272.5	11902.4	58053.4	52111	28004.7	15550.2	11893.9	62055.4	56425.9	51090.3	41949.8	31202.2	23949.2	17129.1	9997.58	48837.7	42465.6	31575.3	23724.2	19546	13093.8	1.56403e+07	1.11985e+07	6.0414e+06	3.38029e+06	1.64872e+07	1.47995e+07	7.95333e+06	4.41624e+06	3.37788e+06	1.76237e+07	1.6025e+07	1.45097e+07	1.19137e+07	8.86143e+06	6.80156e+06	4.86465e+06	2.83931e+06	1.38699e+07	1.20602e+07	8.96739e+06	6.73768e+06
fbab	b2097		38.109	350		4428.05	3105.36	2386.61	1543.45	4830.32	3464.72	2767.16	1701.76	1564.22	6356.9	5247.36	3805.74	2536.65	1462.87	867.553	668.511	549.809	5217.32	3191.78	1928.87	1138.9	679.173	566.852	1.54982e+06	1.08688e+06	835313	540207	1.69061e+06	1.21265e+06	968505	595616	547476	2.22491e+06	1.83658e+06	1.33201e+06	887829	512006	303644	233979	192433	1.82606e+06	1.11712e+06	675103	398615
thid	b2103	[h]	28.633	266		617.561	523.169	437.292	406.001	576.126	545.405	449.442	418.989	416.06	551.109	524.465	479.734	426.999	422.647	373.804	457.573	363.582	606.727	443.097	410.601	367.938	379.242	375.781	164271	139163	116320	107996	153249	145078	119552	111451	110672	146595	139508	127609	113582	112424	99431.8	121714	96712.9	161389	117864	109220	97871.6
thim	b2104	[h]	27.339	262		497.678	470.869	375.237	355.398	458.418	407.256	379.597	372.816	371.623	464.222	443.534	384.252	316.818	323.231	357.382	317.256	304.557	481.473	395.825	374.514	375.637	336.295	319.543	130392	123368	98312.1	93114.3	120105	106701	99454.4	97677.8	97365.3	121626	116206	100674	83006.3	84686.5	93634	83121	79793.9	126146	103706	98122.8	98416.8
rcnr	b2105		10.134	90		858.334	748.933	600.716		1001.22			806.158	763.427				482.201						560.844		495.786	411.72		77250.1	67404	54064.4		90110.1			72554.2	68708.5				43398.1						50475.9		44620.8
rcnb	b2107		12.466	112												374.525									176.317														41946.8									19747.5
mrp	b2113		39.938	369		472.326	459.693	457	518.819	483.746	478.898	477.025	488.292	534.156	408.224	464.742	460.43	473.92	520.073	464.251	511.949	586.085	466.131	472.818	454.747	461.172	497.328	542.197	174288	169627	168633	191444	178502	176713	176022	180180	197103	150634	171490	169899	174876	191907	171309	188909	216265	172003	174470	167802	170172
metg	b2114	[j]	76.254	677		954.419	967.687	950.736	1072.54	965.135	951.432	986.382	1027.54	1115.74	802.802	897.383	911.528	951.807	961.396	989.716	1019.82	1092.71	855.608	873.576	913.949	902.332	973.069	951.327	646141	655124	643648	726108	653396	644119	667781	695644	755356	543497	607528	617105	644373	650865	670038	690420	739763	579246	591411	618744	610879
osmf	b2131		32.609	305		478.727	360.986	244.906	201.344	597.431	197.221	198.776	196.255	219.477	174.287	290.77			202.347		268.732			247.412	213.65	163.297	189.249	201.497	146012	110101	74696.4	61409.9	182217	60152.4	60626.6	59857.7	66940.4	53157.5	88684.9			61715.9		81963.3			75460.6	65163.3	49805.5
bglx	b2132	[g]	83.459	765		179.172	168.489	188.946	158.62	128.156	155.911	167.809	171.623	179.656	174.264	183.495	167.024	203.17	165.504	202.347	183.612	171.558	165.561	182.39	199.523	181.588	196.669	172.47	137066	128894	144544	121344	98039.7	119272	128374	131291	137437	133312	140374	127773	155425	126610	154796	140463	131242	126654	139528	152635	138915
dld	b2133	[c]	64.612	571		1126.95	991.811	821.248	683.272	1128.16	1138.04	922.532	755.502	621.404	1092.24	1125.77	1136.66	881.376	749.297	471.967	412.082	393.069	1107.59	936.395	778.341	560.532	450.009	385.617	643490	566324	468932	390148	644182	649822	526766	431391	354822	623669	642813	649031	503266	427849	269493	235299	224442	632434	534682	444433	320064
pbpg	b2134	[m]	33.887	310				23.9574	30.3283																			31.7599			7426.8	9401.79
cdd	b2143	[f]	31.54	294		260.694	202.792	137.563	113.891	281.417	134.591	137.115	112.65		325.665		188.069		88.5183		55.6853	45.5469		146.608	92.3889	72.0114	53.6548	58.1225	76644.1	59620.7	40443.5	33483.8	82736.7	39569.6	40311.9	33119		95745.4		55292.2		26024.4		16371.5	13390.8		43102.7	27162.3	21171.4
mglc	b2148	[g]	35.55	336
mgla	b2149	[g]	56.415	506		664.708	671.132	484.837	194.429	837.432	566.842	559.465	356.982	206.439	691.507	589.45	645.472	692.218	610.346	734.634	511.707	114.937	531.61	800.364	842.537	1011.25	988.66	581.759	336342	339593	245327	98381.2	423741	286822	283089	180633	104458	349903	298262	326609	350262	308835	371725	258924	58158.3	268995	404984	426324	511695
mglb	b2150	[g]	35.712	332		67532.7	57706.9	27858.1	8087.28	53533.1	41132.2	29689.7	17860.6	7440.78	70733.4	36372.5	59421.8	42532.5	29680	43069.4	35136	1614.53	15243.8	70766.7	29094.3	64779	78757.9	18853.4	2.24208e+07	1.91587e+07	9.2489e+06	2.68498e+06	1.7773e+07	1.36559e+07	9.85699e+06	5.92971e+06	2.47034e+06	2.34835e+07	1.20757e+07	1.9728e+07	1.41208e+07	9.85377e+06	1.4299e+07	1.16652e+07	536023	5.06094e+06	2.34946e+07	9.6593e+06	2.15066e+07
fole	b2153	[h]	24.83	222		2225.68	2358.37	2536.61	2721.52	2131.09	2336.11	2318.38	2554.07	2818.03	1623.52	1593.09	1793.57	1771.66	1876.89	1822.29	1723	1939.69	1471.91	1706.49	1757.03	1657.26	1762.26	1690.86	494101	523557	563128	604178	473103	518616	514681	567004	625603	360421	353666	398173	393309	416669	404548	382506	430610	326765	378841	390061	367911
yeig	b2154	[r]	31.259	278												176.59	134.052							161.211	156.759														49092	37266.4							44816.7	43579
cira	b2155	[p]	73.895	663		52.0146	62.1922	79.3634	68.9038	42.8061	41.987	77.0979	80.8566	87.6091	40.1077	74.6464	89.3806	111.732	134.806	107.357	90.5778	64.1429		90.7187	93.6903	75.6568	105.584	38.5317	34485.7	41233.5	52617.9	45683.2	28380.4	27837.4	51115.9	53607.9	58084.8	26591.4	49490.5	59259.3	74078	89376.2	71177.5	60053.1	42526.7		60146.5	62116.6	50160.5
lysp	b2156	[e]	53.575	489				68.6953	183.333	43.8965																					33592	89650	21465.4
nfo	b2159	[l]	31.479	285					57.3769												51.4616											16352.4												14666.6
psug	b2165		32.909	312
frua	b2167	[g]	57.518	563		63.234	58.452	51.6816	42.0775	82.5796	66.5668		52.4099	39.2588	74.2664									54.948	88.7777	49.5684		42.4437	35600.7	32908.5	29096.7	23689.7	46492.3	37477.1		29506.8	22102.7	41812									30935.7	49981.8	27907
fruk	b2168	[g]	33.755	312		72.5931	76.9597	88.8489	64.2013	86.6844		90.9724	95.1951	87.8474	90.07	69.1558	74.5888	89.4145	83.5093	85.9354			76.8312	79.5901	89.0755	83.2338	75.1822	68.4093	22649	24011.4	27720.8	20030.8	27045.5		28383.4	29700.9	27408.4	28101.8	21576.6	23271.7	27897.3	26054.9	26811.9			23971.3	24832.1	27791.6	25968.9
frub	b2169	[g]	39.647	376		119.789	112.541	104.164	107.743	159.649	155.599		114.717						112.043				107.537	124.048	114.35	108.719	98.2768	101.806	45040.8	42315.3	39165.6	40511.3	60028.1	58505.3		43133.7						42128.3				40433.9	46642	42995.5	40878.5
yeip	b2171		21.532	190		778.741	895.22	956.395	942.978	805.211	868.624	867.171	885.051	909.575	997.235	1044.49	1210.35	1133.83	1305.04	1237.29	1190.1	740.113	956.363	1217.11	1225.41	1184.92	1312.68	1181.56	147961	170092	181715	179166	152990	165039	164763	168160	172819	189475	198452	229966	215427	247958	235085	226120	140621	181709	231251	232828	225134
spr	b2175	[m]	21.04	188																					101.352																							19054.3
yejf	b2180	[r]	58.725	529		27.8119	26.3809	24.0848						251.551					55.8645							46.6012			14712.5	13955.5	12740.9						133071					29552.3							24652.1
rsua	b2183	[j]	25.865	231		237.663	252.305	274.868	274.365	254.348	248.404	265.393	276.485	288.989	205.824	210.569	233.003	280.856	266.413	250.128	258.336	228.76	247.563	228.419	242.605	259.4	253.586	257.581	54900.2	58282.4	63494.4	63378.2	58754.4	57381.4	61305.8	63868	66756.4	47545.4	48641.5	53823.6	64877.8	61541.4	57779.6	59675.7	52843.6	57187	52764.7	56041.6	59921.4
rply	b2185	[j]	10.693	94		17335.5	20728.3	23427.2	26421.2	17042.1	18424.6	21783.8	24810.3	26354.4	17450.4	19068.4	22445.2	26063.1	28079	30977	32646.2	32499.4	17335.8	23938.1	28419.7	30993	31601.5	32688.1	1.62953e+06	1.94846e+06	2.20215e+06	2.48359e+06	1.60196e+06	1.73191e+06	2.04768e+06	2.33217e+06	2.47732e+06	1.64033e+06	1.79243e+06	2.10984e+06	2.44993e+06	2.63942e+06	2.91184e+06	3.06874e+06	3.05494e+06	1.62956e+06	2.25018e+06	2.67145e+06	2.91334e+06
yejk	b2186	[r]	37.822	335		504.508	507.534	388.088	463.608	517.382	553.607	461.719	409.431	394.601	553.333	544.796	480.837	501.077	437.803	428.592	439.348	530.539	427.521	568.768	536.771	469.47	549.191	481.117	169010	170024	130010	155309	173323	185458	154676	137159	132191	185367	182507	161080	167861	146664	143578	147182	177731	143219	190537	179818	157272
yejl	b2187	[s]	8.2884	75		829.136				309.014		438.977	662.524	618.38	390.443									412.949	339.146		330.545	704.395	62185.2				23176.1		32923.3	49689.3	46378.5	29283.2									30971.2	25436
narp	b2193	[tk]	23.575	215			87.1285	73.263																		102.76	102.617	97.5022		18732.6	15751.5																		22093.5
eco	b2209	[r]	18.192	162			231.003		167.316	246.718		231.651				300.421	155.326	150.292						241.3				119.019		37422.5		27105.3	39968.3		37527.4				48668.3	25162.9	24347.3						39090.5
mqo	b2210	[r]	60.229	548					40.9341																	31.0442	85.249	114.732				22431.9																	17012.2
ompc	b2215	[m]	40.368	367		54766.6	42290.9	35802.5	39484.2	54705.2	49697.5	36116.7	36079.9	39919.2	68324.3	63999.8	52910.8	48847.1	42924.8	43716.7	48496.1	56060.2	71730.3	46664	45273.7	44439.5	44558.5	48426.2	2.00993e+07	1.55207e+07	1.31395e+07	1.44907e+07	2.00768e+07	1.8239e+07	1.32548e+07	1.32413e+07	1.46503e+07	2.5075e+07	2.34879e+07	1.94182e+07	1.79269e+07	1.57534e+07	1.6044e+07	1.77981e+07	2.05741e+07	2.6325e+07	1.71257e+07	1.66154e+07	1.63093e+07
rcsd	b2216	[t]	100.37	890		23.7318	18.3765	18.4224	22.1728	21.3773			19.634									17.8525		16.6632	16.1715	17.0504	15.5789	14.5025	21121.3	16355.1	16395.9	19733.7	19025.8			17474.2									15888.8		14830.2	14392.6	15174.8
rcsb	b2217	[tk]	23.67	216		1547.8	1459.6	1391.91	1357.9	1509.19	1525	1440.7	1325.29	1312.75	1645.57	1489.76	1501.08	1492.29	1367.28	1211.18	1238.13	881.61	1771.97	1584.58	1493.29	1409.1	1326.6	1319.74	334324	315273	300652	293307	325984	329400	311190	286262	283554	355443	321788	324234	322336	295332	261614	267436	190428	382746	342268	322551	304366
gyra	b2231	[l]	96.962	875		875.192	914.936	985.051	1054.2	824.054	853.73	910.624	1034.43	1058.06	771.882	794.425	895.552	930.051	1026.18	1008.3	1070.12	1150.16	823.208	948.681	999.301	1036.23	1044.9	1121.61	765793	800569	861920	922424	721048	747014	796796	905129	925801	675396	695122	783608	813795	897909	882264	936355	1.00639e+06	720307	830096	874388	906705
ubig	b2232	[h]	26.555	240		357.26	460.237	531.938	473.512	471.911	419.838	467.968	459.231	499.89	432.565	433.67	539.427		334.609	627.728	407.284	392.89	434.877	431.084	494.531	442.432	421.739	435.608	85742.5	110457	127665	113643	113259	100761	112312	110215	119974	103816	104081	129462		80306.2	150655	97748.1	94293.6	104370	103460	118688	106184
nrda	b2234	[f]	85.774	761		1018.48	1060.65	1070.37	898.951	1021.87	987.406	1034.76	962.257	874.157	813.119	802.372	893.37	908.291	976.615	984.954	933.456	946.294	880.445	908.658	947.917	902.601	956.355	978.752	775065	807157	814555	684102	777642	751416	787450	732278	665233	618783	610605	679855	691210	743204	749550	710360	720130	670019	691489	721365	686879
nrdb	b2235	[f]	43.517	376		667.393	683.972	660.552	541.326	648.488	663.984	652.383	631.508	611.942	601.343	575.826	672.189	601.719	652.52	640.159	613.305	632.034	644.24	646.024	639.813	620.03	626.542	628.813	250940	257174	248367	203539	243831	249658	245296	237447	230090	226105	216510	252743	226246	245347	240700	230603	237645	242234	242905	240570	233131
yfay	b2249	[r]	44.225	400																			36.1319			26.1789																				14452.8			10471.6
arnb	b2253		41.649	379							222.545	266.489			295.502	292.555		155.012					171.549	353.22	412.423									84344.7	100999			111995	110878		58749.6					65017.1	133870	156308
arnc	b2254		36.339	322							62.135																							20007.5
arna	b2255		74.288	660		21.3003	23.5352	20.2895		69.4712	32.0587	83.8468	27.082		33.2225		92.0434							62.3381		9.64331			14058.2	15533.2	13391		45851	21158.8	55338.9	17874.1		21926.8		60748.7							41143.1		6364.59
menb	b2262	[h]	31.633	285		432.347	389.443	407.165	361.094	393.652	385.601	345.052	396.761	417.376	355.321	399.684	353.559	377.552	343.62		348.547	378.743	423.226	395.417	371.868	400.892	383.961	397.259	123219	110991	116042	102912	112191	109896	98339.9	113077	118952	101267	113910	100764	107602	97931.6		99336	107942	120619	112694	105982	114254
elab	b2266	[s]	11.306	101		7059.16	5214.61	4065.81	2955.31	6276.33	5236.12	4147.94	3825.39	3000.92	7832.44	6163.2	4569.63	3323.43	2229.93	1157.92	1065.72	889.983	8703.83	3671.58	2437.98	1481.98	1027.45	804.056	712975	526675	410647	298486	633910	528849	418942	386364	303093	791076	622483	461532	335666	225223	116950	107637	89888.3	879087	370830	246236	149680
elaa	b2267	[r]	17.419	153			117.904																							18039.4
nuom	b2277	[c]	56.524	509		309.422	337.865	357.307			312.965	250.871			393.532											407.469	397.75	66.6226	157496	171973	181869			159299	127693			200308											207401
nuoj	b2280	[c]	19.874	184		40.9757	52.085			44.2473	43.9685		48.1126	38.6531	52.8489			36.7838	54.6546		51.4165		52.0977	55.7417		61.2199	54.585	51.8221	7539.54	9583.63			8141.51	8090.21		8852.72	7112.18	9724.2			6768.23	10056.5		9460.63		9585.98	10256.5		11264.5
nuoi	b2281	[c]	20.538	180		1097.97	1132.97	1130.41	982.72	1092.8	1114.75	1168.62	1191.88	972.072	1265.15	1217.11	1244.18	1325.35	1264.22	1339.86	1331.27	1015.15	1166.94	1345.62	1308.37	1404.88	1235.93	1249.84	197635	203935	203474	176890	196705	200656	210351	214539	174973	227727	219080	223952	238564	227559	241174	239629	182727	210049	242211	235506	252878
nuoh	b2282	[c]	36.219	325
nuog	b2283		100.3	908		874.594	881.845	966.683	811.448	893.16	900.857	975.817	932.347	841.249	1029.33	1083.11	1159.96	1274.67	1132.81	1145.71	1168.96	920.512	960.389	1195.47	1222.17	1228.44	1142.97	1104.67	794132	800715	877748	736795	810989	817978	886042	846571	763855	934631	983462	1.05324e+06	1.1574e+06	1.02859e+06	1.04031e+06	1.06142e+06	835825	872033	1.08549e+06	1.10973e+06	1.11542e+06
nuof	b2284	[c]	49.292	445		1534.62	1595.29	1699.48	1267.58	1639.39	1650.9	1703.66	1502.76	1212.11	1707.91	1891.2	1884.94	2000.38	1843.41	1773.94	1740.86	1385.39	1673.44	1983.21	1994.88	1899.36	1741.77	1642.91	682906	709903	756270	564072	729527	734650	758127	668729	539390	760020	841583	838800	890168	820318	789402	774681	616501	744683	882530	887720	845214
nuoe	b2285	[c]	18.59	166		591.021	574.406	538.338	485.866	512.645	567.026	572.673	458.612	435.806	614.97	709.936	704.977	700.861	509.564	617.976	589.758	512.544	594.963	646.875	711.562	784.89	661.961	623.765	98109.5	95351.4	89364.1	80653.7	85099.1	94126.3	95063.7	76129.5	72343.8	102085	117849	117026	116343	84587.7	102584	97899.9	85082.4	98763.8	107381	118119	130292
nuoc	b2286	[c]	68.235	596		1500.36	1558.23	1624.54	1286.55	1584.59	1563.03	1595.6	1586.15	1308.71	1672.23	1807.65	1943.95	2012.39	1967.24	1943.86	1886.89	1605.08	1525.92	2021.14	2114.15	1972.8	1931.18	1817.53	894215	928705	968225	766783	944416	931568	950975	945348	779993	996649	1.07736e+06	1.1586e+06	1.19938e+06	1.17248e+06	1.15854e+06	1.12459e+06	956630	909450	1.2046e+06	1.26004e+06	1.17579e+06
nuob	b2287	[c]	25.056	220		1640.01	1674.52	1755.61	1284.34	1708.66	1758.55	1756.23	1618.64	1409.92	1870.22	1820.12	1957.95	1948.79	2058.29	1944.3	1806.84	1633.94	1710	2057.24	2086.26	2056.96	1900.14	1887.59	360802	368394	386235	282555	375905	386881	386370	356101	310183	411448	400427	430748	428734	452823	427745	397504	359467	376200	452593	458977	452532
nuoa	b2288		16.457	147		429.214	444.129	422.914	377.614	388.032	224.573	407.827	461.919	332.848	454.736		487.033	529.922	448.948		550.007		419.615	599.442	571.915	499.895	535.695	524.635	63094.4	65287	62168.3	55509.2	57040.7	33012.2	59950.6	67902	48928.6	66846.2		71593.9	77898.6	65995.4		80851		61683.4	88118	84071.5	73484.6
alaa	b2290		45.517	405		147.402	143.081	109.189	78.2907	153.119	146.583	117.179	87.3491	85.2029	149.425	126.404	169.487		161.747	132.04	112.137	112.897		166.841	141.41	131.023	123.977	98.2455	59698	57947.6	44221.6	31707.7	62013.1	59366	47457.7	35376.4	34507.2	60517.1	51193.5	68642.3		65507.7	53476	45415.6	45723.2		67570.4	57271	53064.1
yfbr	b2291	[r]	22.708	199		45.7829	52.4902								37.0021									36.5611				34.1498	9110.8	10445.5								7363.43									7275.66
yfbt	b2293	[r]	23.007	216		93.7744	91.8964	30.0096							38.6238													27.0915	20255.3	19849.6	6482.08							8342.75
yfbu	b2294	[s]	19.536	164		1996.49	1924.51	2101.01	1770.2	2017.79	1995.03	2108.46	2004.93	1818.64	1662.53	1719.2	1665.6	1476.91	1428.48	1306.9	1213.86	1230.93	1650.97	1555.46	1448.76	1345.28	1230.88	1195.91	327424	315620	344566	290313	330918	327185	345787	328809	298257	272656	281948	273158	242213	234271	214331	199073	201872	270759	255095	237597	220625
acka	b2296	[c]	43.29	400		1587.97	1226.23	985.734	774.792	1482.43	1368.76	1166.28	892.602	816.301	1583.76	1601.79	1417.28	1197.61	930.187	798.647	1029.34	1355.07	1877.31	1274.03	1054.66	815.988	835.236	1031.78	635188	490491	394294	309917	592971	547505	466512	357041	326520	633506	640715	566913	479042	372075	319459	411735	542028	750924	509612	421864	326395
pta	b2297	[r]	77.171	714		1300.46	1147.2	900.862	746.279	1337.39	1228.1	1064.32	850.595	770.771	1616.01	1600.66	1459.81	1368.57	1077.91	937.388	955.475	1176.89	1733.41	1355.68	1182.62	967.473	904.688	953.202	928526	819101	643216	532843	954899	876862	759926	607325	550331	1.15383e+06	1.14287e+06	1.04231e+06	977156	769624	669295	682209	840298	1.23766e+06	967957	844393	690776
yfcd	b2299	[lr]	20.376	180			118.956	112.034	96.4338	99.8611					102.481									110.03	109.75	106.933	119.711	115.274		21412.1	20166.1	17358.1	17975					18446.6									19805.5	19755.1	19247.9
yfce	b2300		20.122	184		260.926	200.621	212.533	197.624	219.802	259.713	243.113	173.235	147.519	230.53	221.267	252.217	220.953	178.925	179.812			252.022	191.393	210.534	175.339	162.312	147.58	48010.4	36914.2	39106	36362.9	40443.5	47787.3	44732.7	31875.3	27143.5	42417.5	40713.1	46408	40655.3	32922.1	33085.3			46372	35216.3	38738.2	32262.5
yfcg	b2302	[o]	24.516	215		15.007	17.9629	14.0305		32.2164																			3226.51	3862.03	3016.57		6926.53
folx	b2303	[h]	14.082	120		1173.09	1277.66	1343.61	1301.71	1153.53	1209.08	1154.77	1374.19	1443.82	948.033	997.274	1110.97	1138.14	1079.25	1359.51	1203.16	1150.14	1054.84	1081.17	1153.68	1138.93	1143.94	1141.4	140771	153320	161233	156206	138424	145089	138572	164903	173258	113764	119673	133316	136577	129510	163141	144379	138017	126580	129740	138441	136672
yfch	b2304	[r]	32.698	297		174.054	114.029	98.4327		182.737	156.594	102.613	74.7255	63.5347	231.663	167.8	130.211				32.6293		164.995	88.3866	61.4041	51.0534	41.332	31.652	51694.1	33866.6	29234.5		54272.9	46508.3	30476.2	22193.5	18869.8	68803.9	49836.6	38672.8				9690.89		49003.6	26250.8	18237	15162.9
hisp	b2306	[e]	28.653	257		123.217	104.546	83.5695	79.4049	131.666	120.651	100.843	93.5318	81.2209	134.481	125.329			107.311					118.827	111.153	81.5097	87.152	80.8826	31666.8	26868.3	21477.4	20407.1	33838	31007.3	25916.5	24037.7	20873.8	34561.7	32209.5			27578.9					30538.5	28566.3	20948
hisq	b2308	[e]	24.649	228
hisj	b2309	[et]	28.483	260		3590.49	3503.16	2590.05	3148.55	3202.02	3827.24	3209.75	2637.59	2867.94	3815	3323.71	3028.04	4519.65	4160.09	4573.36	3871.97	777.335	3238.37	3907.35	3788.53	4011.44	7401.33	3612.48	933526	910823	673414	818622	832524	995082	834535	685774	745664	991899	864165	787290	1.17511e+06	1.08162e+06	1.18907e+06	1.00671e+06	202107	841976	1.01591e+06	985018	1.04297e+06
argt	b2310	[et]	27.991	260		17858.5	12222.9	4470.78	2155.1	15110	14651.6	7511.56	2911.64	2003.27	22473.4	11979.2	9759.83	9596.46	4848.34	2467.21	1592.23	399.885	15754.8	10322.1	6205.06	3300.16	3450.09	1237.13	4.64321e+06	3.17797e+06	1.1624e+06	560326	3.92859e+06	3.80942e+06	1.95301e+06	757026	520851	5.84308e+06	3.11458e+06	2.53756e+06	2.49508e+06	1.26057e+06	641476	413980	103970	4.09625e+06	2.68376e+06	1.61332e+06	858042
purf	b2312	[f]	56.487	505		217.76	305.813	368.688	491.305	234.656	260.471	301.326	458.174	435.688	260.237	287.666	379.733	477.685	516.152	603.272	709.574	904.031	327.788	403.797	490.16	582.517	669.942	812.486	109969	154436	186187	248109	118501	131538	152170	231378	220023	131419	145272	191765	241231	260657	304652	358335	456536	165533	203918	247531	294171
dedd	b2314	[s]	22.938	220			100.401	98.7621								104.486									98.1262					22088.2	21727.7								22986.9									21587.8
folc	b2315	[h]	45.405	422		65.836	83.4575	73.0989	80.5255	71.0208	72.0958	87.0508	83.7624	85.7772	77.3258	80.7024			110.751					86.4353	88.5364	86.9192	85.414	89.6898	27782.8	35219.1	30847.7	33981.8	29970.8	30424.4	36735.5	35347.7	36198	32631.5	34056.4			46736.9					36475.7	37362.3	36679.9
accd	b2316	[i]	33.322	304		1469.53	1435.9	1393.85	1429.92	1484.68	1467.75	1375.92	1425.93	1446.96	1607.89	1601.58	1685.93	1664.92	1570.09	1648.5	1629.84	1686.38	1634.72	1557.59	1600.95	1579.52	1578.84	1649.19	446736	436515	423731	434696	451344	446195	418279	433483	439876	488799	486881	512524	506135	477308	501144	495470	512660	496954	473506	486688	480174
usg	b2319	[e]	36.364	337		162.35	163.359	158.71	150.452	179.091	166.625	164.026	159.412	133.76	165.044	178.276	176.922	165.704	150.029	137.151	148.33	152.79	176.417	155.712	155.156	143.202	144.545	146.073	54712.1	55051.9	53485.4	50702.2	60353.8	56152.8	55276.9	53721.8	45077	55619.9	60079.1	59622.8	55842.4	50559.9	46219.8	49987.3	51490.4	59452.5	52474.9	52287.7	48259.2
pdxb	b2320	[he]	41.367	378		459.316	451.876	428.171	407.092	465.256	424.774	429.411	428.428	427.643	433.137	449.826	459.512	463.815	448.954	406.944	405.637	414.148	424.449	464.491	412.724	416.524	380.823	398.628	173621	170809	161849	153881	175867	160564	162317	161946	161649	163726	170034	173695	175322	169704	153825	153331	156548	160442	175578	156010	157446
fabb	b2323	[iq]	42.613	406		12733.3	12451.6	10193.8	8660.42	12636.1	13147.2	10825	9592.47	9218.04	13909	13668.4	13473.6	13014	12075	11428.2	10431.2	10725.7	15284.5	13018.2	12709.2	11699.1	10901.1	11028.4	5.16971e+06	5.05533e+06	4.13868e+06	3.51613e+06	5.13026e+06	5.33777e+06	4.39495e+06	3.89454e+06	3.74252e+06	5.64706e+06	5.54936e+06	5.47028e+06	5.28367e+06	4.90245e+06	4.63986e+06	4.23505e+06	4.35465e+06	6.20551e+06	5.28541e+06	5.15993e+06	4.74982e+06
aroc	b2329	[e]	39.137	361		252.105	262.103	260.043	240.134	276.642	245.192	278.684	260.226	276.416	244.746	231.148	263.895	199.774	261.366	280.687	214.302	232.534	253.485	264.929	271.072	273.764	254.731	255.109	91009.9	94619.2	93875.6	86688.5	99867.9	88514.1	100605	93941.6	99786	88353.3	83444.6	95266.1	72118.5	94353.2	101328	77362.9	83944.8	91508	95639.4	97856.8	98828.7
prmb	b2330		35.001	310		309.276	303.558	285.484	295.392	318.201	324.729	293.139	277.395	299.549	336.45	356.919	295.328	285.454	251.4	225.945		241.14	352.148	289.526	259.276	231.301	242.327	252.822	95875.7	94102.9	88500.1	91571.5	98642.2	100666	90873.1	85992.5	92860.2	104299	110645	91551.8	88490.7	77933.9	70042.9		74753.5	109166	89753	80375.5	71703.5
fadj	b2341		77.071	714		9.13125																							6519.71
fadi	b2342		46.53	436		101.691				83.0951		20.1225			74.7994									22.5679					44337.3				36229.5		8773.43			32612.5									9839.61
yfcz	b2343	[s]	10.318	94		807.356		569.815																		489.9		519.982	75891.4		53562.6																		46050.6
fadl	b2344	[i]	48.541	446		1593.3	1059.19	549.64	217.806	1650.85	1292.43	744.311	319.568	201.497	1617.9	1719.07	1199.37	878.499	577.857	415.13	335.335	212.289	1557.73	1076.15	738.02	527.611	359.351	318.414	710612	472397	245140	97141.7	736281	576423	331963	142527	89867.6	721582	766706	534918	391811	257724	185148	149559	94680.8	694748	479963	329157	235314
mlaa	b2346		28.041	251		306.604	269.729		377.398	328.193	299.708	313.104	355.563	409.343	330.917	312.019	310.497	358.533	335.874		436.741			396.623		379.593	382.682	336.862	76957.5	67702		94726.8	82376.4	75226.8	78589.2	89246.3	102745	83060.1	78316.8	77934.8	89991.8	84304.3		109622			99552.5		95277.9
ints	b2349	[l]	44.061	385					13.7506																							5294
gtrb	b2351		34.635	306		83.0352	86.0619	91.0819	94.0996	84.1324	107.888	80.5731	96.1824	102.806	91.0427	89.0899	118.263	96.2907	101.794	102.78		136.567	95.434	99.8851	91.2134	114.208	108.499	105.598	25408.8	26334.9	27871.1	28794.5	25744.5	33013.6	24655.4	29431.8	31458.6	27859.1	27261.5	36188.3	29464.9	31148.9	31450.8		41789.4	29202.8	30564.8	27911.3	34947.6
gtrs	b2352		51.483	443		24.9501	40.5598	28.885			26.6686	25.4511	31.9094		28.526		28.4953					55.2512		31.4475	30.4911	35.8345	40.4148	41.1752	11052.9	17968	12796.1			11814.2	11274.8	14135.9		12637		12623.4					24476.3		13931.2	13507.6	15874.7
evga	b2369	[tk]	22.69	204			70.2868		277.049	65.1163	85.8238		93.0019	76.9084	57.6193	138.604			94.4685		83.7441					162.848		168.687		14338.5		56518.1	13283.7	17508.1		18972.4	15689.3	11754.3	28275.1			19271.6		17083.8					33221.1
alac	b2379		46.216	412			38.8263		34.8495															38.0153	33.1249	27.8343		25.4792		15996.4		14358															15662.3	13647.4	11467.7
frya	b2383		92.129	831
glk	b2388	[g]	34.723	321		929.255	821.665	818.517	591.434	881.65	844.928	818.002	771.325	650.671	878.141	782.568	647.331	687.301	563.108	508.921	489.336	400.638	739.822	690.439	632.319	544.196	584.767	500.3	298291	263754	262744	189850	283010	271222	262579	247595	208865	281883	251204	207793	220624	180758	163364	157077	128605	237483	221631	202975	174687
nupc	b2393	[f]	43.475	400		74.0786		73.0952	80.4681	67.3144	75.8221	69.2689	77.0379		83.0152	86.9667	80.0704	88.9613			85.6803	95.9968		87.2413	87.1798	85.9891	83.588	93.6545	29631.4		29238.1	32187.2	26925.7	30328.8	27707.6	30815.2		33206.1	34786.7	32028.2	35584.5			34272.1	38398.7		34896.5	34871.9	34395.6
gltx	b2400	[j]	53.815	471		1392.89	1555.13	1583.28	1672.95	1394.38	1504.55	1524.21	1716.6	1874.68	1391.58	1539.35	1670.91	1724.01	1854.31	2057.78	2023.15	2175.89	1609.23	1786.16	1982.47	2022.83	2043.65	2212.17	656053	732467	745724	787959	656754	708643	717905	808518	882975	655434	725033	786998	812007	873382	969216	952904	1.02484e+06	757949	841281	933745	952755
liga	b2411	[l]	73.605	671				56.9398	56.035		52.1914	59.3074			49.9747									63.0395				60.6965			38206.6	37599.5		35020.5	39795.3			33533									42299.5
zipa	b2412	[d]	36.475	328		312.626	301.169	267.111	264.117	343.817	322.291	269.404	277.766	270.563	330.358	314.59	291.648	255.226	201.741	235.46	190.882			267.917	265.438	206.395	203.173	209.101	102541	98783.4	87612.4	86630.2	112772	105711	88364.5	91107.3	88744.5	108357	103185	95660.5	83714.2	66171	77230.8	62609.4			87876.9	87063.7	67697.7
cysk	b2414	[e]	34.489	323		36892.8	39866.3	37322.6	36805	37815.6	38748.8	39460.5	37176	37278.1	24451.9	25243	27313.7	27957.6	28296	26923.7	24488.5	21726.9	26240.9	28610.5	29282.4	28243.9	25691.1	23778.4	1.19164e+07	1.28768e+07	1.20552e+07	1.1888e+07	1.22144e+07	1.25159e+07	1.27457e+07	1.20078e+07	1.20408e+07	7.89797e+06	8.15349e+06	8.82231e+06	9.03032e+06	9.13961e+06	8.69635e+06	7.90979e+06	7.01778e+06	8.4758e+06	9.24118e+06	9.45821e+06	9.12277e+06
ptsh	b2415	[g]	9.1193	85		11822.6	12367.9	10513.7	8813.34	11642.6	12500	12981.5	10161.8	8577.66	10088.5	12600.7	13621	11578.6	10631.2	9729.18	6851.07	4110.68	11287.1	12316	10869	11896.1	8370.19	9040.48	1.00492e+06	1.05127e+06	893667	749134	989621	1.0625e+06	1.10343e+06	863754	729101	857520	1.07106e+06	1.15778e+06	984177	903648	826980	582341	349408	959399	1.04686e+06	923861	1.01117e+06
ptsi	b2416	[g]	63.561	575		3534.02	4039.52	4584.6	4348.65	3531.44	3604	4444.17	4835.51	4750.59	2584.28	2771.2	3197.4	3504.45	3624.02	3864.12	4137.87	4429.14	2877	3343.38	3592.82	3721.95	4033.65	4204.54	2.03206e+06	2.32272e+06	2.63615e+06	2.50048e+06	2.03058e+06	2.0723e+06	2.5554e+06	2.78042e+06	2.73159e+06	1.48596e+06	1.59344e+06	1.83851e+06	2.01506e+06	2.08381e+06	2.22187e+06	2.37928e+06	2.54676e+06	1.65428e+06	1.92244e+06	2.06587e+06	2.14012e+06
crr	b2417	[g]	18.251	169		25478.3	22333.9	19923.6	16503.4	25699.8	23850.4	21787.3	19849.1	17064.6	27200.4	25243.3	22461.3	19706.9	16736.6	15114.1	14212.7	9329.52	29515.2	21426.6	18054.9	16905.1	16272.4	14972.1	4.30583e+06	3.77443e+06	3.36709e+06	2.78907e+06	4.34327e+06	4.03072e+06	3.68205e+06	3.3545e+06	2.88392e+06	4.59687e+06	4.26611e+06	3.79596e+06	3.33047e+06	2.82848e+06	2.55429e+06	2.40195e+06	1.57669e+06	4.98808e+06	3.6211e+06	3.05127e+06	2.85697e+06
pdxk	b2418	[h]	30.847	283		158.905	169.313	158.843	181.061	136.866	185.588	172.525	180.305	174.499	114.748	111.19	126.509		120.841	129.951				129.353	125.449	115.105	127.308	136.745	44970.2	47915.7	44952.6	51240.2	38732.9	52521.5	48824.6	51026.4	49383.2	32473.6	31466.7	35802.1		34197.9	36776				36606.8	35502.2	32574.7
cysm	b2421	[e]	32.664	303		471.87	615.132	677.671	736.359	519.508	531.538	663.22	713.434	681.789	336.865	307.15	352.034	427.252	424.664	487.55	513.803	460.754	282.493	383.588	467.051	485.031	474.81	477.12	142977	186385	205334	223117	157411	161056	200956	216171	206582	102070	93066.4	106666	129457	128673	147728	155682	139608	85595.5	116227	141516	146964
cysa	b2422	[p]	41.058	365		441.35	603.368	560.403	684.89	437.089	542.64	618.08	697.152	659.592	201.691	227.414		383.39	380.802	371.987	405.125	343.934	197.414	368.73	464.245	439.899	393.895	415.55	161093	220229	204547	249985	159538	198064	225599	254460	240751	73617.4	83006.2		139937	138993	135775	147871	125536	72056.2	134586	169449	160563
cysw	b2423		32.537	291											45.7447					77.2917		71.2513																13311.7					22491.9		20734.1
cysp	b2425	[p]	37.614	338		2030.6	2201.24	1790.39	1824.82	1858.55	2136.07	2008.76	1722.35	1767.75	1215.83	1011.41	1031.71	1230.74	1024.48	1006.56	893.454	262.294	1217.86	1238.48	1110.88	1077.61	1776.59	820.66	686342	744020	605152	616788	628189	721991	678960	582153	597501	410951	341857	348719	415990	346273	340218	301988	88655.4	411637	418608	375477	364231
ucpa	b2426		27.85	263		753.664	666.433		321.14	772.348	177.906	681.648	180.936	141.157	1523.79	558.42	575.665		413.256		523.662		182.576	905.939	434.603	690.69	588.172	514.372	198214	175272		84459.7	203127	46789.3	179273	47586.1	37124.3	400756	146864	151400		108686		137723		48017.4	238262	114301	181651
murq	b2428		31.22	298											122.716																							36569.4
yfex	b2431		33.052	299		438.408	398.626	362.94	320.1	437.703	393.472	363.342	342.967	366.407	456.869	459.915	439.071	407.081	437.411	312.752	329.986	349.072	474.73	447.126	412.64	343.118	340.163	340.492	131084	119189	108519	95710	130873	117648	108639	102547	109556	136604	137515	131282	121717	130786	93512.9	98665.7	104372	141944	133691	123379	102592
yfey	b2432		20.897	191		10.467	8.40528	5.18345	5.09322	10.2251	8.98089	11.3649			12.7956								17.3664						1999.19	1605.41	990.039	972.805	1952.99	1715.35	2170.7			2443.97								3316.99
amia	b2435	[m]	31.412	289
yffs	b2450		29.751	269		146.09	142.186	113.15	95.7814	135.498					142.317		118.079	100.611			97.847		125.299	115.927	95.6158	90.8272	82.999	85.5943	39298.1	38248.1	30437.2	25765.2	36449					38283.3		31763.3	27064.3			26320.8		33705.5	31184.2	25720.6	24432.5
eutm	b2457		9.8654	97
maeb	b2463	[c]	82.416	759		5386.49	5088.41	3673.11	2120.88	5628.22	5589.06	4341.51	2999.83	2127.45	5705.1	6092.28	6012.68	6165.3	4688.68	3823.59	2994.62	1652.98	5266.55	5730.8	5193.14	4134.94	3229.12	2375.12	4.08835e+06	3.86211e+06	2.78789e+06	1.60975e+06	4.27182e+06	4.2421e+06	3.29521e+06	2.27687e+06	1.61473e+06	4.33017e+06	4.62404e+06	4.56362e+06	4.67946e+06	3.55871e+06	2.9021e+06	2.27292e+06	1.25461e+06	3.99731e+06	4.34968e+06	3.94159e+06	3.13842e+06
tala	b2464	[g]	35.658	316		1176.46	965.224	862.374	633.389	1196.31	976.775	864.924	714.622	616.852	1503.37	1294.69	764.982	559.788	347.595	268.118	218.628	176.944	1663.24	583.623	402.642	268.489	192.509	162.047	371760	305011	272510	200151	378035	308661	273316	225821	194925	475065	409123	241734	176893	109840	84725.2	69086.5	55914.3	525584	184425	127235	84842.4
tktb	b2465	[g]	73.042	667		929.783	695.529	717.296	514.926	872.604	755.594	682.897	617.881	542.003	995.621	853.074	540.461	410.222	296.143	191.521	133.199	105.917	1001.28	484.888	319.295	244.016	175.001	140.432	620165	463918	478437	343455	582027	503981	455492	412127	361516	664079	569000	360487	273618	197527	127745	88844	70646.8	667855	323420	212970	162758
yffb	b2471	[p]	13.6	118		60.085	53.4936																			43.3555			7090.03	6312.25																			5115.94
dape	b2472	[e]	41.269	375			36.4103	30.9891	38.6632	40.5953		29.7995	35.1968								33.3186					29.0786	33.373	31.5383		13653.9	11620.9	14498.7	15223.3		11174.8	13198.8								12494.5					10904.5
tmca	b2474		74.892	671					25.7099												25.7839				33.2187							17251.4												17301				22289.8
ypfj	b2475	[r]	31.46	287			45.0136	40.9252	38.3596	51.0561	43.3951	45.7721			43.6893									32.4335		26.4312	29.5957	27.668		12918.9	11745.5	11009.2	14653.1	12454.4	13136.6			12538.8									9308.41		7585.74
purc	b2476	[f]	26.995	237		7109.27	7095.38	7136.18	7509.02	7327.58	7409.5	7226.45	7197.91	7693.44	8409	9112.33	8764.68	8619.74	8123.74	8432.95	7789.2	7935.73	8480.58	8223.93	7925.12	7681.51	7858.95	7832.79	1.6849e+06	1.6816e+06	1.69128e+06	1.77964e+06	1.73664e+06	1.75605e+06	1.71267e+06	1.7059e+06	1.82335e+06	1.99293e+06	2.15962e+06	2.07723e+06	2.04288e+06	1.92533e+06	1.99861e+06	1.84604e+06	1.88077e+06	2.0099e+06	1.94907e+06	1.87825e+06	1.82052e+06
bamc	b2477		36.842	344		1292.94	1226.23	1216.19	1283.84	1209.37	1197.39	1208.5	1293.25	1348.46	1275.12	1235.36	1153.88	1129.34	1022.13	995.219	1132.56	1076.58	1421.34	1057.81	1051.4	1102.95	1044.87	1110.33	444772	421822	418368	441642	416024	411903	415725	444877	463872	438643	424966	396935	388493	351614	342355	389600	370345	488939	363887	361682	379414
dapa	b2478	[em]	31.27	292		1118.92	1178.78	1262.75	1209.02	1113.13	1212.81	1358.55	1272.38	1278.94	1025.5	1084.71	1266.92	1227.95	1165.49	1092.14	1098.69	1158.83	1159.6	1124.16	1121.09	1114.37	1088.25	1080.37	326725	344204	368723	353033	325035	354141	396696	371534	373449	299445	316736	369941	358560	340324	318905	320818	338378	338604	328254	327357	325395
gcvr	b2479		20.768	190
bcp	b2480	[o]	17.634	156		3933.42	4056.33	4059.33	4176.89	4015.87	4148.78	4270.94	3831.44	4086.74	3476.93	3411.17	3674.82	3435.4	3411.21	3483.61	3062.14	1845.93	3784.72	3648.3	3485.95	3548.25	3625.71	3176.24	613614	632788	633255	651595	626476	647210	666267	597705	637532	542402	532142	573272	535922	532149	543443	477693	287965	590417	569135	543809	553528
yfgc	b2494	[r]	53.907	487		257.433	193.595	134.733	120.953	230.842	203.706	153.451	148.503	153.663	237.525	228.515	182.954	126.807		115.168	81.075		222.483	184.616	138.533	113.273	156.018	81.1498	125370	94281	65614.8	58903.9	112420	99204.7	74730.8	72321.2	74834	115675	111287	89098.7	61754.9		56086.8	39483.5		108349	89908.1	67465.5	55163.8
yfgd	b2495	[p]	13.398	119		740.741	762.234	661.859	793.229	659.996	867.78	777.989	686.51	675.662	686.56				686	652.053		424.033		782.879	686.361	799.487	651.244	699.29	88148.1	90705.8	78761.3	94394.3	78539.5	103266	92580.7	81694.7	80403.8	81700.7				81634	77594.3		50459.9		93162.6	81676.9	95139
uraa	b2497	[f]	45.06	429			117.961		135.326	91.0661			120.507				124.23	144.959	152.766	138.762	106.717			128.2	141.158	134.055		110.471		50605.5		58054.8	39067.3			51697.7				53294.6	62187.6	65536.5	59528.8	45781.6			54997.7	60556.8	57509.4
upp	b2498	[f]	22.533	208		4985.13	7240.82	8497.72	9683.95	5023.44	6386.22	8038.7	9172.85	10116.5	4758.15	5869.47	8213.72	10470.9	11412.1	12893.6	11574.6	11888.2	4897.38	9036.49	10456.4	11361.5	11646.9	11539.9	1.03691e+06	1.50609e+06	1.76753e+06	2.01426e+06	1.04487e+06	1.32833e+06	1.67205e+06	1.90795e+06	2.10424e+06	989695	1.22085e+06	1.70845e+06	2.17794e+06	2.37371e+06	2.68187e+06	2.40751e+06	2.47274e+06	1.01866e+06	1.87959e+06	2.17493e+06	2.3632e+06
purm	b2499	[f]	36.854	345		937.309	1006.45	1273.28	1537.22	861.327	931.02	1081.33	1361.48	1614.63	930.134	1031.66	1155.41	1390.28	1569.88	1811.35	1866.62	2189.86	998.377	1222.04	1516.86	1689.75	1858.21	2035.27	323372	347227	439281	530341	297158	321202	373059	469712	557047	320896	355922	398618	479645	541607	624915	643983	755500	344440	421603	523318	582963
purn	b2500	[f]	23.238	212			104.965	91.9419	125.721		95.6264	79.3941	111.249		95.3759	125.142	129.504	100.234	112.904	95.6478	106.816			87.9487	117.089	93.0237	117.498	115.558		22252.5	19491.7	26652.8		20272.8	16831.6	23584.9		20219.7	26530.1	27454.8	21249.6	23935.7	20277.3	22644.9			18645.1	24822.9	19721
ppk	b2501	[p]	80.431	688		37.2916	30.2379	26.3884	26.1446	37.8778	29.9439	28.6808	32.1479	30.196	28.917	32.0911	30.768				30.3066				24.5522	25.2287	23.2395		25656.6	20803.7	18155.2	17987.5	26059.9	20601.4	19732.4	22117.7	20774.9	19894.9	22078.7	21168.4				20851				16891.9	17357.4
ppx	b2502		58.135	513						18.7614			20.2897																				9624.6			10408.6
guaa	b2507	[f]	58.679	525		1227.17	1678.62	1978.16	2463.6	1276.13	1558.58	1816.44	2239.35	2552.1	1430.91	1640.88	2137.52	2708.6	3002.46	3274.35	3667.43	4397.69	1536.01	2322.86	2916.72	3184.4	3484.82	3749.08	644262	881276	1.03853e+06	1.29339e+06	669970	818253	953631	1.17566e+06	1.33985e+06	751227	861463	1.1222e+06	1.42202e+06	1.57629e+06	1.71903e+06	1.9254e+06	2.30879e+06	806404	1.2195e+06	1.53128e+06	1.67181e+06
guab	b2508	[f]	52.022	488		2085.43	2731.39	3193.93	3854.83	2038.16	2536.02	3080.99	3582.1	4013.78	2524.77	3021.03	3332.03	4096.3	4583.17	4797.41	5237.25	5969.37	2673.78	3628.67	4094.92	4368.77	4816.35	5173.36	1.01769e+06	1.33292e+06	1.55864e+06	1.88116e+06	994620	1.23758e+06	1.50352e+06	1.74807e+06	1.95872e+06	1.23209e+06	1.47426e+06	1.62603e+06	1.999e+06	2.23659e+06	2.34114e+06	2.55578e+06	2.91305e+06	1.3048e+06	1.77079e+06	1.99832e+06	2.13196e+06
der	b2511	[r]	55.035	490		351.08	336.409	317.412	313.76	334.235	336.03	318.582	335.487	334.999	324.456	321.792	325.623	313.138	343.798	286.751	279.943	281.703	347.419	316.321	319.527	289.853	293.486	296.08	172029	164840	155532	153742	163775	164654	156105	164389	164150	158983	157678	159555	153437	168461	140508	137172	138034	170235	154997	156568	142028
bamb	b2512		41.887	392		483.129	512.489	482.862	498.29	480.953	461.975	465.925	467.553	492.953	531.801	517.039	509.715	504.504	511.695	525.676	520.973	582.512	583.779	525.231	518.148	553.71	538.705	546.001	189386	200896	189282	195330	188534	181094	182642	183281	193238	208466	202679	199808	197765	200584	206065	204221	228345	228841	205891	203114	217054
yfgm	b2513	[s]	22.176	206		662.07	673.284	671.496	671.599	711.381	591.912	647.638	727.585	729.311	592.243	668.445	669.785	663.755	630.472	671.183	688.354	745.538	723.905	676.767	653.102	684.639	645.823	660.994	136386	138697	138328	138349	146544	121934	133414	149883	150238	122002	137700	137976	136734	129877	138264	141801	153581	149124	139414	134539	141036
hiss	b2514	[j]	47.029	424		955.394	868.858	928.077	854.98	848.621	898.06	888.125	929.473	903.871	848.696	943.275	982.352	1035.51	929.511	951.127	993.138	1001.38	955.218	965.628	944.025	973.667	947.243	1076.62	405087	368396	393505	362511	359815	380778	376565	394097	383241	359847	399949	416517	439055	394113	403278	421091	424585	405013	409426	400266	412835
ispg	b2515	[i]	40.683	372		540.448	538.313	509.936	473.529	511.318	506.097	534.951	494.558	509.382	505.984	476.274	493.522	473.391	432.976	484.093	459.864	497.624	500.459	505.141	466.846	456.157	447.678	438.256	201047	200253	189696	176153	190210	188268	199002	183975	189490	188226	177174	183590	176102	161067	180083	171070	185116	186171	187912	173667	169691
rodz	b2516		36.191	337		728.917	683.665	617.055	528.351	793.075	706.095	654.831	573.807	540.648	745.687	635.093	672.057	566.062	459.757	448.775	457.98	471.281	722.449	554.898	552.865	525.932	453.796	486.578	245645	230395	207948	178054	267266	237954	220678	193373	182198	251297	214026	226483	190763	154938	151237	154339	158822	243465	187001	186316	177239
rlmn	b2517		43.085	384		102.151	145.115	172.692	177.286		138.276	157.61	157.648	139.921	154.129		206.535	313.08			190.316		63.5672	183.237	227.143	239.694	203.016	174.517	39225.9	55724.2	66313.7	68077.9		53097.9	60522.2	60536.7	53729.6	59185.6		79309.6	120223			73081.5		24409.8	70362.9	87223	92042.4
ndk	b2518	[f]	15.463	143		18957.9	24221.6	23955.4	15058.4	20143.6	21390.7	26330.6	20198.4	15583.2	23532	26719.6	34206.4	36201.8	34784.2	31621.9	25194.3	15943.7	22817.3	33144.9	36002.6	32319	28421	21840.2	2.71098e+06	3.46368e+06	3.42562e+06	2.15335e+06	2.88053e+06	3.05887e+06	3.76527e+06	2.88837e+06	2.2284e+06	3.36507e+06	3.8209e+06	4.89152e+06	5.17686e+06	4.97415e+06	4.52194e+06	3.60279e+06	2.27995e+06	3.26288e+06	4.73973e+06	5.14838e+06	4.62162e+06
yfhm	b2520	[r]	181.58	1653					20.2399											17.6922				8.97069	8.38202	24.3233		13.1074				33456.5											29245.2				14828.5	13855.5	40206.5
ssea	b2521		30.811	281		462.758	433.747	321.072	183.268	522.253	448.318	334.161	303.717	213.96	639.846	631.001	440.008	382.59	239.112	237.689	174.132		655.065	448.864	354.748	264.472	224.843	190.076	130035	121883	90221.3	51498.3	146753	125977	93899.2	85344.5	60122.6	179797	177311	123642	107508	67190.6	66790.5	48931.1		184073	126131	99684.2	74316.7
sseb	b2522		28.642	258
pepb	b2523		46.18	427		2044.84	2067.69	1834.59	1518.28	2211.15	2047.54	1943.73	1657.61	1539.57	2079.67	2219.6	2217.08	2309.14	2049.14	1936.26	1852.92	1538.92	1622.84	2303.13	2169.96	2003.4	1848.16	1573.26	873147	882904	783371	648304	944159	874301	829973	707800	657395	888021	947769	946694	986003	874985	826782	791196	657120	692952	983437	926573	855454
iscx	b2524		7.7315	66
fdx	b2525	[c]	12.331	111		596.479	617.318	591.406	582.509	634.435	657.765	623.925	541.514	656.437	632.395	652.843	659.147	625.047	576.553	667.3	603.77		610.931	628.193	640.198	636.016	740.284	651.831	66209.2	68522.3	65646.1	64658.5	70422.3	73011.9	69255.7	60108.1	72864.5	70195.8	72465.6	73165.3	69380.2	63997.3	74070.3	67018.4		67813.3	69729.4	71061.9	70597.8
hsca	b2526	[o]	65.652	616		173.135	175.987	167.138	188.272	146.778	177.323	174.282	151.074	180.09	162.868	151.371	154.973	172.204	211.392	168.268	198.067	190.613	141.807	177.1	184.378	176.108	201.461	180.909	106651	108408	102957	115976	90415	109231	107358	93061.8	110936	100326	93244.6	95463.2	106078	130218	103653	122009	117417	87353.1	109094	113577	108483
hscb	b2527	[o]	20.137	171		95.5319	219.964	252.159	262.707			267.887	238.091		203.121	226.821								237.452	134.886	195.501		169.813	16335.9	37613.9	43119.2	44922.8			45808.7	40713.5		34733.7	38786.3								40604.3	23065.6	33430.7
isca	b2528	[s]	11.556	107		721.008	727.125	854.655	829.137	786.995	724.806	736.895	702.021		671.524			681.321	605.636		596.022	435.704		780.972	847.303	764.556	769.034	871.492	77147.9	77802.4	91448.1	88717.7	84208.5	77554.3	78847.7	75116.3		71853.1			72901.4	64803.1		63774.3	46620.3		83564	90661.4	81807.5
iscu	b2529	[c]	13.848	128		6804.38	6586.47	6150.81	5298.51	6942.12	6120.98	6207.73	5591.18	4948.96	4967.71	5610.81	5432.43	5213.51	4621.05	4302.1	4072.57	3140.64	5336.41	5468.59	5036.38	4646.49	4812.01	3936.93	870961	843068	787304	678210	888591	783485	794589	715671	633466	635867	718184	695351	667329	591495	550669	521289	402002	683061	699979	644657	594751
iscs	b2530		45.089	404		6648.17	6676.43	6045.46	5297.56	6679.11	6597.1	6044.1	5617.57	5228.53	5678.62	5698.01	5648.56	5567.03	4669.2	4508.11	4408.62	4409.36	6335.78	5519.32	5183.3	4390.35	4469.37	3891.93	2.68586e+06	2.69728e+06	2.44237e+06	2.14021e+06	2.69836e+06	2.66523e+06	2.44182e+06	2.2695e+06	2.11233e+06	2.29416e+06	2.30199e+06	2.28202e+06	2.24908e+06	1.88636e+06	1.82128e+06	1.78108e+06	1.78138e+06	2.55966e+06	2.2298e+06	2.09405e+06	1.7737e+06
iscr	b2531	[k]	17.336	162		2154.86	1774.73	1650.96	1493.75	2145.85	2000.56	1809.88	1337.83	1399.21	1936.87	1827.84	1880.7	1578.05	1582.92	1532.24	1135.32	1057.05	2282.56	1904.03	1669.64	1483.58	1188.88	1017.98	349087	287506	267455	241988	347628	324091	293201	216729	226671	313773	296110	304674	255644	256433	248223	183922	171242	369775	308452	270482	240340
trmj	b2532		27.048	246		192.351	227.379	223.504	268.845	230.996	207.346	226.608	279.747	282.158	183.405	210.363	198.266	240.624	312.298	290.041	252.62	311.753		229.617	250.029	266.755	244.602	298.473	47318.3	55935.1	54982	66135.8	56824.9	51007	55745.7	68817.7	69410.9	45117.7	51749.4	48773.5	59193.4	76825.2	71350.1	62144.5	76691.3		56485.9	61507.1	65621.8
suhb	b2533	[g]	29.172	267		565.261	766.158	829.647	973.572	517.719	628.735	756.393	852.986	866.723	487.428	618.215	836.815	885.273	965.453	1127.18	1216.67	1183.78	553.778	815.818	927.96	1036.48	1184.26	1175.74	150925	204564	221516	259944	138231	167872	201957	227747	231415	130143	165063	223429	236368	257776	300958	324851	316068	147859	217824	247765	276741
glya	b2551	[e]	45.316	417		8525.76	9146.42	9239.59	10260.8	8553.9	8931.64	9063.7	9795.87	10706.6	7652.27	8172.97	8531.44	9168.4	9286.22	9568.54	9704.51	11290.5	8575.13	8873.34	9284.59	9199.68	9695.84	10395.6	3.55524e+06	3.81406e+06	3.85291e+06	4.27877e+06	3.56698e+06	3.72449e+06	3.77956e+06	4.08488e+06	4.46463e+06	3.191e+06	3.40813e+06	3.55761e+06	3.82322e+06	3.87235e+06	3.99008e+06	4.04678e+06	4.70814e+06	3.57583e+06	3.70018e+06	3.87167e+06	3.83627e+06
hmp	b2552	[c]	43.867	396												28.1176								32.2996	28.3484														11134.6								12790.6	11225.9
glnb	b2553	[e]	12.425	112		1878.29	1933.45	1872.45	1831.23	1874.42	1904.14	1844.51	1807.55	1957.64	1696.54	1813.3	1913.85	1620.88	1860.94	1956.86	1863.85	1678.17	1725.15	1917.37	1796.23	1887.62	1794.54	1728.64	210369	216547	209714	205098	209935	213264	206586	202445	219255	190013	203090	214351	181538	208426	219169	208751	187955	193217	214745	201178	211413
purl	b2557	[f]	141.4	1295		700.262	733.622	780.85	905.418	679.15	745.169	742.825	878.594	915.02	718.079	793.056	821.874	890.642	986.921	900.672	1031.96	1168.2	776.02	859.663	936.499	942.263	1004.78	1110.52	906840	950040	1.0112e+06	1.17252e+06	879499	964993	961959	1.13778e+06	1.18495e+06	929912	1.02701e+06	1.06433e+06	1.15338e+06	1.27806e+06	1.16637e+06	1.33638e+06	1.51282e+06	1.00495e+06	1.11326e+06	1.21277e+06	1.22023e+06
pdxj	b2564	[h]	26.384	243		691.818	726.322	602.886	604.17	696.768	689.14	677.069	657.498	605.77	689.641	651.656	617.524	593.989	529.876	567.406	546.321	544.115	654.045	601.653	600.633	534.138	514.04	486.778	168112	176496	146501	146813	169315	167461	164528	159772	147202	167583	158352	150058	144339	128760	137880	132756	132220	158933	146202	145954	129796
rnc	b2567	[k]	25.55	226		396.714	375.269	411.536	407.396	336.61	383.327	399.731	423.87	457.836	294.553		358.267	380.351	383.907	373.306			323.208	432.869	376.912	417.069	394.571	413.978	89657.3	84810.9	93007.1	92071.5	76073.8	86632	90339.1	95794.7	103471	66569		80968.4	85959.4	86763.1	84367.2			73045	97828.4	85182.2	94257.6
lepb	b2568	[u]	35.96	324		179.854	185.63	179.754	173.494	177.615	176.829	185.597	184.226	173.319	197.632	218.306	170.89	218.711	166.18	156.359	164.262	140.613	232.989	181.288	174.885	170.508	151.149	177.264	58272.8	60144.1	58240.3	56212.2	57547.1	57292.7	60133.5	59689.2	56155.3	64032.7	70731.3	55368.4	70862.4	53842.2	50660.3	53220.8	45558.8	75488.4	58737.4	56662.6	55244.6
lepa	b2569	[m]	66.57	599		463.994	471.753	481.217	480.661	435.128	524.692	468.446	473.748	501.98	498.101	499.148	495.487	485.564	530.05	508.377	503.627	514.664	502.9	517.578	532.359	524.052	494.429	552.218	277933	282580	288249	287916	260642	314290	280599	283775	300686	298362	298990	296797	290853	317500	304518	301672	308284	301237	310029	318883	313907
rseb	b2571	[t]	35.749	318
rsea	b2572	[t]	24.321	216
rpoe	b2573	[k]	21.695	191			108.318	109.436	90.0168	146.38	105.129	96.5409	83.7536		94.9413						89.2938			88.2221						20688.7	20902.4	17193.2	27958.6	20079.6	18439.3	15996.9		18133.8						17055.1			16850.4
nadb	b2574	[h]	60.337	540											26.1302											57.839	49.3171	46.3327										14110.3											31233.1
srmb	b2576	[lkj]	49.914	444		117.98	136.55	121.225	112.635	117.685	114.791	121.107	105.945		108.485		111.7		116.861	92.7478				111.517	86.9996	105.697	87.6916	89.4349	52383	60628	53823.9	50010	52252.3	50967.3	53771.5	47039.7		48167.2		49594.8		51886.2	41180				49513.5	38627.8	46929.4
yfid	b2579	[r]	14.284	127		1710.82	1329.37	1683.67	1629.54	1662.38	1265.38	1281.85	1325.77	1191.37	2368.8	1858.84	969.576	1062.77	1405.55	990.565	2215.2	2401.14		2110.21	2411.79	3214.1	2413.07	3902.05	217275	168830	213827	206952	211123	160703	162795	168373	151304	300838	236073	123136	134972	178505	125802	281330	304945		267997	306298	408191
ung	b2580	[l]	25.693	229		114.92	111.28	112.852	103.975	209.082	118.853	107.806	107.375	101.266	94.375			173.58						110.922	87.8153	100.188	105.38	93.7802	26316.6	25483.1	25843.1	23810.2	47879.7	27217.3	24687.7	24588.9	23190	21611.9			39749.8						25401.2	20109.7	22943.1
yfif	b2581	[j]	37.784	345		374.851	319.528	273.381	283.133	354.196	328.251	298.251	279.898	293.696	279.067		268.087	335.109	313.322	273.375				253.033	269.027	234.165	222.481	262.45	129323	110237	94316.4	97680.8	122198	113247	102897	96564.9	101325	96278.2		92490.2	115613	108096	94314.4				87296.3	92814.4	80786.9
trxc	b2582	[oc]	15.555	139		189.405	182.726	164.658	135.345	183.141	175.282	306.867			177.913				228.496					196.443	168.33	167.128	192.015	163.899	26327.2	25398.9	22887.5	18813	25456.5	24364.2	42654.5			24729.9				31761					27305.6	23397.9	23230.8
pka	b2584		97.986	886		15.9483									37.2813									11.5296					14130.2									33031.3									10215.2
pssa	b2585		52.801	451		369.509	320.786	259.351	180.289	386.669	346.398	278.204	213.844	245.251	433.155	403.988	347.368	315.839	246.444	192.203	207.995		312.669	308.105	289.198	227.049	214.663	204.818	166649	144674	116967	81310.2	174388	156226	125470	96443.8	110608	195353	182198	156663	142443	111146	86683.6	93805.5		141014	138955	130429	102399
kgtp	b2587	[gepr]	47.052	432		402.174	309.614	215.236	163.154	309.532	315.628	212.958	165.377	128.483	265.313	242.312	239.179	123.408	160.848				188.747	183.058	90.9147	128.307	135.509	113.561	173739	133753	92981.9	70482.6	133718	136351	91998	71443	55504.7	114615	104679	103325	53312.2	69486.5				81538.6	79081	39275.1	55428.5
clpb	b2592	[o]	95.584	857		1899.44	1748.18	1613.28	1361.37	2002.55	1802.23	1681	1595.85	1448.73	2021.74	2040.65	1887.24	1684.93	1566.31	1338.16	1269.2	1187.02	2080.11	1644.46	1644.16	1434.5	1283.87	1235.21	1.62782e+06	1.49819e+06	1.38258e+06	1.16669e+06	1.71619e+06	1.54451e+06	1.44061e+06	1.36764e+06	1.24156e+06	1.73263e+06	1.74884e+06	1.61736e+06	1.44399e+06	1.34233e+06	1.1468e+06	1.0877e+06	1.01728e+06	1.78265e+06	1.4093e+06	1.40905e+06	1.22937e+06
yfih	b2593	[s]	26.339	243					17.9963																							4373.1
rlud	b2594	[j]	37.121	326		152.187	180.329	186.471	214.18	336.924	186.342	198.922	215.057	204.198	252.75				242.935					196.915	242.004	214.279	234.688	227.2	49612.8	58787.3	60789.5	69822.7	109837	60747.4	64848.7	70108.7	66568.4	82396.5				79196.7					64194.3	78893.5	69855
bamd	b2595		27.829	245		890.236	956.354	1048.01	1073.83	911.328	954.623	994.978	1088.73	1132.8	1001.89	1097.65	1210.9	1205.87	1201.89	1200.76	1131.55	1250.79	1039.51	1145.61	1214.21	1257.48	1178.37	1215.84	218108	234307	256762	263088	223275	233883	243770	266738	277535	245463	268923	296670	295438	294464	294186	277229	306444	254679	280675	297481	308082
raia	b2597		12.784	113		2331.16	1658.79	1318.59		2455.25	2180.65	1645.34	969.342	1004.06	2320.26	2728.44	2612.6	1635.71	1498	903.093	479.511	351.188	2329.15	2295.71	1708.9	1276.3	895.747	824.307	263422	187444	149001		277443	246413	185924	109536	113458	262190	308314	295223	184835	169274	102050	54184.7	39684.3	263194	259416	193105	144222
phea	b2599	[e]	43.111	386		3276.89	2479.83	1798.04	1317.67	3349.27	2826.87	1995.24	1455.74	1288.76	2052.85	1940.05	1577.81	1306.12	944.11	705.661	673.402	530.307	1793.25	1369.1	1047.73	797.511	655.811	657.74	1.26488e+06	957213	694045	508622	1.29282e+06	1.09117e+06	770164	561916	497462	792401	748859	609034	504164	364427	272385	259933	204699	692195	528474	404425	307839
tyra	b2600	[e]	42.042	373		219.988	242.491	406.368	549.701	223.646	240.167	310.619	495.31	545.751	83.2255	92.5359	90.058		101.408	80.0129	84.8298			85.3869	97.1138	92.9577	69.2183	64.1335	82055.5	90449	151575	205039	83419.8	89582.3	115861	184750	203565	31043.1	34515.9	33591.7		37825.2	29844.8	31641.5			31849.3	36223.4	34673.2
arof	b2601	[e]	38.804	356		389.272	421.403	550.309	732.349	385.994	421.016	395.288	620.337	741.555	87.1322	110.67		112.524	127.102	304.573	130.181			117.836	95.0275	95.3219	72.8107	127.695	138581	150019	195910	260716	137414	149882	140723	220840	263994	31019.1	39398.4		40058.7	45248.5	108428	46344.4			41949.7	33829.8	33934.6
rpls	b2606	[j]	13.133	115		12720.7	15524.5	18522	20397.3	12471.8	13724.8	16657	19649.5	20753.4	12031.3	12713	15706.8	18952.3	21867.9	24110.4	26871.7	27493.6	12637.9	17565.4	21065.1	23951.6	24249.6	26235.3	1.46289e+06	1.78532e+06	2.13003e+06	2.34569e+06	1.43426e+06	1.57835e+06	1.91556e+06	2.25969e+06	2.38665e+06	1.38359e+06	1.462e+06	1.80628e+06	2.17951e+06	2.51481e+06	2.7727e+06	3.09024e+06	3.16176e+06	1.45336e+06	2.02002e+06	2.42249e+06	2.75444e+06
rimm	b2608		20.605	182		309.88	378.555	385.011	373.964	331.286	319.222	370.088	349.612	389.065	330.061	321.125	365.584	408.516	374.996	429.281	450.341	505.424	376.042	385.735	355.233	411.663	453.747	464.237	56398.2	68897	70072	68061.4	60294	58098.4	67356.1	63629.4	70809.9	60071.2	58444.8	66536.3	74349.9	68249.3	78129.1	81962	91987.2	68439.6	70203.7	64652.4	74922.7
rpsp	b2609	[j]	9.1904	82		18101	21812.8	25446.6	27829.4	18484.6	19309.1	24268.3	27071.3	28418.5	17825.4	18821	23685.1	26922.8	30329	33245.3	35340.4	39076.8	18761.8	26065.3	30270.7	34179	35341.4	37385.7	1.48428e+06	1.78865e+06	2.08662e+06	2.28201e+06	1.51573e+06	1.58334e+06	1.99e+06	2.21985e+06	2.33031e+06	1.46168e+06	1.54332e+06	1.94218e+06	2.20767e+06	2.48698e+06	2.72611e+06	2.89791e+06	3.2043e+06	1.53846e+06	2.13736e+06	2.4822e+06	2.80268e+06
ffh	b2610	[u]	49.787	453		487.844	501.33	532.637	571.385	499.194	497.504	536.082	535.66	598.709	477.211	532.634	539.859	607.673	577.914	572.431	618.374	665.263	554.451	572.778	641.525	601.135	593.307	637.768	220994	227103	241285	258838	226135	225369	242845	242654	271215	216177	241283	244556	275276	261795	259311	280123	301364	251166	259468	290611	272314
grpe	b2614	[o]	21.798	197		3986.92	4090.13	3841.2	3963.94	4130.24	4112.01	3898.8	3892.36	3962.98	4052.45	4016.75	4125.73	4472.85	4038.48	4267.35	4028.33	4218.66	3956.25	4030.45	4255.92	4216.92	3989.94	3942.55	785422	805755	756715	780897	813656	810066	768063	766794	780707	798334	791300	812768	881152	795581	840669	793581	831076	779381	793998	838416	830732
bame	b2617		12.302	113												195.855	209.239																						22131.6	23644
smpb	b2620	[o]	18.269	160		214.029	225.808	238.39	490.458	208.161	123.352	112.375												169.579		177.174	183.033	187.239	34244.6	36129.4	38142.4	78473.3	33305.8	19736.4	17979.9												27132.7		28347.8
csid	b2659		37.36	325											698.946	311.135	297.545							1197.5														227158	101119	96702.2							389189
gabd	b2661	[c]	51.719	482		2087.46	1764.66	1235	797.067	1995.41	1824.36	1379.19	947.905	711.038	2395.39	1815.58	1999.67	1991.88	1144.83	579.858	422.463	359.068	1727.19	2173.29	1623.21	909.455	523.469	362.965	1.00616e+06	850566	595268	384186	961786	879342	664770	456890	342720	1.15458e+06	875110	963843	960087	551807	279492	203627	173071	832506	1.04753e+06	782387	438357
gabt	b2662	[e]	45.774	426		1019.19	1024.7	698.433	354.079	1231.11	976.798	838.856	462.392	347.986	1392.4	1782.52	1610.6	1155.82	586.206	285.683	158.537		1239.44	1392.9	1013.41	415.32	253.188	167.439	434174	436524	297533	150838	524451	416116	357353	196979	148242	593164	759352	686116	492381	249724	121701	67536.9		528003	593375	431711	176927
ygau	b2665	[s]	16.063	149		13971.1	8575.15	6468.44	4157.62	13563.7	10201.5	7004.14	5178.35	3955.74	16022.8	12893.9	7808.28	4871.37	2962.63	1838.62	1334.02	1203.16	18174.2	6055.18	3559.27	2283.12	1438.72	1135.89	2.08169e+06	1.2777e+06	963798	619486	2.02099e+06	1.52003e+06	1.04362e+06	771575	589405	2.3874e+06	1.92118e+06	1.16343e+06	725834	441432	273954	198768	179270	2.70795e+06	902222	530331	340185
stpa	b2669	[r]	15.347	134		1707.81	2273.76	2756.31	4342.83	1824.61	2172.73	2584.51	3863.33	4587.6	1036.53	1195.87	1625.3	1860.77	2097.18	2443.82	2648.14	2802.06	1037.54	1665.14	1965.87	2293.69	2412.34	2648.63	228847	304683	369345	581939	244498	291146	346324	517686	614739	138895	160247	217790	249343	281022	327472	354851	375476	139030	223129	263427	307355
ygam	b2672		12.288	113		858.87	634.821	523.831	339.942	696.595	604.559				130.531	685.63		399.48	262.576		132.354		826.757	484.055		188.025	118.082	74.4763	97052.3	71734.8	59192.9	38413.4	78715.2	68315.1				14750	77476.2		45141.2	29671.1		14956		93423.6	54698.2		21246.9
prox	b2679	[e]	36.022	330		58.0974	79.0403	76.6143		60.0385		77.111	76.2508	72.821		34.2469									76.1289		118.989	55.4764	19172.1	26083.3	25282.7		19812.7		25446.6	25162.7	24030.9		11301.5									25122.6
mpra	b2684	[k]	20.563	176		311.06	585.986	544.855	715.995	293.271	403.549	519.855	592.506	686.808	260.133	198.239	466.223	561.139	717.375	592.84	676.681	858.224		447.089	617.2	766.159	761.347	841.698	54746.5	103133	95894.5	126015	51615.7	71024.6	91494.5	104281	120878	45783.5	34890.1	82055.2	98760.5	126258	104340	119096	151048		78687.7	108627	134844
emra	b2685	[v]	42.736	390		92.6707	61.3546	72.9638	91.1925	51.6625		70.2008	104.533	107.447	33.0322									40.6744	51.1905	69.9928	89.7738	88.0869	36141.6	23928.3	28455.9	35565.1	20148.4		27378.3	40768	41904.5	12882.6									15863	19964.3	27297.2
luxs	b2687	[t]	19.416	171		4234.07	4073.92	4145.07	4402.87	4112.52	3780.04	4051.36	4157.67	4379.06	3459.72	3384.43	3189.46	3032.96	2786.04	2617.33	2557.38	2662.85	3785.35	3211.85	3045.56	2759.46	2657.97	2684.29	724026	696641	708807	752890	703242	646386	692783	710961	748819	591611	578738	545398	518636	476413	447563	437313	455348	647295	549226	520791	471868
gsha	b2688	[h]	58.269	518		113.934	111.879	106.139	114.416	104.358	114.786	109.1	101.771	107.911	113.917	125.805		124.225		123.231		74.2571	200.727	96.0091	110.232	89.3118	80.2499	89.4742	59017.9	57953.2	54979.8	59267.6	54057.6	59459.2	56513.8	52717.2	55897.9	59008.9	65167.1		64348.7		63833.4		38465.2	103976	49732.7	57100.3	46263.5
yqab	b2690	[r]	20.78	188
csra	b2696	[t]	6.8558	61		3391.92	3168.92	3417.13	3130.67	3534.22	3177.28	3388.53	2908	2958.11	3746.97	3792.53	3937.07	3684.8	3236.23	2857.77		1831.95	5363.99	3395.89	3578.7	2802.96	2657.3	3221.68	206907	193304	208445	190971	215588	193814	206700	177388	180445	228565	231345	240161	224773	197410	174324		111749	327203	207150	218301	170981
alas	b2697	[j]	96.031	876		1206.1	1269.13	1232.1	1367.85	1190.44	1227.29	1234	1307.57	1443.55	1276.61	1298.78	1350.16	1399.46	1432.85	1387.8	1466.66	1679.5	1398.94	1363.07	1445.88	1390.68	1399.77	1482.3	1.05654e+06	1.11176e+06	1.07932e+06	1.19823e+06	1.04282e+06	1.0751e+06	1.08098e+06	1.14543e+06	1.26455e+06	1.11831e+06	1.13773e+06	1.18274e+06	1.22593e+06	1.25518e+06	1.21571e+06	1.28479e+06	1.47124e+06	1.22547e+06	1.19405e+06	1.26659e+06	1.21824e+06
reca	b2699	[l]	37.973	353		2187.03	2158.37	1973.88	1775.72	2243.38	2231.06	2161.39	1877.68	1811.41	2339.3	2407.31	2309.29	2354.46	2280.31	1988.85	1856.35	1584.86	2561.59	2269.99	2207	1959.15	1765.62	1692.61	772020	761904	696779	626828	791912	787564	762971	662822	639426	825773	849780	815181	831126	804948	702064	655292	559457	904240	801305	779070	691578
ygad	b2700	[r]	17.582	165											245.578												127.213											40520.4
gutq	b2708	[m]	34.031	321			179.004			184.497		110.075												142.214						57460.4			59223.5		35334.1												45650.8
rpos	b2741	[k]	37.971	330		142.47	118.957	105.56	103.92	148.992	124.101	106.745	106.533	99.8276	130.744	111.301	109.798	85.7004	81.7246		46.7457		144.539	104.775	70.2898	68.3501	43.2774	45.3163	47015	39255.8	34834.8	34293.6	49167.5	40953.2	35225.8	35156	32943.1	43145.7	36729.3	36233.2	28281.1	26969.1		15426.1		47697.9	34575.6	23195.6	22555.5
nlpd	b2742	[m]	40.149	379		66.2636	61.093	67.219	70.5967	70.4298		64.2159			81.1097						69.178			75.6291	71.4507	70.1315	68.203	72.1636	25113.9	23154.2	25476	26756.1	26692.9		24337.8			30740.6						26218.5			28663.4	27079.8	26579.8
pcm	b2743		23.257	208
trud	b2745	[s]	39.091	349		56.5579	53.9587		49.6399	58.4946					61.7689		58.3472	55.2984			61.1785		55.6021	53.6281	64.0312	60.0095	54.3167	69.4718	19738.7	18831.6		17324.3	20414.6					21557.4		20363.2	19299.2			21351.3		19405.1	18716.2	22346.9	20943.3
ispf	b2746	[i]	16.897	159		1084.1	869.529	766.765		1145.13	789.627	903.106	734.845	801.819			1035.66	986.308	854.155				967.982	1033.88	1021.65		901.542	837.862	172372	138255	121916		182076	125551	143594	116840	127489			164669	156823	135811				153909	164387	162442
cysc	b2750	[p]	22.321	201		157.292	250.096	303.86	370.133	156.036	199.191	257.527	292.021	294.845	74.686	85.8938	124.69	161.62	168.574					156.679	182.01	154.818	164.629	187.094	31615.7	50269.4	61075.9	74396.7	31363.3	40037.4	51763	58696.3	59263.9	15011.9	17264.7	25062.7	32485.6	33883.3					31492.4	36584	31118.5
cysn	b2751	[p]	52.558	475		841.786	1108.81	1394.71	1617.89	842.794	1000.71	1257.79	1433.95	1524.88	356.966	427.2	550.943	665.37	655.531	704.631	682.224	651.849	444.762	652.829	728.824	740.344	691.527	758.958	399848	526684	662489	768499	400327	475339	597451	681125	724319	169559	202920	261698	316051	311377	334700	324057	309628	211262	310094	346192	351663
cysd	b2752	[eh]	35.188	302		819.224	1105.33	1376.85	1648.69	810.564	965.859	1206.57	1553.55	1671.22	393.542	426.197	528.048	650.876	666.03	738.542	736.701	795.623	385.865	673.006	740.284	817.821	777.769	874.689	247406	333808	415810	497904	244790	291689	364385	469173	504708	118850	128711	159470	196564	201141	223040	222484	240278	116531	203248	223566	246982
cysh	b2762	[eh]	27.975	244		493.592	581.883	673.492	775.237	525.458	597.191	639.643	693.203	742.203	273.35	313.531	349.816	431.845	435.144	483.31	414.462	354.846	328.303	405.459	444.521	446.834	396.851	407.96	120436	141979	164332	189158	128212	145715	156073	169141	181097	66697.4	76501.6	85355.1	105370	106175	117928	101129	86582.5	80106	98932	108463	109028
cysi	b2763	[p]	63.997	570		1202.48	1466.46	1591.72	1764.63	1178.35	1347.47	1551.57	1743.63	1793.45	608.272	648.912	778.516	946.701	1070.58	1048.77	988.895	922.628	759.786	965.062	1124.65	1120.95	1014.87	1084.33	685415	835883	907280	1.00584e+06	671662	768056	884396	993868	1.02227e+06	346715	369880	443754	539620	610232	597797	563670	525898	433078	550085	641049	638940
cysj	b2764	[p]	66.269	599		978.581	1307.98	1632.61	2022.29	975.279	1158.9	1455.36	1851.92	2077.04	477.873	553.144	713.196	894.631	1038.6	1263.22	1269.36	1165.69	456.038	903.845	1045.36	1275.98	1243.6	1313.36	586170	783483	977930	1.21135e+06	584192	694179	871760	1.1093e+06	1.24415e+06	286246	331333	427205	535884	622122	756670	760349	698250	273167	541403	626170	764313
qued	b2765		13.773	121					69.138																56.8659			62.1737				8365.7																6880.77
quee	b2777		25.029	223						17.9419																28.8603							4001.05																6435.85
eno	b2779	[g]	45.654	432		19486.2	18792.8	21184.1	23045.5	19814.5	18565.2	20522.6	24106	24452.2	24749.2	23929	21244.6	20424.4	20073.4	20126.5	21350.5	21630.1	27624.2	19973.2	19823.5	19564.2	20631.2	21301.5	8.41806e+06	8.1185e+06	9.15152e+06	9.95565e+06	8.55986e+06	8.02015e+06	8.86577e+06	1.04138e+07	1.05633e+07	1.06916e+07	1.03373e+07	9.17765e+06	8.82335e+06	8.67171e+06	8.69467e+06	9.2234e+06	9.34419e+06	1.19337e+07	8.62844e+06	8.56375e+06	8.45174e+06
pyrg	b2780	[f]	60.373	545		677.098	873.613	1055.73	1229.71	684.748	822.719	971.675	1160.24	1269.35	679.289	796.551	967.897	1177.03	1399.84	1462.37	1582.85	1926.24	897.138	1037.06	1298.14	1430.32	1556.02	1775.49	369018	476119	575373	670190	373188	448382	529563	632333	691798	370213	434120	527504	641483	762914	796992	862656	1.0498e+06	488940	565196	707484	779525
rela	b2784	[tk]	83.875	744		55.5034	54.1766	42.9146		62.288	54.4078	49.5699	39.6581	39.4584	54.8616		44.7511		47.9758	41.086			52.1089	49.3817	48.1279	33.3809	33.4839	38.8856	41294.6	40307.4	31928.4		46342.3	40479.4	36880	29505.6	29357	40817		33294.8		35694	30568			38769	36740	35807.2	24835.4
rlmd	b2785		48.052	433						16.7239					18.5018											10.0573							7241.44					8011.27											4354.8
yqca	b2790	[c]	16.274	149		235.424	196.861	150.912		275.195	194.757	240.065			286.272	327.078	341.522	216.987	142.738		110.019		298.42	171.573		173.204			35078.2	29332.2	22485.9		41004	29018.7	35769.6			42654.6	48734.6	50886.8	32331.1	21267.9		16392.8		44464.6	25564.4		25807.3
quef	b2794		32.587	282			110.53		112.262		140.861		116.302	98.1642	122.94		104.088							97.2107		110.852	115.205	91.1073		31169.4		31657.8		39722.9		32797.3	27682.3	34669.2		29352.7							27413.4		31260.1
ygdh	b2795	[r]	50.971	454		85.9159	69.8197	69.2585		83.7455	74.6093	69.4441	59.2889		65.5003	74.6895	76.0013	71.0074	76.6444			45.8804			74.2692	71.9682	54.3244	41.9776	39005.8	31698.2	31443.3		38020.4	33872.6	31527.6	26917.1		29737.1	33909	34504.6	32237.3	34796.5			20829.7			33718.2	32673.6
sdac	b2796	[e]	46.906	429
sdab	b2797		48.752	455
fuco	b2799	[c]	40.513	382		94.7386				406.595	138.504				171.941	161.96		111.277					165.71	63.693					36190.1				155319	52908.7				65681.5	61868.5		42507.6					63301.1	24330.7
fucu	b2804	[g]	15.473	140			450.451	386.943	284.728		480.034	448.953	325.517		518.055		435.395	440.179	238.257	242.997	181.782		544.103	409.497	341.294	297.182	210.309	209.519		63063.1	54172	39862		67204.7	62853.4	45572.4		72527.8		60955.3	61625	33356	34019.6	25449.5		76174.4	57329.6	47781.2	41605.5
ygdi	b2809		8.1741	75		4451.14	2263.13	1232.05	648.376	4245.26	3514.45	1661.45	860.92	717.8	7729.54	4879.95	3958.3		1057.8				4017.32	2753.3	1324.91	777.23	440.844	296.398	333835	169735	92403.4	48628.2	318394	263584	124609	64569	53835	579715	365996	296872		79335.2				301299	206497	99368.3	58292.3
csde	b2811		15.94	147		77.893	81.4363	76.0427	67.7831	71.3971	73.4824	68.0476	51.7884	51.6808		75.8814				74.8666			74.3485	67.9677	58.6642	72.6441	56.0759	58.3619	11450.3	11971.1	11178.3	9964.12	10495.4	10801.9	10003	7612.89	7597.08		11154.6				11005.4			10929.2	9991.26	8623.64	10678.7
mlta	b2813	[m]	40.41	365
amic	b2817		45.634	417											38.3319																							15984.4
arga	b2818	[e]	49.195	443			37.7864	41.3946	31.9188			39.8245	37.2125	41.2437											16.9211	21.0928	21.8107	21.1084		16739.4	18337.8	14140			17642.3	16485.2	18271											7496.06	9344.11
ptra	b2821		107.71	962								12.4404								7.2643		7.70601		8.22064											11967.6								6988.25		7413.18		7908.26
thya	b2827	[f]	30.479	264		151.669	147.069	162.361	146.186	149.315	140.711	156.035	144.337	148.127	156.383	89.515		97.7304	166.513	149.29				151.756	168.154	144.48	147.269	163.442	40040.5	38826.3	42863.3	38593.1	39419.2	37147.8	41193.3	38104.9	39105.5	41285.2	23632		25800.8	43959.4	39412.5				40063.6	44392.7	38142.8
ptsp	b2829	[t]	83.715	748			87.6544					80.656			112.468												57.3608			65565.5					60330.7			84126.1
tas	b2834	[c]	38.499	346		203.498	185.955	186.822	172.8	216.093	195.081	163.624	157.989	154.259	150.422	152.702	122.102	124.232	105.336		83.1412	84.8469	134.209	123.362	104.734	96.5028	103.165	82.5275	70410.5	64340.5	64640.5	59788.7	74768.3	67498	56613.8	54664.2	53373.5	52045.9	52834.8	42247.3	42984.2	36446.1		28766.8	29357	46436.3	42683.4	36237.8	33390
lysa	b2838	[e]	46.177	420			148.746																							62473.3
kdud	b2842	[iqr]	27.07	253
yqef	b2844	[i]	41.018	393
lyss	b2890	[j]	57.603	505		2661	2960.87	3098.49	3373.02	2745.86	2839.56	2935.94	3335.22	3435.18	2432.23	2633.66	2816.39	3134.77	3476.22	3587.27	3875.39	3927.66	2508.01	3003.59	3445.26	3560.73	3754.91	3974.44	1.3438e+06	1.49524e+06	1.56474e+06	1.70338e+06	1.38666e+06	1.43398e+06	1.48265e+06	1.68429e+06	1.73477e+06	1.22828e+06	1.33e+06	1.42228e+06	1.58306e+06	1.75549e+06	1.81157e+06	1.95707e+06	1.98347e+06	1.26654e+06	1.51681e+06	1.73986e+06	1.79817e+06
prfb	b2891	[j]	41.25	365		1201.49	1216.87	1213.46	1312.41	1177.93	1286.28	1271.85	1283.99	1281.41	1128.02	1126.71	1266.58	1333.63	1465.89	1411.97	1432.86	1405.72	1212.87	1168.52	1398.24	1398.34	1409.1	1419.19	438545	444157	442913	479028	429946	469491	464225	468655	467716	411729	411250	462303	486774	535050	515370	522994	513087	442696	426511	510357	510395
dsbc	b2893	[o]	25.621	236		179.965	190.308	185.95	236.318	197.139	196.661	294.059	312.685	256.947	185.303	219.539	291.804		249.297	246.267		102.052		197.745	199.737	215.284	281.73	201.473	42471.7	44912.7	43884.1	55770.9	46524.8	46412	69397.8	73793.8	60639.5	43731.4	51811.3	68865.8		58834	58119.1		24084.4		46667.8	47137.9	50806.9
cptb	b2897		10.547	88						231.364	219.157																						20360.1	19285.8
ygfz	b2898	[r]	36.094	326		1808.25	1602.1	1441.17	1211.5	1868.37	1835.08	1557.68	1358.7	1280.24	1785.22	1848.25	1573.66	1392.42	1280.66	1174.08	936.151	859.509	1888.71	1394.91	1311.6	1091.36	1011.74	975.389	589489	522283	469821	394949	609089	598234	507802	442936	417359	581982	602531	513013	453929	417496	382750	305185	280200	615719	454740	427581	355785
yqfb	b2900	[s]	11.905	103		331.13	323.965	259.556	265.281		373.852	304.874	262.249		385.874									253.514	207.672	198.108	189.425	174.975	34106.4	33368.4	26734.3	27323.9		38506.8	31402	27011.6		39745									26112	21390.2	20405.1
bgla	b2901	[g]	55.36	479		318.99	268.403	257.402	258.594	293.292	290.049	274.787	271.246	247.988	287.7	290.696	276.936	257.292	268.668	225.421	235.175	238.405	306.994	271.586	273.748	243.828	215.608	222.03	152796	128565	123296	123867	140487	138933	131623	129927	118786	137808	139243	132652	123243	128692	107977	112649	114196	147050	130090	131125	116794
gcvp	b2903	[e]	104.38	957		289.244	331.237	368.253	388.801	262.592	304.374	360.951	385.081	411.549	560.256	603.626	893.243	1002.27	1128	1094.04	1177.91	1330.47	546.634	939.323	1121.71	1185.67	1277.33	1309.36	276807	316994	352418	372082	251300	291286	345430	368522	393852	536165	577670	854834	959171	1.0795e+06	1.047e+06	1.12726e+06	1.27326e+06	523129	898932	1.07347e+06	1.13468e+06
gcvh	b2904	[e]	13.811	129		392.223	441.767	501.925		364.252			639.649	621.823	859.775	1008.2		1414.76	1386.46					1549.16	1577.46	1550.47	1939.28	1670.5	50596.8	56988	64748.4		46988.5			82514.7	80215.2	110911	130058		182504	178853					199842	203492	200011
gcvt	b2905	[e]	40.146	364		261.963	330.074	390.342	427.003	259.333	280.23	383.646	449.818	460.242	576.499	704.933	954.564	1189.98	1188.44	1432.85	1541.96	1444.52	700.093	1192.21	1430.71	1518.83	1559.49	1742.2	95354.4	120147	142084	155429	94397.2	102004	139647	163734	167528	209846	256596	347461	433154	432594	521558	561274	525806	254834	433963	520780	552855
pepp	b2908	[e]	49.815	441		424.86	367.015	307.231	244.848	386.16	383.34	311.148	271.844	249.867	387.71	341.814	302.75	259.115	250.431	235.04	199.263	171.031	351.309	297.877	287.226	232.163	211.244	198.153	187363	161854	135489	107978	170296	169053	137216	119883	110192	170980	150740	133513	114270	110440	103653	87875.1	75424.6	154927	131364	126667	102384
ygfb	b2909		21.229	192		109.591		108.644					80.6792											113.437	96.175	90.5432	112.27		21041.6		20859.7					15490.4											21779.8	18465.6	17384.3
zapa	b2910	[s]	12.594	109		309.642	260.055	257.054	236.478	301.338	273.414	278.933	268.666	280.404	311.942				170.16					315.724		272.755	158.686	231.717	33750.9	28346	28018.9	25776.1	32845.9	29802.2	30403.7	29284.6	30564.1	34001.7				18547.5					34413.9		29730.3
sera	b2913	[he]	44.175	410		6150.27	7623.28	9547.11	13901.1	6426.78	6909.97	8493.74	11400.6	13871.2	3584.99	3578.24	4100.14	4681.32	5586.97	6652.18	7570.53	9764.21	3754.12	4310.32	5428.17	6338.12	7173.03	8086.61	2.52161e+06	3.12555e+06	3.91431e+06	5.69944e+06	2.63498e+06	2.83309e+06	3.48243e+06	4.67424e+06	5.68718e+06	1.46985e+06	1.46708e+06	1.68106e+06	1.91934e+06	2.29066e+06	2.72739e+06	3.10392e+06	4.00333e+06	1.53919e+06	1.76723e+06	2.22555e+06	2.59863e+06
rpia	b2914	[g]	22.86	219		2005.67	1952.89	1681.45	1600.57	2122.77	1955.07	1887.36	1643.91	1567.87	2004.78	1985.75	1900.03	1736.99	1585.81	1533.08	1296.37	1137.15	2084.28	1846.01	1611.49	1485.03	1357.87	1239.32	439242	427683	368238	350525	464887	428160	413332	360016	343364	439048	434879	416106	380400	347292	335744	283904	249035	456458	404277	352916	325221
argp	b2916	[k]	33.471	297		167.839	147.83	159.086	180.668	181.792	166.909	153.262	164.476	152.419	135.235	149.472				109.141		121.295		126.044	117.024	106.099	96.1451	96.2306	49848	43905.6	47248.7	53658.4	53992.3	49571.9	45518.9	48849.3	45268.4	40164.9	44393.3				32415		36024.7		37434.9	34756.2	31511.5
ygge	b2922	[s]	26.635	246		1600.28	1453.02	1311.65	1317.27	1766.06	1450.87	1320.4	1240.47	1299.8	1745.83	1626.95	1330.57	1267.89	1078.24	1016.97	1017.39	912.944	1862.72	1271.35	1263.34	1037.72	954.278	943.392	393670	357443	322665	324047	434451	356913	324817	305157	319751	429474	400230	327321	311901	265247	250174	250277	224584	458229	312752	310782	255280
mscs	b2924	[m]	30.896	286		491.622	713.002	1026.59	997.121	452.993	504.087	729.558	1068.23	996.087	307.489	318.042	333.184	379.663	404.636	381.267	444.732	619.537	377.038	374.594	400.733	476.609	470.244	519.864	140604	203919	293606	285177	129556	144169	208654	305514	284881	87941.8	90960	95290.6	108584	115726	109042	127193	177188	107833	107134	114610	136310
fbaa	b2925	[g]	39.147	359		9009.9	8660.15	8895.16	8994.03	8839.58	8588.51	8783.23	9118.29	9315.81	11044.2	10594.6	10280.3	9758.18	9390.87	9246.3	8623.28	8837.77	11751.6	10067.5	9794.67	9371.41	8768.04	9018.26	3.23456e+06	3.10899e+06	3.19336e+06	3.22886e+06	3.17341e+06	3.08327e+06	3.15318e+06	3.27347e+06	3.34438e+06	3.96488e+06	3.80345e+06	3.69064e+06	3.50319e+06	3.37132e+06	3.31942e+06	3.09576e+06	3.17276e+06	4.21881e+06	3.61424e+06	3.51629e+06	3.36434e+06
pgk	b2926	[g]	41.118	387		18811.1	17257.3	16633.1	15289.6	19052.1	17674.5	17333.2	16939.7	16110.2	21176.3	20768	18826.7	17577	15822.9	14520.9	13440.2	10683.2	22524.9	17478.9	16355.9	14783.8	14245.6	13409.6	7.27989e+06	6.67856e+06	6.43702e+06	5.91706e+06	7.37316e+06	6.84002e+06	6.70794e+06	6.55568e+06	6.23466e+06	8.19522e+06	8.03722e+06	7.28594e+06	6.8023e+06	6.12344e+06	5.61959e+06	5.20136e+06	4.13441e+06	8.71714e+06	6.76432e+06	6.32973e+06	5.72135e+06
tkta	b2935		72.211	663		2497.24	2677.92	2607.87	2817.38	2391.42	2704.31	2698	2911.22	2932.01	2434.93	2804.2	3193.01	3738.92	3852.04	3759	3838.33	3620.67	2684.42	3492.64	3780.29	3635.9	3743.66	3724.04	1.65567e+06	1.77546e+06	1.72902e+06	1.86792e+06	1.58551e+06	1.79296e+06	1.78877e+06	1.93014e+06	1.94392e+06	1.61436e+06	1.85918e+06	2.11697e+06	2.4789e+06	2.5539e+06	2.49222e+06	2.54482e+06	2.4005e+06	1.77977e+06	2.31562e+06	2.50633e+06	2.4106e+06
yggg	b2936	[o]	26.842	252		330.033	248.75	221.583	199.627	370.829	261.804	230.036	194.318	194.523	371.728	310.219	276.69	249.552	196.592	185.511	168.959	139.458		263.577	267.256	182.631	165.284	158.155	83168.2	62685.1	55839	50306	93448.8	65974.6	57969.1	48968.1	49019.8	93675.6	78175.1	69725.8	62887.1	49541.1	46748.9	42577.7	35143.5		66421.3	67348.6	46023
speb	b2937	[e]	33.557	306		288.283	295.359	262.826	234.296	314.429	295.316	285.864	248.654	250.336	405.238	433.8	429.299	397.908	387.923	456.14	378.899	465.344	415.229	390.951	408.094	392.358	350.632	359.842	88214.6	90380	80424.8	71694.6	96215.4	90366.8	87474.5	76088.2	76602.8	124003	132743	131365	121760	118704	139579	115943	142395	127060	119631	124877	120062
spea	b2938	[e]	73.898	658		446.052	489.546	528.731	510.694	409.744	452.925	476.034	477.213	471.207	494.879	554.015	641.45	784.975	876.088	820.041	930.696	984.708	584.758	780.617	879.405	856.103	846.89	903.587	293502	322121	347905	336037	269612	298025	313230	314006	310055	325630	364542	422074	516513	576466	539587	612398	647938	384771	513646	578648	563316
metk	b2942	[h]	41.951	384		4174.39	4159.25	4828.4	6215.96	4386.22	4262.71	4553.32	5564.41	6394.98	3193.51	3263.86	3698.98	4242.78	4672.04	5315.89	5824.32	6644.01	3138.43	3836.81	4190.13	4759.55	5534.4	5740.18	1.60297e+06	1.59715e+06	1.8541e+06	2.38693e+06	1.68431e+06	1.63688e+06	1.74847e+06	2.13673e+06	2.45567e+06	1.22631e+06	1.25332e+06	1.42041e+06	1.62923e+06	1.79407e+06	2.0413e+06	2.23654e+06	2.5513e+06	1.20516e+06	1.47334e+06	1.60901e+06	1.82767e+06
galp	b2943		50.982	464																							23.4163
gshb	b2947	[hj]	35.56	316		462.134	446.718	425.456	376.319	442.773	430.802	391.667	373.659	411.646	430.504	426.784	421.971	401.869	389.778	347.803	333.197	337.583	411.982	404.503	378.722	357.269	330.036	328.012	146034	141163	134444	118917	139916	136133	123767	118076	130080	136039	134864	133343	126991	123170	109906	105290	106676	130186	127823	119676	112897
yqge	b2948		20.686	187		207.382	246.107	253.147			165.025	223.304	252.29	249.488	115.95				151.233						248.982	680.454	231.762	215.836	38780.5	46022.1	47338.4			30859.7	41757.9	47178.3	46654.3	21682.7				28280.6						46559.7	127245
yggs	b2951	[r]	25.787	234		136.867	139.096	148.882	145.383	164.124	144.791		145.174	134.709	140.52		147.899	115.36			105.969			142.27	145.118	137.275	145.469	135.129	32027	32548.5	34838.4	34019.7	38405.1	33881.1		33970.8	31521.9	32881.7		34608.3	26994.3			24796.8			33291.1	33957.5	32122.2
rdgb	b2954		21.039	197		262.097	277.831	272.811	294.986	220.217	249.176	282.591	293.117	283.28	207.341	238.559	258.008	299.075	315.461	285.087	279.944	228.779	199.938	271.436	309.852	292.194	338.148	298.529	51633.2	54732.7	53743.8	58112.2	43382.8	49087.7	55670.5	57744.1	55806.2	40846.2	46996.1	50827.6	58917.9	62145.8	56162.2	55149.1	45069.5	39387.8	53472.9	61040.9	57562.2
yggn	b2958		26.429	239		87.8349	147.63								128.637				116.795	122.772		85.4888		151.901		117.717		105.703	20992.5	35283.6								30744.2				27914	29342.4		20431.8		36304.4		28134.3
yggl	b2959		12.88	108		1380.21	1271.01	1208.52	1114.21	1478.19	1391.59	1279.27	1222.09	1276.78	1672.51	1492.97	1225.11	1194.94	1106.02	1158.18	1004.84	946.846	1760.99	1345.82	1235.6	1103.53	1115.76	1038.07	149063	137269	130520	120334	159645	150291	138161	131986	137892	180632	161241	132312	129054	119450	125084	108522	102259	190187	145349	133444	119182
trmi	b2960		27.307	239		130.004	140.529	135.767	150.525	140.73	139.248	176.882	153.931	159.862	150.912		161.645	174.239	180.105		237.962			184.042	183.425	203.932	182.579	196.712	31071	33586.5	32448.3	35975.5	33634.5	33280.2	42274.8	36789.4	38207	36068.1		38633.2	41643.2	43045		56872.8			43986.1	43838.5	48739.7
yggx	b2962	[co]	10.952	91		2287.53	1957.97	1483.39	1387.44	2464.77	2342.92	2097.19	1438.21	1278.38	2445.6	2885.8	2543.63	1909.65	1670.25	1436.04	921.803	648.39	2463.15	2204.29	1625.05	1595.85	1122.36	1212.74	208165	178176	134988	126257	224294	213206	190844	130877	116333	222549	262608	231470	173778	151992	130680	83884.1	59003.5	224147	200591	147879	145222
mltc	b2963	[m]	40.112	359				11.8958	15.2461																	19.2682	10.657	13.8169			4270.59	5473.35																	6917.29
spec	b2965		79.415	711		17.4849	22.2496	22.3063		36.7598	18.4024	22.9494	29.9327	29.3023	25.8978									29.4184	32.9096	31.0673	28.8887	31.3274	12431.7	15819.5	15859.8		26136.2	13084.1	16317	21282.2	20833.9	18413.3									20916.5	23398.7	22088.9
glcb	b2976	[c]	80.488	723		2789.94	2069.48	1553.65	672.528	2489.29	2303.67	1768.15	1025.81	725.436	2512.72	1962.73	1979.88	1591.82	937.785	686.529	678.931	333.261	711.382	1767.99	1692.47	1387.38	859.524	599.446	2.01713e+06	1.49623e+06	1.12329e+06	486238	1.79976e+06	1.66556e+06	1.27838e+06	741664	524490	1.8167e+06	1.41905e+06	1.43145e+06	1.15089e+06	678018	496361	490867	240948	514329	1.27825e+06	1.22366e+06	1.00307e+06
glcg	b2977	[r]	13.737	134		1634.99	1266.3	751.992	399.275	1577.98	1322.21	1149.28	703.028		1215.27	1072.91		1269.49	663.366		444.939	196.803	1121.35	1055.93	1093.03	708.461	532.159	340.903	219089	169685	100767	53502.8	211449	177176	154003	94205.7		162846	143770		170112	88891.1		59621.8	26371.5	150262	141494	146466	94933.8
gss	b2988	[e]	70.531	619		94.2741	104.569	92.5296	131.22	76.9873	110.04	76.5318	105.683	126.884	70.9916		59.636		100.301	68.5718	121.619	127.864		60.2399	64.6363	114.232	71.7871	92.4852	58355.6	64728.1	57275.8	81225.3	47655.1	68114.5	47373.2	65417.7	78541.3	43943.8		36914.7		62086.3	42445.9	75282	79147.9		37288.5	40009.9	70709.4
yghu	b2989		32.391	288		1596.77	1029.48	743.013	494.451	1632.09	1336.09	907.682	592.267	495.871	1708.42	1478.07	1106.46	765.566	486.269	340.789	276.116	264.138	1199.65	795.604	543.197	356.123	280.142	216.652	459869	296491	213988	142402	470041	384794	261412	170573	142811	492026	425683	318659	220483	140046	98147.3	79521.4	76071.9	345498	229134	156441	102563
yghZ	b3001		38.832	346		1682.85	769.581	787.129		1262.34	1581.09	844.454	623.685	375.581	371.404	474.59	1199.76		519.482				987.5	817.802		798.038		262.244	582266	266275	272347		436771	547057	292181	215795	129951	128506	164208	415116		179741				341675	282960		276121
ygha	b3003	[iqr]	31.488	294		29.767	19.6541	16.2558		28.6315			12.0546		44.8638									11.7685					8751.5	5778.3	4779.22		8417.67			3544.05		13190									3459.94
exbd	b3005	[u]	15.527	141		220.883	249.047	241.27							155.406	143.696	182.609												31144.5	35115.7	34019.1							21912.3	20261.2	25747.9
exbb	b3006	[u]	26.287	244		177.289	194.652	238.453	270.019	155.178	189.814	207.427	274.278	295.795	151.967		231.096	160.032	282.03	272.119	254.038	278.557	145.063	235.224	188.7	209.514	253.354	153.031	43258.6	47495.2	58182.5	65884.5	37863.5	46314.7	50612.1	66923.7	72174	37080.1		56387.3	39047.8	68815.3	66397	61985.2	67967.9	35395.4	57394.7	46042.7	51121.3
metc	b3008	[e]	43.212	395		654.711	556.259	487.993	512.109	720.735	632.588	508.36	498.166	523.557	396.195	383.704	364.107	366.509	320.463	280.583	264.798		386.367	368.445	335.155	295.067	289.054	246.105	258611	219722	192757	202283	284690	249872	200802	196776	206805	156497	151563	143822	144771	126583	110830	104595		152615	145536	132386	116551
yqhd	b3011	[c]	42.097	387		289.764	225.688	256.915	413.269	275.712	247.992	217.664	316.409	421.674	302.421	334.895	260.571	225.363	195.382	176.013	204.642	198.577	258.853	204.097	176.148	165.321	205.483	161.215	112139	87341.2	99426.2	159935	106701	95972.9	84236	122450	163188	117037	129604	100841	87215.5	75612.8	68116.9	79196.3	76849.3	100176	78985.4	68169.3	63979.4
dkga	b3012		31.109	275		313.242	247.59	198.845	165.997	312.091	276.092	245.513	220.812	211.774	515.924	403.541	219.177		236.254		194.292		463.82	201.046	165.756	106.998	72.1152	49.3402	86141.6	68087.1	54682.5	45649.2	85825.1	75925.2	67516	60723.2	58238	141879	110974	60273.7		64969.8		53430.3		127550	55287.8	45582.9	29424.4
plsc	b3018	[i]	27.453	245				10.6214		10.672														15.486							2602.24		2614.63														3794.07
parc	b3019	[l]	83.83	752		56.7374	58.2075	65.0438	53.9334	63.9338	51.5491		58.0729	68.473	49.3986					59.2443		76.5656		68.0333	75.2597	85.6146	85.0027	86.2812	42666.6	43772.1	48913	40557.9	48078.2	38764.9		43670.8	51491.7	37147.7					44551.7		57577.4		51161	56595.3	64382.2
ygiw	b3024	[s]	14.011	130					524.016	706.72	884.07	399.422			1027.4	753.61								1046.77								68122.1	91873.5	114929	51924.9			133563	97969.3								136080
mdab	b3028	[r]	21.891	193		914.845	767.107	679.899	563.094	1025.55	835.552	679.135	622.149	631.326	901.339	832.761	743.831	674.609	562.981	468.494	482.943	414.082	865.675	683.272	622.839	497.975	540.301	520.701	176565	148052	131220	108677	197930	161262	131073	120075	121846	173958	160723	143559	130199	108655	90419.3	93208	79917.9	167075	131872	120208	96109.3
ygin	b3029	[s]	11.532	104		1080.72	1111.93	923.994	832.711	1366.81	1224.16	975.778	847.228	837.625	1271.73	1119.05	1291.72	1048.34	868.522	759.364	637.061	678.818	1340.55	971.102	884.488	741.968	647.364	613.501	112395	115641	96095.3	86601.9	142149	127312	101481	88111.7	87113	132260	116382	134339	109027	90326.3	78973.8	66254.3	70597	139418	100995	91986.7	77164.7
pare	b3030	[l]	70.243	630		24.8913	25.6613	25.8666	30.6442	22.4376				31.6801	20.7195						40.4504			25.1727	27.609	35.9943	33.2002	37.6586	15681.5	16166.6	16296	19305.9	14135.7				19958.5	13053.3						25483.7			15858.8	17393.6	22676.4
cpda	b3032	[r]	30.938	275
nudf	b3034	[lr]	23.667	209		127.229	118.093			113.245	161.882	105.696			156.529									121.571		91.0211	95.4721	82.5273	26591	24681.4			23668.1	33833.4	22090.5			32714.5									25408.2		19023.4
tolc	b3035	[mu]	53.74	493		3024.01	2888.54	2752.7	2709.67	3040.96	2932.31	2788.89	2776.02	2736.74	3230.66	3091.98	2903.25	2740.46	2624.93	2681.36	2630.54	2545.04	3311.51	2868.15	2657.67	2688.81	2545.59	2508.16	1.49084e+06	1.42405e+06	1.35708e+06	1.33587e+06	1.49919e+06	1.44563e+06	1.37492e+06	1.36858e+06	1.34922e+06	1.59272e+06	1.52435e+06	1.4313e+06	1.35105e+06	1.29409e+06	1.32191e+06	1.29685e+06	1.2547e+06	1.63257e+06	1.414e+06	1.31023e+06	1.32558e+06
ygib	b3037		23.479	223		203.419	168.839	154.942	137.59	216.096	170.732	146.577	129.728	123.071	226.911	164.358	172.625	165.725	205.762	121.679	126.402	128.292		176.884	150.077	133.172	140.318	138.162	45362.5	37651.1	34552.1	30682.7	48189.3	38073.2	32686.6	28929.3	27444.9	50601.2	36651.8	38495.4	36956.7	45884.9	27134.5	28187.8	28609.1		39445.2	33467.2	29697.3
ygic	b3038	[e]	45.025	386		80.0416	84.5293	83.8255	73.4521	91.1254		85.7421	79.2283	71.8179	97.651	96.1532	89.2229	98.0719	82.2493	59.9521		54.3374	99.6181	116.046	93.5268	90.0514	66.4563	75.6221	30896.1	32628.3	32356.6	28352.5	35174.4		33096.4	30582.1	27721.7	37693.3	37115.1	34440.1	37855.8	31748.2	23141.5		20974.2	38452.6	44793.9	36101.4	34759.8
ribb	b3041		23.353	217		87.032	94.9796	93.2092	73.9718																	80.1		74.5506	18885.9	20610.6	20226.4	16051.9																	17381.7
yqic	b3042		11.276	96		1196.44	1119.99	1022.85	1058.42	1183.65	1155.49	1069.17	1127.62	1141.51	1144.13	1309.9	1134.92	1057.73	910.346	1017.77	945.741	942.838	1170.18	979.884	963.08	947.122	906.974	881.469	114858	107519	98193.9	101608	113630	110927	102640	108251	109585	109836	125750	108953	101542	87393.2	97706	90791.1	90512.5	112337	94068.9	92455.7	90923.7
rfae	b3052	[m]	51.05	477		609.05	631.91	616.458	591.76	618.527	623.782	628.911	590.365	604.459	656.154	633.597	616.436	676.076	679.759	664.692	623.531	711.149	666.288	655.204	661.001	634.471	613.151	639.128	290517	301421	294050	282269	295038	297544	299991	281604	288327	312985	302226	294040	322488	324245	317058	297425	339218	317819	312532	315298	302643
glne	b3053	[ot]	108.42	946		55.2698	51.8618						50.1221		62.2871	53.1323	40.9065	39.7738					60.8261			34.7183			52285.2	49061.2						47415.5		58923.6	50263.1	38697.6	37626					57541.5			32843.5
ygif	b3054	[s]	48.388	433		85.1693	83.4699	84.9119	86.2826	88.9522	84.0073	75.8311	91.0546	90.2572	74.1072	72.6407	75.4783	68.4478	67.3105	63.0288	69.4604	60.3539	77.6891	69.354	76.901	63.425	61.0665	62.3785	36878.3	36142.5	36766.9	37360.4	38516.3	36375.2	32834.8	39426.7	39081.4	32088.4	31453.4	32682.1	29637.9	29145.4	27291.5	30076.3	26133.2	33639.4	30030.3	33298.1	27463
ygim	b3055		23.076	206		173.789	103.944	68.843	70.1013		174.636				313.943					85.5229				152.486	115.892	93.4188	73.8087	79.4931	35800.5	21412.4	14181.7	14440.9		35975				64672.2					17617.7				31412.1	23873.8	19244.3
folb	b3058	[h]	13.619	122			109.351				108.894						133.465						89.1213	116.622						13340.9				13285.1						16282.7						10872.8	14227.9
ygjd	b3064	[o]	36.008	337			37.7468	52.1409	61.2445	52.5543	50.6971	55.877	55.6131	48.761	52.838	60.2738						70.5663	67.4627	47.6203	68.3703		60.1077	70.9075		12720.7	17571.5	20639.4	17710.8	17084.9	18830.5	18741.6	16432.5	17806.4	20312.3						23780.8	22734.9	16048.1	23040.8
rpsu	b3065	[j]	8.4999	71		8605.15	10670.3	12006.2	14190.7	9345.81	9888.4	11257.3	13187	13888.8	8621.58	9202.83	11557.7	13416.2	15005	16779.3	17562	18247.4	8856.17	12111.7	15189.1	16516.9	16874.8	17733.1	610966	757593	852442	1.00754e+06	663553	702076	799270	936275	986106	612132	653401	820593	952548	1.06536e+06	1.19133e+06	1.2469e+06	1.29556e+06	628788	859933	1.07842e+06	1.1727e+06
rpod	b3067	[k]	70.263	613		615.701	586.859	560.335	526.007	581.664	553.792	502.286	556.105	537.153	671.821	635.86	617.019	615.424	561.446	570.915	569.662	638.431	686.138	593.552	599.151	597.513	574.852	622.337	377425	359745	343485	322442	356560	339474	307901	340893	329275	411826	389782	378233	377255	344166	349971	349203	391358	420603	363847	367280	366275
mug	b3068		18.673	168		151.052	168.283		121.257	168.433	188.72	210.747	301.352	174.986	128.794	145.138	239.777				101.572		160.897	143.105	164.806	131.593		144.696	25376.8	28271.5		20371.1	28296.7	31704.9	35405.5	50627.2	29397.7	21637.5	24383.3	40282.6				17064.1		27030.7	24041.7	27687.4	22107.5
yqjh	b3070	[p]	28.871	254			76.303	84.177	65.4756						72.9622											53.0885	67.4061			19381	21381	16630.8						18532.4											13484.5
yqji	b3071	[k]	23.401	207
aer	b3072	[t]	55.065	506
pata	b3073		49.661	459
fadh	b3081	[c]	72.677	672
ygjr	b3087	[r]	36.214	328		249.598	145.882	92.782		147.563	228.564	101.518			286.926									150.375		63.6304			81868.3	47849.1	30432.5		48400.8	74968.9	33297.8			94111.8									49322.9		20870.8
sstt	b3089	[e]	43.477	414			294.78	248.048	166.296		309.82	241.36			410.704									382.061	346.641	305.479				122039	102692	68846.6		128265	99923.1			170031									158173	143509	126468
uxac	b3092	[g]	53.987	470		107.98	56.0497	50.6553	34.0134				44.2692			35.5594								76.0221		47.7364	41.0655	40.5326	50750.5	26343.3	23808	15986.3				20806.5			16712.9								35730.4		22436.1
yqjd	b3098	[s]	11.051	101		13600.5	11518.5	11434.6	8914.11	15738.4	11803.7	10926.6	8891.87	8398.77	16533.8	13501	9870.29	8149.85	5004.13	3854.16	3430.76	2953.61	15943.7	8572.73	6155.24	5174.68	3609.97	3264.02	1.37365e+06	1.16337e+06	1.1549e+06	900325	1.58957e+06	1.19218e+06	1.10359e+06	898079	848275	1.66991e+06	1.3636e+06	996899	823135	505417	389270	346507	298315	1.61031e+06	865846	621679	522643
yqje	b3099	[s]	15.147	134					29.0041						50.6776											18.2782						3886.55						6790.8											2449.28
yqjk	b3100		11.811	99																				100.427																							9942.27
tdcf	b3113		14.007	129																439.823								246.872															56737.2
agar	b3131	[kg]	29.572	269						62.3013		67.0845																					16759.1		18045.7
rsmi	b3146		31.348	286		78.9184	80.2644	73.776		71.702				89.7864						72.5971				78.5115	61.2725	64.5069	69.3792	65.528	22570.7	22955.6	21099.9		20506.8				25678.9						20762.8				22454.3	17523.9	18449
lpoa	b3147		72.824	678		343.569	335.753	336.573	356.482	307.5	322.766	338.655	350.691	330.699	313.318	313.896	294.807	291.924	289.879	290.451	302.569	303.423	323.223	299.167	319.495	308.164	273.441	288.428	232940	227640	228197	241695	208485	218835	229608	237768	224214	212429	212821	199879	197925	196538	196926	205142	205721	219145	202836	216617	208935
diaa	b3149		21.106	196			78.5956	68.8287						75.851													57.4188	57.2394		15404.7	13490.4						14866.8
yrap	b3150	[r]	20.028	191		713.972	634.783	580.667	521.735	747.191	685.426	662.437	595.858	528.629	738.931	715.621	716.632	607.357	546.573	543.927	495.362	457.827	866.445	661.121	608.788	482.771	442.114	427.773	136369	121244	110907	99651.4	142713	130916	126526	113809	100968	141136	136684	136877	116005	104396	103890	94614.1	87444.9	165491	126274	116278	92209.3
yhbs	b3156	[r]	18.534	167		266.57	244.169	202.091	135.582	313.586	268.481	228.991	177.201		301.809		235.882							234.575	201.362	157.276	176.745	130.044	44517.2	40776.2	33749.2	22642.3	52368.9	44836.4	38241.4	29592.6		50402.1		39392.3							39174.1	33627.4	26265
dead	b3162	[lkj]	70.545	629		169.695	352.014	498.389	697.31		222.524	390.055	479.822	331.217	78.2992		308.629	232.702			479.588	578.234		368.446	461.215	636.877	557.979	595.082	106738	221417	313487	438608		139968	245345	301808	208336	49250.2		194128	146370			301661	363709		231753	290104	400596
nlpi	b3163	[r]	33.62	294											88.6257										89.4784	55.4075												26056										26306.6	16289.8
pnp	b3164		77.1	711		3271.86	3459.3	3277.74	3194.93	3232.79	3319.04	3349.17	3402.45	3119.97	3442.1	3680.24	3733.35	3974.85	3689.77	3645.6	3695.04	3514.85	3735.92	3825.97	3941.32	3778.75	3478.76	3494.38	2.32629e+06	2.45956e+06	2.33048e+06	2.2716e+06	2.29851e+06	2.35984e+06	2.38126e+06	2.41914e+06	2.2183e+06	2.44733e+06	2.61665e+06	2.65441e+06	2.82612e+06	2.62343e+06	2.59202e+06	2.62717e+06	2.49906e+06	2.65624e+06	2.72027e+06	2.80228e+06	2.68669e+06
rpso	b3165	[j]	10.269	89		12419.7	14186.6	16909.1	18665.9	12370.6	13020.6	15702.2	18272.5	18861.9	12111.5	12563.9	15396.3	17729.1	18904.2	21298.4	22072.3	25037.8	12902.4	16916.9	19798.7	20936.7	22526.2	23889.3	1.10535e+06	1.2626e+06	1.50491e+06	1.66127e+06	1.10099e+06	1.15883e+06	1.39749e+06	1.62625e+06	1.67871e+06	1.07792e+06	1.11818e+06	1.37027e+06	1.57789e+06	1.68247e+06	1.89555e+06	1.96443e+06	2.22837e+06	1.14832e+06	1.50561e+06	1.76209e+06	1.86337e+06
trub	b3166	[j]	35.087	314				29.0153		21.2429																					9110.81		6670.26
rbfa	b3167	[j]	15.154	133		1437.78	1436.88	1453.85	1357.05	1334.44	1423.93	1578.01	1475.39	1466.9	1460.54	1603.58	1558.78	1921.92	2001.46	1762.1	1320.36	1427.71	1546.79	1474.35	1666.75	1643.52	1538.56	1635.04	191225	191105	193363	180488	177480	189382	209875	196227	195097	194252	213276	207317	255615	266194	234360	175609	189885	205723	196089	221678	218588
infb	b3168	[j]	97.349	890		1773.71	2107.24	2179.99	2248.97	1865.44	1904.5	2122.96	2259.14	2269.77	1712.03	1875.8	2135.06	2349.22	2515.51	2474.24	2454	2572.14	1910.07	2252.41	2458.39	2429.27	2385.9	2487.44	1.5786e+06	1.87545e+06	1.94019e+06	2.00159e+06	1.66024e+06	1.695e+06	1.88944e+06	2.01063e+06	2.0201e+06	1.52371e+06	1.66947e+06	1.9002e+06	2.0908e+06	2.2388e+06	2.20208e+06	2.18406e+06	2.2892e+06	1.69996e+06	2.00465e+06	2.18797e+06	2.16205e+06
nusa	b3169	[k]	54.87	495		2029.93	2235.43	2411.76	2346.67	1983.84	2164.76	2242.18	2241.44	2278.34	1920.07	2061.26	2201.26	2320.17	2368.02	2360.4	2301.16	2343.89	2092.27	2291.74	2390.03	2347.93	2425.1	2415.17	1.00482e+06	1.10654e+06	1.19382e+06	1.1616e+06	982003	1.07156e+06	1.10988e+06	1.10951e+06	1.12778e+06	950433	1.02032e+06	1.08962e+06	1.14849e+06	1.17217e+06	1.1684e+06	1.13907e+06	1.16022e+06	1.03568e+06	1.13441e+06	1.18307e+06	1.16222e+06
argg	b3172	[e]	49.898	447		3298.47	4521.51	6136.24	8034.31	3508.19	3746.33	4887.43	7059.13	7853.85	2234.68	2112.7	2738.06	3455.29	4083.71	4675.45	5632.44	6851.95	1904.81	3212.45	4374.3	5459.72	6199.16	7348.42	1.47441e+06	2.02111e+06	2.7429e+06	3.59134e+06	1.56816e+06	1.67461e+06	2.18468e+06	3.15543e+06	3.51067e+06	998903	944378	1.22391e+06	1.54451e+06	1.82542e+06	2.08993e+06	2.5177e+06	3.06282e+06	851452	1.43596e+06	1.95531e+06	2.4405e+06
secg	b3175	[u]	11.365	110		820.191	949.176	991.204	1102.19	843.797	856.519	952.559	1004.18	1026.78	848.721	846.31	964.147	963.111	1117.26	1197.81	1153.87	1171.66	799.109	1063.31	1091.83	1143.12	1155.31	1259.21	90221	104409	109032	121241	92817.6	94217.1	104781	110460	112946	93359.3	93094.1	106056	105942	122898	131759	126926	128883	87902	116964	120101	125743
glmm	b3176	[g]	47.543	445		907.1	930.438	915.147	936.515	881.038	836.374	965.941	922.458	911.875	900.229	912.593	1027.33	1162.83	1062.9	1129.5	1207.09	1149.89	930.816	1064.2	1154.53	1144.17	1147.05	1166.38	403659	414045	407241	416749	392062	372186	429844	410494	405785	400602	406104	457163	517459	472992	502629	537157	511699	414213	473567	513766	509154
folp	b3177		30.615	282		74.5201	91.9278	106.784	114.86	77.7791	87.5935			116.848	73.7942			91.3123	124.018			144.892	55.4229	82.7153	104.996	115.885	126.898	157.801	21014.7	25923.6	30113.2	32390.5	21933.7	24701.4			32951.1	20810			25750.1	34973.1			40859.4	15629.3	23325.7	29608.9	32679.5
ftsh	b3178	[o]	70.707	644		1139.91	1152.62	1196.58	1212.83	1160.74	1153.04	1185.81	1241.81	1246.65	1061.74	1073.49	1117.24	1191.4	1187.58	1133.65	1138.61	1143.98	1124.82	1088.7	1191.25	1077.51	1077.49	1082.01	734105	742287	770594	781064	747514	742558	763661	799723	802841	683760	691328	719502	767263	764799	730069	733264	736721	724384	701126	767162	693917
rlme	b3179		23.335	209		296.434	232.972	256.744	196.402		195.613	209.13	206.006		118.148	211.858		314.881							244.094	332.799	263.997	283.86	61954.6	48691.1	53659.5	41048		40883.2	43708.2	43055.2		24693	44278.3		65810.1							51015.6	69555
yhby	b3180	[j]	10.784	97		1074.65	1198.43	1261.68	1385.43	1126.73	1208.26	1244.74	1282.68	1359.84	1126.5	1139.24	1323.82	1367.59	1277.76	1474.97	1429.36	1463.71	1191	1233.37	1258.98	1408.02	1435.01	1451.85	104241	116248	122383	134387	109292	117201	120740	124420	131905	109271	110507	128411	132657	123943	143072	138648	141980	115527	119637	122121	136578
grea	b3181		17.641	158		2436.41	2402.03	2237.35	2034.22	2387.99	2462.82	2431.51	2166.48	2076.7	2499.44	2593.07	2477.37	2610.39	2296.51	2421.74	2178.6	1383.15	2894.52	2808.44	2795.68	2820.28	2600.68	2511.55	384952	379521	353501	321407	377302	389126	384179	342304	328118	394911	409705	391425	412442	362849	382636	344219	218537	457334	443733	441717	445604
obge	b3183	[r]	43.285	390		259.686	292.817	312.645	327.406	280.097	291.26	301.554	287.836	277.293	300.873	320.381	330.044	329.491	385.672	392.248	358.304	379.15	347.408	328.429	414.5	392.639	358.183	390.703	101278	114199	121932	127688	109238	113591	117606	112256	108144	117341	124949	128717	128501	150412	152977	139738	147868	135489	128087	161655	153129
rpma	b3185	[j]	9.1244	85		4010.39	4948.42	6155.91	6005.87	4029.2	4372.22	5316.44	6233.46	6579.46	3953.17	4081.51	4803.34	6510.29	6775.39	7562.85	6276.49	8646.5	3784.48	5459.46	6701.76	7737.54	7803.54	8837.69	340883	420616	523252	510499	342482	371639	451898	529844	559254	336019	346928	408284	553375	575908	642843	533502	734953	321681	464054	569650	657691
rplu	b3186	[j]	11.564	103		14228.9	16807	20082.6	22107.6	14332	15276.2	18231.5	21287.4	23251.7	13624.9	14989.1	17766.2	21277.3	23140.6	26342	27375.4	30043	14337.3	20241	23774.2	25658	26107.8	28430.1	1.46558e+06	1.73112e+06	2.06851e+06	2.27709e+06	1.4762e+06	1.57344e+06	1.87785e+06	2.1926e+06	2.39493e+06	1.40337e+06	1.54388e+06	1.82992e+06	2.19156e+06	2.38349e+06	2.71323e+06	2.81966e+06	3.09442e+06	1.47674e+06	2.08483e+06	2.44875e+06	2.64278e+06
ispb	b3187	[h]	35.217	323			88.9502		77.676	72.8755		88.8111	70.6015		52.4398									72.9286			78.2206	81.9884		28730.9		25089.3	23538.8		28686	22804.3		16938.1									23555.9
mura	b3189	[m]	44.817	419		310.018	349.731	373.494	387.086	334.571	371.854	357.915	411.236	377.034	313.014	307.285	337.647	339.43	324.985	329.034	330.18	321.04	337.97	356.844	362.925	336.931	339.855	332.111	129898	146537	156494	162189	140185	155807	149966	172308	157977	131153	128753	141474	142221	136169	137865	138345	134516	141609	149517	152065	141174
mlab	b3191		10.68	97																						68.7972																							6673.33
mlac	b3192		23.962	211		1083.29	931.913	798.23	757.93	1006.51	1154.49	844.964	733.974	721.138	1269.1	1007.4	854.17	992.84	838.396	786.824	687.852	200.787	1367.49	1035.71	853.259	848.284	1037.31	588.236	228575	196634	168427	159923	212374	243597	178287	154868	152160	267781	212562	180230	209489	176902	166020	145137	42366.1	288541	218535	180038	178988
mlad	b3193		19.576	183		398.255	377.328	413.166	419.23	413.839	420.419	482.46	438.822	452.456	416.936	499.017	452.01	447.369	409.304	471.078	465.516	518.121	426.238	424.157	486.633	440.175	427.831	475.054	72880.6	69051	75609.5	76719.1	75732.5	76936.6	88290.1	80304.4	82799.5	76299.3	91320.2	82717.8	81868.6	74902.6	86207.2	85189.5	94816.1	78001.5	77620.8	89053.8	80552
mlaf	b3195		29.096	269					66.5417	110.162		61.446			72.6829	65.3573	77.4864								62.4545	66.7527						17899.7	29633.5		16529			19551.7	17581.1	20843.8								16800.3	17956.5
kdsd	b3197	[m]	35.196	328		156.657	143.706	150.491		176.964	186.666	159.945	158.151	191.534	176.062	192.766	154.85							114.246	161.823	131.035	152.205	154.727	51383.5	47135.5	49360.9		58044.3	61226.3	52462.1	51873.5	62823	57748.3	63227.2	50790.7							37472.6	53078	42979.6
kdsc	b3198	[r]	19.997	188			206.706	181.761	197.411	206.141	226.148	210.696	204.372	199.552	200.753	193.142		211.171	169.311	194.121	169.365	171.281	209.697	187.477	191.319	192.378	185.975	189.244		38860.7	34171.1	37113.3	38754.5	42515.8	39610.8	38421.9	37515.8	37741.5	36310.7		39700.2	31830.4	36494.8	31840.7	32200.8	39423	35245.7	35968	36167
lptc	b3199		21.702	191												57.8003									56.9602														11039.9									10879.4
lpta	b3200		20.127	185					145.528	174.043	186.534	148.902	125.562	130.143	206.362			204.771	144.078	141.95				173.004	136.786	144.574		124.71				26922.7	32197.9	34508.8	27546.9	23228.9	24076.4	38177			37882.6	26654.4	26260.7				32005.7	25305.3	26746.2
lptb	b3201		26.8	241		419.347	379.276	356.085	379.662	407.671	376.071	385.187	337.341	352.719	513.396		405.086		415.254	350.169		291.566		412.475	362.581	362.028	345.603	336.759	101063	91405.4	85816.5	91498.6	98248.6	90633.2	92830.1	81299.2	85005.3	123729		97625.7		100076	84390.8		70267.4		99406.5	87382.1	87248.8
rpon	b3202	[k]	53.989	477			29.5433	26.9772							26.9449															14092.1	12868.1							12852.7
hpf	b3203		10.75	95		2018.03	1466.13	1286.06		1838.59	1831.24	1520.97	826.062	770.246	2139.27	2167	1817.96	1322.96					2287.26	1296.39	1048.78	800.856	495.525	523.926	191713	139282	122176		174666	173967	144492	78475.9	73173.4	203230	205865	172706	125681					217290	123157	99634.5	76081.4
ptsn	b3204	[gt]	17.959	163		425.402	319.418	283.556	226.954	449.419	388.806	392.403	281.349	274.958	398.709									402.502		256.783	237.572	226.804	69340.6	52065.1	46219.7	36993.6	73255.3	63375.4	63961.6	45859.9	44818.1	64989.6									65607.8		41855.7
yhbj	b3205	[r]	32.492	284
elbb	b3209	[q]	22.981	217		1709.53	1597.76	1296.52	1056.34	1746.99	1686.47	1637.78	1183.52	1104.52	1704.76	2040.72	1840.47	1704.03	1459.87	1212.82	914.087	816.665	1816.82	1854.6	1530.5	1184.05	1036.93	965.947	370968	346713	281346	229225	379096	365963	355398	256825	239681	369932	442836	399381	369774	316792	263181	198357	177216	394249	402448	332119	256939
arcb	b3210	[t]	87.982	778		48.9582	42.7172	38.7149	30.9973	43.1551	34.7449	30.427	28.494	21.8443	40.5961								37.1727	37.3318	32.7929				38089.4	33234	30120.2	24115.9	33574.7	27031.5	23672.2	22168.3	16994.9	31583.7								28920.4	29044.1	25512.9
gltb	b3212	[e]	163.3	1486		731.697	953.155	1262.89	1624.4	715.345	860.574	1097.23	1436.11	1732.62	291.87	363.535	431.028	537.567	650.611	831.951	836.347	1041.84	394.215	409.912	526.676	661.925	802.395	871.241	1.0873e+06	1.41639e+06	1.87665e+06	2.41386e+06	1.063e+06	1.27881e+06	1.63049e+06	2.13405e+06	2.57468e+06	433718	540213	640508	798824	966808	1.23628e+06	1.24281e+06	1.54818e+06	585804	609130	782641	983620
gltd	b3213	[er]	52.015	472		911.291	1182.15	1521.25	1942.62	877.063	988.57	1342.78	1664.99	1941.98	358.807	413.946	529.438	644.312	803.188	876.928	969.03	1170.7	433.816	497.883	621.451	766.635	937.009	1004.62	430129	557974	718030	916916	413974	466605	633794	785876	916613	169357	195383	249895	304115	379105	413910	457382	552573	204761	235001	293325	361852
nana	b3225	[em]	32.593	297		87.3229	81.0675	44.0138		103.002		96.3513	55.2186									43.4436		121.61	111.991	88.3947	81.1964	46.4141	25934.9	24077	13072.1		30591.7		28616.3	16399.9									12902.7		36118.2	33261.5	26253.2
sspb	b3228	[r]	18.262	165		280.856	274.415	284.825				269.899	288.311						371.044					338.998		246.272		289.556	46341.2	45278.5	46996.1				44533.3	47571.3						61222.3					55934.7		40634.8
sspa	b3229	[o]	24.305	212		2481.7	2327.71	2268.39	2032.16	2470.29	2326.15	2366.83	2188.13	2129.62	2623.67	2748.44	2661.56	2498.66	2392.75	2340.65	2284.27	2205.33	2965	2549.56	2623.47	2354.73	2211.57	2434.99	526121	493473	480898	430818	523701	493145	501768	463883	451480	556218	582670	564251	529716	507263	496217	484265	467529	628581	540507	556176	499204
rpsi	b3230	[j]	14.856	130		15984	19477.5	23647.4	26839.6	15824.1	17776.1	20843.6	25131.8	27292.7	15475.4	16653.2	20379.2	24248.7	26997.3	30841.7	33895.4	36328.1	16205.6	23211	27575.9	30371.1	31569.6	34041.4	2.07792e+06	2.53207e+06	3.07416e+06	3.48914e+06	2.05713e+06	2.31089e+06	2.70967e+06	3.26714e+06	3.54805e+06	2.0118e+06	2.16491e+06	2.6493e+06	3.15233e+06	3.50965e+06	4.00942e+06	4.4064e+06	4.72265e+06	2.10673e+06	3.01743e+06	3.58486e+06	3.94824e+06
rplm	b3231	[j]	16.018	142		12019.9	14623.3	17652.6	19520.8	11620.6	12371.1	15397.3	18949.8	21042.5	11253.3	12239.7	15447.2	18479.2	19963.5	23491.4	25250.5	26310	11979.5	17047.7	19720.3	22787.3	23208.2	24584.3	1.70683e+06	2.07651e+06	2.50668e+06	2.77195e+06	1.65013e+06	1.7567e+06	2.18642e+06	2.69087e+06	2.98804e+06	1.59797e+06	1.73804e+06	2.1935e+06	2.62405e+06	2.83482e+06	3.33578e+06	3.58557e+06	3.73602e+06	1.7011e+06	2.42077e+06	2.80028e+06	3.2358e+06
yhcm	b3232	[r]	43.063	375			26.964	23.9754	26.2333	33.1368	35.2526	25.3642	27.4553		25.0042							27.3867		29.0829	25.267	24.9028	25.326	24.4485		10111.5	8990.78	9837.49	12426.3	13219.7	9511.56	10295.7		9376.56							10270		10906.1	9475.13	9338.55
yhcb	b3233	[s]	14.961	132		3424.82	3523.03	3610.6	3440.91	3352.02	3362.01	3464.43	3615.23	3447.8	3045.6	3043.64	3376.87	3459.86	3362.96	3388.16	3198.15	2749.31	3283.94	3446.73	3416.22	3369.95	3008.45	3055.38	452076	465040	476600	454200	442467	443785	457304	477210	455109	402019	401760	445747	456701	443911	447237	422155	362909	433479	454969	450941	444833
degq	b3234	[o]	47.204	455		452.944	458.103	387.599	342.491	482.406	455.366	464.533	404.49	340.59	484.523	469.028	459.211	402.992	325.383	273.187	229.4	201.602	529.915	409.654	369.475	290.193	235.648	260.817	206089	208437	176357	155833	219495	207192	211362	184043	154968	220458	213408	208941	183362	148049	124300	104377	91729	241112	186392	168111	132038
degs	b3235	[o]	37.581	355				20.0631				20.9881																			7122.41				7450.77
mdh	b3236	[c]	32.337	312		66771	65653.1	61969.9	57027.7	67895.1	68915.5	63321	63981.7	56988	75432.7	80673.2	88809.3	93565.6	90118.3	80353.5	66972.5	41464.3	79545.6	93314	95264.5	86929.9	73806	61467.9	2.08326e+07	2.04838e+07	1.93346e+07	1.77926e+07	2.11833e+07	2.15016e+07	1.97562e+07	1.99623e+07	1.77802e+07	2.3535e+07	2.517e+07	2.77085e+07	2.91925e+07	2.81169e+07	2.50703e+07	2.08954e+07	1.29369e+07	2.48182e+07	2.9114e+07	2.97225e+07	2.71221e+07
argr	b3237	[k]	16.994	156		187.465	187.42	201.435				377.843		230.619		438.64	519.509	521.532	227.001		273.228	248.966		241.353	314.24	261.392	220.799	219.679	29244.6	29237.5	31423.9				58943.6		35976.5		68427.8	81043.3	81359.1	35412.1		42623.6	38838.7		37651.1	49021.5	40777.2
tldd	b3244	[r]	51.363	481		55.1114	56.2798	53.8462	54.6461	75.8714	52.1943	73.6755	51.1017	55.0986	55.3367				63.3303	73.336	68.1136	56.2477		43.0237	40.2352	49.021	42.274	43.1213	26508.6	27070.6	25900	26284.8	36494.1	25105.4	35437.9	24579.9	26502.4	26617				30461.9	35274.6	32762.7	27055.2		20694.4	19353.1	23579.1
rng	b3247	[j]	55.364	489			21.8676	21.2316		21.0826		21.9275	25.3874	21.0123	20.1738		23.3323					30.1072				20.3344	19.6977			10693.3	10382.2		10309.4		10722.6	12414.4	10275	9864.99		11409.5					14722.4				9943.52
yhde	b3248	[d]	21.515	197																				52.5908																							10360.4
mrec	b3250	[m]	39.53	367											55.1593	373.537																						20243.5	137088
mreb	b3251	[d]	36.952	347		2913.58	2939.16	2738.55	2943.87	2830.7	2982.55	2898.1	2895.46	2897.46	3091.71	3198.88	3114.99	3054.9	3124.6	3028.2	2856.79	2990.97	3247.61	2923.78	3162.92	3010.04	2843.31	2944.74	1.01101e+06	1.01989e+06	950276	1.02152e+06	982254	1.03495e+06	1.00564e+06	1.00472e+06	1.00542e+06	1.07282e+06	1.11001e+06	1.0809e+06	1.06005e+06	1.08424e+06	1.05078e+06	991306	1.03787e+06	1.12692e+06	1.01455e+06	1.09753e+06	1.04448e+06
yhdh	b3253	[cr]	34.723	324		697.169	518.885	426.828	295.991	687.902	628.305	484.566	357.658	281.994	819.317	753.064	614.941	514.521	343.251	260.625	433.406	169.099	731.912	473.764	396.756	270.453	253.628	210.255	225883	168119	138292	95901.2	222880	203571	156999	115881	91366.2	265459	243993	199241	166705	111213	84442.6	140424	54788.1	237139	153500	128549	87626.6
accb	b3255	[i]	16.687	156		1192.35	1249.37	1162.08	1070.55	1187.11	1291.32	1228.67	1187.11	1210.95	1331.71	1325.35	1410.67	1466.31	1632.58	1661.56	1571.3		1165.23	1461.93	1662.67	1609.21	1644.9	1596.02	186006	194901	181285	167007	185189	201445	191673	185190	188908	207747	206755	220065	228745	254683	259203	245123		181776	228060	259376	251036
accc	b3256	[i]	49.32	449		1066.45	1139.67	1228.23	1257.91	1081.81	1129.74	1204.67	1254.29	1303.4	1095.36	1172.63	1323.2	1445.97	1540.98	1584	1664.46	1789.42	1170.75	1385.24	1575.6	1572.78	1569.47	1668.72	478838	511710	551474	564804	485733	507254	540895	563175	585227	491817	526512	594118	649241	691902	711218	747345	803449	525666	621973	707445	706179
prma	b3259	[j]	31.877	293																								46.1732
fis	b3261	[kl]	11.24	98		609.44	974.64	1329.81	1650.19	683.434	957.627	1282.33	1536.21	1550.52	723.823	737.057	1065.66	1306.77	1697.5	1892.14	2282.66	1564.07	544.008	993.316	1581.12	1958.46	2262.87	2364.65	59725.1	95514.8	130321	161719	66976.5	93847.4	125669	150549	151951	70934.6	72231.5	104435	128063	166355	185430	223701	153279	53312.8	97345	154949	191929
yrda	b3279		20.245	184		177.31	182.716	185.753	193.739	193.758			198.726		148.912									185.867	159.725	166.136	166.703	153.537	32625	33619.8	34178.6	35647.9	35651.5			36565.6		27399.8									34199.5	29389.5	30569
aroe	b3281	[e]	29.413	272			77.9279				66.0451	69.924	68.6225		59.7238									72.3883	71.9794	68.6705	79.1033			21196.4				17964.3	19019.3	18665.3		16244.9									19689.6	19578.4	18678.4
rimn	b3282		20.767	190								111.757		117.713												140.333									21233.9		22365.4												26663.3
def	b3287	[j]	19.328	169		273.147	269.498	272.633	278.453	211.132	223.604	271.056	267.253	272.833	243.558	223.021	218.506	208.108	220.332	236.197		168.746	316.113	211.152	218.619	256.118	255.153	303.2	46161.8	45545.2	46074.9	47058.6	35681.3	37789.1	45808.4	45165.7	46108.8	41161.4	37690.6	36927.5	35170.3	37236.1	39917.3		28518	53423.2	35684.6	36946.6	43283.9
fmt	b3288	[j]	34.168	315		318.983	357.931	325.242	285.857	309.673	305.195	312.066	332.66	314.775	317.524	328.356	296.02	286.624	332.41	326.023	299.892	233.294	336.013	309.652	320.756	319.177	312.74	322.672	100480	112748	102451	90044.9	97546.9	96136.5	98300.9	104788	99154	100020	103432	93246.2	90286.6	104709	102697	94466.1	73487.6	105844	97540.5	101038	100541
mscl	b3291	[m]	14.957	136		1097.71	967.003	935.738	792.069	1062.86	937.154	878.752	860.334	760.549	1011.47	997.707	689.726	639.997	492.039	446.933	532.577		1134.99	660.886	588.133	490.987	424.917	414.62	149288	131512	127260	107721	144549	127453	119510	117005	103435	137560	135688	93802.7	87039.6	66917.3	60783	72430.5		154358	89880.4	79986.1	66774.3
rplq	b3294	[j]	14.364	127		11854	14452.8	18107.2	20301.1	12594.8	12888	15949.6	19636.2	20255.4	11646.9	12697.7	15523.9	18896.9	20936.3	24422.5	25251.4	26936.7	12252.4	17439.1	20543.7	23019.5	23773.9	26299.5	1.50546e+06	1.83551e+06	2.29961e+06	2.57824e+06	1.59954e+06	1.63678e+06	2.0256e+06	2.49379e+06	2.57243e+06	1.47915e+06	1.61261e+06	1.97153e+06	2.39991e+06	2.65892e+06	3.10165e+06	3.20692e+06	3.42096e+06	1.55606e+06	2.21476e+06	2.60905e+06	2.92347e+06
rpoa	b3295	[k]	36.511	329		10188.4	10536.6	10731	10553.7	10011.4	10061.8	10322.7	10620.1	10689.6	9428.34	9956.93	10656.2	10722.1	10661.8	10829	11000.6	11379.5	10150	10551	11029.5	10909.1	10357.6	10914.9	3.35199e+06	3.46655e+06	3.53051e+06	3.47217e+06	3.29374e+06	3.31034e+06	3.39617e+06	3.49401e+06	3.51689e+06	3.10192e+06	3.27583e+06	3.50589e+06	3.52756e+06	3.50773e+06	3.56273e+06	3.61919e+06	3.74384e+06	3.33936e+06	3.47128e+06	3.62869e+06	3.58911e+06
rpsd	b3296	[j]	23.469	206		21296.6	25662.9	30604	33676.3	21343.9	23363.5	29009.7	32836.6	34989.6	20311.6	22320	26447.9	31422.2	35091.3	39568.3	42753.8	45438.4	21758.8	29957	35040	38318.2	40010.2	42962.3	4.3871e+06	5.28657e+06	6.30442e+06	6.93731e+06	4.39684e+06	4.81289e+06	5.976e+06	6.76435e+06	7.20785e+06	4.18418e+06	4.59791e+06	5.44826e+06	6.47298e+06	7.22881e+06	8.15107e+06	8.80728e+06	9.36031e+06	4.48232e+06	6.17115e+06	7.21824e+06	7.89356e+06
rpsk	b3297	[j]	13.845	129		6963.21	8174.13	9734.67	10817.6	6955.66	6889.58	8644.45	10101.3	10806.5	6433.2	6857.13	8319.27	9538.15	10848.2	12628.5	12940.1	13545	6650.1	9236.1	10864.7	12173.5	12680.4	13886.8	898254	1.05446e+06	1.25577e+06	1.39546e+06	897280	888755	1.11513e+06	1.30307e+06	1.39403e+06	829883	884569	1.07319e+06	1.23042e+06	1.39942e+06	1.62908e+06	1.66928e+06	1.7473e+06	857862	1.19146e+06	1.40154e+06	1.57038e+06
rpsm	b3298	[j]	13.099	118		16658.6	20396.7	24363.3	26969.8	16592.1	17701.9	22031.8	25147.7	26127.3	16010.6	17055.9	20741.5	24527.5	27692.7	32172.5	32402.6	35808.8	16890.2	23518.1	27649.3	31793.2	31156.2	34594.9	1.96571e+06	2.40681e+06	2.87486e+06	3.18244e+06	1.95787e+06	2.08883e+06	2.59975e+06	2.96743e+06	3.08302e+06	1.88925e+06	2.01259e+06	2.4475e+06	2.89425e+06	3.26774e+06	3.79636e+06	3.82351e+06	4.22543e+06	1.99304e+06	2.77513e+06	3.26262e+06	3.7516e+06
rpmj	b3299	[j]	4.3643	38											1518.47	1731.81		2316.17		3044.15		3037.19																57702	65808.8		88014.5		115678		115413
secy	b3300	[u]	48.511	443		262.14	274.156	305.508	333.764	270.694	271.893	302.655	352.014	355.943	268.633	280.042	298.385	369.111	381.951	345.575	384.95	395.86	283.172	318.966	383.824	352.793	379.079	389.537	116128	121451	135340	147857	119918	120449	134076	155942	157683	119005	124059	132185	163516	169204	153090	170533	175366	125445	141302	170034	156287
rplo	b3301	[j]	14.98	144		13220.8	15505.6	19369.8	21792.7	13074.1	14129.3	17392.7	20874.4	21907.5	12584.8	13515.4	16707.4	20350.9	22376.5	25861.4	26155.2	28091.5	13106.7	19263.7	22739.1	25119.3	26347.5	28026.1	1.90379e+06	2.23281e+06	2.78925e+06	3.13816e+06	1.88267e+06	2.03462e+06	2.50454e+06	3.00591e+06	3.15467e+06	1.81222e+06	1.94622e+06	2.40586e+06	2.93053e+06	3.22221e+06	3.72404e+06	3.76635e+06	4.04518e+06	1.88737e+06	2.77397e+06	3.27443e+06	3.61717e+06
rpmd	b3302	[j]	6.5417	59		15156.9	17131.7	19588.8	20695.7	14600	17105.5	19168.3	19767.3	18454.4	15658.7	17842.9	20854.5	21739.3	25434.7	26921.2	27310.2	22792.4	14809.8	22756.5	25585.8	27576.2	27704.2	30247	894257	1.01077e+06	1.15574e+06	1.22105e+06	861397	1.00923e+06	1.13093e+06	1.16627e+06	1.08881e+06	923866	1.05273e+06	1.23042e+06	1.28262e+06	1.50065e+06	1.58835e+06	1.6113e+06	1.34475e+06	873776	1.34263e+06	1.50956e+06	1.627e+06
rpse	b3303	[j]	17.603	167		21847.2	25622.9	29869.1	33576.4	21246.5	22925	27044.5	33424.5	33962	20769.7	22126.7	27202.4	32613.2	35617	40734.7	43083.9	45893.1	21886.4	30249.8	36065.7	39813.4	40298.7	44050.5	3.64848e+06	4.27902e+06	4.98813e+06	5.60726e+06	3.54816e+06	3.82847e+06	4.51643e+06	5.58189e+06	5.67166e+06	3.46854e+06	3.69516e+06	4.5428e+06	5.4464e+06	5.94803e+06	6.80269e+06	7.19501e+06	7.66415e+06	3.65502e+06	5.05172e+06	6.02297e+06	6.64884e+06
rplr	b3304	[j]	12.769	117		9661.22	11541.1	13382.5	15056.3	9479.75	10570.4	12530.4	14415.9	14864.1	9187.19	9865.96	12202.2	13976.4	16069	18134.5	18680.6	20081.9	9794.56	13454.8	15618.1	16980.2	17816.7	18548	1.13036e+06	1.35031e+06	1.56575e+06	1.76159e+06	1.10913e+06	1.23674e+06	1.46606e+06	1.68667e+06	1.73909e+06	1.0749e+06	1.15432e+06	1.42766e+06	1.63524e+06	1.88007e+06	2.12173e+06	2.18563e+06	2.34959e+06	1.14596e+06	1.57421e+06	1.82731e+06	1.98669e+06
rplf	b3305	[j]	18.904	177		18229.9	21936.4	26102.4	28618.8	18070.7	19834.8	23527.3	27452.4	29537.7	17665.8	19145.1	23536.6	28388.2	30459.1	34670.8	36182.5	36354.9	18544	25674.8	30257.9	34348.1	35522.7	36772.4	3.2267e+06	3.88275e+06	4.62013e+06	5.06552e+06	3.19851e+06	3.51076e+06	4.16433e+06	4.85907e+06	5.22817e+06	3.12684e+06	3.38869e+06	4.16597e+06	5.02471e+06	5.39126e+06	6.13672e+06	6.4043e+06	6.43481e+06	3.28228e+06	4.54445e+06	5.35564e+06	6.07961e+06
rpsh	b3306	[j]	14.126	130		12921.6	15082.4	17823.1	19627.2	12994.9	13769.7	16086.5	18646.1	19599.1	12207.5	12459.8	15531.3	18577.4	20640.4	23413.7	25372.4	26076.2	12480	17789.8	20718.9	23090.9	23625.2	25788.6	1.67981e+06	1.96071e+06	2.31701e+06	2.55153e+06	1.68934e+06	1.79006e+06	2.09125e+06	2.42399e+06	2.54788e+06	1.58698e+06	1.61978e+06	2.01907e+06	2.41506e+06	2.68326e+06	3.04378e+06	3.29841e+06	3.3899e+06	1.6224e+06	2.31267e+06	2.69345e+06	3.00182e+06
rpsn	b3307	[j]	11.58	101		5524.87	7278.75	8557.73	9768.68	5864.02	6114.19	7406.06	9016.01	9217.76	5838.19	6249.42	7639.66	9335.96	9887.02	10993.1	11997.3	11871.2	5777.75	8084.93	10035	10976.3	11458.7	11667.8	558012	735154	864331	986637	592266	617533	748013	910617	930994	589658	631192	771606	942932	998589	1.11031e+06	1.21173e+06	1.19899e+06	583553	816578	1.01354e+06	1.10861e+06
rple	b3308	[j]	20.301	179		20183.5	24323	28575.6	31710.2	20160.8	21975.1	26952.4	30607.7	32129.2	19239.2	20875.8	25123.6	30067.7	33249.6	37361.1	38637.6	42016.1	19928.3	27897.7	33720.6	36251.8	37956.8	39892.7	3.61285e+06	4.35382e+06	5.11504e+06	5.67613e+06	3.60879e+06	3.93355e+06	4.82447e+06	5.47878e+06	5.75113e+06	3.44383e+06	3.73676e+06	4.49713e+06	5.38211e+06	5.95169e+06	6.68763e+06	6.91613e+06	7.52089e+06	3.56717e+06	4.9937e+06	6.03598e+06	6.48908e+06
rplx	b3309	[j]	11.316	104		13496.3	16357.9	20674.7	22787.2	14188.5	14541.2	17956.5	21614	22373.6	13934.9	14464.9	18660.6	21359.4	22831	27358.4	29297.4	29364.1	13886.4	19465.3	24293.6	26228.2	26938.2	29584.3	1.40362e+06	1.70122e+06	2.15017e+06	2.36987e+06	1.47561e+06	1.51229e+06	1.86747e+06	2.24785e+06	2.32685e+06	1.44923e+06	1.50435e+06	1.9407e+06	2.22137e+06	2.37443e+06	2.84527e+06	3.04693e+06	3.05387e+06	1.44419e+06	2.02439e+06	2.52653e+06	2.72774e+06
rpln	b3310	[j]	13.541	123		8571.42	10771.1	13353.2	14063.1	8767.24	9698.36	12082.6	13724.2	14140.4	8633.29	9258.57	10985.3	12641	15187.2	16619.1	17919.9	19477.9	8512.42	12275.1	15049.9	16787.4	17540.9	18665.7	1.05428e+06	1.32485e+06	1.64244e+06	1.72976e+06	1.07837e+06	1.1929e+06	1.48616e+06	1.68808e+06	1.73927e+06	1.06189e+06	1.1388e+06	1.3512e+06	1.55484e+06	1.86803e+06	2.04414e+06	2.20415e+06	2.39578e+06	1.04703e+06	1.50983e+06	1.85113e+06	2.06485e+06
rpsq	b3311	[j]	9.7043	84		8472.38	10088.8	12803.2	13948.6	8741.22	9493.66	11372.4	13603.9	14851.1	8005.49	9132.99	10555.4	13210	14039.6	16292.9	17296.7	18583.1	8749.53	12288.7	14564.8	16577.5	16149.5	18743.3	711680	847459	1.07547e+06	1.17169e+06	734263	797467	955281	1.14272e+06	1.24749e+06	672461	767171	886652	1.10964e+06	1.17933e+06	1.3686e+06	1.45292e+06	1.56098e+06	734960	1.03225e+06	1.22345e+06	1.39251e+06
rpmc	b3312	[j]	7.2734	63		16776	20029.8	23269.1	24823.6	16401.5	17529	22002.2	25012.5	26672.8	15481.7	16626.5	20091.6	23627.8	25827.3	30944.5	31900.8	34224	15412.9	22004.8	26928.2	29302.4	31448.6	32784.1	1.05689e+06	1.26188e+06	1.46595e+06	1.56389e+06	1.03329e+06	1.10433e+06	1.38614e+06	1.57579e+06	1.68039e+06	975346	1.04747e+06	1.26577e+06	1.48855e+06	1.62712e+06	1.9495e+06	2.00975e+06	2.15611e+06	971014	1.3863e+06	1.69648e+06	1.84605e+06
rplp	b3313	[j]	15.281	136		9021.3	10525.5	12768	14099.6	8909.09	9534.55	11385	13565.9	14631.6	8434.9	9030.45	10993.7	13293.5	14360.1	16678.9	17851.2	18981.7	9138.04	12186.8	14951	16452.6	16895.9	18158.9	1.2269e+06	1.43146e+06	1.73645e+06	1.91754e+06	1.21164e+06	1.2967e+06	1.54836e+06	1.84496e+06	1.9899e+06	1.14715e+06	1.22814e+06	1.49514e+06	1.80791e+06	1.95297e+06	2.26833e+06	2.42776e+06	2.58151e+06	1.24277e+06	1.6574e+06	2.03334e+06	2.23756e+06
rpsc	b3314	[j]	25.983	233		16364.4	20136.5	24491.6	26956	16579.1	17585.2	22066.6	26388.5	27005.4	15817.8	17726.7	21106.1	25798.2	27950.2	31822.9	33585.1	36349.3	16750.7	23481.7	28235.4	30885.5	31742.6	34981.9	3.8129e+06	4.6918e+06	5.70654e+06	6.28074e+06	3.86293e+06	4.09734e+06	5.14152e+06	6.14852e+06	6.29226e+06	3.68555e+06	4.13033e+06	4.91773e+06	6.01099e+06	6.5124e+06	7.41474e+06	7.82532e+06	8.46939e+06	3.90292e+06	5.47123e+06	6.57886e+06	7.19631e+06
rplv	b3315	[j]	12.226	110		20437.4	24641.5	28324.6	31369	20262.2	21536.5	26756.4	30837.4	32104.7	19360.6	21308.4	25988.5	30746.4	32749.7	37678.4	39521.4	42590.8	20119	28232.6	33089.6	36822.4	38055.9	40513	2.24811e+06	2.71057e+06	3.11571e+06	3.45059e+06	2.22885e+06	2.36901e+06	2.9432e+06	3.39212e+06	3.53152e+06	2.12967e+06	2.34392e+06	2.85874e+06	3.3821e+06	3.60246e+06	4.14462e+06	4.34735e+06	4.68499e+06	2.21308e+06	3.10558e+06	3.63985e+06	4.05047e+06
rpss	b3316	[j]	10.43	92		9248.35	10988.6	13108.2	14977.2	9519.3	10231.4	12424.8	14351.7	15248.7	9109.8	9857.37	11458	13810.5	15820.3	18588.4	19324.9	20272.6	9816.28	13557.8	15985.1	17672.5	18405	19464.6	850848	1.01095e+06	1.20595e+06	1.37791e+06	875776	941291	1.14308e+06	1.32036e+06	1.40288e+06	838102	906878	1.05414e+06	1.27057e+06	1.45547e+06	1.71013e+06	1.77789e+06	1.86508e+06	903097	1.24732e+06	1.47063e+06	1.62587e+06
rplb	b3317	[j]	29.86	273		11476.5	14121.2	17284.2	19184.1	11453.9	12486.8	15799.4	18429.3	19313.6	10898.3	11543.1	14544.6	17705.3	19356.8	22771.7	23789.8	25722.5	11237.4	16281.2	19362.8	21942	22520.6	24895.6	3.13307e+06	3.85509e+06	4.71858e+06	5.23727e+06	3.12693e+06	3.4089e+06	4.31324e+06	5.03119e+06	5.27262e+06	2.97524e+06	3.15126e+06	3.97068e+06	4.83356e+06	5.28442e+06	6.21668e+06	6.49463e+06	7.02225e+06	3.06781e+06	4.44476e+06	5.28606e+06	5.99017e+06
rplw	b3318	[j]	11.199	100		2959.36	3575.49	3898.21	4598.43	3465.57	2950.8	3921.29	4445.31	4352.01	2872.67	2958.99	3722.65	4440.77	4885.47	5416.92	6034.32	6272.74	2846.45	3921.49	5124.59	5496.21	5809.42	5963.31	295936	357549	389821	459843	346557	295080	392129	444531	435201	287267	295899	372265	444077	488547	541692	603432	627274	284645	392149	512459	549621
rpld	b3319	[j]	22.086	201		14962.5	18206.6	21588	24177	14849.9	16466.2	19780.4	23371.7	24048.9	14196	14991	18793.4	21876.7	25176.5	28898.5	30154.6	32651.1	14329.5	21227.9	25134.2	27659.6	28464.7	30793.8	3.00746e+06	3.65953e+06	4.33919e+06	4.85957e+06	2.98482e+06	3.30971e+06	3.97586e+06	4.69771e+06	4.83383e+06	2.85339e+06	3.0132e+06	3.77748e+06	4.39721e+06	5.06047e+06	5.8086e+06	6.06108e+06	6.56287e+06	2.88024e+06	4.26681e+06	5.05198e+06	5.55958e+06
rplc	b3320	[j]	22.243	209		12513.2	15268	18028.9	19924	12498.1	13313.3	16402	19547.4	20153.4	12078.4	13050.9	16065.2	18923.7	20956.1	24883.8	26056.8	27975.5	12339.3	18138.7	21127	23845.2	24054.6	25751.9	2.61525e+06	3.19101e+06	3.76803e+06	4.16411e+06	2.61209e+06	2.78247e+06	3.42802e+06	4.0854e+06	4.21206e+06	2.52438e+06	2.72763e+06	3.35762e+06	3.95506e+06	4.37982e+06	5.20072e+06	5.44587e+06	5.84687e+06	2.57892e+06	3.79099e+06	4.41554e+06	4.98364e+06
rpsj	b3321	[j]	11.735	103		20575.4	24586.7	28311.9	32354.2	20628.5	21864	26049.5	30709.5	32135.8	19931.3	20991	25533.1	30073.1	32822.8	37959	41176.4	42808.1	20270.8	29144.1	33315.9	37160	38508.4	40909.1	2.11927e+06	2.53243e+06	2.91613e+06	3.33248e+06	2.12474e+06	2.25199e+06	2.6831e+06	3.16307e+06	3.30999e+06	2.05293e+06	2.16207e+06	2.62991e+06	3.09752e+06	3.38075e+06	3.90978e+06	4.24117e+06	4.40923e+06	2.08789e+06	3.00184e+06	3.43154e+06	3.82748e+06
gsph	b3329	[nu]	18.565	169
bfr	b3336	[p]	18.495	158		7778.03	5203.13	3741.5	2289.86	8155.94	6253.47	4040.51	3083.17	2504.9	9731.24	8798.89	6268.63	3523.59	2703.03	1687.91	1336.36	656.289	10168.9	4512.23	3081.52	2140.29	1343.26	1300.11	1.22893e+06	822095	591157	361799	1.28864e+06	988048	638401	487142	395774	1.53754e+06	1.39022e+06	990443	556728	427079	266689	211146	103694	1.60668e+06	712932	486880	338166
tufa	b3339	[j]	43.283	394		100089	107791	109383	108362	102356	104616	108722	109401	111842	116000	121854	123299	129101	128023	127395	122895	123655	125228	126731	131106	126540	124835	127955	3.9435e+07	4.24697e+07	4.30967e+07	4.26945e+07	4.03284e+07	4.12185e+07	4.28365e+07	4.31039e+07	4.40657e+07	4.5704e+07	4.80104e+07	4.858e+07	5.08658e+07	5.04409e+07	5.01938e+07	4.84205e+07	4.87201e+07	4.93397e+07	4.9932e+07	5.16559e+07	4.98566e+07
fusa	b3340	[j]	77.58	704		15321.1	17577.2	19212.6	19719.8	15274.6	16185.4	18077.5	20681.2	20297.2	16516.8	17428.5	18187.3	19524.6	20134.2	19791.4	20137.8	21176.8	19705.1	20681.7	21980.7	21532.6	19993.2	22810.7	1.07861e+07	1.23743e+07	1.35256e+07	1.38828e+07	1.07533e+07	1.13946e+07	1.27266e+07	1.45596e+07	1.42893e+07	1.16278e+07	1.22696e+07	1.28039e+07	1.37453e+07	1.41745e+07	1.39332e+07	1.4177e+07	1.49084e+07	1.38724e+07	1.45599e+07	1.54744e+07	1.51589e+07
rpsg	b3341	[j]	20.019	179		22458.3	27481.9	32064.2	36167	22653.3	24345.3	29837.9	34070.9	36342	22006.3	23192	28611	33344.9	37492.1	42624.2	44348.2	47076.8	22243.5	31295.3	37296.5	41681.1	42114.8	45350.4	4.02003e+06	4.91925e+06	5.7395e+06	6.47389e+06	4.05494e+06	4.35781e+06	5.34098e+06	6.0987e+06	6.50522e+06	3.93913e+06	4.15137e+06	5.12136e+06	5.96874e+06	6.71109e+06	7.62973e+06	7.93834e+06	8.42674e+06	3.9816e+06	5.60186e+06	6.67607e+06	7.46092e+06
rpsl	b3342	[j]	13.737	124		6062.82	7298.89	8552.82	9737.2	6223.96	6648.21	8028.37	9067.19	9606.8	5745.35	6272.52	7608.15	8862.39	9859.63	11577.7	11704.9	12387	6105.76	8368.58	9675.26	10769.9	11501.2	12436.8	751790	905062	1.06055e+06	1.20741e+06	771772	824378	995518	1.12433e+06	1.19124e+06	712423	777792	943411	1.09894e+06	1.22259e+06	1.43563e+06	1.45141e+06	1.53599e+06	757114	1.0377e+06	1.19973e+06	1.33546e+06
yheo	b3346		26.82	240		277.663	256.397	215.909	197.103	268.242	247.823	257.917	207.789	190.63	253.161	217.601	271.952	219.452	222.983	179.688	299.619	189.75	275.423	243.094	199.173	193.334	207.793	166.217	66639.1	61535.3	51818.2	47304.6	64378.1	59477.6	61900	49869.4	45751.2	60758.6	52224.2	65268.5	52668.5	53515.9	43125.2	71908.5	45540	66101.6	58342.6	47801.6	46400.2
fkpa	b3347	[o]	28.882	270		2139.84	2172.75	2258.96	2436.07	2166.05	2172.94	2243.57	2278.42	2384.12	2474.82	2439.47	2556.8	2768.33	2767.61	2963.36	2854.28	2415.82	2511.2	2660.43	2806.53	2902.9	3967.99	2804.52	577757	586643	609920	657740	584835	586693	605763	615175	643711	668202	658657	690337	747449	747256	800107	770654	652273	678025	718316	757763	783783
slyd	b3349	[o]	20.853	196		756.897	743.362	805.213	652.98	718.499	750.99	746.449	726.147	763.732	749.83	775.941	720.41		695.242	755.065		645.995	785.046	721.282	847.639	739.293	711.677	742.675	148352	145699	157822	127984	140826	147194	146304	142325	149691	146967	152084	141200		136268	147993		126615	153869	141371	166137	144902
yhes	b3352	[r]	71.843	637		27.8388	27.3899	25.83	29.3714	23.8784	20.2867	20.6377	24.6574	39.7661		25.6968		23.9975		28.2466	29.8317		23.9458	26.4419	22.5589	22.9229	27.1946	33.0363	17733.3	17447.3	16453.7	18709.6	15210.5	12922.6	13146.2	15706.8	25331		16368.9		15286.4		17993.1	19002.8		15253.5	16843.5	14370	14601.9
yhfa	b3356	[o]	14.517	134		251.285	259.973	203.888	206.037	203.648	225.363	206.295	192.796	189.437	190.329	190.901	201.561	177.354	153.561	124.893	134.549		174.79	152.134	148.03	137.745	149.79	276.304	33672.2	34836.4	27320.9	27609	27288.8	30198.7	27643.6	25834.6	25384.5	25504	25580.7	27009.2	23765.5	20577.1	16735.7	18029.6		23421.9	20386	19836	18457.9
crp	b3357	[t]	23.64	210		9933.43	8931.57	7237.05	5834.39	9621.58	9238.34	7516.85	6284.76	5718.19	10051.1	10176.2	9148.14	8176.64	7154.12	6568.6	5645.95	4783.62	11093.3	8897.61	7585.98	6579.57	5434.03	5240.87	2.08602e+06	1.87563e+06	1.51978e+06	1.22522e+06	2.02053e+06	1.94005e+06	1.57854e+06	1.3198e+06	1.20082e+06	2.11072e+06	2.137e+06	1.92111e+06	1.71709e+06	1.50237e+06	1.37941e+06	1.18565e+06	1.00456e+06	2.32958e+06	1.8685e+06	1.59306e+06	1.38171e+06
argd	b3359	[e]	43.766	406		951.887	1139.83	1230.88	1422.16	982.666	1044.8	1065.23	1362.43	1490.52	595.644	633.568	860.894	1086	1273.53	1361.25	1421.15	1621.56	697.766	937.838	1193.75	1395	1507.78	1568.25	386466	462772	499738	577398	398962	424188	432483	553147	605150	241831	257229	349523	440914	517053	552667	576988	658355	283293	380762	484662	566371
ppia	b3363	[o]	20.431	190		808.043	627.862	487.848		606.855	630.507	600.736	471.894	533.636	912.345	559.421			926.147					1035.01	807.859	649.992	1007.81	675.918	153528	119294	92691.2		115303	119796	114140	89659.8	101391	173345	106290			175968					196652	153493	123498
yhfw	b3380	[g]	44.559	408		448.717										507.381							541.97						183076										207012							221124
trps	b3384	[j]	37.437	334		1338.16	1336.87	1338.41	1533.51	1358.04	1391.64	1354.55	1439.34	1517.35	1232.37	1259.33	1359.75	1347.81	1476.24	1465.76	1448.79	1554.67	1333.74	1437.04	1468.96	1419.75	1443.02	1465.61	446944	446515	447028	512191	453586	464807	452418	480739	506796	411610	420615	454156	450167	493063	489565	483896	519258	445471	479973	490634	474197
gph	b3385	[r]	27.389	252		137.022	140.793	145.311		137.204		156.181	180.806	151.589	161.441									158.525	173.915	167.506	166.34	152.135	34529.6	35479.9	36618.4		34575.3		39357.6	45563	38200.5	40683.1									39948.4	43826.7	42211.5
rpe	b3386	[g]	24.554	225		734.608	728.596	690.971	543.608	756.578	708.249	720.41	621.64	533.856	681.638	733.409	689.673	683.072	556.439	523.794	525.423	505.942	768.815	693.663	579.504	597.238	614.02	551.787	165287	163934	155469	122312	170230	159356	162092	139869	120118	153369	165017	155176	153691	125199	117854	118220	113837	172983	156074	130388	134379
damx	b3388	[s]	46.161	428		303.389	278.869	274.965	289.855	297.795	296.698	282.188	288.434	297.2	265.249	258.914	262.051	247.225	249.065	269.13	273.489	286.554	289.707	241.559	247.141	246.302	268.993	277.17	129850	119356	117685	124058	127456	126987	120777	123450	127202	113527	110815	112158	105812	106600	115188	117053	122645	123994	103387	105776	105417
arob	b3389	[e]	38.881	362		434.357	410.132	373.04	313.681	445.458	400.711	364.473	338.939	319.733	418.747	444.242	399.595	365.839	390.897	310.079	256.849	255.144	416.776	380.282	335.648	316.753	281.256	282.623	157237	148468	135040	113552	161256	145057	131939	122696	115743	151587	160815	144654	132434	141505	112249	92979.4	92362.1	150873	137662	121505	114665
arok	b3390		19.538	173		405.226	477.495	496.863	551.269	413.586	466.169	494.875	530.593	588.601	388.517	475.089	547.944	591.995	607.227	742.92	652.419	511.745		564.115	617.465	655.821	661.282	672.716	70104.1	82606.7	85957.3	95369.5	71550.3	80647.3	85613.4	91792.7	101828	67213.5	82190.5	94794.3	102415	105050	128525	112869	88531.9		97591.9	106821	113457
mrca	b3396	[m]	93.635	850		31.6148	25.373	27.526	29.9839		31.227	24.5719	29.8425	25.5554	23.9687						24.4144			27.8915		23.2924		25.1801	26872.6	21567	23397.1	25486.4		26542.9	20886.1	25366.1	21722.1	20373.4						20752.2			23707.8		19798.5
nude	b3397	[lr]	21.153	186			106.873			127.294	113.977	123.021		96.7117										101.169				73.6781		19878.5			23676.6	21199.6	22881.8		17988.4										18817.4
yrff	b3398		79.489	711			24.9403	20.8025	44.4964			35.2339	22.3747											44.0093		30.7776	19.0786	21.6935		17732.6	14790.6	31636.9			25051.3	15908.4											31290.6		21882.9
hslo	b3401	[o]	32.534	292		328.105	324.63	273.112	308.256	305.175	341.538	283.616	298.383	275.394	350.311	333.234	320.016	352.907	355.998	368.82	346.672	347.345	335.857	355.548	394.264	379.538	331.505	359.128	95806.8	94791.9	79748.6	90010.7	89111.2	99729.1	82815.8	87128	80414.9	102291	97304.2	93444.8	103049	103951	107695	101228	101425	98070.4	103820	115125	110825
pck	b3403	[c]	59.643	540		11088.8	9945.63	6431.19	2851.81	10183.7	9434.45	7162.39	4489.64	2655.99	11487.3	9410.84	8651.56	6966.27	5825.82	5673.46	5178.72	2794.86	4636.26	9925.71	9781.47	7070.06	5958.47	4452.22	5.98796e+06	5.37064e+06	3.47284e+06	1.53998e+06	5.49921e+06	5.0946e+06	3.86769e+06	2.4244e+06	1.43423e+06	6.20313e+06	5.08186e+06	4.67184e+06	3.76179e+06	3.14594e+06	3.06367e+06	2.79651e+06	1.50922e+06	2.50358e+06	5.35988e+06	5.28199e+06	3.81783e+06
ompr	b3405	[tk]	27.353	239		1353.38	1339.38	1020.45	737.469	1697.95	1478.2	1146.28	895.323	742.931	2077.81	1741.49	1496.42	1357.38	987.216	902.361	664.046		1837.44	1394.2	1127.74	876.815	793.034	594.161	323458	320111	243887	176255	405810	353289	273961	213982	177560	496596	416215	357644	324415	235945	215664	158707		439148	333213	269529	209559
yhgf	b3407		85.119	773		232.501	254.055	270.733	314.799	239.737	219.328	271.315	306.89	319.762	220.665	258.987	288.418	298.58	339.18	358.677	390.302	426.509	325.377	306.837	355.148	364.78	358.212	403.308	179723	196385	209276	243339	185316	169540	209726	237226	247176	170574	200197	222947	230803	262186	277257	301704	329692	251516	237185	274529	281975
feob	b3409	[p]	84.473	773
nfua	b3414		20.997	191		2325.03	2202.31	2314.02	2168.08	2185.74	2404.5	2128.86	2121.95	2121.14	2383.32	2491.45	2561.1	2486.54	2590.56	2346.6	2162.84	1993.43	2494.47	2374.29	2426.45	2312.83	2378.51	2230.06	444081	420641	441978	414103	417477	459259	406612	405293	405137	455215	475866	489170	474929	494797	448200	413103	380746	476444	453490	463452	441751
malq	b3416	[g]	78.503	694		37.7933	38.2958	40.0364	31.6231	66.0304	41.8243	52.7935			33.1316	32.0661					31.9745			69.6432	79.596	52.964	48.827	47.0956	26228.5	26577.3	27785.2	21946.4	45825.1	29026.1	36638.7			22993.3	22253.9					22190.3			48332.4	55239.6	36757
malp	b3417		90.521	797		538.764	554.533	622.435	545.026	543.879	550.586	617.793	633.807	584.891	505.372	577.314	869.856	1074.07	1033.28	1086.32	1007.51	663.354	541.809	1012.58	1221.64	1148.3	1082.27	749.124	429395	441963	496081	434385	433472	438817	492381	505144	466158	402781	460119	693275	856032	823522	865794	802989	528693	431821	807030	973646	915198
malt	b3418	[k]	103.12	901		90.2861	196.332	48.3265		339.547	479.157	271.429		56.9512	205.714	78.3486	72.4894				67.6838			399.581	341.501	286.553	68.907	73.5002	81347.7	176895	43542.2		305932	431720	244558		51313	185348	70592.1	65313				60983.1			360022	307692	258184
glpr	b3423	[kg]	28.048	252		44.7029	50.026			48.1636	24.2892	42.7279	43.9717		53.9384									48.3791	51.3995	50.554	46.4427		11265.1	12606.5			12137.2	6120.87	10767.4	11080.9		13592.5									12191.5	12952.7	12739.6
glgp	b3428	[g]	93.171	815		114.44	111.214	97.3473	91.2769	132.288	115.763	94.3807	90.6438	75.211	124.625	108.934	105.158	79.463	58.3534	55.3027	54.8002	49.1427	100.403	95.9497	80.9906	78.2109	56.1212	56.8767	93268.5	90639.1	79338	74390.7	107815	94347.1	76920.3	73874.7	61297	101570	88781.1	85704	64762.3	47558	45071.7	44662.2	40051.3	81828.7	78199	66007.4	63741.9
glga	b3429	[g]	52.822	477		308.514	281.399	280.349	251.125	321.665	302.302	275.799	274.874	243.52	295.8	298.429	257.292	214.02	171.989	148.233	153.503	126.196	320.264	235.826	208.28	189.096	145.943	128.113	147161	134227	133727	119787	153434	144198	131556	131115	116159	141097	142350	122728	102087	82039	70707	73220.7	60195.6	152766	112489	99349.4	90198.6
glgc	b3430	[g]	48.697	431		195.727	185.452	185.8	160.039	234.388	206.018	204.056	177.765	171.343	210.807		206.014						196.029	172.809	144.069	110.385	101.395	96.7669	84358.4	79929.9	80079.8	68976.8	101021	88793.8	87948	76616.8	73848.8	90857.8		88792.1						84488.5	74480.5	62093.6	47576.1
glgx	b3431	[g]	73.576	657		32.8253					27.7804																		21566.2					18251.7
glgb	b3432	[g]	84.336	728				50.6237		47.0916	28.9395	35.6761	42.1539	29.0898	45.677						23.4844				54.8262	49.0223		35.2616			36854.1		34282.6	21068	25972.2	30688.1	21177.4	33252.8						17096.6				39913.5	35688.2
asd	b3433	[e]	40.017	367		4420.23	5216.03	5879.36	7695.02	4578.82	4765.61	5499.26	6778.71	7570.56	2832.04	3007.25	3403.81	3424.61	3561.91	3619.38	3811.7	3495.84	3178.61	3506.5	3715.02	3628.32	3629.76	3585.92	1.62223e+06	1.91428e+06	2.15772e+06	2.82407e+06	1.68043e+06	1.74898e+06	2.01823e+06	2.48778e+06	2.77839e+06	1.03936e+06	1.10366e+06	1.2492e+06	1.25683e+06	1.30722e+06	1.32831e+06	1.39889e+06	1.28297e+06	1.16655e+06	1.28689e+06	1.36341e+06	1.33159e+06
gntr	b3438		36.422	331			26.1338	21.5686				22.2106			27.194															8650.27	7139.22				7351.71			9001.23
yhhw	b3439	[r]	26.279	231						9.98398					14.3655																		2306.3					3318.43
yhhx	b3440	[r]	38.765	345		199.467	195.189	183.268	203.407	208.233	194.311	195.72	213.708	181.548	191.365	158.436	184.888	156.462	144.952	143.664	155.281	168.813	216.655	188.005	168.739	163.681	176.972	158.503	68816.2	67340.1	63227.4	70175.3	71840.5	67037.2	67523.5	73729.2	62634.1	66021	54660.4	63786.3	53979.4	50008.6	49564	53572	58240.5	74746	64861.7	58215.1	56470.1
ggt	b3447	[e]	61.767	580			79.611		52.3451	75.6242		71.7648			81.5889		54.159	49.522			27.859		70.7809	60.0566	52.2326		73.543	45.3015		46174.4		30360.2	43862.1		41623.6			47321.5		31412.2	28722.7			16158.2		41052.9	34832.8	30294.9
yhha	b3448		16.624	146		124.664	89.5013	88.2683	71.61				72.1755		175.465												54.589		18200.9	13067.2	12887.2	10455.1				10537.6		25617.9
ugpq	b3449	[c]	27.409	247																						82.4788		73.7281																					20372.3
ugpc	b3450	[g]	39.523	356
ugpb	b3453	[g]	48.448	438		1002.49	605.385	293.205	145.761	969.731	694.25	405.718	228.666	142.071	1254.07	983.443	577.569	324.577	175.099		114.204		749.827	480.165	266.245	140.698	209.997	102.264	439090	265159	128424	63843.1	424742	304082	177705	100156	62226.9	549285	430748	252975	142165	76693.2		50021.3		328424	210312	116615	61625.6
livf	b3454		26.31	237		266.902	294.441	225.637	201.716	260.642	258.412	289.012	222.767	210.353	304.744	312.681	355.315	376.421	321.071	384.822	234.494	265.828		328.088	311.255	279.193	246.022	193.986	63255.8	69782.5	53476.1	47806.6	61772.2	61243.6	68495.9	52795.9	49853.7	72224.4	74105.3	84209.7	89211.9	76093.9	91202.7	55575.1	63001.3		77756.8	73767.4	66168.8
livg	b3455	[e]	28.427	255		297.184	314.513	272.523	225.184	302.583	317.409	317.808	275.577	299.611	350.429	423.511	383.183	407.893	394.786	332.061	332.162	237.768	383.749	374.43	352.872	339.059	320.394	225.399	75782	80200.7	69493.4	57421.8	77158.7	80939.4	81041	70272	76400.7	89359.3	107995	97711.6	104013	100670	84675.5	84701.4	60630.9	97856.1	95479.6	89982.3	86460
livm	b3456	[e]	46.269	425												27.2536										38.1036													11582.8										16194
livk	b3458	[e]	39.378	369		1167.71	1515.2	1350.47	1328.02	1155.6	1363.09	1378.62	1274.97	1405.94	1466.51	1335.11	1554.68	2179.22	2238.47	2157.87	1838.72	337.13	1149.5	1838.45	1936.48	2021.8	4120.48	1416.68	430886	559109	498324	490038	426418	502979	508712	470466	518793	541141	492654	573677	804133	825995	796255	678486	124401	424165	678389	714559	746045
livj	b3460		39.076	367		26088.7	24080.1	15774.2	11504	24627.1	25640.4	19863.5	12734.8	11100.9	24450.6	19517.3	15715.2	15823.9	10385	6947.49	4164.87	552.999	20377.5	15125	11717.6	8153.06	10125	3234.81	9.57454e+06	8.8374e+06	5.78913e+06	4.22196e+06	9.03814e+06	9.41001e+06	7.28992e+06	4.67369e+06	4.07403e+06	8.97337e+06	7.16283e+06	5.76749e+06	5.80736e+06	3.81129e+06	2.54973e+06	1.52851e+06	202951	7.47853e+06	5.55088e+06	4.30034e+06	2.99217e+06
ftsx	b3462	[d]	38.543	352		49.8345	49.673	55.4493	47.7635	56.9936		65.6867	52.0991	50.6548	60.3242				42.0591					40.1988	51.2416	43.5139	41.4098	44.5008	17541.7	17484.9	19518.1	16812.7	20061.8		23121.7	18338.9	17830.5	21234.1				14804.8					14150	18037	15316.9
ftse	b3463	[d]	24.439	222		719.741	620.284	579.745	567.8	622.717	687.749	587.294	606.489	578.176	616.158	864.505	886.119	613.161	471.57	475.783	594.528	466.545	738.685	557.376	573.516	502.494	571.01	508.594	159782	137703	128703	126052	138243	152680	130379	134640	128355	136787	191920	196718	136122	104689	105624	131985	103573	163988	123737	127320	111554
ftsy	b3464	[u]	54.513	497		347.317	330.084	315.592	304.564	332.932	343.979	350.922	327.983	323.212	337.058	368.555	319.119	353.643	314.723	279.509	314.738	346.858	372.342	316.066	306.93	315.569	302.524	303.069	172617	164052	156849	151368	165467	170958	174408	163008	160637	167518	183172	158602	175761	156417	138916	156425	172389	185054	157085	152544	156838
znta	b3469	[p]	76.839	732		212.498	178.975	210.545	610.77	421.362	212.006	185.562	538.888	487.359	133.421	124.312	119.867							120.518	242.273	163.849	190.381	167.218	155549	131010	154119	447084	308437	155189	135832	394466	356747	97664.5	90996.2	87742.8							88219.2	177344	119937
dcrb	b3472		19.787	185		1517.84	1610.33	1571.01	1544.99	1485.57	1480.92	1425.3	1468.26	1653.8	1501.47	1527.2	1811.05	1741.42	1700.3	1686.61	1800.7	1669.48	1556.97	1708.17	1663.61	1831.16	1698.35	1714.82	280800	297910	290637	285823	274830	273970	263681	271627	305952	277772	282533	335044	322162	314556	312023	333130	308854	288039	316012	307767	338765
nikr	b3481	[k]	15.094	133						174.098	116.004	172.653	144.892											112.62	93.831								23155.1	15428.6	22962.9	19270.6											14978.4	12479.5
rbba	b3486	[v]	100.78	911																	8.17348						10.8536	12.2695																7446.04
yhii	b3487	[m]	38.828	355		248.509	289.383	327.472	316.506	258.591	296.709	324.643	299.569	302.384	260.498		251.024	270.934	383.204	366.74	406.756	335.125		311.897	388.852	411.93	366.776	407.628	88220.7	102731	116253	112360	91800	105332	115248	106347	107346	92476.8		89113.7	96181.6	136037	130193	144398	118969		110723	138042	146235
pita	b3493	[p]	53.388	499		94.8349	116.892	124.923	123.973	98.8968	116.368	112.962	123.974	116.717	118.205	125.282	126.282	142.73		142.434	153.233	176.624		132.043	146.575	138.072	148.645	167.115	47322.6	58329	62336.7	61862.5	49349.5	58067.8	56367.9	61863.3	58241.8	58984.3	62515.5	63014.5	71222.3		71074.7	76463.3	88135.4		65889.6	73140.9	68898
uspa	b3495	[t]	16.066	144		33373.7	28431.6	22913.1	17177.2	32446.9	28301.9	24728.4	20834.9	16916.3	34298.6	30972.4	24651	18862.3	15487.6	11374.4	11066.5	9477.05	36491.1	21107.1	17024.7	13466.9	11729.9	10988.3	4.80581e+06	4.09415e+06	3.29949e+06	2.47352e+06	4.67235e+06	4.07547e+06	3.56089e+06	3.00022e+06	2.43595e+06	4.939e+06	4.46003e+06	3.54974e+06	2.71617e+06	2.23021e+06	1.63792e+06	1.59358e+06	1.3647e+06	5.25471e+06	3.03942e+06	2.45156e+06	1.93924e+06
prlc	b3498	[e]	77.166	680		518.483	482.197	491.909	471.522	468.503	458.852	496.808	497.88	486.297	479.581	443.003	443.085	468.255	446.591	438.644	433.626	435.957	502.868	481.355	465.874	446.967	440.935	435.007	352568	327894	334498	320635	318582	312020	337829	338558	330682	326115	301242	301298	318413	303682	298278	294866	296451	341950	327321	316794	303938
yhir	b3499	[r]	31.941	280						326.764	243.451				262.805																		91494	68166.4				73585.4
gor	b3500	[c]	48.772	450		481.47	448.151	381.731	377.053	439.401	434.853	411.48	388.667	366.647	491.886	518.352	432.483	444.154	400.726	342.982	311.078	400.455	585.228	466.608	413.671	383.665	336.161	341.808	216661	201668	171779	169674	197731	195684	185166	174900	164991	221349	233258	194618	199869	180327	154342	139985	180205	263352	209974	186152	172649
slp	b3506		20.964	188		1159.79	878.193	947.753	1073.92	1100.67	826.372	635.503	994.719	703.473	3388.8	1580.83	1419.75	1066.58	523.74	534.583		737.417	2193.25	1059.07	1194.6	899.096	545.458	656.916	218040	165100	178178	201898	206926	155358	119475	187007	132253	637094	297196	266914	200518	98463.1	100502		138634	412330	199106	224586	169030
hdeb	b3509		12.043	108		1004.67		438.442	436.431	828.425	742.135	502.108	489.747		2193.46	1216.59	510.487		334.484	173.829			1686.85	574.369					108504		47351.8	47134.6	89469.9	80150.6	54227.7	52892.6		236893	131392	55132.6		36124.3	18773.6			182180	62031.8
hdea	b3510		11.857	110		2412.24	1458.7	1072.9	1064.14	2148.2	1619.73	1276.22	1094.19	967.315	5560.06	3504.2	2245.67			684.349	448.039		5228.58	1622.44	1258.19	807.495		521.147	265346	160457	118019	117056	236302	178171	140384	120361	106405	611606	385462	247024			75278.4	49284.3		575144	178468	138401	88824.5
gada	b3517	[e]	52.685	466											408.15																							190198
yhje	b3523	[gepr]	47.207	440		32.8454	42.8119	48.9309	53.9845	33.598	37.0134	43.6365	58.1009	62.7159										19.0001			22.1027	18.6741	14452	18837.2	21529.6	23753.2	14783.1	16285.9	19200	25564.4	27595										8360.05
kdgk	b3526	[g]	33.962	309		35.4505				42.2956	40.137				41.673	40.929	45.5853		40.3464									31.2488	10954.2				13069.3	12402.3				12876.9	12647.1	14085.8		12467
dcta	b3528	[c]	45.436	428		1212.13	1134.98	541.928	229.207	1015.87		575.292			1961.94	1127.25	1100.4	622.751		520.583	69.6062			545.581	1370.02	894.207	842.989	456.609	518793	485771	231945	98100.5	434793		246225			839708	482461	470972	266538		222809	29791.5			233509	586369	382721
bcsc	b3530		127.72	1157						56.1437	138.949	161.284		174.355		123.649	136.42	169.935	135.393	142.412	156.105	128.337	161.169	92.3231									64958.2	160764	186606		201728		143061	157838	196615	156649	164770	180614	148486	186472	106818
dppf	b3540	[e]	37.56	334		558.415	637.361	525.163	450.169	578.142	596.563	648.712	514.128	493.376	906.961	871.303	933.884	903.175	718.152	705.258	585.368	442.681	884.089	945.077	836.778	679.924	635.678	577.748	186511	212879	175404	150356	193099	199252	216670	171719	164788	302925	291015	311917	301661	239863	235556	195513	147856	295286	315656	279484	227095
dppd	b3541	[ep]	35.844	327		492.204	496.403	464.797	376.801	471.646	447.688	471.33	409.872	407.543	736.108	805.026	818.13	802.871	729.695	604.239	602.873	477.83	651.978	726.361	700.51	579.198	509.089	479.915	160951	162324	151989	123214	154228	146394	154125	134028	133266	240707	263243	267529	262539	238610	197586	197139	156250	213197	237520	229067	189398
dppc	b3542	[ep]	32.308	300						34.9167		35.5523			63.6003																		10475		10665.7			19080.1
dppb	b3543	[ep]	37.497	339						38.7233		38.5339		35.6241		60.7051						25.299			40.7632								13127.2		13063		12076.6		20579						8576.36			13818.7
dppa	b3544	[e]	60.293	535		15422.7	14251.3	10080.6	6340.27	15480.1	14827.4	12199.5	8232.06	6272.57	28209	26575	23000.7	20263.2	14318.2	9645.43	6904.87	1895.69	27907	19999	15480.4	10435.3	11837.9	5581.54	8.25116e+06	7.62442e+06	5.39315e+06	3.39204e+06	8.28188e+06	7.93268e+06	6.52674e+06	4.40415e+06	3.35583e+06	1.50918e+07	1.42176e+07	1.23054e+07	1.08408e+07	7.66026e+06	5.16031e+06	3.6941e+06	1.01419e+06	1.49302e+07	1.06994e+07	8.28201e+06	5.58287e+06
ghrb	b3553		35.395	324		369.628	428.86	445.621	471.12	368.795	385.695	429.065	449.465	480.138	267.545	310.709	330.196	338.395	358.647	318.249	341.517	308.416	303.366	337.781	349.52	343.014	314.855	258.611	119759	138951	144381	152643	119490	124965	139017	145627	155565	86684.7	100670	106984	109640	116202	103113	110652	99926.7	98290.7	109441	113245	111137
yiaf	b3554		25.663	236		539.237	475.802	543.27	537.934	581.459	508.248	520.282	552.003	544.361	525.983	504.27	573.974			513.901	656.28	631.733	510.467	568.634	550.057	475.528	503.977	499.465	127260	112289	128212	126952	137224	119946	122786	130273	128469	124132	119008	135458			121281	154882	149089	120470	134198	129813	112225
cspa	b3556	[k]	7.4032	70					2313.66	400.365	463.971		588.817	712.363		349.499	471.417	539.528	634.259	513.628	627.121	624.094	594.098		489.858	2328.53						161956	28025.6	32478		41217.2	49865.4		24464.9	32999.2	37767	44398.2	35954	43898.5	43686.6	41586.8		34290	162997
glys	b3559	[j]	76.812	689		1817.17	1886.57	1979.64	2004.43	1874.43	1832.27	1957.62	2000.89	2047.13	1759.91	1813.51	1884.29	1914.34	1933.64	1994.07	1919.19	2172.85	2016.22	1893.28	1932.53	1891.98	1915.19	2058.72	1.25203e+06	1.29985e+06	1.36397e+06	1.38105e+06	1.29148e+06	1.26243e+06	1.3488e+06	1.37862e+06	1.41047e+06	1.21258e+06	1.24951e+06	1.29827e+06	1.31898e+06	1.33228e+06	1.37391e+06	1.32232e+06	1.49709e+06	1.38918e+06	1.30447e+06	1.33151e+06	1.30357e+06
glyq	b3560	[j]	34.774	303		999.706	1108.6	1101.23	1144.18	1099.09	1027.36	1129.4	1168.76	1190.74	956.694	993.121	1109.97	1120.56	1089.89	1188.19	1182.8	1335.84	1053.21	1105.1	1169.13	1120.79	1158.18	1251.8	302911	335904	333674	346686	333025	311289	342208	354135	360795	289878	300916	336321	339528	330237	360021	358388	404760	319122	334844	354246	339601
xylf	b3566	[g]	35.734	330		126.473				84.8671	207.509				191.785														41736.2				28006.1	68478				63289
avta	b3572		46.711	417		85.1286	86.4647	83.6167	86.7308	84.5104	92.9264	78.8761	74.7817	85.5802	74.8478		80.4824							74.3223	84.8379	80.805	79.236	86.4996	35498.6	36055.8	34868.2	36166.7	35240.8	38750.3	32891.3	31184	35686.9	31211.5		33561.2							30992.4	35377.4	33695.7
aldb	b3588		56.306	512		1239.2	733.257			1140.57	980.268				1178.27	632.546	673.881						845.594	656.06					634469	375427			583973	501897				603275	323864	345027						432944	335903
selb	b3590	[j]	68.867	614		68.7214	74.5579	61.7222	68.0509	72.1698	63.5043	66.7041	70.9854	53.7372	62.0509		64.7881		73.2977	59.2346	64.6922			64.5549	65.8637	64.3528	56.8853	62.1813	42194.9	45778.5	37897.4	41783.2	44312.2	38991.7	40956.3	43585	32994.7	38099.3		39779.9		45004.8	36370.1	39721			39636.7	40440.3	39512.6
sela	b3591	[e]	50.607	463		31.3354	33.9619				31.817				30.9014											41.9117			14508.3	15724.4				14731.3				14307.3											19405.1
yibf	b3592	[o]	22.545	202		330.214	304.885	268.311	224.774	373.008	301.977	255.171	209.194	189.984	345.937	273.197	257.928		169.83					278.917	256.96	160.312	133.899	120.917	66703.1	61586.8	54198.8	45404.3	75347.7	60999.4	51544.6	42257.1	38376.7	69879.2	55185.7	52101.4		34305.7					56341.1	51905.8	32383.1
mtla	b3599	[g]	67.971	637		865.924	706.117	505.837	369.979	874.41	785.622	653.08	458.59	374.798	717.035	720.235	648.596	599.875	485.108	366.912	318.76	218.371	658.771	583.32	492.539	418.705	324.674	249.489	551593	449796	322218	235677	556999	500441	416012	292122	238746	456751	458790	413155	382120	309013	233723	203050	139103	419637	371575	313747	266715
mtld	b3600	[g]	41.139	382		518.512	394.564	301.343	233.631	546.275	441.512	364.606	282.4	257.527	546.14	550.297	389.069	402.017	278.15	217.69	198.573	167.527	658.642	390.902	319.738	261.25	220.107	167.451	198072	150723	115113	89247.2	208677	168658	139279	107877	98375.3	208626	210213	148624	153571	106253	83157.6	75854.8	63995.4	251601	149324	122140	99797.5
yibl	b3602		13.696	120		415.937	438.267	510.905	512.629	427.316	462.877	468.309	471.561	511.656	363.034	352.783	414.454	406.965	427.635	453.722	457.501			393.384	457.746	459.33	446.779	440.874	49912.4	52592	61308.6	61515.5	51278	55545.2	56197.1	56587.4	61398.7	43564.1	42333.9	49734.4	48835.8	51316.3	54446.7	54900.1			47206	54929.5	55119.6
lldd	b3605	[c]	42.728	396		146.282	129.799	106.85	86.176	166.882	147.83	112.711		68.5438	121.564		138.886	112.829	91.584	81.9195				100.829	95.6187	86.0191	78.2363	69.3227	57927.6	51400.6	42312.7	34125.7	66085.2	58540.5	44633.6		27143.4	48139.3		54998.7	44680.4	36267.3	32440.1				39928.3	37865	34063.5
cyse	b3607	[e]	29.316	273		284.895	245.557	233.097	199.941	332.977	261.686	260.195	210.774	186.312	317.387	314.185	198.282	239.952	204.449	186.334		169.518		223.049	236.152	185.369	164.371	161.025	77776.4	67037.2	63635.4	54583.9	90902.8	71440.2	71033.3	57541.2	50863.1	86646.6	85772.6	54131.1	65506.9	55814.5	50869.2		46278.3		60892.3	64469.5	50605.8
gpsa	b3608	[c]	36.361	339		417.233	355.502	344.079	302.43	431.756		373.424	333.372	277.858	525.85	433.273	386.912	375.013	270.215		313.3	277.524	449.21	372.464	376.178	339.574	290.95	322.638	141442	120515	116643	102524	146365		126591	113013	94193.9	178263	146880	131163	127129	91602.7		106209	94080.8	152282	126265	127524	115116
secb	b3609	[u]	17.277	155		4841.85	4884.45	5359.46	4499.33	5170.16	5014.13	5098.14	4997.02	4770.11	5337.09	5280.64	6068.57	5976.06	5598.93	5580.23	5061.88	5205.55	5462.5	5878.14	5912.12	5623.99	5232.37	5225.8	750487	757089	830717	697397	801374	777190	790211	774538	739368	827249	818500	940628	926289	867834	864935	784592	806861	846687	911112	916378	871719
grxc	b3610	[o]	9.1374	83		3340.55	2598.76	2227.4	1932.28	3199.57	3249.57	3138.33	2063.31	1577.01	3791.74	4583.48	3751.44	2769.4	2318.55	1679.26	1081.36	729.237	3895.88	2952.79	2598.12	2378.99	1294.48	1495.04	277266	215697	184874	160380	265564	269714	260482	171255	130892	314715	380429	311370	229860	192440	139379	89753.3	60526.7	323358	245082	215644	197456
yibn	b3611	[p]	15.596	143		2045.99	2312.31	2461.25	2307.35	2121.47	2164.5	2470.55	2564.31	2477.11	2321.76	2358.07	2598.18	2664.13	2651.56	2812.96	2722.71	2556.74	2369.61	2500.15	2595.65	2721.04	2502.26	2661.25	292577	330661	351958	329951	303370	309523	353288	366697	354226	332012	337204	371539	380971	379173	402253	389348	365613	338854	357521	371178	389108
gpmm	b3612		56.193	514		329.645	455.617	642.538	738.034	372.064	409.928	562.409	762.467	853.6	307.298	264.032	292.532	380.294	462.474	557.846	584.325	587.516	301.837	351.761	415.153	486.642	602.03	609.571	169437	234187	330264	379350	191241	210703	289078	391908	438750	157951	135713	150362	195471	237712	286733	300343	301983	155144	180805	213389	250134
envc	b3613		46.594	419		34.2476	49.5244	39.0893	35.7124	41.3677					39.4921									30.5814		35.1066	26.1826	33.2209	14349.8	20750.7	16378.4	14963.5	17333.1					16547.2									12813.6		14709.7
tdh	b3616	[er]	37.239	341			95.2789			159.015	118.253		78.5929		195.282	243.611	177.827		133.345					146.215						32490.1			54224	40324.3		26800.2		66591.3	83071.3	60639		45470.7					49859.3
kbl	b3617	[h]	43.117	398		52.2118	37.7201	39.7188	31.6689			38.9554			81.7694									76.3773	69.4082	54.1252	52.9064	60.5415	20780.3	15012.6	15808.1	12604.2			15504.3			32544.2									30398.2	27624.5	21541.8
rfad	b3619	[mg]	34.893	310		1981.63	1941.06	1898.68	1989.2	1983.45	1928.8	1757.59	1882.68	1936.54	2159.4	2150.02	2052.42	2122.54	1932.31	2023.37	2044.15	2194.33	2313.99	1916.76	2001.81	2039.11	2053.19	2127.02	614306	601729	588591	616652	614870	597926	544853	583629	600327	669415	666505	636250	657986	599015	627246	633686	680242	717338	594197	620561	632123
rfaf	b3620	[m]	39.042	348
waau	b3623		41.729	357																							21.3358
rpmg	b3636	[j]	6.3715	55		5830.82	7184.21	7635.73	8955.79	5698.55	6409.98	7800.51	7863.71	8468.87	5754.62	6893	8285.21	9077.97	10933.6	11813	11540.8	11037.2	5964.39	9273.97	10160.1	11607.9	11424.6	12091	320695	395131	419965	492568	313420	352549	429028	432504	465788	316504	379115	455686	499288	601349	649717	634741	607046	328042	510068	558808	638433
rpmb	b3637	[j]	9.0064	78		11882.1	15311.2	16932.9	20005	11896.9	13337.4	16177	18908.4	19561.1	11905.9	13097.9	15457.4	19320.6	21617	23929.2	24724.2	24210.6	12518.7	17561.9	21534.2	22530.6	23788.8	23876.1	926800	1.19428e+06	1.32076e+06	1.56039e+06	927960	1.04032e+06	1.2618e+06	1.47485e+06	1.52577e+06	928662	1.02164e+06	1.20568e+06	1.507e+06	1.68613e+06	1.86647e+06	1.92849e+06	1.88842e+06	976458	1.36982e+06	1.67967e+06	1.75739e+06
dfp	b3639		43.438	406		144.2	127.588	116.284	102.029	142.294	102.5	118.843	111.232	113.648	158.753	128.205	165.949	54.554	119.823	129.548		94.9971		129.038	137.616	110.742	116.324	108.398	58545.2	51800.5	47211.4	41423.7	57771.3	41614.9	48250.3	45160.2	46140.9	64453.6	52051.4	67375.4	22148.9	48648.3	52596.6		38568.8		52389.4	55871.9	44961.4
dut	b3640	[f]	16.155	151					263.613					261.598		246.476		276.118		355.563	359.108	277.3		323.995		324.98	590.05					39805.5					39501.4		37217.8		41693.8		53690	54225.2	41872.3		48923.3		49072
yicc	b3644	[s]	33.175	287		562.427	528.703	462.375	492.553	552.073	556.612	472.463	454.263	448.658	629.326	537.498	550.188	487.178	500.667	402.359	425.895	461.904	741.223	537.471	505.718	485.001	430.357	462.973	161417	151738	132702	141363	158445	159748	135597	130374	128765	180617	154262	157904	139820	143691	115477	122232	132567	212731	154254	145141	139195
gmk	b3648	[f]	23.592	207		167.256	119.81	143.362	164.228	132.951	134.827	133.613	156.133	163.408	107.287	101.272	107.079	106.702	159.883	113.281	118.631			135.474	116.533	110.197	127.514	138.716	34622	24800.6	29675.8	33995.3	27521	27909.2	27657.8	32319.6	33825.4	22208.4	20963.3	22165.3	22087.2	33095.7	23449.1	24556.6			28043.1	24122.3	22810.8
rpoz	b3649	[k]	10.236	91		3463.34	3389.61	3493.16	3351.27	3405.73	3153.2	3452.67	3502.47	3726.96	3355.18	3174.38	3708.55	3616.35	3391.88	3773.65	3675.71	3790.12	3644.2	3692.77	3791.14	3907.95	3563.61	3918.65	315164	308454	317878	304965	309921	286941	314193	318725	339153	305321	288868	337478	329088	308661	343402	334489	344901	331622	336042	344994	355624
spot	b3650	[tk]	79.342	702																				130.996			198.772																				91959.2
yich	b3655		62.272	569		20.212			17.4494	23.5566		18.4387	18.6825	17.142	17.1962	14.5363											8.38037		11500.6			9928.72	13403.7		10491.6	10630.3	9753.77	9784.64	8271.13
nlpa	b3661	[p]	29.423	272		1081.66	1427.53	1741.99	1930.33	1182.58	1195.62	1623.93	1814.12	1926.49	596.343	625.79	691.664	800.149	662.951	691.197	615.503	532.517	665.968	750.844	796.399	727.554	612.7	598.152	294211	388287	473822	525049	321663	325208	441710	493439	524005	162205	170215	188133	217640	180323	188006	167417	144845	181143	204230	216621	197895
ilvn	b3670	[e]	11.106	96		2093.59	2237.72	2301.04	2314.45	2180.36	2191.62	2110.89	2308.77	2113.66	998.345	1095.09	1453.12	1454.77	1389.04	1437.65	1126.9	754.425	1064.93	1707.44	1949.76	1677.86	1333.95	1290.64	200985	214821	220900	222187	209315	210396	202646	221642	202911	95841.1	105128	139500	139658	133348	138014	108182	72424.8	102233	163915	187177	161075
ilvb	b3671	[eh]	60.44	562		2470.02	2816.8	3040.85	3144.35	2433.39	2758.94	2898.99	3052.5	3199.94	1065.11	1215.23	1803.01	2156.19	2237.93	2054.11	1830.27	1387.58	1156.77	2227.91	2722.84	2507.28	1946.84	1867.78	1.38815e+06	1.58304e+06	1.70896e+06	1.76713e+06	1.36756e+06	1.55052e+06	1.62923e+06	1.71551e+06	1.79837e+06	598594	682961	1.01329e+06	1.21178e+06	1.25772e+06	1.15441e+06	1.02861e+06	779820	650104	1.25209e+06	1.53024e+06	1.40909e+06
ibpa	b3687	[o]	15.774	137					218.462				278.083		174.897									231.052	254.652		268.915	265.482				29929.3				38097.4		23960.9									31654.1	34887.3
yida	b3697	[r]	29.721	270		158.394	139.888	212.609	171.802	133.397	129.068	133.362	168.847	171.855	100.815		153.245	139.072	168.254		178.66	189.783		144.45	165.747	149.353	157.713	175.514	42766.4	37769.8	57404.6	46386.7	36017.3	34848.3	36007.9	45588.8	46400.9	27220.1		41376	37549.4	45428.7		48238.2	51241.3		39001.4	44751.6	40325.2
yidb	b3698		13.786	132		263.093	177.485	180.176	360.612	234.312		172.368	168.468	128.346	264.704						105.878			169.179		117.183	117.186	102.825	34728.3	23428	23783.2	47600.8	30929.2		22752.5	22237.8	16941.6	34941						13975.9			22331.6		15468.1
gyrb	b3699		89.949	804		627.581	667.72	709.531	762.015	616.304	654.119	657.807	756.912	749.804	556.677	570.115	641.456	673.6	741.217	791.156	731.923	839.711	613.415	656.39	748.887	746.743	729.468	815.684	504575	536847	570463	612660	495509	525912	528877	608557	602842	447569	458372	515731	541574	595939	636089	588466	675128	493186	527737	602105	600381
dnan	b3701	[l]	40.586	366		222.266	219.589	212.942	183.345	222.867	231.031	221.317	212.969	204.978	215.197	191.734	237.349	216.731		246.648		252.779	260.004	187.737	243.61	181.297	173.613	173.857	81349.3	80369.5	77936.9	67104.1	81569.3	84557.2	81001.9	77946.8	75021.9	78761.9	70174.7	86869.9	79323.5		90273		92517.1	95161.5	68711.8	89161.3	66354.7
dnaa	b3702	[l]	52.55	467					31.6929	45.6284					44.0151	43.9184	50.4742				41.7969			46.4717			34.4625	37.3368				14800.6	21308.4					20555.1	20509.9	23571.5				19519.1			21702.3
rpmh	b3703	[j]	5.3803	46		4725.99	5576.18	6433.96	7765.12	5038.92	5759.02	6801.31	7579.24	7628.81	4859.48	5468.11	6869.59	8127.11	8519.78	10506	10237.8	12338.1	5051.94	7602.8	9059.03	10017.5	9550.1	10165.5	217396	256504	295962	357195	231791	264915	312860	348645	350925	223536	251533	316001	373847	391910	483277	470938	567552	232389	349729	416715	460807
rnpa	b3704	[j]	13.789	119						225.612						315.643	272.691	234.698		289.508		258.491		253.955	233.614	246.012	270.965						26847.8						37561.5	32450.2	27929.1		34451.4		30760.5		30220.7	27800	29275.4
yidc	b3705	[u]	61.525	548		504.413	566.863	595.445	594.067	546.915	602.989	641.629	701.202	616.293	598.429	640.357	749.285	783.489	784.426	800.665	863.875	818.837	606.201	750.403	770.748	797.535	782.45	824.005	276418	310641	326304	325549	299709	330438	351613	384259	337729	327939	350916	410608	429352	429865	438764	473403	448723	332198	411221	422370	437049
mnme	b3706		49.23	454			37.8034			49.1689		36.6323	39.0998		50.1452		32.1084							40.9289	35.9426	33.5761	36.2547			17162.8			22322.7		16631.1	17751.3		22765.9		14577.2							18581.7	16318	15243.6
tnaa	b3708		52.773	471		4590.67	6490.15	5291.4	6182.79	5456.35	9537.37	5057.54	2293.62		6819.38	6260.42	7071.71	4312.06	4232.55	4017.22	4941.07	2634.81	4293.46	6365.51	6979.87	8664	2840.55	4708.27	2.1622e+06	3.05686e+06	2.49225e+06	2.91209e+06	2.56994e+06	4.4921e+06	2.3821e+06	1.08029e+06		3.21193e+06	2.94866e+06	3.33078e+06	2.03098e+06	1.99353e+06	1.89211e+06	2.32724e+06	1.241e+06	2.02222e+06	2.99816e+06	3.28752e+06	4.08075e+06
tnab	b3709	[e]	45.21	415
yief	b3713	[r]	20.375	188		416.21	335.29	268.007	253.387	419.074	389.67	282.356	232.647	236.283	493.812	381.873	303.392	267.693	240.307	193.442		197.908	668.629	323.316	252.775	196.625	183.199	180.795	78247.5	63034.5	50385.3	47636.8	78785.8	73258	53082.9	43737.6	44421.3	92836.7	71792.1	57037.8	50326.3	45177.7	36367.1		37206.7	125702	60783.4	47521.7	36965.6
purp	b3714		46.865	445				101.334	304.496	196.544	107.467		107.731	141.594							158.723			87.7584	218.822	94.0091	231.204	67.9133			45093.4	135501	87461.9	47822.9		47940.3	63009.2							70631.7			39052.5	97375.8	41834.1
phou	b3724	[p]	27.417	241		68.9556	73.7047	79.8726	60.6836	71.6732	76.2887	89.5113	61.0888	73.6895	67.1272	76.3194								64.4133	63.7813	48.5667	42.7272	45.2413	16618.3	17762.8	19249.3	14624.7	17273.2	18385.6	21572.2	14722.4	17759.2	16177.7	18393								15523.6	15371.3	11704.6
pstb	b3725	[p]	29.027	257		85.2545	101.684	91.4854	86.386	94.2763	94.8651	82.2072	79.7132	87.5556	71.4846				104.349		77.2945	87.5048		87.8759	89.2615	96.3576	100.368	89.7869	21910.4	26132.8	23511.7	22201.2	24229	24380.3	21127.3	20486.3	22501.8	18371.5				26817.8		19864.7	22488.7		22584.1	22940.2	24763.9
psts	b3728	[p]	37.023	346		433.096	445.499	391.928	311.43	421.081	454.49	447.218	343.425	318.088	547.624	374.086	377.922	317.128	349.332	375.393	260.42		360.56	387.483	366.942	339.665	448.989	263.544	149851	154143	135607	107755	145694	157254	154738	118825	110058	189478	129434	130761	109726	120869	129886	90105.5		124754	134069	126962	117524
glms	b3729	[m]	66.894	609		1096.33	1162.41	1146.38	1161.95	1124.2	1172.85	1147.07	1206.79	1263.05	1057.96	1126.54	1203.35	1302.85	1418.2	1363.74	1331.33	1585.01	1140.02	1162.87	1292.12	1277.13	1357.15	1403.98	667664	707906	698147	707629	684639	714268	698565	734936	769199	644298	686065	732840	793433	863683	830519	810782	965272	694271	708189	786900	777775
glmu	b3730	[m]	49.19	456		113.353	127.852	135.355	164.179	111.145	147.614	149.135	167.849	176.977	110.367	113.929	127.953	156.756	152.758	154.445	190.181	209.077	130.609	127.072	155.363	168.083	174.089	196.13	51688.9	58300.3	61721.8	74865.5	50682.1	67312.1	68005.5	76539.1	80701.6	50327.3	51951.4	58346.6	71480.7	69657.8	70427	86722.7	95339.3	59557.7	57944.7	70845.7	76646
atpc	b3731	[c]	15.068	139		2130.72	2394.23	2385.64	2174.94	2217.56	2221.73	2351.41	2377.39	2152.13	2450.21	2642.91	3062.66	3167.48	2724.96	3143.76	3007.75	2648.81	2521.11	3125.69	3225.29	3157.71	2954.31	3028.33	296170	332798	331604	302317	308241	308820	326846	330458	299147	340579	367364	425710	440280	378769	436983	418077	368184	350434	434471	448315	438922
atpd	b3732	[c]	50.325	460		17910.6	19686.6	19278.7	18291.6	17781.8	18609.8	19444.5	19223.3	18657.2	19216.2	20848.9	24480.8	26450.7	25048.8	25385.2	24530.5	21094.9	21116.4	25397.3	26891.7	25702.5	24122.9	24268.7	8.23886e+06	9.05585e+06	8.86819e+06	8.41413e+06	8.17961e+06	8.56053e+06	8.94447e+06	8.84274e+06	8.58233e+06	8.83944e+06	9.59049e+06	1.12612e+07	1.21673e+07	1.15224e+07	1.16772e+07	1.1284e+07	9.70366e+06	9.71352e+06	1.16828e+07	1.23702e+07	1.18231e+07
atpg	b3733	[c]	31.577	287		5146.24	5928.26	5608.89	5350.07	5430.91	5527.98	5903.15	5574.36	5344.87	5590.12	6263.45	7342.79	7671.99	7155.65	7254.66	7336.88	6090.04	6096.78	7343.87	7780.83	7596.18	7016.84	7121.58	1.47697e+06	1.70141e+06	1.60975e+06	1.53547e+06	1.55867e+06	1.58653e+06	1.6942e+06	1.59984e+06	1.53398e+06	1.60436e+06	1.79761e+06	2.10738e+06	2.20186e+06	2.05367e+06	2.08209e+06	2.10568e+06	1.74784e+06	1.74978e+06	2.10769e+06	2.2331e+06	2.1801e+06
atpa	b3734	[c]	55.221	513		17622.2	19124.6	18366.9	17385.5	17844.7	18235.8	19160	18634.1	17881.4	18524.4	21227.9	23810.4	24934.7	24089.5	22975.1	22589.8	19008.1	20611.8	24473.7	25309	23776	22010	21343.3	9.04018e+06	9.81093e+06	9.42223e+06	8.91878e+06	9.15433e+06	9.35498e+06	9.82909e+06	9.5593e+06	9.17318e+06	9.50301e+06	1.08899e+07	1.22148e+07	1.27915e+07	1.23579e+07	1.17862e+07	1.15886e+07	9.75114e+06	1.05739e+07	1.2555e+07	1.29835e+07	1.21971e+07
atph	b3735	[c]	19.332	177		4302.86	4704.95	4208.93	3966.28	4222.88	4326.95	4507.74	4477.36	4251.79	4464.21	5150.95	6004.44	6425.1	5847.57	5886.13	5940.33	4727.48	5022.34	5807.93	5924.67	6038.31	5401.46	5097.06	761606	832776	744981	702031	747450	765871	797871	792493	752568	790166	911718	1.06279e+06	1.13724e+06	1.03502e+06	1.04184e+06	1.05144e+06	836763	888955	1.028e+06	1.04867e+06	1.06878e+06
atpf	b3736	[c]	17.264	156		7689.55	8442.43	8536.62	7978.1	7785.46	8003.12	8596.05	8455.99	7736.01	8285.22	9073.49	10538.4	11283.7	10191.4	11131.3	10237	9624.38	8855.86	10966.8	11367.1	11228.9	10397.2	10208.1	1.19957e+06	1.31702e+06	1.33171e+06	1.24458e+06	1.21453e+06	1.24849e+06	1.34098e+06	1.31913e+06	1.20682e+06	1.29249e+06	1.41546e+06	1.64398e+06	1.76026e+06	1.58986e+06	1.73649e+06	1.59697e+06	1.5014e+06	1.38151e+06	1.71083e+06	1.77326e+06	1.75171e+06
atpe	b3737	[c]	8.256	79		4529.59	4982.77	3717.59	4589.2	4634.07	5033.44	5128.76	5247.2	4209.72	4254.37	5085.76	6842.83	6117.22	6429.49	5653.54	6083.63	5274.04	4097.19	5817.42	6132.84	6052.27	5848.19	4711.83	357838	393639	293689	362547	366092	397642	405172	414528	332568	336095	401775	540583	483261	507930	446630	480607	416649	323678	459576	484494	478129
atpb	b3738	[c]	30.303	271		592.613	676.648	619.42	623.31	570.926	539.853	656.87	653.782	585.861	647.726	759.83	892.829	941.719	899.048	906.56	933.851	773.274	738.668	844.405	898.503	831.082	875.775	806.68	160598	183372	167863	168917	154721	146300	178012	177175	158768	175534	205914	241957	255206	243642	245678	253074	209557	200179	228834	243494	225223
rsmg	b3740		23.431	207		128.09	144.246	114.071	119.729	100.041			135.695	139.064	106.965						117.057			155.467	146.878	155.82	160.168	155.344	26514.6	29859	23612.7	24783.8	20708.5			28088.8	28786.2	22141.7						24230.9			32181.6	30403.7	32254.8
mnmg	b3741		69.52	629			36.3859	36.5975	39.9721		58.1005	38.388	31.373	37.2551	22.8566	37.551								46.2555	54.0508		57.2375	52.1115		22886.7	23019.8	25142.5		36545.2	24146.1	19733.6	23433.4	14376.8	23619.5								29094.7	33998
mioc	b3742	[c]	15.807	147
asna	b3744	[e]	36.65	330		234.238	319.463	437.426	530.062	233.284	296.057	377.395	452.181	506.081	109.14	142.341	218.136	286.53	387.125	470.262	501.334	595.601		248.143	355.856	437.363	473.123	518.546	77298.5	105423	144351	174920	76983.6	97698.9	124540	149220	167007	36016	46972.4	71984.9	94555.1	127751	155186	165440	196548		81887.1	117432	144330
rbsd	b3748	[g]	15.292	139					433.828	1418.25	999.084		543.484	313.037	1612.96									803.358								60302.1	197137	138873		75544.3	43512.1	224202									111667
rbsb	b3751	[g]	30.95	296		15085.3	11436.1	5712.6	3175.32	13149.9	12934.7	7549.72	4109.95	3004.68	17844.8	12124.1	11429.7	10380.2	9276.54	7741.57	4844.63	444.273	13685	15900.3	12065.1	8922.67	9395.78	3162.14	4.46524e+06	3.38509e+06	1.69093e+06	939895	3.89236e+06	3.82866e+06	2.23472e+06	1.21655e+06	889385	5.28205e+06	3.58874e+06	3.38318e+06	3.07254e+06	2.74586e+06	2.2915e+06	1.43401e+06	131505	4.05077e+06	4.70648e+06	3.57126e+06	2.64111e+06
rbsk	b3752	[g]	32.29	309		77.9147	93.5303	80.1071	38.4805			44.8373				62.7135		114.463					55.2355	98.5489		90.4814	83.1582	67.086	24075.6	28900.9	24753.1	11890.5			13854.7				19378.5		35369.2					17067.8	30451.6		27958.8
yiep	b3755		26.076	230		64.8816		67.3785	103.488	63.2764	72.1578	65.1825	93.4924	130.715	61.256					89.2808	131.015			83.199	105.049	105.008	99.1491	122.012	14922.8		15497.1	23802.2	14553.6	16596.3	14992	21503.3	30064.4	14088.9					20534.6	30133.4			19135.8	24161.2	24151.8
yife	b3764	[s]	13.133	112		4970.27	5072.68	5154.73	4825.54	5070.05	5461.12	5228.36	4866.52	4585.92	4955.92	4687.34	5527.28	5601.53	5650.45	5501.53	5079.32	2607.52	4978.04	5467.02	5330.7	5941.18	5865.83	5553.78	556670	568141	577330	540460	567846	611645	585577	545050	513623	555063	524982	619055	627371	632850	616172	568883	292043	557541	612307	597039	665412
ilve	b3770		34.093	309		1126.3	1412.72	1607.69	2215.28	1237.38	1172.02	1586.55	1775.98	2121.67	717.569	784.675	1015.03	1232.62	1305.26	1619.07	1640.9	1525.86	633.722	1065.17	1450.44	1536.98	1643.19	1608.01	348026	436531	496778	684521	382351	362154	490245	548777	655596	221729	242464	313643	380879	403324	500292	507038	471491	195820	329137	448185	474925
ilvd	b3771		65.531	616		222.496	246.765	287.505	344.33	223.838	248.76	271.014	307.831	345.121	126.417	159.272	174.117	200.881	216.846	215.696	250.679	229.547	135.75	188.199	200.813	230.127	230.951	257.31	137058	152007	177103	212107	137884	153236	166945	189624	212595	77872.9	98111.6	107256	123742	133577	132869	154418	141401	83622	115931	123701	141758
ilva	b3772	[e]	56.195	514		88.337	99.0504	109.351	125.817	75.0223	75.7889	91.7809	119.615	136.844	44.7285						98.6481	79.4641		74.054	70.3534	73.688	79.3104	80.7876	45405.2	50911.9	56206.4	64670.1	38561.5	38955.5	47175.4	61482.4	70337.8	22990.5						50705.1	40844.6		38063.7	36161.7	37875.6
ilvc	b3774	[eh]	54.068	491		23374.4	24385.2	24144.4	24399.9	23204.8	23853.5	24092.9	24431.7	23839.6	4273.36	4668.64	5803.9	6167.61	5771.57	4872.43	3905.62	2547.23	4699.01	5986.58	6226.45	5132.52	4109.79	3267.5	1.14768e+07	1.19731e+07	1.18549e+07	1.19804e+07	1.13936e+07	1.17121e+07	1.18296e+07	1.1996e+07	1.17053e+07	2.09822e+06	2.2923e+06	2.84972e+06	3.0283e+06	2.83384e+06	2.39236e+06	1.91766e+06	1.25069e+06	2.30722e+06	2.93941e+06	3.05719e+06	2.52007e+06
ppic	b3775	[o]	10.232	93		993.053	951.233	900.931	940.491	961.316	1281	1087.94	841.13	767.13	920.55	1056.87	1238.42	1136.77	1143.48	1047.05	832.796	596.892	955.314	977.074	1153.28	1238.18	953.053	1009.52	92353.9	88464.7	83786.6	87465.6	89402.4	119133	101178	78225.1	71343.1	85611.2	98289.3	115173	105720	106344	97375.3	77450	55510.9	88844.2	90867.9	107255	115151
rhlb	b3780	[lkj]	47.125	421		330.246	354.624	364.886	387.896	337.415	340.337	338.243	373.65	391.229	308.728	298.833	318.803	333.432	352.83	324.439	350.565	355.688	303.672	305.405	355.152	324	337.435	328.873	139034	149297	153617	163304	142052	143282	142400	157307	164707	129974	125809	134216	140375	148542	136589	147588	149745	127846	128576	149519	136404
trxa	b3781	[oc]	11.806	109		12689.1	11416.9	10150.3	8506.7	12617	12221.5	11610.4	9053.28	8125.42	11418	13061.8	11102.7	9900.83	8920.21	7317.14	5769.17	3439.08	11182.8	10222.3	8743.91	8338.47	6942.59	6624.67	1.38311e+06	1.24444e+06	1.10638e+06	927231	1.37526e+06	1.33214e+06	1.26554e+06	986808	885671	1.24456e+06	1.42374e+06	1.2102e+06	1.07919e+06	972303	797568	628839	374860	1.21892e+06	1.11423e+06	953086	908894
rho	b3783	[k]	47.004	419		3020.69	3295.84	3514.38	3682.18	3094.83	3255.39	3378.22	3569.51	3575.85	2952.34	3363.35	3422.97	3842.18	3929.07	4049.81	4188.09	4295.06	3149.62	3570.85	3882.12	3841.4	4024.37	4105.49	1.26567e+06	1.38096e+06	1.47253e+06	1.54284e+06	1.29673e+06	1.36401e+06	1.41548e+06	1.49562e+06	1.49828e+06	1.23703e+06	1.40925e+06	1.43422e+06	1.60987e+06	1.64628e+06	1.69687e+06	1.75481e+06	1.79963e+06	1.31969e+06	1.49619e+06	1.62661e+06	1.60955e+06
wzze	b3785	[m]	39.489	348		141.923	144.281	162.369	144.756	130.295	148.305	129.668	118.874	141.448	120.251		128.828	131.512	139.887	149.464	114.164	145.977	123.575	143.582	137.278	143.352	143.187	148.803	49389.3	50209.8	56504.5	50375.1	45342.6	51610	45124.5	41368.3	49224	41847.5		44832	45766.3	48680.7	52013.3	39729	50800	43003.9	49966.5	47772.8	49886.4
rffe	b3786		42.244	376
rffa	b3791	[m]	41.901	376		31.3437	35.6717	30.0116			42.4191	23.8792		31.9473								36.2369				34.1344	35.453	39.3556	11785.2	13412.6	11284.4			15949.6	8978.59		12012.2								13625.1				12834.5
hemy	b3802	[h]	45.244	398		652.203	578.531	538.668	426.111	650.573	573.3	434.836	457.603	429.211	698.825	670.728	603.654	524.737	518.02	452.236	400.291	403.568	768.258	587.962	549.428	492.859	397.58	361.19	259577	230255	214390	169592	258928	228173	173065	182126	170826	278133	266950	240254	208845	206172	179990	159316	160620	305767	234009	218672	196158
hemx	b3803	[h]	42.962	393		390.437	376.988	336.908	298.506	412.788	375.081	348.713	321.629	329.013	451.864	445.109	405.815	381.573	346.562	271.756	270.411	266.291	468.511	389.742	330.906	271.61	228.381	232.635	153442	148156	132405	117313	162226	147407	137044	126400	129302	177583	174928	159485	149958	136199	106800	106272	104652	184125	153169	130046	106743
cyay	b3807	[p]	12.231	106
dapf	b3809	[e]	30.208	274
yigb	b3812	[r]	27.122	238										63.4838										60.5553	38.8618												15109.1										14412.2	9249.1
uvrd	b3813	[l]	81.989	720			15.0645		16.0581						17.9517									16.6686		22.5476				10846.4		11561.8						12925.2									12001.4		16234.3
cora	b3816	[p]	36.589	316		137.075	134.675	113.224	110.287	171.78	166.662	122.021	103.932	111.752	239.275		192.522					136.29	249.013	165.6	159.256	128.817	107.344	121.22	43315.7	42557.3	35778.7	34850.8	54282.5	52665.2	38558.6	32842.7	35313.6	75611		60836.9					43067.6	78688.1	52329.7	50324.9	40706.3
yigi	b3820		17.163	155		307.405	305.703	301.793	240.363	319.895	147.201	189.784	282.812	254.818	281.793						235.499			316.001	278.171	265.333	267.396	236.758	47647.8	47384	46778	37256.2	49583.7	22816.2	29416.5	43835.8	39496.8	43678						36502.3			48980.2	43116.5	41126.7
plda	b3821	[m]	33.163	289			49.3796																			58.9793				14270.7																			17045
yigl	b3826		29.707	266		202.308	161.452	134.781		115.381		119.038	124.132											101.741	127.015		136.006		53814.1	42946.3	35851.6		30691.4		31664.1	33019											27063.2	33786.1
mete	b3829	[e]	84.672	753		14002.8	22435.2	32791.4	37223.3	13432.9	17328.1	26959.9	36650.8	38367.8	6596.53	8182.47	11318.4	15523	18265.8	19720.6	20506.7	18867.3	7218.79	14014.2	17500.1	19088.1	20601.5	20106	1.05441e+07	1.68937e+07	2.46919e+07	2.80291e+07	1.01149e+07	1.30481e+07	2.03008e+07	2.7598e+07	2.88909e+07	4.96719e+06	6.1614e+06	8.52279e+06	1.16888e+07	1.37542e+07	1.48496e+07	1.54415e+07	1.42071e+07	5.43575e+06	1.05527e+07	1.31776e+07	1.43733e+07
ysga	b3830		29.425	271			483.862	449.308		549.692	477.612	402.755	350.437	253.646	493.979	439.455	431.31	310.896				69.0617	493.118	371.425	268.782	179.004	177.174	131.156		131127	121763		148967	129433	109146	94968.5	68738.2	133868	119092	116885	84252.7				18715.7	133635	100656	72839.9	48510.2
udp	b3831	[f]	27.159	253		4476.69	3090.78	2330.66	1782.67	4358.69	3432.73	2755.18	1900.24	1548.18	6679.63	5423.02	4353.05	2956.46	1949.82	1301.74	1197.53	1041.34	6363.53	3628.01	2582.1	1803.76	1156.86	1115.39	1.1326e+06	781968	589657	451016	1.10275e+06	868480	697059	480762	391690	1.68995e+06	1.37202e+06	1.10132e+06	747984	493305	329341	302976	263458	1.60997e+06	917885	653271	456352
ubie	b3833		28.073	251		820.971	846.744	854.142	868.063	826.6	772.227	918.785	852.476	809.065	808.805	779.222	874.721	882.902	780.642	800.531	1014.61	802.194	738.677	825.681	882.689	844.053	841.243	874.965	206064	212533	214390	217884	207477	193829	230615	213971	203075	203010	195585	219555	221608	195941	200933	254666	201351	185408	207246	221555	211857
tata	b3836		9.6639	89		510.051	531.407	517.41	489.356	531.047	536.934	557.57	546.573	505.239	536.627	574.83	549.257	593.129	503.254	499.893	510.898	454.039	560.737	529.932		455.083	457.263	453.307	45394.5	47295.2	46049.5	43552.7	47263.2	47787.1	49623.8	48645	44966.3	47759.8	51159.8	48883.9	52788.5	44789.6	44490.5	45470	40409.5	49905.5	47163.9		40502.4
tatb	b3838		18.421	171			102.279			63.0173					111.379									94.006			95.1274			17489.8			10776					19045.7									16075
ubid	b3843	[h]	55.603	497		147.238	138.691	124.653		139.901	135.352	134.831	104.543	117.706	123.865	144.938	130.141	115.524	132.031	99.5193			116.212	133.094		111.71	98.81	103.472	73177.3	68929.5	61952.6		69530.7	67269.9	67011.2	51958	58500	61561	72034.2	64680	57415.6	65619.2	49461.1			57757.2	66148		55519.8
fre	b3844	[hc]	26.242	233		247.629	250.217	250.775	195.915	237.957	252.56	248.886	221.686	209.627	244.695	271.397		315.414	251.472				259.953	266.938	248.453	226.596	229.591	205.62	57697.6	58300.5	58430.5	45648.3	55444	58846.4	57990.5	51652.9	48843.1	57013.9	63235.5		73491.4	58592.9				60569	62196.5	57889.6	52796.9
fada	b3845		40.876	387		2069.01	4321	936.975	1379.88	2821.85	1457.34	433.432			1155.01	865.604	2417.24	2564.17	248.634				1753.74	1886.74	2106.95	1329.09			800707	1.67223e+06	362609	534013	1.09205e+06	563991	167738			446989	334989	935471	992334	96221.4				678696	730168	815391	514360
fadb	b3846	[i]	79.593	729		1585.34	1477.61	1215.37	953.626	1681.89	1416.61	1330.68	1132.56		1759.15	1440.68	1575.3	660.569	1049.18	144.742			1214.67	1569.33	927.802	893.891		33.2381	1.15571e+06	1.07718e+06	886006	695193	1.2261e+06	1.03271e+06	970065	825635		1.28242e+06	1.05025e+06	1.14839e+06	481555	764854	105517			885496	1.14404e+06	676368	651646
pepq	b3847	[e]	50.176	443		1138.52	1133.1	962.259	766.205	1086.47	1149.31	922.828	885.498	780.584	1054.34	1041.9	1051.93	1099.93	1071.14	927.165	892.758	660.174	1070.21	1072.55	1131.53	938.727	874.12	773.928	504364	501964	426281	339429	481304	509146	408813	392276	345799	467075	461561	466003	487267	474517	410734	395492	292457	474104	475139	501268	415856
hemg	b3850	[ch]	21.226	181		82.0533	128.105	112.775	126.008		201.644	158.14	137.124	120.789	144.57	115.008		146.834								122.204	106.122	140.323	14851.7	23187	20412.4	22807.4		36497.6	28623.4	24819.5	21862.9	26167.2	20816.4		26577								22118.9
yihd	b3858	[s]	10.273	89		1457.2	1408.57	1274.29	1286.55	1428.83	1465.09	1395.61	1267.43	1350.18	1214.09	1066.76	1068.99	1061.45	957.132	768.67	687.383	608.931	1120.37	949.494	824.54	813.091	803.649	774.844	129691	125362	113411	114503	127166	130393	124209	112801	120166	108054	94941.9	95139.7	94469	85184.8	68411.6	61177.1	54194.9	99713.2	84505	73384.1	72365.1
dsba	b3860	[oc]	23.104	208		1120.2	1141.99	809.94	947.958	930.286	1106.57	970.153	781.143	782.977	1381.54	1311.36	1071.55	1578.5	1167.93	1029.42	1041.82	277.486	1326.71	1373.97	1179.85	1129.42	1540.75	1019.1	233003	237535	168467	197175	193500	230166	201792	162478	162859	287361	272764	222883	328328	242929	214119	216698	57717.1	275957	285786	245408	234919
pola	b3863	[l]	103.12	928		264.813	248.404	225.203	199.334	252.787	240.382	234.786	213.379	196.331	267.741	248.6	239.417	223.697	249.348	187.799	182.539	192.927	336.09	238.045	207.161	198.255	168.696	185.395	245746	230519	208988	184982	234587	223075	217881	198016	182195	248464	230701	222179	207591	231395	174278	169396	179036	311892	220905	192245	183981
yiha	b3865	[r]	23.561	210		691.81	719.784	743.013	734.614	738.139	771.119	778.632	734.126	759.835	725.148	777.225	789.064	781.281	697.151	729.307	679.871	508.57	774.53	785.563	821.6	779.135	676.582	725.804	145280	151155	156033	154269	155009	161935	163513	154166	159565	152281	163217	165703	164069	146402	153154	142773	106800	162651	164968	172536	163618
yihi	b3866	[s]	19.059	169		264.933	310.122	315.249	312.188	281.655	279.425	297.604	314.384	336.423	301.451		304.34	359.153	362.724	413.471	379.976	266.328	296.868	334.3	377.633	402.94	413.488	350.333	44773.7	52410.6	53277.1	52759.8	47599.7	47222.8	50295.1	53130.9	56855.5	50945.3		51433.5	60696.8	61300.3	69876.6	64216	45009.4	50170.8	56496.6	63820	68096.9
hemn	b3867	[h]	52.728	457		35.7761	39.9776	39.3707					39.0901	37.3701										31.2757	37.2838	35.6587	30.0875	38.4686	16349.7	18269.8	17992.4					17864.2	17078.1										14293	17038.7	16296
glng	b3868	[t]	52.254	469		22.5209	25.6644	26.9802	32.729	23.4546	31.1062		29.1901		32.0349		33.6819				60.3245	59.952		29.3005	31.9034	42.9736	42.326	54.1685	10562.3	12036.6	12653.7	15349.9	11000.2	14588.8		13690.2		15024.4		15796.8				28292.2	28117.5		13742	14962.7	20154.6
glnl	b3869	[t]	38.556	349						28.1763		40.2385	60.4538	63.1513	17.3454												38.0365	28.683					9833.52		14043.2	21098.4	22039.8	6053.55
glna	b3870	[e]	51.903	469		4615.4	5269.41	6050.86	7312.51	4521.52	5008.74	5396.58	6959.5	7673.51	4205.23	4800.81	6165.79	7665.24	9535.37	11626.3	14243.2	18469.1	3557.36	7049.39	9290.81	12048.7	13381.3	16336.5	2.16462e+06	2.47135e+06	2.83785e+06	3.42957e+06	2.12059e+06	2.3491e+06	2.53099e+06	3.26401e+06	3.59888e+06	1.97225e+06	2.25158e+06	2.89176e+06	3.595e+06	4.47209e+06	5.45271e+06	6.68007e+06	8.662e+06	1.6684e+06	3.30616e+06	4.35739e+06	5.65083e+06
typa	b3871		67.355	607		728.17	832.535	1001.23	1384.48	726.483	791.311	868.297	1166.92	1411.53	552.384	615.908	686.448	809.099	1028.84	1135.14	1269.26	1648.01	644.797	751.456	879.923	1015.4	1163.39	1356.62	441999	505349	607748	840377	440975	480326	527056	708319	856800	335297	373856	416674	491123	624503	689033	770441	1.00034e+06	391392	456134	534113	616350
yihx	b3885		22.732	199											123.264																							24529.6
rbn	b3886	[s]	32.929	305
dtd	b3887	[j]	15.95	145			84.9619	87.4412	78.3546	105.314	110.641	95.7335	91.5211	86.4423	101.988								78.4217	76.5283		69.6362	59.3676			12319.5	12679	11361.4	15270.5	16042.9	13881.4	13270.6	12534.1	14788.3								11371.1	11096.6		10097.3
fdhe	b3891	[o]	34.746	309		117.265	94.2368	106.081	88.9141	132.693	130.274	124.206			157.928		144.123	139.136							104.626	83.4347	82.8305	79.835	36234.8	29119.2	32779.1	27474.4	41002.1	40254.8	38379.8			48799.9		44534.2	42993.1							32329.5	25781.3
soda	b3908		23.097	206		44909.2	37951	29943	25339	45220.1	42537.7	33149.8	26983.1	25169.1	49146.7	50016.3	46091.8	42162.1	35485	29654.4	24710.4	18066.3	49605.5	42029.2	35591.9	27987.1	27146.1	15913	9.25129e+06	7.81791e+06	6.16825e+06	5.21983e+06	9.31534e+06	8.76277e+06	6.82886e+06	5.55853e+06	5.18483e+06	1.01242e+07	1.03034e+07	9.49491e+06	8.68538e+06	7.30991e+06	6.10881e+06	5.09034e+06	3.72166e+06	1.02187e+07	8.65801e+06	7.33192e+06	5.76535e+06
yiim	b3910	[s]	25.342	224		175.197	161.626	150.689	133.535	199.065	176.688	162.227	123.835	115.622	174.626									123.043	105.287	96.3285	88.3538	72.609	39244.1	36204.3	33754.4	29911.8	44590.6	39578.1	36338.8	27739.1	25899.4	39116.2									27561.7	23584.2	21577.6
cpxr	b3912	[tk]	26.312	232		1224.58	1013.71	804.047	640.496	1179.43	1079	904.572	751.63	672.084	1396.67	1224.85	1050.48	891.375	618.257	582.962	521.074	355.361	1234.59	907.567	714.375	588.317	517.453	494.296	284102	235181	186539	148595	273627	250328	209861	174378	155924	324028	284164	243712	206799	143436	135247	120889	82443.8	286425	210555	165735	136490
pfka	b3916	[g]	34.842	320		1962.26	2099.17	2283.11	2070.44	2056.77	2042.22	2285.16	2281.8	2368.05	2036.18	1900.63	1963.18	1811.58	1650.72	1711.98	1620.91	1611.37	2043.48	1750.88	1680.66	1602.76	1619.68	1574.74	627923	671734	730595	662540	658167	653510	731250	730175	757775	651577	608202	628219	579706	528231	547835	518690	515637	653915	560282	537813	512883
sbp	b3917	[p]	36.659	329		82.66	142.057	196.98	247.409	66.0992	81.1505	139.27	217.907	234.74	48.5995	49.7825			123.643	137.32	133.096				120.992	153.605	253.153	125.894	27195.1	46736.7	64806.4	81397.4	21746.7	26698.5	45819.9	71691.5	77229.4	15989.2	16378.4			40678.5	45178.4	43788.6				39806.5	50535.9
tpia	b3919	[g]	26.972	255		6537.86	5862.46	5468.5	5295.84	6889.6	6245.53	5685.96	5329.17	5451.39	7263.9	7121.65	6459.52	5592.97	4808.54	4459.24	4060.9	3930.58	7735.8	5754.79	5085.3	4744.74	4203.5	3908.28	1.66716e+06	1.49493e+06	1.39447e+06	1.35044e+06	1.75685e+06	1.59261e+06	1.44992e+06	1.35894e+06	1.3901e+06	1.85229e+06	1.81602e+06	1.64718e+06	1.42621e+06	1.22618e+06	1.13711e+06	1.03553e+06	1.0023e+06	1.97263e+06	1.46747e+06	1.29675e+06	1.20991e+06
uspd	b3923		16.293	142		193.61	206.218	152.063	238.315	216.33		171.583	162.386	153.346										95.5252	89.5122		73.1479	75.0559	27492.7	29282.9	21593	33840.8	30718.9		24364.8	23058.9	21775.1										13564.6	12710.7
fpr	b3924	[c]	27.751	248		100.294	85.4003	66.3091	58.8861	105.81					110.809	116.45								71.9708	41.673	55.7845	42.0119	35.2349	24873	21179.3	16444.7	14603.7	26241					27480.7	28879.5								17848.8	10334.9	13834.6
glpx	b3925	[g]	35.852	336		43.7846	42.0153	45.8558	57.1553	52.2485	44.0185	46.9328	52.9411	56.5668	49.167		48.867	56.8702	52.9201		56.0561	55.9748		69.3249		63.8947	58.0548	49.5249	14711.6	14117.2	15407.5	19204.2	17555.5	14790.2	15769.4	17788.2	19006.4	16520.1		16419.3	19108.4	17781.2		18834.8	18807.5		23293.2		21468.6
glpk	b3926	[c]	56.23	502		500.297	475.085	271.367		754.635	448.365	477.602	191.055		680.413	340.515	69.3662						353.588	347.415	438.872		101.062		251149	238493	136226		378827	225079	239756	95909.7		341567	170939	34821.8						177501	174402	220314
zapb	b3928		9.6347	81		6577.43	6454.42	6959.19	7500.86	6475.29	6604.63	6836.7	7087.81	7470.62	5774.87	6124.62	6767.65	6873.29	5700.84	6627.39	6467.59	7371.45	6593.58	6502.73	6361.66	6443.21	6094.01	6728.36	532772	522808	563694	607570	524499	534975	553773	574113	605120	467764	496094	548180	556737	461768	536818	523875	597087	534080	526721	515295	521900
rraa	b3929	[h]	17.36	161		941.164	890.407	701.99	622.413	978.877	917.982	719.725	691.081	657.548	1036.25	899.787	858.739	549.847	560.787	388.047	307.357	469.116	833.891	664.551	611.25	444.368	401.527	460.579	151527	143356	113020	100208	157599	147795	115876	111264	105865	166836	144866	138257	88525.4	90286.7	62475.6	49484.6	75527.6	134256	106993	98411.3	71543.3
hslu	b3931	[o]	49.593	443		1174.74	1229.15	1317.95	1391.46	1203.25	1181.34	1245.15	1406.29	1383.91	1159.56	1146.38	1318.45	1466.91	1529.02	1554.87	1615.41	1578.12	1157.47	1470.36	1686.62	1709.9	1642.57	1729.03	520410	544513	583851	616415	533041	523334	551604	622986	613072	513683	507845	584073	649839	677357	688807	715625	699107	512761	651372	747172	757484
hslv	b3932	[o]	19.093	176		370.701	347.411	366.991	387.8	375.148	368.274	360.93	408.742	395.074	403.841	439.939	449.883	437.978		443.751	426.551	420.426		460.367	508.91	478.024	402.562	452.889	65243.4	61144.3	64590.4	68252.8	66026.1	64816.3	63523.7	71938.5	69533	71076	77429.3	79179.4	77084.1		78100.2	75073	73995		81024.5	89568.1	84132.3
ftsn	b3933	[d]	35.793	319		72.7527	80.7722	81.2694	88.265	95.9048	85.2397	67.3978	78.9084	87.5464	79.7965							83.0221		60.6706	87.9294	68.9963	62.1728	76.8412	23208.1	25766.3	25924.9	28156.5	30593.6	27191.5	21499.9	25171.8	27927.3	25455.1							26484		19353.9	28049.5	22009.8
rpme	b3936	[j]	7.871	70		9106.15	11385.8	13567.9	14770.2	9518.67	10437.4	12413.9	14146.4	14630.3	9061.05	9835.45	12255.7	14247.8	15209.4	17840.4	18743.4	20074	9301.96	13356.4	15279	17203.7	18029.8	19194.2	637430	797008	949752	1.03391e+06	666307	730619	868971	990246	1.02412e+06	634274	688481	857901	997346	1.06466e+06	1.24883e+06	1.31204e+06	1.40518e+06	651137	934951	1.06953e+06	1.20426e+06
metj	b3938	[ke]	12.141	105		1708.53	1830.23	1871.71	2108.17	1679.26	1518.67	1910.75	2172	2152.72	1425.85	1535.61	1690.73	1649.7	1792.56	1869.49	1763.32	1208.18	1638.49	1653.06	1678.35	1836.84	1906.13	1941.28	179396	192174	196530	221357	176323	159460	200629	228060	226036	149714	161239	177527	173219	188219	196297	185148	126859	172041	173571	176226	192868
metb	b3939	[e]	41.55	386		393.827	455.316	496.902	418.857	396.184	417.339	438.736	512.095	440.612	201.469	204.139	209.103	223.103	214.687	232.617	189.953	155.659	198.054	218.142	222.054	187.36	194.527	177.411	152017	175752	191804	161679	152927	161093	169352	197669	170076	77767.2	78797.8	80713.9	86117.8	82869.3	89790.2	73321.7	60084.2	76448.8	84202.7	85712.7	72320.8
metl	b3940	[e]	88.887	810		85.1687	100.953	128.075	142.553	72.7428	87.9322	97.1336	150.646	150.884	55.511	59.9934	73.3736	82.436	88.8042	84.3779	86.1923	96.743	53.2684	66.6608	76.0524	81.113	81.6879	96.5279	68986.6	81771.6	103741	115468	58921.7	71225.1	78678.2	122023	122216	44963.9	48594.7	59432.6	66773.1	71931.4	68346.1	69815.7	78361.9	43147.4	53995.2	61602.4	65701.5
metf	b3941	[e]	33.102	296		887.103	1210.82	1591.21	1735.45	874.621	1037.14	1292.86	1688.78	1702.64	400.25	409.379	557.545	643.653	834.425	860.674	795.612	758.768	516.955	653.399	736.725	884.721	879.151	947.622	262583	358402	470999	513694	258888	306993	382687	499878	503980	118474	121176	165033	190521	246990	254760	235501	224595	153019	193406	218071	261877
katg	b3942	[p]	80.023	726		2365.99	1675.99	1171.1	756.467	2494.54	2154.88	1425	896.742	825.298	2972.57	2449.45	2093.87	1520.72	987.917	789.141	659.446	519.462	2012.14	1641.58	1172.44	833.862	679.739	571.462	1.71771e+06	1.21677e+06	850216	549195	1.81104e+06	1.56445e+06	1.03455e+06	651035	599166	2.15809e+06	1.7783e+06	1.52015e+06	1.10405e+06	717228	572916	478758	377129	1.46081e+06	1.19178e+06	851193	605384
ptsa	b3947	[g]	91.773	833					27.3124																							22751.2
eptc	b3955		66.609	577		136.907	163.053	186.986	196.741	141.534	161.804	174.426	209.449	213.447	123.693	171.697	181.767	209.709	269.088	253.758	266.851	253.024	139.291	167.41	196.872	199.941	262.33	223.682	78995.2	94081.5	107891	113520	81665.1	93361	100644	120852	123159	71370.8	99069.2	104880	121002	155264	146419	153973	145995	80370.9	96595.5	113595	115366
ppc	b3956	[c]	99.061	883		2521.23	2963.07	3322.83	3980.1	2630.27	2734.95	3223.96	3810	4113.87	1501.02	1614.73	1686.94	1828.04	1995	2110.66	2157.21	2361.08	1562.19	1703.02	1938.67	2015.04	2102.84	2109.5	2.22625e+06	2.61639e+06	2.93406e+06	3.51443e+06	2.32252e+06	2.41496e+06	2.84675e+06	3.36423e+06	3.63255e+06	1.3254e+06	1.4258e+06	1.48957e+06	1.61416e+06	1.76159e+06	1.86371e+06	1.90482e+06	2.08483e+06	1.37941e+06	1.50377e+06	1.71184e+06	1.77928e+06
arge	b3957	[e]	42.347	383		222.249	224.068	281.453	328.118	225.654	218.275	275.688	293.778	333.113	131.43	124.442	130.03	119.743	158.24	161.421	188.899	217.29	135.42	138.57	160.143	169.069	162.238	205.715	85121.3	85818	107797	125669	86425.4	83599.4	105589	112517	127582	50337.9	47661.3	49801.6	45861.5	60605.9	61824.1	72348.2	83222.1	51865.9	53072.3	61334.9	64753.3
argc	b3958	[e]	35.952	334		485.694	570.534	593.391	598.468	389.422	357.266	493.698	670.112	702.458	174.369	216.59	222.438	284.243	274.868	384.131	375.869	471.26	247.327	353.398	274.636	366.748	464.612	579.12	162222	190558	198193	199888	130067	119327	164895	223818	234621	58239.2	72341	74294.3	94937.3	91806	128300	125540	157401	82607.3	118035	91728.6	122494
argb	b3959	[e]	27.159	258		1382.85	1588.67	1517.6	1546.16	943.553	1285.7	1338.57	1459.64	1639	519.867	752.9	542.187	828.114	1308.61	817.426	821.081	787.063	757.148	897.523	715.294	843.23	1002.8	909.313	356776	409878	391542	398910	243437	331709	345351	376587	422863	134126	194248	139884	213654	337620	210896	211839	203062	195344	231561	184546	217553
argh	b3960	[e]	50.318	457		539.132	730.776	1018.91	1213.78	681.094	613.805	926.269	1003.62	1185.63	409.413	398.951	469.456	510.995	504.138	627.324	725.375	1103.99	482.575	518.208	551.188	629.621	810.115	1088.54	246383	333965	465644	554697	311260	280509	423305	458656	541833	187102	182321	214542	233525	230391	286687	331496	504524	220537	236821	251893	287737
oxyr	b3961	[k]	34.276	305		139.775	146.18	135.038	133.836	155.38	250.911	151.395	132.02	120.224	139.793	150.265								145.954	131.339	108.906	109.761	110.212	42631.2	44584.9	41186.7	40819.9	47391	76527.9	46175.5	40266.1	36668.4	42636.8	45830.7								44516	40058.3	33216.3
stha	b3962	[c]	51.56	466		2048.91	2138.08	1795.21	1210.94	2044.59	2087.65	1885.47	1586.12	1177.6	2600.73	2833.77	2711.42	2880.65	3222.59	2773.36	2074.69	1313.64	2139.69	2884.86	3066.04	2854.54	2423.71	1946.32	954793	996345	836568	564298	952781	972846	878628	739132	548764	1.21194e+06	1.32054e+06	1.26352e+06	1.34238e+06	1.50173e+06	1.29239e+06	966808	612157	997095	1.34435e+06	1.42877e+06	1.33022e+06
trma	b3965	[j]	41.966	366		118	128.659	127.486	157.107				132.985		116.696		94.475					174.379		133.503	169.386	178.622	216.806	181.367	43187.9	47089.3	46660	57501.1				48672.5		42710.9		34577.8					63822.6		48862.2	61995.4	65375.8
btub	b3966	[h]	68.406	614		240.891	244.709	231.731	232.74	239.228	264.058	227.676	236.484	239.007	265.932	283.542	327.409	368.13	291.147	291.597	297.049	267.449	278.825	298.687	319.336	305.163	292.394	277.353	147907	150251	142283	142902	146886	162131	139793	145201	146750	163282	174095	201029	226032	178764	179040	182388	164214	171198	183394	196073	187370
muri	b3967	[m]	31.002	285
murb	b3972	[m]	37.851	342					5.47996																							1874.15
coaa	b3974	[h]	36.359	316		81.4714	68.3621	67.2006	60.4191	66.4415	63.6662	61.0339			69.7143			65.1656			64.0081		68.8999	71.9212	56.9049	61.678	76.8949	59.966	25745	21602.4	21235.4	19092.4	20995.5	20118.5	19286.7			22029.7			20592.3			20226.6		21772.4	22727.1	17981.9	19490.3
nusg	b3982	[k]	20.531	181		3679.85	3807.15	3800.25	3745.92	3734.55	4044.85	3815.56	3699.93	3673.82	3673.54	3676.32	3881.96	4012.36	3998.47	3853.56	3973.55	3563.2	3662.55	3907.69	4056.98	3874.2	4054.16	3901.65	666052	689094	687845	678012	675954	732117	690615	669687	664961	664911	665414	702635	726237	723723	697494	719213	644939	662921	707292	734313	701231
rplk	b3983	[j]	14.875	142		9415.74	11687.5	14012.5	15624.8	9309.47	10335.2	12850.9	14633	15739.1	8973.42	9877.55	12315.1	14955.5	16404.1	18597.7	19708.3	20421.7	9416.67	13735.4	16155.5	17959	18474.2	20177.9	1.33704e+06	1.65963e+06	1.98978e+06	2.21872e+06	1.32194e+06	1.4676e+06	1.82483e+06	2.07789e+06	2.23496e+06	1.27423e+06	1.40261e+06	1.74875e+06	2.12368e+06	2.32938e+06	2.64088e+06	2.79858e+06	2.89988e+06	1.33717e+06	1.95043e+06	2.29408e+06	2.55018e+06
[truncated: 143 more rows]
[truncated: 4 more columns]
